# Supplementary material for: 5'-UTR SNP of FGF13 causes translational defect and intellectual disability
Source: eLife. 2021 Jun 29;10:e63021. doi: 10.7554/eLife.63021 (PMC8241442; doi:10.7554/eLife.63021)
Supplement: Figure 1—figure supplement 1—source data 1. [file elife-63021-fig1-figsupp1-data1.xlsx]

## Sheet: Figure 1-figure supplement 1A
Figure 1-figure supplement 1A										Cells_name	cell_types	Table TPM	FGF13
Re-analysis of single-cell data from the human fetal prefrontal cortex (Zhong et al., 2018)										GW08_PFC1_sc1	Neurons	GW08_PFC1_sc1	31.78
										GW08_PFC1_sc2	GABAergic neurons	GW08_PFC1_sc2	378.88
PS: sort cell_types and get neurons or stem cells (NPC in the figure)										GW08_PFC1_sc3	Neurons	GW08_PFC1_sc3	301.74
										GW08_PFC1_sc4	Neurons	GW08_PFC1_sc4	0
										GW08_PFC1_sc5	Microglia	GW08_PFC1_sc5	0
										GW08_PFC1_sc6	Microglia	GW08_PFC1_sc6	0
										GW08_PFC1_sc7	Stem cells	GW08_PFC1_sc7	17.75
										GW08_PFC1_sc8	Neurons	GW08_PFC1_sc8	0
										GW08_PFC1_sc9	Neurons	GW08_PFC1_sc9	264.31
										GW08_PFC1_sc11	Stem cells	GW08_PFC1_sc11	409.65
										GW08_PFC1_sc12	Neurons	GW08_PFC1_sc12	0
										GW08_PFC1_sc13	Neurons	GW08_PFC1_sc13	0
										GW08_PFC1_sc14	Neurons	GW08_PFC1_sc14	35.24
										GW08_PFC1_sc15	Neurons	GW08_PFC1_sc15	86.49
										GW08_PFC1_sc16	GABAergic neurons	GW08_PFC1_sc16	521.1
										GW08_PFC1_sc17	Neurons	GW08_PFC1_sc17	17.57
										GW08_PFC1_sc18	Stem cells	GW08_PFC1_sc18	27.7
										GW08_PFC1_sc19	GABAergic neurons	GW08_PFC1_sc19	0
										GW08_PFC1_sc20	Neurons	GW08_PFC1_sc20	22.14
										GW08_PFC1_sc21	Neurons	GW08_PFC1_sc21	0
										GW08_PFC1_sc22	Neurons	GW08_PFC1_sc22	0
										GW08_PFC1_sc24	Neurons	GW08_PFC1_sc24	0
										GW08_PFC1_sc25	Neurons	GW08_PFC1_sc25	221.93
										GW09_PFC1_sc1	Stem cells	GW09_PFC1_sc1	79.03
										GW09_PFC1_sc2	Stem cells	GW09_PFC1_sc2	0
										GW09_PFC1_sc3	Stem cells	GW09_PFC1_sc3	0
										GW09_PFC1_sc4	Neurons	GW09_PFC1_sc4	20.13
										GW09_PFC1_sc5	Stem cells	GW09_PFC1_sc5	0
										GW09_PFC1_sc6	Neurons	GW09_PFC1_sc6	0
										GW09_PFC1_sc7	Neurons	GW09_PFC1_sc7	0
										GW09_PFC1_sc8	Neurons	GW09_PFC1_sc8	0
										GW09_PFC1_sc9	Neurons	GW09_PFC1_sc9	428.8
										GW09_PFC1_sc10	Neurons	GW09_PFC1_sc10	249.94
										GW09_PFC1_sc11	Stem cells	GW09_PFC1_sc11	0
										GW09_PFC1_sc12	Neurons	GW09_PFC1_sc12	113.73
										GW09_PFC1_sc13	Neurons	GW09_PFC1_sc13	4.43
										GW09_PFC1_sc14	Neurons	GW09_PFC1_sc14	124.05
										GW09_PFC1_sc15	Neurons	GW09_PFC1_sc15	0
										GW09_PFC1_sc16	Neurons	GW09_PFC1_sc16	22.25
										GW09_PFC1_sc17	Stem cells	GW09_PFC1_sc17	0
										GW09_PFC1_sc18	Neurons	GW09_PFC1_sc18	0
										GW09_PFC1_sc19	Stem cells	GW09_PFC1_sc19	0
										GW09_PFC1_sc20	Stem cells	GW09_PFC1_sc20	0
										GW09_PFC1_sc21	Neurons	GW09_PFC1_sc21	0
										GW09_PFC1_sc22	Stem cells	GW09_PFC1_sc22	0
										GW09_PFC1_sc23	Stem cells	GW09_PFC1_sc23	0
										GW09_PFC1_sc24	Stem cells	GW09_PFC1_sc24	0
										GW09_PFC1_sc25	Stem cells	GW09_PFC1_sc25	0
										GW09_PFC1_sc26	Stem cells	GW09_PFC1_sc26	5.85
										GW09_PFC1_sc27	Stem cells	GW09_PFC1_sc27	126.93
										GW09_PFC1_sc28	Neurons	GW09_PFC1_sc28	0
										GW09_PFC1_sc29	Neurons	GW09_PFC1_sc29	56.12
										GW09_PFC1_sc30	Neurons	GW09_PFC1_sc30	8.19
										GW09_PFC1_sc31	Neurons	GW09_PFC1_sc31	234.78
										GW09_PFC1_sc32	GABAergic neurons	GW09_PFC1_sc32	0
										GW09_PFC1_sc33	Neurons	GW09_PFC1_sc33	178
										GW09_PFC1_sc34	Stem cells	GW09_PFC1_sc34	34
										GW09_PFC1_sc35	Stem cells	GW09_PFC1_sc35	0
										GW09_PFC1_sc36	Stem cells	GW09_PFC1_sc36	0
										GW09_PFC1_sc37	Stem cells	GW09_PFC1_sc37	0
										GW09_PFC1_sc38	Neurons	GW09_PFC1_sc38	124.59
										GW09_PFC1_sc39	Stem cells	GW09_PFC1_sc39	0
										GW09_PFC1_sc40	Stem cells	GW09_PFC1_sc40	0
										GW09_PFC1_sc41	Stem cells	GW09_PFC1_sc41	4.93
										GW09_PFC1_sc42	Stem cells	GW09_PFC1_sc42	0
										GW09_PFC1_sc43	Neurons	GW09_PFC1_sc43	0
										GW09_PFC1_sc44	Stem cells	GW09_PFC1_sc44	0
										GW09_PFC1_sc45	Stem cells	GW09_PFC1_sc45	0
										GW09_PFC1_sc46	Neurons	GW09_PFC1_sc46	0
										GW09_PFC1_sc47	Stem cells	GW09_PFC1_sc47	3.09
										GW09_PFC1_sc48	Stem cells	GW09_PFC1_sc48	0
										GW09_PFC1_sc49	Stem cells	GW09_PFC1_sc49	0
										GW09_PFC1_sc50	Stem cells	GW09_PFC1_sc50	0
										GW09_PFC1_sc51	Stem cells	GW09_PFC1_sc51	0
										GW09_PFC1_sc52	GABAergic neurons	GW09_PFC1_sc52	66.67
										GW09_PFC1_sc53	Stem cells	GW09_PFC1_sc53	0
										GW09_PFC1_sc54	Neurons	GW09_PFC1_sc54	0
										GW09_PFC1_sc55	Stem cells	GW09_PFC1_sc55	0
										GW09_PFC1_sc56	Neurons	GW09_PFC1_sc56	24.58
										GW09_PFC1_sc57	Neurons	GW09_PFC1_sc57	205
										GW09_PFC1_sc58	Neurons	GW09_PFC1_sc58	0
										GW09_PFC1_sc59	Neurons	GW09_PFC1_sc59	547.44
										GW09_PFC1_sc60	GABAergic neurons	GW09_PFC1_sc60	0
										GW09_PFC1_sc61	Neurons	GW09_PFC1_sc61	0
										GW09_PFC1_sc62	Stem cells	GW09_PFC1_sc62	208.95
										GW09_PFC1_sc63	Stem cells	GW09_PFC1_sc63	7.46
										GW09_PFC1_sc64	Stem cells	GW09_PFC1_sc64	0
										GW09_PFC1_sc65	Stem cells	GW09_PFC1_sc65	21.93
										GW09_PFC1_sc66	Stem cells	GW09_PFC1_sc66	0
										GW09_PFC1_sc67	Stem cells	GW09_PFC1_sc67	0
										GW09_PFC1_sc68	Neurons	GW09_PFC1_sc68	0
										GW09_PFC1_sc69	Neurons	GW09_PFC1_sc69	153.39
										GW09_PFC1_sc70	Neurons	GW09_PFC1_sc70	130.51
										GW09_PFC1_sc71	Stem cells	GW09_PFC1_sc71	0
										GW09_PFC1_sc72	Stem cells	GW09_PFC1_sc72	0
										GW09_PFC1_sc73	Neurons	GW09_PFC1_sc73	187.09
										GW09_PFC1_sc74	Stem cells	GW09_PFC1_sc74	0
										GW09_PFC1_sc75	Stem cells	GW09_PFC1_sc75	5.65
										GW09_PFC1_sc76	Neurons	GW09_PFC1_sc76	41.05
										GW09_PFC1_sc77	Stem cells	GW09_PFC1_sc77	0
										GW09_PFC1_sc78	Neurons	GW09_PFC1_sc78	422.29
										GW09_PFC1_sc79	Stem cells	GW09_PFC1_sc79	0
										GW09_PFC1_sc80	Stem cells	GW09_PFC1_sc80	10.24
										GW09_PFC1_sc81	Stem cells	GW09_PFC1_sc81	0
										GW09_PFC1_sc82	Stem cells	GW09_PFC1_sc82	0
										GW09_PFC1_sc83	Stem cells	GW09_PFC1_sc83	0
										GW09_PFC1_sc84	Neurons	GW09_PFC1_sc84	0
										GW09_PFC1_sc85	Stem cells	GW09_PFC1_sc85	0
										GW09_PFC1_sc86	Neurons	GW09_PFC1_sc86	0
										GW09_PFC1_sc87	Stem cells	GW09_PFC1_sc87	0
										GW09_PFC1_sc88	Stem cells	GW09_PFC1_sc88	4.23
										GW10_PFC1_sc1	Neurons	GW10_PFC1_sc1	336.7
										GW10_PFC1_sc2	GABAergic neurons	GW10_PFC1_sc2	0
										GW10_PFC1_sc3	Neurons	GW10_PFC1_sc3	25.01
										GW10_PFC1_sc4	Stem cells	GW10_PFC1_sc4	0
										GW10_PFC1_sc5	Neurons	GW10_PFC1_sc5	375.24
										GW10_PFC1_sc6	Neurons	GW10_PFC1_sc6	0
										GW10_PFC1_sc7	Neurons	GW10_PFC1_sc7	131.78
										GW10_PFC1_sc8	Neurons	GW10_PFC1_sc8	319.68
										GW10_PFC1_sc9	Neurons	GW10_PFC1_sc9	5.88
										GW10_PFC1_sc11	Stem cells	GW10_PFC1_sc11	22.61
										GW10_PFC1_sc12	Neurons	GW10_PFC1_sc12	136.49
										GW10_PFC1_sc13	Neurons	GW10_PFC1_sc13	171.4
										GW10_PFC1_sc14	Stem cells	GW10_PFC1_sc14	7.41
										GW10_PFC1_sc15	Neurons	GW10_PFC1_sc15	0
										GW10_PFC1_sc16	Neurons	GW10_PFC1_sc16	0
										GW10_PFC1_sc17	Neurons	GW10_PFC1_sc17	0
										GW10_PFC1_sc18	Neurons	GW10_PFC1_sc18	0
										GW10_PFC1_sc19	Stem cells	GW10_PFC1_sc19	0
										GW10_PFC1_sc20	Neurons	GW10_PFC1_sc20	0
										GW10_PFC1_sc21	Neurons	GW10_PFC1_sc21	195.13
										GW10_PFC1_sc22	Neurons	GW10_PFC1_sc22	11.57
										GW10_PFC1_sc24	Stem cells	GW10_PFC1_sc24	46.25
										GW10_PFC1_sc25	Neurons	GW10_PFC1_sc25	198.1
										GW10_PFC1_sc26	Neurons	GW10_PFC1_sc26	320.36
										GW10_PFC1_sc27	Neurons	GW10_PFC1_sc27	269.9
										GW10_PFC1_sc28	Stem cells	GW10_PFC1_sc28	157.84
										GW10_PFC1_sc29	Stem cells	GW10_PFC1_sc29	0
										GW10_PFC1_sc30	Stem cells	GW10_PFC1_sc30	5.77
										GW10_PFC1_sc31	Stem cells	GW10_PFC1_sc31	0
										GW10_PFC1_sc32	Stem cells	GW10_PFC1_sc32	116.29
										GW10_PFC1_sc33	Neurons	GW10_PFC1_sc33	138.3
										GW10_PFC1_sc34	Neurons	GW10_PFC1_sc34	140.78
										GW10_PFC1_sc35	Neurons	GW10_PFC1_sc35	0
										GW10_PFC1_sc36	Neurons	GW10_PFC1_sc36	428.17
										GW10_PFC1_sc37	GABAergic neurons	GW10_PFC1_sc37	0
										GW10_PFC1_sc38	Neurons	GW10_PFC1_sc38	133.99
										GW10_PFC1_sc39	Stem cells	GW10_PFC1_sc39	390.84
										GW10_PFC1_sc40	Neurons	GW10_PFC1_sc40	315.5
										GW10_PFC1_sc41	Neurons	GW10_PFC1_sc41	41
										GW10_PFC1_sc42	Stem cells	GW10_PFC1_sc42	0
										GW10_PFC1_sc43	Neurons	GW10_PFC1_sc43	80.43
										GW10_PFC1_sc44	Neurons	GW10_PFC1_sc44	36.44
										GW10_PFC1_sc45	Neurons	GW10_PFC1_sc45	0
										GW10_PFC1_sc46	Stem cells	GW10_PFC1_sc46	428.16
										GW10_PFC1_sc47	Neurons	GW10_PFC1_sc47	325.76
										GW10_PFC1_sc49	Stem cells	GW10_PFC1_sc49	0
										GW10_PFC1_sc50	Neurons	GW10_PFC1_sc50	12
										GW10_PFC2_sc1	Stem cells	GW10_PFC2_sc1	105.5
										GW10_PFC2_sc2	Neurons	GW10_PFC2_sc2	62.37
										GW10_PFC2_sc3	Stem cells	GW10_PFC2_sc3	568.87
										GW10_PFC2_sc4	Neurons	GW10_PFC2_sc4	243.03
										GW10_PFC2_sc5	Stem cells	GW10_PFC2_sc5	359.73
										GW10_PFC2_sc6	Neurons	GW10_PFC2_sc6	0
										GW10_PFC2_sc8	Stem cells	GW10_PFC2_sc8	0
										GW10_PFC2_sc9	Neurons	GW10_PFC2_sc9	116.9
										GW10_PFC2_sc10	Neurons	GW10_PFC2_sc10	232.02
										GW10_PFC2_sc11	Stem cells	GW10_PFC2_sc11	113.62
										GW10_PFC2_sc12	Neurons	GW10_PFC2_sc12	420.49
										GW10_PFC2_sc13	Stem cells	GW10_PFC2_sc13	0
										GW10_PFC2_sc14	Neurons	GW10_PFC2_sc14	0
										GW10_PFC2_sc15	Neurons	GW10_PFC2_sc15	0
										GW10_PFC2_sc17	Neurons	GW10_PFC2_sc17	0
										GW10_PFC2_sc19	Stem cells	GW10_PFC2_sc19	0
										GW10_PFC2_sc20	Neurons	GW10_PFC2_sc20	0
										GW10_PFC2_sc21	Neurons	GW10_PFC2_sc21	306.84
										GW10_PFC2_sc22	Neurons	GW10_PFC2_sc22	269.36
										GW10_PFC2_sc23	Neurons	GW10_PFC2_sc23	0
										GW10_PFC2_sc24	Neurons	GW10_PFC2_sc24	484.65
										GW10_PFC2_sc25	Neurons	GW10_PFC2_sc25	691.38
										GW10_PFC2_sc26	GABAergic neurons	GW10_PFC2_sc26	0
										GW10_PFC2_sc27	Neurons	GW10_PFC2_sc27	116.52
										GW10_PFC2_sc29	Neurons	GW10_PFC2_sc29	0
										GW10_PFC2_sc30	Stem cells	GW10_PFC2_sc30	31.25
										GW10_PFC2_sc31	Stem cells	GW10_PFC2_sc31	23.32
										GW10_PFC2_sc32	Stem cells	GW10_PFC2_sc32	0
										GW10_PFC2_sc33	Stem cells	GW10_PFC2_sc33	33.82
										GW10_PFC2_sc34	Stem cells	GW10_PFC2_sc34	40.95
										GW10_PFC2_sc35	Stem cells	GW10_PFC2_sc35	114.27
										GW10_PFC2_sc36	Stem cells	GW10_PFC2_sc36	0
										GW10_PFC2_sc37	Stem cells	GW10_PFC2_sc37	0
										GW10_PFC2_sc38	Stem cells	GW10_PFC2_sc38	0
										GW10_PFC2_sc39	Stem cells	GW10_PFC2_sc39	22.05
										GW10_PFC2_sc40	Stem cells	GW10_PFC2_sc40	0
										GW10_PFC2_sc41	Neurons	GW10_PFC2_sc41	7.73
										GW10_PFC2_sc42	Stem cells	GW10_PFC2_sc42	0
										GW10_PFC2_sc43	Stem cells	GW10_PFC2_sc43	0
										GW10_PFC2_sc44	Stem cells	GW10_PFC2_sc44	0
										GW10_PFC2_sc45	Stem cells	GW10_PFC2_sc45	11.2
										GW10_PFC2_sc46	Stem cells	GW10_PFC2_sc46	0
										GW10_PFC2_sc47	Stem cells	GW10_PFC2_sc47	0
										GW10_PFC2_sc48	Stem cells	GW10_PFC2_sc48	5.83
										GW10_PFC2_sc49	Neurons	GW10_PFC2_sc49	0
										GW10_PFC2_sc50	Stem cells	GW10_PFC2_sc50	0
										GW10_PFC2_sc51	Stem cells	GW10_PFC2_sc51	3.26
										GW10_PFC2_sc52	Neurons	GW10_PFC2_sc52	0
										GW10_PFC2_sc53	Neurons	GW10_PFC2_sc53	179.16
										GW10_PFC2_sc54	Stem cells	GW10_PFC2_sc54	0
										GW10_PFC2_sc56	Neurons	GW10_PFC2_sc56	0
										GW10_PFC2_sc57	Neurons	GW10_PFC2_sc57	190.28
										GW10_PFC2_sc58	Stem cells	GW10_PFC2_sc58	268.72
										GW10_PFC2_sc59	Stem cells	GW10_PFC2_sc59	0
										GW10_PFC2_sc60	Stem cells	GW10_PFC2_sc60	0
										GW10_PFC2_sc61	Neurons	GW10_PFC2_sc61	56.02
										GW10_PFC2_sc62	Stem cells	GW10_PFC2_sc62	55.12
										GW10_PFC2_sc63	Stem cells	GW10_PFC2_sc63	13.82
										GW10_PFC2_sc64	Neurons	GW10_PFC2_sc64	128.42
										GW10_PFC2_sc65	Stem cells	GW10_PFC2_sc65	244.95
										GW10_PFC2_sc66	Stem cells	GW10_PFC2_sc66	0
										GW10_PFC2_sc67	Neurons	GW10_PFC2_sc67	0
										GW10_PFC2_sc68	Neurons	GW10_PFC2_sc68	0
										GW10_PFC2_sc69	Stem cells	GW10_PFC2_sc69	0
										GW10_PFC2_sc70	Stem cells	GW10_PFC2_sc70	155.1
										GW10_PFC2_sc71	Neurons	GW10_PFC2_sc71	28.92
										GW10_PFC2_sc72	Neurons	GW10_PFC2_sc72	0
										GW10_PFC2_sc73	GABAergic neurons	GW10_PFC2_sc73	217.85
										GW10_PFC2_sc74	Neurons	GW10_PFC2_sc74	88.75
										GW10_PFC2_sc75	Neurons	GW10_PFC2_sc75	213.54
										GW10_PFC2_sc76	Stem cells	GW10_PFC2_sc76	13.25
										GW10_PFC2_sc77	Neurons	GW10_PFC2_sc77	180.81
										GW10_PFC2_sc78	Stem cells	GW10_PFC2_sc78	0
										GW10_PFC2_sc79	Stem cells	GW10_PFC2_sc79	0
										GW10_PFC2_sc80	Neurons	GW10_PFC2_sc80	0
										GW10_PFC2_sc81	Neurons	GW10_PFC2_sc81	0
										GW10_PFC2_sc82	Neurons	GW10_PFC2_sc82	0
										GW10_PFC2_sc83	Neurons	GW10_PFC2_sc83	0
										GW10_PFC2_sc84	Neurons	GW10_PFC2_sc84	0
										GW10_PFC2_sc85	Neurons	GW10_PFC2_sc85	92.67
										GW10_PFC2_sc86	Neurons	GW10_PFC2_sc86	0
										GW10_PFC2_sc87	Neurons	GW10_PFC2_sc87	290.35
										GW10_PFC2_sc88	GABAergic neurons	GW10_PFC2_sc88	0
										GW10_PFC2_sc89	Neurons	GW10_PFC2_sc89	8.68
										GW10_PFC2_sc91	GABAergic neurons	GW10_PFC2_sc91	0
										GW10_PFC2_sc92	Stem cells	GW10_PFC2_sc92	0
										GW10_PFC2_sc93	Neurons	GW10_PFC2_sc93	28.09
										GW10_PFC2_sc94	Neurons	GW10_PFC2_sc94	4.37
										GW10_PFC2_sc95	Stem cells	GW10_PFC2_sc95	0
										GW10_PFC2_sc96	Neurons	GW10_PFC2_sc96	6.3
										GW10_PFC3_sc1	Stem cells	GW10_PFC3_sc1	10.26
										GW10_PFC3_sc2	GABAergic neurons	GW10_PFC3_sc2	0
										GW10_PFC3_sc3	Neurons	GW10_PFC3_sc3	0
										GW10_PFC3_sc4	Stem cells	GW10_PFC3_sc4	0
										GW10_PFC3_sc5	Neurons	GW10_PFC3_sc5	296.48
										GW10_PFC3_sc6	Neurons	GW10_PFC3_sc6	98.26
										GW10_PFC3_sc7	Neurons	GW10_PFC3_sc7	0
										GW10_PFC3_sc8	Neurons	GW10_PFC3_sc8	17.73
										GW10_PFC3_sc9	Stem cells	GW10_PFC3_sc9	4.76
										GW10_PFC3_sc10	Neurons	GW10_PFC3_sc10	0
										GW10_PFC3_sc11	Neurons	GW10_PFC3_sc11	0
										GW10_PFC3_sc12	Stem cells	GW10_PFC3_sc12	2.24
										GW10_PFC3_sc13	Stem cells	GW10_PFC3_sc13	14.59
										GW10_PFC3_sc14	Neurons	GW10_PFC3_sc14	0
										GW10_PFC3_sc15	Stem cells	GW10_PFC3_sc15	0
										GW10_PFC3_sc16	Neurons	GW10_PFC3_sc16	343.93
										GW10_PFC3_sc17	Stem cells	GW10_PFC3_sc17	0
										GW10_PFC3_sc18	Stem cells	GW10_PFC3_sc18	0
										GW10_PFC3_sc19	Stem cells	GW10_PFC3_sc19	0
										GW10_PFC3_sc20	Stem cells	GW10_PFC3_sc20	14.22
										GW10_PFC3_sc21	Stem cells	GW10_PFC3_sc21	0
										GW10_PFC3_sc22	Neurons	GW10_PFC3_sc22	7.65
										GW10_PFC3_sc23	Stem cells	GW10_PFC3_sc23	129.94
										GW10_PFC3_sc24	Neurons	GW10_PFC3_sc24	0
										GW10_PFC3_sc25	Neurons	GW10_PFC3_sc25	24.74
										GW10_PFC3_sc26	Stem cells	GW10_PFC3_sc26	0
										GW10_PFC3_sc27	Neurons	GW10_PFC3_sc27	124.9
										GW10_PFC3_sc28	Neurons	GW10_PFC3_sc28	0
										GW10_PFC3_sc29	Neurons	GW10_PFC3_sc29	18.67
										GW10_PFC3_sc30	Stem cells	GW10_PFC3_sc30	0
										GW10_PFC3_sc32	Neurons	GW10_PFC3_sc32	0
										GW10_PFC3_sc33	Neurons	GW10_PFC3_sc33	0
										GW10_PFC3_sc34	Stem cells	GW10_PFC3_sc34	402.48
										GW10_PFC3_sc35	Stem cells	GW10_PFC3_sc35	2.99
										GW10_PFC3_sc36	Stem cells	GW10_PFC3_sc36	4.23
										GW10_PFC3_sc37	Stem cells	GW10_PFC3_sc37	0
										GW10_PFC3_sc38	Neurons	GW10_PFC3_sc38	2.53
										GW10_PFC3_sc39	Stem cells	GW10_PFC3_sc39	0
										GW10_PFC3_sc40	Stem cells	GW10_PFC3_sc40	0
										GW10_PFC3_sc41	Stem cells	GW10_PFC3_sc41	138.98
										GW10_PFC3_sc42	Stem cells	GW10_PFC3_sc42	74.25
										GW10_PFC3_sc43	Stem cells	GW10_PFC3_sc43	7.94
										GW10_PFC3_sc44	Stem cells	GW10_PFC3_sc44	0
										GW10_PFC3_sc45	Stem cells	GW10_PFC3_sc45	118.4
										GW10_PFC3_sc46	Stem cells	GW10_PFC3_sc46	0
										GW10_PFC3_sc47	Stem cells	GW10_PFC3_sc47	125.54
										GW10_PFC3_sc48	Stem cells	GW10_PFC3_sc48	3.96
										GW10_PFC2_sc16	Microglia	GW10_PFC2_sc16	0
										GW10_PFC2_sc42	Microglia	GW10_PFC2_sc42	0
										GW12_PFC1_sc1	Neurons	GW12_PFC1_sc1	191.16
										GW12_PFC1_sc2	GABAergic neurons	GW12_PFC1_sc2	6.33
										GW12_PFC1_sc3	Neurons	GW12_PFC1_sc3	89.36
										GW12_PFC1_sc4	Neurons	GW12_PFC1_sc4	2.83
										GW12_PFC1_sc5	Neurons	GW12_PFC1_sc5	57.91
										GW12_PFC1_sc6	Stem cells	GW12_PFC1_sc6	97.98
										GW12_PFC1_sc7	Neurons	GW12_PFC1_sc7	77.72
										GW12_PFC1_sc8	Neurons	GW12_PFC1_sc8	0
										GW12_PFC1_sc9	Stem cells	GW12_PFC1_sc9	56.81
										GW12_PFC1_sc10	Stem cells	GW12_PFC1_sc10	0
										GW12_PFC1_sc11	Neurons	GW12_PFC1_sc11	192.01
										GW12_PFC1_sc12	Neurons	GW12_PFC1_sc12	9.23
										GW12_PFC1_sc13	Neurons	GW12_PFC1_sc13	838.39
										GW12_PFC1_sc14	Stem cells	GW12_PFC1_sc14	240.18
										GW12_PFC1_sc15	Neurons	GW12_PFC1_sc15	472.61
										GW12_PFC1_sc16	GABAergic neurons	GW12_PFC1_sc16	55.07
										GW12_PFC1_sc17	Neurons	GW12_PFC1_sc17	0
										GW12_PFC1_sc18	Stem cells	GW12_PFC1_sc18	0
										GW12_PFC1_sc19	Neurons	GW12_PFC1_sc19	12.23
										GW12_PFC1_sc20	Stem cells	GW12_PFC1_sc20	0
										GW12_PFC1_sc21	Neurons	GW12_PFC1_sc21	0
										GW12_PFC1_sc22	Neurons	GW12_PFC1_sc22	0
										GW12_PFC1_sc24	Neurons	GW12_PFC1_sc24	71
										GW12_PFC1_sc25	Neurons	GW12_PFC1_sc25	18.71
										GW12_PFC1_sc26	Neurons	GW12_PFC1_sc26	0
										GW12_PFC1_sc27	Stem cells	GW12_PFC1_sc27	53.3
										GW12_PFC1_sc28	Stem cells	GW12_PFC1_sc28	0
										GW12_PFC1_sc29	Neurons	GW12_PFC1_sc29	639.21
										GW12_PFC1_sc30	Neurons	GW12_PFC1_sc30	4.81
										GW12_PFC1_sc31	Neurons	GW12_PFC1_sc31	7.12
										GW12_PFC1_sc32	Neurons	GW12_PFC1_sc32	0
										GW12_PFC1_sc33	Neurons	GW12_PFC1_sc33	123.18
										GW12_PFC1_sc35	Stem cells	GW12_PFC1_sc35	0
										GW12_PFC1_sc36	Neurons	GW12_PFC1_sc36	262.08
										GW12_PFC1_sc37	Neurons	GW12_PFC1_sc37	0
										GW12_PFC1_sc38	Neurons	GW12_PFC1_sc38	225.07
										GW12_PFC1_sc39	Neurons	GW12_PFC1_sc39	0
										GW12_PFC1_sc40	Stem cells	GW12_PFC1_sc40	63.18
										GW12_PFC1_sc41	Neurons	GW12_PFC1_sc41	188.21
										GW12_PFC1_sc42	OPC	GW12_PFC1_sc42	3.28
										GW12_PFC1_sc43	Stem cells	GW12_PFC1_sc43	24.53
										GW12_PFC1_sc44	GABAergic neurons	GW12_PFC1_sc44	0
										GW12_PFC1_sc45	Neurons	GW12_PFC1_sc45	303.38
										GW12_PFC1_sc46	Neurons	GW12_PFC1_sc46	0
										GW12_PFC1_sc47	Neurons	GW12_PFC1_sc47	8.68
										GW12_PFC1_sc48	Neurons	GW12_PFC1_sc48	204
										GW12_PFC1_sc49	Neurons	GW12_PFC1_sc49	6.27
										GW12_PFC1_sc50	Neurons	GW12_PFC1_sc50	133.11
										GW12_PFC1_sc51	Neurons	GW12_PFC1_sc51	134.02
										GW12_PFC1_sc52	Neurons	GW12_PFC1_sc52	4.86
										GW12_PFC1_sc53	Neurons	GW12_PFC1_sc53	20.51
										GW12_PFC1_sc54	Neurons	GW12_PFC1_sc54	168.19
										GW12_PFC1_sc56	Neurons	GW12_PFC1_sc56	0
										GW12_PFC1_sc57	Neurons	GW12_PFC1_sc57	5.98
										GW12_PFC1_sc58	Neurons	GW12_PFC1_sc58	0
										GW12_PFC1_sc59	Neurons	GW12_PFC1_sc59	76.35
										GW12_PFC1_sc60	Stem cells	GW12_PFC1_sc60	0
										GW12_PFC1_sc61	GABAergic neurons	GW12_PFC1_sc61	0
										GW12_PFC1_sc62	Neurons	GW12_PFC1_sc62	0
										GW12_PFC1_sc63	Neurons	GW12_PFC1_sc63	254.18
										GW12_PFC1_sc64	Neurons	GW12_PFC1_sc64	0
										GW12_PFC1_sc65	Neurons	GW12_PFC1_sc65	17.91
										GW12_PFC1_sc67	Neurons	GW12_PFC1_sc67	0
										GW12_PFC1_sc68	Neurons	GW12_PFC1_sc68	5.61
										GW12_PFC1_sc69	Neurons	GW12_PFC1_sc69	0
										GW12_PFC1_sc70	Neurons	GW12_PFC1_sc70	0
										GW12_PFC1_sc71	Neurons	GW12_PFC1_sc71	0
										GW12_PFC1_sc72	Neurons	GW12_PFC1_sc72	11.23
										GW12_PFC1_sc73	GABAergic neurons	GW12_PFC1_sc73	0
										GW12_PFC1_sc74	Neurons	GW12_PFC1_sc74	0
										GW12_PFC1_sc75	GABAergic neurons	GW12_PFC1_sc75	0
										GW12_PFC1_sc76	Neurons	GW12_PFC1_sc76	0
										GW12_PFC1_sc77	Neurons	GW12_PFC1_sc77	0
										GW12_PFC1_sc78	Neurons	GW12_PFC1_sc78	0
										GW12_PFC1_sc79	Neurons	GW12_PFC1_sc79	291.96
										GW12_PFC1_sc81	Neurons	GW12_PFC1_sc81	87.14
										GW12_PFC1_sc82	Neurons	GW12_PFC1_sc82	0
										GW12_PFC1_sc83	OPC	GW12_PFC1_sc83	5.9
										GW12_PFC1_sc84	Neurons	GW12_PFC1_sc84	0
										GW12_PFC1_sc85	Neurons	GW12_PFC1_sc85	0
										GW12_PFC1_sc87	Neurons	GW12_PFC1_sc87	0
										GW12_PFC1_sc88	Neurons	GW12_PFC1_sc88	0
										GW12_PFC1_sc89	Neurons	GW12_PFC1_sc89	152.29
										GW12_PFC1_sc90	GABAergic neurons	GW12_PFC1_sc90	0
										GW12_PFC1_sc55	Microglia	GW12_PFC1_sc55	4.08
										GW13_PFC1_sc1	Neurons	GW13_PFC1_sc1	14.53
										GW13_PFC1_sc2	Stem cells	GW13_PFC1_sc2	0
										GW13_PFC1_sc3	Neurons	GW13_PFC1_sc3	403.03
										GW13_PFC1_sc4	Neurons	GW13_PFC1_sc4	10.83
										GW13_PFC1_sc5	Neurons	GW13_PFC1_sc5	9.73
										GW13_PFC1_sc6	Neurons	GW13_PFC1_sc6	34.41
										GW13_PFC1_sc7	Neurons	GW13_PFC1_sc7	0
										GW13_PFC1_sc8	Stem cells	GW13_PFC1_sc8	4.33
										GW13_PFC1_sc9	Neurons	GW13_PFC1_sc9	0
										GW13_PFC1_sc10	Neurons	GW13_PFC1_sc10	0
										GW13_PFC1_sc11	Stem cells	GW13_PFC1_sc11	8.9
										GW13_PFC1_sc13	Stem cells	GW13_PFC1_sc13	569
										GW13_PFC1_sc14	Neurons	GW13_PFC1_sc14	161.23
										GW13_PFC1_sc15	Neurons	GW13_PFC1_sc15	0
										GW13_PFC1_sc16	Neurons	GW13_PFC1_sc16	301.03
										GW13_PFC1_sc17	Stem cells	GW13_PFC1_sc17	0
										GW13_PFC1_sc18	Stem cells	GW13_PFC1_sc18	0
										GW13_PFC1_sc19	Neurons	GW13_PFC1_sc19	314.28
										GW13_PFC1_sc20	Neurons	GW13_PFC1_sc20	0
										GW13_PFC1_sc21	Neurons	GW13_PFC1_sc21	396.52
										GW13_PFC1_sc22	Neurons	GW13_PFC1_sc22	234.84
										GW13_PFC1_sc24	Stem cells	GW13_PFC1_sc24	0
										GW13_PFC1_sc25	Neurons	GW13_PFC1_sc25	27.17
										GW13_PFC1_sc12	Microglia	GW13_PFC1_sc12	0
										GW16_PFC1_B2_sc2	Neurons	GW16_PFC1_B2_sc2	227.27
										GW16_PFC1_B2_sc4	Neurons	GW16_PFC1_B2_sc4	47.09
										GW16_PFC1_B2_sc5	Neurons	GW16_PFC1_B2_sc5	0
										GW16_PFC1_B2_sc6	Stem cells	GW16_PFC1_B2_sc6	0
										GW16_PFC1_B2_sc7	Stem cells	GW16_PFC1_B2_sc7	1.28
										GW16_PFC1_B2_sc8	Neurons	GW16_PFC1_B2_sc8	0
										GW16_PFC1_B2_sc9	Neurons	GW16_PFC1_B2_sc9	0
										GW16_PFC1_B2_sc10	Neurons	GW16_PFC1_B2_sc10	0
										GW16_PFC1_B2_sc11	Neurons	GW16_PFC1_B2_sc11	0
										GW16_PFC1_B2_sc12	Stem cells	GW16_PFC1_B2_sc12	16.21
										GW16_PFC1_B2_sc13	Neurons	GW16_PFC1_B2_sc13	9.44
										GW16_PFC1_B2_sc14	GABAergic neurons	GW16_PFC1_B2_sc14	0
										GW16_PFC1_B2_sc15	Neurons	GW16_PFC1_B2_sc15	0
										GW16_PFC1_B2_sc16	Neurons	GW16_PFC1_B2_sc16	0
										GW16_PFC1_B2_sc17	Neurons	GW16_PFC1_B2_sc17	0
										GW16_PFC1_B2_sc18	Neurons	GW16_PFC1_B2_sc18	0
										GW16_PFC1_B2_sc19	Neurons	GW16_PFC1_B2_sc19	0
										GW16_PFC1_B2_sc20	Neurons	GW16_PFC1_B2_sc20	0
										GW16_PFC1_B2_sc21	Neurons	GW16_PFC1_B2_sc21	0
										GW16_PFC1_B2_sc22	Neurons	GW16_PFC1_B2_sc22	0
										GW16_PFC1_B2_sc23	Neurons	GW16_PFC1_B2_sc23	14.34
										GW16_PFC1_B2_sc24	Neurons	GW16_PFC1_B2_sc24	0
										GW16_PFC1_B1_sc1	Neurons	GW16_PFC1_B1_sc1	266.51
										GW16_PFC1_B1_sc2	Neurons	GW16_PFC1_B1_sc2	0
										GW16_PFC1_B1_sc3	Neurons	GW16_PFC1_B1_sc3	16.76
										GW16_PFC1_B1_sc4	Neurons	GW16_PFC1_B1_sc4	0
										GW16_PFC1_B1_sc5	Neurons	GW16_PFC1_B1_sc5	358.31
										GW16_PFC1_B1_sc6	Neurons	GW16_PFC1_B1_sc6	338.38
										GW16_PFC1_B1_sc7	Neurons	GW16_PFC1_B1_sc7	0
										GW16_PFC1_B1_sc8	Neurons	GW16_PFC1_B1_sc8	0
										GW16_PFC1_B1_sc9	Neurons	GW16_PFC1_B1_sc9	0
										GW16_PFC1_B1_sc10	Neurons	GW16_PFC1_B1_sc10	42.01
										GW16_PFC1_B1_sc11	Neurons	GW16_PFC1_B1_sc11	7.49
										GW16_PFC1_B1_sc12	Neurons	GW16_PFC1_B1_sc12	0
										GW16_PFC1_B1_sc13	Neurons	GW16_PFC1_B1_sc13	0
										GW16_PFC1_B1_sc14	Stem cells	GW16_PFC1_B1_sc14	224.42
										GW16_PFC1_B1_sc15	Neurons	GW16_PFC1_B1_sc15	0
										GW16_PFC1_B1_sc16	Neurons	GW16_PFC1_B1_sc16	0
										GW16_PFC1_B1_sc17	Neurons	GW16_PFC1_B1_sc17	4.22
										GW16_PFC1_B1_sc18	Neurons	GW16_PFC1_B1_sc18	0
										GW16_PFC1_B1_sc20	Neurons	GW16_PFC1_B1_sc20	6.57
										GW16_PFC1_B1_sc21	Neurons	GW16_PFC1_B1_sc21	0
										GW16_PFC1_B1_sc22	Neurons	GW16_PFC1_B1_sc22	0
										GW16_PFC1_B1_sc24	Neurons	GW16_PFC1_B1_sc24	302.05
										GW16_PFC1_B4_sc1	Neurons	GW16_PFC1_B4_sc1	0
										GW16_PFC1_B4_sc2	Neurons	GW16_PFC1_B4_sc2	4.25
										GW16_PFC1_B4_sc3	Neurons	GW16_PFC1_B4_sc3	0
										GW16_PFC1_B4_sc4	Neurons	GW16_PFC1_B4_sc4	285.9
										GW16_PFC1_B4_sc5	Neurons	GW16_PFC1_B4_sc5	0
										GW16_PFC1_B4_sc6	Neurons	GW16_PFC1_B4_sc6	0
										GW16_PFC1_B4_sc7	Stem cells	GW16_PFC1_B4_sc7	0
										GW16_PFC1_B4_sc8	Neurons	GW16_PFC1_B4_sc8	127.05
										GW16_PFC1_B4_sc9	GABAergic neurons	GW16_PFC1_B4_sc9	390.58
										GW16_PFC1_B4_sc10	Neurons	GW16_PFC1_B4_sc10	0
										GW16_PFC1_B4_sc11	Neurons	GW16_PFC1_B4_sc11	0
										GW16_PFC1_B4_sc12	Stem cells	GW16_PFC1_B4_sc12	0
										GW16_PFC1_B4_sc14	GABAergic neurons	GW16_PFC1_B4_sc14	0
										GW16_PFC1_B4_sc15	Neurons	GW16_PFC1_B4_sc15	0
										GW16_PFC1_B4_sc16	Neurons	GW16_PFC1_B4_sc16	4.19
										GW16_PFC1_B4_sc17	Stem cells	GW16_PFC1_B4_sc17	191.48
										GW16_PFC1_B4_sc18	Stem cells	GW16_PFC1_B4_sc18	0
										GW16_PFC1_B4_sc19	Neurons	GW16_PFC1_B4_sc19	0
										GW16_PFC1_B4_sc20	Stem cells	GW16_PFC1_B4_sc20	0
										GW16_PFC1_B4_sc21	Stem cells	GW16_PFC1_B4_sc21	1130.94
										GW16_PFC1_B4_sc22	Neurons	GW16_PFC1_B4_sc22	0
										GW16_PFC1_B4_sc23	Stem cells	GW16_PFC1_B4_sc23	0
										GW16_PFC1_B4_sc24	Stem cells	GW16_PFC1_B4_sc24	201.44
										GW16_PFC1_B3_sc1	Neurons	GW16_PFC1_B3_sc1	0
										GW16_PFC1_B3_sc2	Neurons	GW16_PFC1_B3_sc2	0
										GW16_PFC1_B3_sc3	Neurons	GW16_PFC1_B3_sc3	6.94
										GW16_PFC1_B3_sc4	Stem cells	GW16_PFC1_B3_sc4	0
										GW16_PFC1_B3_sc5	Stem cells	GW16_PFC1_B3_sc5	5.32
										GW16_PFC1_B3_sc6	Neurons	GW16_PFC1_B3_sc6	0
										GW16_PFC1_B3_sc7	Neurons	GW16_PFC1_B3_sc7	0
										GW16_PFC1_B3_sc8	Stem cells	GW16_PFC1_B3_sc8	15.55
										GW16_PFC1_B3_sc9	Stem cells	GW16_PFC1_B3_sc9	3.84
										GW16_PFC1_B3_sc10	Neurons	GW16_PFC1_B3_sc10	0
										GW16_PFC1_B3_sc11	Neurons	GW16_PFC1_B3_sc11	0
										GW16_PFC1_B3_sc12	Neurons	GW16_PFC1_B3_sc12	4.28
										GW16_PFC1_B3_sc13	Neurons	GW16_PFC1_B3_sc13	0
										GW16_PFC1_B3_sc14	Neurons	GW16_PFC1_B3_sc14	1.96
										GW16_PFC1_B3_sc15	Neurons	GW16_PFC1_B3_sc15	0
										GW16_PFC1_B3_sc16	Neurons	GW16_PFC1_B3_sc16	7.93
										GW16_PFC1_A1_sc1	Neurons	GW16_PFC1_A1_sc1	7.05
										GW16_PFC1_A1_sc2	Neurons	GW16_PFC1_A1_sc2	2.17
										GW16_PFC1_A1_sc3	Neurons	GW16_PFC1_A1_sc3	4.17
										GW16_PFC1_A1_sc4	Stem cells	GW16_PFC1_A1_sc4	0
										GW16_PFC1_A1_sc5	Neurons	GW16_PFC1_A1_sc5	0
										GW16_PFC1_A1_sc6	Stem cells	GW16_PFC1_A1_sc6	67.71
										GW16_PFC1_A1_sc7	GABAergic neurons	GW16_PFC1_A1_sc7	123.82
										GW16_PFC1_A1_sc8	Neurons	GW16_PFC1_A1_sc8	8.59
										GW16_PFC1_A1_sc9	Neurons	GW16_PFC1_A1_sc9	116.75
										GW16_PFC1_A1_sc10	Stem cells	GW16_PFC1_A1_sc10	1.55
										GW16_PFC1_A1_sc11	GABAergic neurons	GW16_PFC1_A1_sc11	0
										GW16_PFC1_A1_sc12	Stem cells	GW16_PFC1_A1_sc12	7.52
										GW16_PFC1_A1_sc13	Neurons	GW16_PFC1_A1_sc13	12.99
										GW16_PFC1_A1_sc14	Neurons	GW16_PFC1_A1_sc14	5.15
										GW16_PFC1_A1_sc15	Neurons	GW16_PFC1_A1_sc15	41.53
										GW16_PFC1_A1_sc16	Neurons	GW16_PFC1_A1_sc16	0
										GW16_PFC1_A1_sc17	GABAergic neurons	GW16_PFC1_A1_sc17	296.84
										GW16_PFC1_A1_sc18	Neurons	GW16_PFC1_A1_sc18	36.68
										GW16_PFC1_A1_sc19	Stem cells	GW16_PFC1_A1_sc19	15.72
										GW16_PFC1_A1_sc20	Neurons	GW16_PFC1_A1_sc20	0
										GW16_PFC1_A1_sc21	Neurons	GW16_PFC1_A1_sc21	24.07
										GW16_PFC1_A1_sc22	Neurons	GW16_PFC1_A1_sc22	51.82
										GW16_PFC1_A1_sc23	Stem cells	GW16_PFC1_A1_sc23	0
										GW16_PFC1_A1_sc24	Neurons	GW16_PFC1_A1_sc24	19.87
										GW16_PFC1_E1_sc1	Neurons	GW16_PFC1_E1_sc1	4.39
										GW16_PFC1_E1_sc2	Neurons	GW16_PFC1_E1_sc2	21.01
										GW16_PFC1_E1_sc3	Neurons	GW16_PFC1_E1_sc3	220.8
										GW16_PFC1_E1_sc4	Neurons	GW16_PFC1_E1_sc4	8.34
										GW16_PFC1_E1_sc5	GABAergic neurons	GW16_PFC1_E1_sc5	4.73
										GW16_PFC1_E1_sc6	GABAergic neurons	GW16_PFC1_E1_sc6	0
										GW16_PFC1_E1_sc7	Neurons	GW16_PFC1_E1_sc7	329.75
										GW16_PFC1_E1_sc8	Neurons	GW16_PFC1_E1_sc8	256.31
										GW16_PFC1_E1_sc9	Neurons	GW16_PFC1_E1_sc9	3.81
										GW16_PFC1_E1_sc10	Neurons	GW16_PFC1_E1_sc10	104.73
										GW16_PFC1_E1_sc11	Neurons	GW16_PFC1_E1_sc11	4.23
										GW16_PFC1_E1_sc12	Neurons	GW16_PFC1_E1_sc12	0
										GW16_PFC1_E1_sc13	Neurons	GW16_PFC1_E1_sc13	65.35
										GW16_PFC1_E1_sc14	Neurons	GW16_PFC1_E1_sc14	328.25
										GW16_PFC1_E1_sc15	Neurons	GW16_PFC1_E1_sc15	14.27
										GW16_PFC1_E1_sc16	Neurons	GW16_PFC1_E1_sc16	0
										GW16_PFC1_E1_sc17	Neurons	GW16_PFC1_E1_sc17	11.28
										GW16_PFC1_E1_sc18	GABAergic neurons	GW16_PFC1_E1_sc18	0
										GW16_PFC1_E1_sc19	Neurons	GW16_PFC1_E1_sc19	19.86
										GW16_PFC1_E1_sc20	Neurons	GW16_PFC1_E1_sc20	123.03
										GW16_PFC1_E1_sc21	GABAergic neurons	GW16_PFC1_E1_sc21	0
										GW16_PFC1_E1_sc22	Neurons	GW16_PFC1_E1_sc22	5.44
										GW16_PFC1_E1_sc23	Neurons	GW16_PFC1_E1_sc23	0
										GW16_PFC1_E1_sc24	Neurons	GW16_PFC1_E1_sc24	0
										GW16_PFC1_A3_sc1	Stem cells	GW16_PFC1_A3_sc1	2.56
										GW16_PFC1_A3_sc2	Neurons	GW16_PFC1_A3_sc2	18.99
										GW16_PFC1_A3_sc3	Neurons	GW16_PFC1_A3_sc3	10.92
										GW16_PFC1_A3_sc4	Neurons	GW16_PFC1_A3_sc4	607.33
										GW16_PFC1_A3_sc5	Neurons	GW16_PFC1_A3_sc5	5.6
										GW16_PFC1_A3_sc6	Neurons	GW16_PFC1_A3_sc6	0
										GW16_PFC1_A3_sc7	Neurons	GW16_PFC1_A3_sc7	163.52
										GW16_PFC1_A3_sc8	Stem cells	GW16_PFC1_A3_sc8	2.4
										GW16_PFC1_A3_sc9	Neurons	GW16_PFC1_A3_sc9	141.55
										GW16_PFC1_A3_sc10	Stem cells	GW16_PFC1_A3_sc10	0
										GW16_PFC1_A3_sc11	Neurons	GW16_PFC1_A3_sc11	18
										GW16_PFC1_A3_sc12	Neurons	GW16_PFC1_A3_sc12	0
										GW16_PFC1_A3_sc13	Neurons	GW16_PFC1_A3_sc13	7.49
										GW16_PFC1_A3_sc14	Neurons	GW16_PFC1_A3_sc14	0
										GW16_PFC1_A3_sc15	Neurons	GW16_PFC1_A3_sc15	0
										GW16_PFC1_A3_sc16	Stem cells	GW16_PFC1_A3_sc16	0
										GW16_PFC1_A3_sc17	Neurons	GW16_PFC1_A3_sc17	96.78
										GW16_PFC1_A3_sc18	Neurons	GW16_PFC1_A3_sc18	0
										GW16_PFC1_A3_sc19	Neurons	GW16_PFC1_A3_sc19	7.08
										GW16_PFC1_A3_sc20	Neurons	GW16_PFC1_A3_sc20	4.84
										GW16_PFC1_A3_sc21	Stem cells	GW16_PFC1_A3_sc21	8.38
										GW16_PFC1_A3_sc22	Neurons	GW16_PFC1_A3_sc22	0
										GW16_PFC1_A3_sc23	GABAergic neurons	GW16_PFC1_A3_sc23	0
										GW16_PFC1_A3_sc24	Stem cells	GW16_PFC1_A3_sc24	3.82
										GW16_PFC1_A2_sc1	Neurons	GW16_PFC1_A2_sc1	64.31
										GW16_PFC1_A2_sc2	Neurons	GW16_PFC1_A2_sc2	342.91
										GW16_PFC1_A2_sc3	Neurons	GW16_PFC1_A2_sc3	0
										GW16_PFC1_A2_sc4	GABAergic neurons	GW16_PFC1_A2_sc4	7.18
										GW16_PFC1_A2_sc5	Neurons	GW16_PFC1_A2_sc5	0
										GW16_PFC1_A2_sc6	Neurons	GW16_PFC1_A2_sc6	27.93
										GW16_PFC1_A2_sc7	GABAergic neurons	GW16_PFC1_A2_sc7	12.92
										GW16_PFC1_A2_sc8	GABAergic neurons	GW16_PFC1_A2_sc8	6.38
										GW16_PFC1_A2_sc9	Neurons	GW16_PFC1_A2_sc9	0
										GW16_PFC1_A2_sc10	Neurons	GW16_PFC1_A2_sc10	12.51
										GW16_PFC1_A2_sc12	GABAergic neurons	GW16_PFC1_A2_sc12	0
										GW16_PFC1_A2_sc13	GABAergic neurons	GW16_PFC1_A2_sc13	0
										GW16_PFC1_A2_sc14	Neurons	GW16_PFC1_A2_sc14	3.84
										GW16_PFC1_A2_sc15	Neurons	GW16_PFC1_A2_sc15	5.54
										GW16_PFC1_A2_sc16	Neurons	GW16_PFC1_A2_sc16	0
										GW16_PFC1_E4_sc1	Neurons	GW16_PFC1_E4_sc1	246.25
										GW16_PFC1_E4_sc2	Neurons	GW16_PFC1_E4_sc2	0
										GW16_PFC1_E4_sc3	Neurons	GW16_PFC1_E4_sc3	5.42
										GW16_PFC1_E4_sc4	GABAergic neurons	GW16_PFC1_E4_sc4	0
										GW16_PFC1_E4_sc5	Neurons	GW16_PFC1_E4_sc5	57.29
										GW16_PFC1_E4_sc6	Neurons	GW16_PFC1_E4_sc6	56.13
										GW16_PFC1_E4_sc7	Neurons	GW16_PFC1_E4_sc7	63.16
										GW16_PFC1_E4_sc8	Neurons	GW16_PFC1_E4_sc8	80.8
										GW16_PFC1_E4_sc9	Neurons	GW16_PFC1_E4_sc9	140.82
										GW16_PFC1_E4_sc10	Neurons	GW16_PFC1_E4_sc10	82.82
										GW16_PFC1_E4_sc11	OPC	GW16_PFC1_E4_sc11	37.09
										GW16_PFC1_E4_sc13	Neurons	GW16_PFC1_E4_sc13	102.56
										GW16_PFC1_E4_sc14	Neurons	GW16_PFC1_E4_sc14	18.33
										GW16_PFC1_E4_sc15	GABAergic neurons	GW16_PFC1_E4_sc15	11.18
										GW16_PFC1_E4_sc16	Neurons	GW16_PFC1_E4_sc16	13.04
										GW16_PFC1_E4_sc17	Neurons	GW16_PFC1_E4_sc17	60.04
										GW16_PFC1_E4_sc18	Neurons	GW16_PFC1_E4_sc18	13.04
										GW16_PFC1_E4_sc19	Neurons	GW16_PFC1_E4_sc19	18.92
										GW16_PFC1_E4_sc20	Neurons	GW16_PFC1_E4_sc20	11.04
										GW16_PFC1_E4_sc21	Neurons	GW16_PFC1_E4_sc21	0
										GW16_PFC1_E4_sc22	Neurons	GW16_PFC1_E4_sc22	63.07
										GW16_PFC1_E4_sc23	GABAergic neurons	GW16_PFC1_E4_sc23	0
										GW16_PFC1_E4_sc24	Neurons	GW16_PFC1_E4_sc24	17.81
										GW16_PFC1_E3_sc1	Neurons	GW16_PFC1_E3_sc1	136.9
										GW16_PFC1_E3_sc2	Neurons	GW16_PFC1_E3_sc2	15.57
										GW16_PFC1_E3_sc3	Neurons	GW16_PFC1_E3_sc3	0
										GW16_PFC1_E3_sc4	Neurons	GW16_PFC1_E3_sc4	34.76
										GW16_PFC1_E3_sc5	Neurons	GW16_PFC1_E3_sc5	3.73
										GW16_PFC1_E3_sc6	GABAergic neurons	GW16_PFC1_E3_sc6	42.89
										GW16_PFC1_E3_sc7	Neurons	GW16_PFC1_E3_sc7	267.54
										GW16_PFC1_E3_sc8	Neurons	GW16_PFC1_E3_sc8	78.82
										GW16_PFC1_E3_sc9	GABAergic neurons	GW16_PFC1_E3_sc9	140.92
										GW16_PFC1_E3_sc10	Neurons	GW16_PFC1_E3_sc10	0
										GW16_PFC1_E3_sc11	Neurons	GW16_PFC1_E3_sc11	100.97
										GW16_PFC1_E3_sc12	Neurons	GW16_PFC1_E3_sc12	6.47
										GW16_PFC1_E3_sc13	GABAergic neurons	GW16_PFC1_E3_sc13	37.18
										GW16_PFC1_E3_sc14	Stem cells	GW16_PFC1_E3_sc14	8.04
										GW16_PFC1_E3_sc15	Neurons	GW16_PFC1_E3_sc15	85.15
										GW16_PFC1_E3_sc16	Neurons	GW16_PFC1_E3_sc16	9.68
										GW16_PFC1_E3_sc17	GABAergic neurons	GW16_PFC1_E3_sc17	252.17
										GW16_PFC1_E3_sc18	Neurons	GW16_PFC1_E3_sc18	439.63
										GW16_PFC1_E3_sc19	Neurons	GW16_PFC1_E3_sc19	0
										GW16_PFC1_E3_sc20	Neurons	GW16_PFC1_E3_sc20	16.1
										GW16_PFC1_E3_sc21	Stem cells	GW16_PFC1_E3_sc21	9.19
										GW16_PFC1_E3_sc22	Neurons	GW16_PFC1_E3_sc22	3.8
										GW16_PFC1_E3_sc23	OPC	GW16_PFC1_E3_sc23	61.37
										GW16_PFC1_E3_sc24	Stem cells	GW16_PFC1_E3_sc24	99.35
										GW16_PFC1_E2_sc1	Neurons	GW16_PFC1_E2_sc1	10.72
										GW16_PFC1_E2_sc2	Neurons	GW16_PFC1_E2_sc2	238.69
										GW16_PFC1_E2_sc3	Neurons	GW16_PFC1_E2_sc3	29.15
										GW16_PFC1_E2_sc4	Neurons	GW16_PFC1_E2_sc4	283.23
										GW16_PFC1_E2_sc5	Neurons	GW16_PFC1_E2_sc5	1607.56
										GW16_PFC1_E2_sc6	Neurons	GW16_PFC1_E2_sc6	17.3
										GW16_PFC1_E2_sc7	Neurons	GW16_PFC1_E2_sc7	262.56
										GW16_PFC1_E2_sc8	Neurons	GW16_PFC1_E2_sc8	36.08
										GW16_PFC1_E2_sc9	GABAergic neurons	GW16_PFC1_E2_sc9	0
										GW16_PFC1_E2_sc10	GABAergic neurons	GW16_PFC1_E2_sc10	0
										GW16_PFC1_E2_sc11	Neurons	GW16_PFC1_E2_sc11	25.01
										GW16_PFC1_E2_sc12	Neurons	GW16_PFC1_E2_sc12	198.65
										GW16_PFC1_E2_sc13	Neurons	GW16_PFC1_E2_sc13	333.27
										GW16_PFC1_E2_sc14	Neurons	GW16_PFC1_E2_sc14	179.12
										GW16_PFC1_E2_sc15	Stem cells	GW16_PFC1_E2_sc15	143.52
										GW16_PFC1_E2_sc16	Neurons	GW16_PFC1_E2_sc16	6.69
										GW16_PFC1_E2_sc17	Neurons	GW16_PFC1_E2_sc17	664.04
										GW16_PFC1_E2_sc18	Neurons	GW16_PFC1_E2_sc18	0
										GW16_PFC1_E2_sc19	Neurons	GW16_PFC1_E2_sc19	0
										GW16_PFC1_E2_sc20	Neurons	GW16_PFC1_E2_sc20	282.37
										GW16_PFC1_E2_sc21	Neurons	GW16_PFC1_E2_sc21	6.11
										GW16_PFC1_E2_sc22	Neurons	GW16_PFC1_E2_sc22	11.54
										GW16_PFC1_E2_sc23	Stem cells	GW16_PFC1_E2_sc23	97.84
										GW16_PFC1_E2_sc24	Neurons	GW16_PFC1_E2_sc24	28
										GW16_PFC1_L4_sc1	OPC	GW16_PFC1_L4_sc1	27.93
										GW16_PFC1_L4_sc2	Neurons	GW16_PFC1_L4_sc2	0
										GW16_PFC1_L4_sc3	Neurons	GW16_PFC1_L4_sc3	285.75
										GW16_PFC1_L4_sc4	Stem cells	GW16_PFC1_L4_sc4	7.47
										GW16_PFC1_L4_sc5	Neurons	GW16_PFC1_L4_sc5	311.77
										GW16_PFC1_L4_sc6	Neurons	GW16_PFC1_L4_sc6	0
										GW16_PFC1_L4_sc7	Neurons	GW16_PFC1_L4_sc7	3.53
										GW16_PFC1_L4_sc8	Neurons	GW16_PFC1_L4_sc8	0
										GW16_PFC1_L4_sc9	Neurons	GW16_PFC1_L4_sc9	3.39
										GW16_PFC1_L4_sc10	Neurons	GW16_PFC1_L4_sc10	0
										GW16_PFC1_L4_sc11	Neurons	GW16_PFC1_L4_sc11	22.34
										GW16_PFC1_L4_sc12	Stem cells	GW16_PFC1_L4_sc12	0
										GW16_PFC1_L4_sc13	Neurons	GW16_PFC1_L4_sc13	49.69
										GW16_PFC1_L4_sc14	Stem cells	GW16_PFC1_L4_sc14	22.51
										GW16_PFC1_L4_sc15	Neurons	GW16_PFC1_L4_sc15	161.21
										GW16_PFC1_L4_sc16	Neurons	GW16_PFC1_L4_sc16	69.05
										GW16_PFC1_D3_sc1	Neurons	GW16_PFC1_D3_sc1	18.57
										GW16_PFC1_D3_sc2	Neurons	GW16_PFC1_D3_sc2	209.61
										GW16_PFC1_D3_sc3	Neurons	GW16_PFC1_D3_sc3	9.07
										GW16_PFC1_D3_sc4	Stem cells	GW16_PFC1_D3_sc4	0
										GW16_PFC1_D3_sc5	Neurons	GW16_PFC1_D3_sc5	62.99
										GW16_PFC1_D3_sc6	Neurons	GW16_PFC1_D3_sc6	0
										GW16_PFC1_D3_sc7	Neurons	GW16_PFC1_D3_sc7	117.94
										GW16_PFC1_D3_sc8	Stem cells	GW16_PFC1_D3_sc8	23.15
										GW16_PFC1_D3_sc9	Neurons	GW16_PFC1_D3_sc9	2.49
										GW16_PFC1_D3_sc10	Neurons	GW16_PFC1_D3_sc10	0
										GW16_PFC1_D3_sc11	Neurons	GW16_PFC1_D3_sc11	7.3
										GW16_PFC1_D3_sc12	Neurons	GW16_PFC1_D3_sc12	9.74
										GW16_PFC1_D3_sc13	Neurons	GW16_PFC1_D3_sc13	74.19
										GW16_PFC1_D3_sc14	Stem cells	GW16_PFC1_D3_sc14	82.43
										GW16_PFC1_D3_sc15	Neurons	GW16_PFC1_D3_sc15	17.25
										GW16_PFC1_D3_sc16	Stem cells	GW16_PFC1_D3_sc16	277.44
										GW16_PFC1_D3_sc17	Neurons	GW16_PFC1_D3_sc17	0
										GW16_PFC1_D3_sc18	Neurons	GW16_PFC1_D3_sc18	0
										GW16_PFC1_D3_sc19	Neurons	GW16_PFC1_D3_sc19	0
										GW16_PFC1_D3_sc20	Neurons	GW16_PFC1_D3_sc20	0
										GW16_PFC1_D3_sc21	Neurons	GW16_PFC1_D3_sc21	0
										GW16_PFC1_D3_sc22	OPC	GW16_PFC1_D3_sc22	9.6
										GW16_PFC1_D3_sc23	Neurons	GW16_PFC1_D3_sc23	180.93
										GW16_PFC1_D3_sc24	Neurons	GW16_PFC1_D3_sc24	326.64
										GW16_PFC1_D4_sc2	OPC	GW16_PFC1_D4_sc2	10.56
										GW16_PFC1_D4_sc3	Neurons	GW16_PFC1_D4_sc3	0
										GW16_PFC1_D4_sc4	Neurons	GW16_PFC1_D4_sc4	31.18
										GW16_PFC1_D4_sc5	Neurons	GW16_PFC1_D4_sc5	6.36
										GW16_PFC1_D4_sc6	Neurons	GW16_PFC1_D4_sc6	39.13
										GW16_PFC1_D4_sc7	Neurons	GW16_PFC1_D4_sc7	19.57
										GW16_PFC1_D4_sc8	Neurons	GW16_PFC1_D4_sc8	76.77
										GW16_PFC1_D4_sc9	Neurons	GW16_PFC1_D4_sc9	0
										GW16_PFC1_D4_sc10	Neurons	GW16_PFC1_D4_sc10	0
										GW16_PFC1_D4_sc11	Stem cells	GW16_PFC1_D4_sc11	112.53
										GW16_PFC1_D4_sc12	Neurons	GW16_PFC1_D4_sc12	51.96
										GW16_PFC1_D4_sc13	Neurons	GW16_PFC1_D4_sc13	178.52
										GW16_PFC1_D4_sc14	GABAergic neurons	GW16_PFC1_D4_sc14	0
										GW16_PFC1_D4_sc15	Stem cells	GW16_PFC1_D4_sc15	139.12
										GW16_PFC1_D4_sc16	Neurons	GW16_PFC1_D4_sc16	0
										GW16_PFC1_D4_sc18	Neurons	GW16_PFC1_D4_sc18	6.44
										GW16_PFC1_D4_sc19	OPC	GW16_PFC1_D4_sc19	0
										GW16_PFC1_D4_sc20	Neurons	GW16_PFC1_D4_sc20	471.5
										GW16_PFC1_D4_sc21	Neurons	GW16_PFC1_D4_sc21	10.23
										GW16_PFC1_D4_sc22	Neurons	GW16_PFC1_D4_sc22	25.09
										GW16_PFC1_D4_sc23	Stem cells	GW16_PFC1_D4_sc23	0
										GW16_PFC1_D4_sc24	Stem cells	GW16_PFC1_D4_sc24	12.76
										GW16_PFC1_VL2_sc1	GABAergic neurons	GW16_PFC1_VL2_sc1	12.12
										GW16_PFC1_VL2_sc2	OPC	GW16_PFC1_VL2_sc2	0
										GW16_PFC1_VL2_sc3	Neurons	GW16_PFC1_VL2_sc3	0
										GW16_PFC1_VL2_sc4	GABAergic neurons	GW16_PFC1_VL2_sc4	0
										GW16_PFC1_VL2_sc5	Neurons	GW16_PFC1_VL2_sc5	335.32
										GW16_PFC1_VL2_sc6	Stem cells	GW16_PFC1_VL2_sc6	15.01
										GW16_PFC1_VL2_sc7	Neurons	GW16_PFC1_VL2_sc7	4.84
										GW16_PFC1_VL2_sc8	Neurons	GW16_PFC1_VL2_sc8	591.92
										GW16_PFC1_VL2_sc9	Stem cells	GW16_PFC1_VL2_sc9	0
										GW16_PFC1_VL2_sc10	GABAergic neurons	GW16_PFC1_VL2_sc10	0
										GW16_PFC1_VL2_sc12	GABAergic neurons	GW16_PFC1_VL2_sc12	0
										GW16_PFC1_VL2_sc13	Stem cells	GW16_PFC1_VL2_sc13	0
										GW16_PFC1_VL2_sc14	Neurons	GW16_PFC1_VL2_sc14	0
										GW16_PFC1_VL2_sc15	GABAergic neurons	GW16_PFC1_VL2_sc15	0
										GW16_PFC1_VL2_sc16	Neurons	GW16_PFC1_VL2_sc16	6.78
										GW16_PFC1_VL2_sc17	Neurons	GW16_PFC1_VL2_sc17	160.34
										GW16_PFC1_VL2_sc18	Neurons	GW16_PFC1_VL2_sc18	8.35
										GW16_PFC1_VL2_sc19	GABAergic neurons	GW16_PFC1_VL2_sc19	73.52
										GW16_PFC1_VL2_sc20	Neurons	GW16_PFC1_VL2_sc20	233.75
										GW16_PFC1_VL2_sc21	Neurons	GW16_PFC1_VL2_sc21	9.88
										GW16_PFC1_VL2_sc22	Neurons	GW16_PFC1_VL2_sc22	0
										GW16_PFC1_VL2_sc23	Neurons	GW16_PFC1_VL2_sc23	219.31
										GW16_PFC1_VL2_sc24	GABAergic neurons	GW16_PFC1_VL2_sc24	13.49
										GW16_PFC1_VL3_sc1	Neurons	GW16_PFC1_VL3_sc1	56.07
										GW16_PFC1_VL3_sc2	Neurons	GW16_PFC1_VL3_sc2	283.54
										GW16_PFC1_VL3_sc3	Neurons	GW16_PFC1_VL3_sc3	0
										GW16_PFC1_VL3_sc4	Neurons	GW16_PFC1_VL3_sc4	89.57
										GW16_PFC1_VL3_sc5	Neurons	GW16_PFC1_VL3_sc5	6.72
										GW16_PFC1_VL3_sc6	Neurons	GW16_PFC1_VL3_sc6	0
										GW16_PFC1_VL3_sc7	Neurons	GW16_PFC1_VL3_sc7	147.27
										GW16_PFC1_VL3_sc8	Neurons	GW16_PFC1_VL3_sc8	329.6
										GW16_PFC1_VL3_sc9	Neurons	GW16_PFC1_VL3_sc9	0
										GW16_PFC1_VL3_sc10	Neurons	GW16_PFC1_VL3_sc10	6.99
										GW16_PFC1_VL3_sc11	Neurons	GW16_PFC1_VL3_sc11	44.22
										GW16_PFC1_VL3_sc12	Stem cells	GW16_PFC1_VL3_sc12	0
										GW16_PFC1_VL3_sc13	Neurons	GW16_PFC1_VL3_sc13	4.04
										GW16_PFC1_VL3_sc14	Neurons	GW16_PFC1_VL3_sc14	0
										GW16_PFC1_VL3_sc15	Neurons	GW16_PFC1_VL3_sc15	122.79
										GW16_PFC1_VL3_sc16	Neurons	GW16_PFC1_VL3_sc16	2.88
										GW16_PFC1_F3_sc1	Neurons	GW16_PFC1_F3_sc1	91.39
										GW16_PFC1_F3_sc2	Neurons	GW16_PFC1_F3_sc2	50.27
										GW16_PFC1_F3_sc3	Neurons	GW16_PFC1_F3_sc3	184.63
										GW16_PFC1_F3_sc5	Neurons	GW16_PFC1_F3_sc5	0
										GW16_PFC1_F3_sc6	Neurons	GW16_PFC1_F3_sc6	11.86
										GW16_PFC1_F3_sc7	Neurons	GW16_PFC1_F3_sc7	143.8
										GW16_PFC1_F3_sc8	OPC	GW16_PFC1_F3_sc8	5.39
										GW16_PFC1_F3_sc9	Neurons	GW16_PFC1_F3_sc9	4.82
										GW16_PFC1_F3_sc10	Neurons	GW16_PFC1_F3_sc10	2.31
										GW16_PFC1_F3_sc11	Neurons	GW16_PFC1_F3_sc11	0
										GW16_PFC1_F3_sc12	Neurons	GW16_PFC1_F3_sc12	14.82
										GW16_PFC1_F3_sc13	Neurons	GW16_PFC1_F3_sc13	5.85
										GW16_PFC1_F3_sc14	Stem cells	GW16_PFC1_F3_sc14	0
										GW16_PFC1_F3_sc15	Neurons	GW16_PFC1_F3_sc15	71.86
										GW16_PFC1_F3_sc16	Stem cells	GW16_PFC1_F3_sc16	0
										GW16_PFC1_F3_sc17	Neurons	GW16_PFC1_F3_sc17	14.29
										GW16_PFC1_F3_sc18	Neurons	GW16_PFC1_F3_sc18	97.6
										GW16_PFC1_F3_sc19	Neurons	GW16_PFC1_F3_sc19	313.13
										GW16_PFC1_F3_sc20	Neurons	GW16_PFC1_F3_sc20	0
										GW16_PFC1_F3_sc21	Neurons	GW16_PFC1_F3_sc21	9.56
										GW16_PFC1_F3_sc22	Neurons	GW16_PFC1_F3_sc22	0
										GW16_PFC1_F3_sc23	Stem cells	GW16_PFC1_F3_sc23	0
										GW16_PFC1_F3_sc24	Neurons	GW16_PFC1_F3_sc24	0
										GW16_PFC1_F4_sc1	Neurons	GW16_PFC1_F4_sc1	0
										GW16_PFC1_F4_sc2	Stem cells	GW16_PFC1_F4_sc2	0
										GW16_PFC1_F4_sc3	Neurons	GW16_PFC1_F4_sc3	0
										GW16_PFC1_F4_sc4	Neurons	GW16_PFC1_F4_sc4	7.01
										GW16_PFC1_F4_sc5	Neurons	GW16_PFC1_F4_sc5	255.45
										GW16_PFC1_F4_sc6	Neurons	GW16_PFC1_F4_sc6	0
										GW16_PFC1_F4_sc7	Neurons	GW16_PFC1_F4_sc7	12.13
										GW16_PFC1_F4_sc8	Stem cells	GW16_PFC1_F4_sc8	5.18
										GW16_PFC1_F4_sc9	Neurons	GW16_PFC1_F4_sc9	73.39
										GW16_PFC1_F4_sc10	Neurons	GW16_PFC1_F4_sc10	0
										GW16_PFC1_F4_sc11	Stem cells	GW16_PFC1_F4_sc11	0
										GW16_PFC1_F4_sc12	Stem cells	GW16_PFC1_F4_sc12	8.78
										GW16_PFC1_F4_sc13	Neurons	GW16_PFC1_F4_sc13	120.31
										GW16_PFC1_F4_sc14	Neurons	GW16_PFC1_F4_sc14	39.59
										GW16_PFC1_F4_sc15	Neurons	GW16_PFC1_F4_sc15	0
										GW16_PFC1_F4_sc16	Neurons	GW16_PFC1_F4_sc16	0
										GW16_PFC1_F4_sc17	Stem cells	GW16_PFC1_F4_sc17	109.51
										GW16_PFC1_F4_sc18	Neurons	GW16_PFC1_F4_sc18	0
										GW16_PFC1_F4_sc19	Neurons	GW16_PFC1_F4_sc19	0
										GW16_PFC1_F4_sc20	Neurons	GW16_PFC1_F4_sc20	17.15
										GW16_PFC1_F4_sc21	Neurons	GW16_PFC1_F4_sc21	8.67
										GW16_PFC1_F4_sc22	Neurons	GW16_PFC1_F4_sc22	11.06
										GW16_PFC1_F4_sc23	GABAergic neurons	GW16_PFC1_F4_sc23	8.91
										GW16_PFC1_F4_sc24	Neurons	GW16_PFC1_F4_sc24	202.52
										GW16_PFC1_F1_sc1	Neurons	GW16_PFC1_F1_sc1	118.92
										GW16_PFC1_F1_sc2	Neurons	GW16_PFC1_F1_sc2	0
										GW16_PFC1_F1_sc3	Neurons	GW16_PFC1_F1_sc3	158.9
										GW16_PFC1_F1_sc4	Neurons	GW16_PFC1_F1_sc4	294.25
										GW16_PFC1_F1_sc5	Neurons	GW16_PFC1_F1_sc5	424.48
										GW16_PFC1_F1_sc6	Neurons	GW16_PFC1_F1_sc6	43.1
										GW16_PFC1_F1_sc7	Neurons	GW16_PFC1_F1_sc7	0
										GW16_PFC1_F1_sc8	Neurons	GW16_PFC1_F1_sc8	3.24
										GW16_PFC1_F1_sc9	Neurons	GW16_PFC1_F1_sc9	2.97
										GW16_PFC1_F1_sc10	Neurons	GW16_PFC1_F1_sc10	0
										GW16_PFC1_F1_sc11	Neurons	GW16_PFC1_F1_sc11	524.38
										GW16_PFC1_F1_sc12	Neurons	GW16_PFC1_F1_sc12	8.08
										GW16_PFC1_F1_sc13	GABAergic neurons	GW16_PFC1_F1_sc13	0
										GW16_PFC1_F1_sc14	GABAergic neurons	GW16_PFC1_F1_sc14	0
										GW16_PFC1_F1_sc15	Neurons	GW16_PFC1_F1_sc15	0
										GW16_PFC1_F1_sc16	Stem cells	GW16_PFC1_F1_sc16	290.96
										GW16_PFC1_F1_sc17	GABAergic neurons	GW16_PFC1_F1_sc17	250.44
										GW16_PFC1_F1_sc18	Neurons	GW16_PFC1_F1_sc18	3.14
										GW16_PFC1_F1_sc19	GABAergic neurons	GW16_PFC1_F1_sc19	0
										GW16_PFC1_F1_sc20	Neurons	GW16_PFC1_F1_sc20	15.49
										GW16_PFC1_F1_sc21	Neurons	GW16_PFC1_F1_sc21	0
										GW16_PFC1_F1_sc22	Neurons	GW16_PFC1_F1_sc22	0
										GW16_PFC1_F1_sc23	Neurons	GW16_PFC1_F1_sc23	0
										GW16_PFC1_F1_sc24	Neurons	GW16_PFC1_F1_sc24	197.02
										GW16_PFC1_A4_sc1	Neurons	GW16_PFC1_A4_sc1	7.52
										GW16_PFC1_A4_sc2	Stem cells	GW16_PFC1_A4_sc2	159.29
										GW16_PFC1_A4_sc3	Neurons	GW16_PFC1_A4_sc3	5.92
										GW16_PFC1_A4_sc4	Neurons	GW16_PFC1_A4_sc4	325.86
										GW16_PFC1_A4_sc5	Neurons	GW16_PFC1_A4_sc5	7.99
										GW16_PFC1_A4_sc6	Stem cells	GW16_PFC1_A4_sc6	3.37
										GW16_PFC1_A4_sc7	Neurons	GW16_PFC1_A4_sc7	11.09
										GW16_PFC1_A4_sc8	Stem cells	GW16_PFC1_A4_sc8	0
										GW16_PFC1_A4_sc9	Stem cells	GW16_PFC1_A4_sc9	3.18
										GW16_PFC1_A4_sc10	Stem cells	GW16_PFC1_A4_sc10	5.17
										GW16_PFC1_A4_sc11	GABAergic neurons	GW16_PFC1_A4_sc11	0
										GW16_PFC1_A4_sc12	Neurons	GW16_PFC1_A4_sc12	0
										GW16_PFC1_A4_sc13	Neurons	GW16_PFC1_A4_sc13	3.7
										GW16_PFC1_A4_sc15	Neurons	GW16_PFC1_A4_sc15	6.27
										GW16_PFC1_A4_sc16	Neurons	GW16_PFC1_A4_sc16	0
										GW16_PFC1_C4_sc1	Neurons	GW16_PFC1_C4_sc1	10.47
										GW16_PFC1_C4_sc2	GABAergic neurons	GW16_PFC1_C4_sc2	507.5
										GW16_PFC1_C4_sc3	Neurons	GW16_PFC1_C4_sc3	307.07
										GW16_PFC1_C4_sc4	Neurons	GW16_PFC1_C4_sc4	14.48
										GW16_PFC1_C4_sc5	Neurons	GW16_PFC1_C4_sc5	12.31
										GW16_PFC1_C4_sc6	GABAergic neurons	GW16_PFC1_C4_sc6	352.23
										GW16_PFC1_C4_sc7	Neurons	GW16_PFC1_C4_sc7	10.12
										GW16_PFC1_C4_sc8	Neurons	GW16_PFC1_C4_sc8	126.63
										GW16_PFC1_C4_sc9	GABAergic neurons	GW16_PFC1_C4_sc9	4.74
										GW16_PFC1_C4_sc10	Neurons	GW16_PFC1_C4_sc10	5.4
										GW16_PFC1_C4_sc11	Neurons	GW16_PFC1_C4_sc11	183.71
										GW16_PFC1_C4_sc12	Neurons	GW16_PFC1_C4_sc12	14.07
										GW16_PFC1_C4_sc13	Stem cells	GW16_PFC1_C4_sc13	215.14
										GW16_PFC1_C4_sc14	Neurons	GW16_PFC1_C4_sc14	862.52
										GW16_PFC1_C4_sc15	GABAergic neurons	GW16_PFC1_C4_sc15	24.06
										GW16_PFC1_C4_sc16	GABAergic neurons	GW16_PFC1_C4_sc16	0
										GW16_PFC1_C4_sc17	Neurons	GW16_PFC1_C4_sc17	0
										GW16_PFC1_C4_sc18	Neurons	GW16_PFC1_C4_sc18	29.82
										GW16_PFC1_C4_sc19	GABAergic neurons	GW16_PFC1_C4_sc19	0
										GW16_PFC1_C4_sc21	OPC	GW16_PFC1_C4_sc21	69.72
										GW16_PFC1_C4_sc22	GABAergic neurons	GW16_PFC1_C4_sc22	0
										GW16_PFC1_C4_sc23	Neurons	GW16_PFC1_C4_sc23	85.8
										GW16_PFC1_C4_sc24	Neurons	GW16_PFC1_C4_sc24	0
										GW16_PFC1_DL1_sc1	GABAergic neurons	GW16_PFC1_DL1_sc1	7.91
										GW16_PFC1_DL1_sc2	Stem cells	GW16_PFC1_DL1_sc2	4.94
										GW16_PFC1_DL1_sc3	Stem cells	GW16_PFC1_DL1_sc3	131.23
										GW16_PFC1_DL1_sc4	Neurons	GW16_PFC1_DL1_sc4	18.02
										GW16_PFC1_DL1_sc5	GABAergic neurons	GW16_PFC1_DL1_sc5	315.79
										GW16_PFC1_DL1_sc6	Neurons	GW16_PFC1_DL1_sc6	17.12
										GW16_PFC1_DL1_sc7	Stem cells	GW16_PFC1_DL1_sc7	22.68
										GW16_PFC1_DL1_sc8	Neurons	GW16_PFC1_DL1_sc8	0
										GW16_PFC1_DL1_sc9	Stem cells	GW16_PFC1_DL1_sc9	2.19
										GW16_PFC1_DL1_sc10	GABAergic neurons	GW16_PFC1_DL1_sc10	0
										GW16_PFC1_DL1_sc11	Neurons	GW16_PFC1_DL1_sc11	0
										GW16_PFC1_DL1_sc12	Neurons	GW16_PFC1_DL1_sc12	535.49
										GW16_PFC1_DL1_sc13	Neurons	GW16_PFC1_DL1_sc13	6.31
										GW16_PFC1_DL1_sc14	Neurons	GW16_PFC1_DL1_sc14	0
										GW16_PFC1_DL1_sc15	GABAergic neurons	GW16_PFC1_DL1_sc15	472.59
										GW16_PFC1_DL1_sc16	Neurons	GW16_PFC1_DL1_sc16	11.87
										GW16_PFC1_DL1_sc17	Stem cells	GW16_PFC1_DL1_sc17	8.49
										GW16_PFC1_DL1_sc18	Stem cells	GW16_PFC1_DL1_sc18	4.21
										GW16_PFC1_DL1_sc19	Stem cells	GW16_PFC1_DL1_sc19	103.97
										GW16_PFC1_DL1_sc20	Stem cells	GW16_PFC1_DL1_sc20	17.68
										GW16_PFC1_DL1_sc21	Neurons	GW16_PFC1_DL1_sc21	7.86
										GW16_PFC1_DL1_sc22	Stem cells	GW16_PFC1_DL1_sc22	2.56
										GW16_PFC1_DL1_sc23	Neurons	GW16_PFC1_DL1_sc23	12.19
										GW16_PFC1_DL1_sc24	Neurons	GW16_PFC1_DL1_sc24	85.92
										GW16_PFC1_C1_sc1	Neurons	GW16_PFC1_C1_sc1	11.15
										GW16_PFC1_C1_sc2	Neurons	GW16_PFC1_C1_sc2	0
										GW16_PFC1_C1_sc3	Neurons	GW16_PFC1_C1_sc3	525.21
										GW16_PFC1_C1_sc4	Neurons	GW16_PFC1_C1_sc4	0
										GW16_PFC1_C1_sc5	Neurons	GW16_PFC1_C1_sc5	102.16
										GW16_PFC1_C1_sc6	Neurons	GW16_PFC1_C1_sc6	353.67
										GW16_PFC1_C1_sc7	GABAergic neurons	GW16_PFC1_C1_sc7	132.66
										GW16_PFC1_C1_sc8	Stem cells	GW16_PFC1_C1_sc8	5.95
										GW16_PFC1_C1_sc9	Neurons	GW16_PFC1_C1_sc9	19.22
										GW16_PFC1_C1_sc10	Neurons	GW16_PFC1_C1_sc10	0
										GW16_PFC1_C1_sc11	Neurons	GW16_PFC1_C1_sc11	0
										GW16_PFC1_C1_sc13	Neurons	GW16_PFC1_C1_sc13	20.22
										GW16_PFC1_C1_sc14	Neurons	GW16_PFC1_C1_sc14	140.26
										GW16_PFC1_C1_sc15	Neurons	GW16_PFC1_C1_sc15	208.58
										GW16_PFC1_C1_sc16	Neurons	GW16_PFC1_C1_sc16	62.8
										GW16_PFC1_C1_sc17	Neurons	GW16_PFC1_C1_sc17	8.49
										GW16_PFC1_C1_sc18	GABAergic neurons	GW16_PFC1_C1_sc18	52.89
										GW16_PFC1_C1_sc19	Stem cells	GW16_PFC1_C1_sc19	2.25
										GW16_PFC1_C1_sc20	Neurons	GW16_PFC1_C1_sc20	162.54
										GW16_PFC1_C1_sc21	Stem cells	GW16_PFC1_C1_sc21	176.47
										GW16_PFC1_C1_sc22	GABAergic neurons	GW16_PFC1_C1_sc22	320.76
										GW16_PFC1_C1_sc23	Stem cells	GW16_PFC1_C1_sc23	264.44
										GW16_PFC1_C1_sc24	Neurons	GW16_PFC1_C1_sc24	0
										GW16_PFC1_C3_sc1	Neurons	GW16_PFC1_C3_sc1	243.54
										GW16_PFC1_C3_sc2	Stem cells	GW16_PFC1_C3_sc2	376.04
										GW16_PFC1_C3_sc3	Neurons	GW16_PFC1_C3_sc3	0
										GW16_PFC1_C3_sc4	Stem cells	GW16_PFC1_C3_sc4	66.1
										GW16_PFC1_C3_sc5	Neurons	GW16_PFC1_C3_sc5	0
										GW16_PFC1_C3_sc6	Neurons	GW16_PFC1_C3_sc6	0
										GW16_PFC1_C3_sc7	Neurons	GW16_PFC1_C3_sc7	62.56
										GW16_PFC1_C3_sc8	Neurons	GW16_PFC1_C3_sc8	71.23
										GW16_PFC1_C3_sc9	Neurons	GW16_PFC1_C3_sc9	0
										GW16_PFC1_C3_sc10	Stem cells	GW16_PFC1_C3_sc10	0
										GW16_PFC1_C3_sc11	Neurons	GW16_PFC1_C3_sc11	256.17
										GW16_PFC1_C3_sc12	Neurons	GW16_PFC1_C3_sc12	0
										GW16_PFC1_C3_sc13	GABAergic neurons	GW16_PFC1_C3_sc13	179.7
										GW16_PFC1_C3_sc14	Neurons	GW16_PFC1_C3_sc14	0
										GW16_PFC1_C3_sc15	Neurons	GW16_PFC1_C3_sc15	12.12
										GW16_PFC1_C3_sc16	Neurons	GW16_PFC1_C3_sc16	11.7
										GW16_PFC1_L1_sc1	Neurons	GW16_PFC1_L1_sc1	79.48
										GW16_PFC1_L1_sc2	Neurons	GW16_PFC1_L1_sc2	0
										GW16_PFC1_L1_sc3	Stem cells	GW16_PFC1_L1_sc3	19.39
										GW16_PFC1_L1_sc4	Neurons	GW16_PFC1_L1_sc4	0
										GW16_PFC1_L1_sc5	Stem cells	GW16_PFC1_L1_sc5	0
										GW16_PFC1_L1_sc6	Neurons	GW16_PFC1_L1_sc6	0
										GW16_PFC1_L1_sc7	Stem cells	GW16_PFC1_L1_sc7	0
										GW16_PFC1_L1_sc8	Stem cells	GW16_PFC1_L1_sc8	7.69
										GW16_PFC1_L1_sc9	Stem cells	GW16_PFC1_L1_sc9	0
										GW16_PFC1_L1_sc10	Stem cells	GW16_PFC1_L1_sc10	294.41
										GW16_PFC1_L1_sc11	Neurons	GW16_PFC1_L1_sc11	107.56
										GW16_PFC1_L1_sc12	Neurons	GW16_PFC1_L1_sc12	0
										GW16_PFC1_L1_sc13	Neurons	GW16_PFC1_L1_sc13	292.17
										GW16_PFC1_L1_sc14	Neurons	GW16_PFC1_L1_sc14	1095.84
										GW16_PFC1_L1_sc15	Neurons	GW16_PFC1_L1_sc15	115.83
										GW16_PFC1_L1_sc16	Neurons	GW16_PFC1_L1_sc16	5.46
										GW16_PFC1_L1_sc17	Neurons	GW16_PFC1_L1_sc17	107.33
										GW16_PFC1_L1_sc18	Stem cells	GW16_PFC1_L1_sc18	38.73
										GW16_PFC1_L1_sc19	OPC	GW16_PFC1_L1_sc19	87.72
										GW16_PFC1_L1_sc20	Neurons	GW16_PFC1_L1_sc20	0
										GW16_PFC1_L1_sc21	Stem cells	GW16_PFC1_L1_sc21	13.18
										GW16_PFC1_L1_sc22	Stem cells	GW16_PFC1_L1_sc22	7.43
										GW16_PFC1_L1_sc23	Neurons	GW16_PFC1_L1_sc23	191.47
										GW16_PFC1_L1_sc24	Neurons	GW16_PFC1_L1_sc24	35.28
										GW16_PFC1_DL2_sc1	GABAergic neurons	GW16_PFC1_DL2_sc1	38.78
										GW16_PFC1_DL2_sc2	GABAergic neurons	GW16_PFC1_DL2_sc2	186.61
										GW16_PFC1_DL2_sc3	Neurons	GW16_PFC1_DL2_sc3	9.16
										GW16_PFC1_DL2_sc5	Neurons	GW16_PFC1_DL2_sc5	0
										GW16_PFC1_DL2_sc6	GABAergic neurons	GW16_PFC1_DL2_sc6	379.44
										GW16_PFC1_DL2_sc7	Stem cells	GW16_PFC1_DL2_sc7	24.1
										GW16_PFC1_DL2_sc8	Neurons	GW16_PFC1_DL2_sc8	0
										GW16_PFC1_DL2_sc9	Neurons	GW16_PFC1_DL2_sc9	0
										GW16_PFC1_DL2_sc10	Stem cells	GW16_PFC1_DL2_sc10	20.27
										GW16_PFC1_DL2_sc11	Neurons	GW16_PFC1_DL2_sc11	0
										GW16_PFC1_DL2_sc12	Neurons	GW16_PFC1_DL2_sc12	14.82
										GW16_PFC1_DL2_sc13	Neurons	GW16_PFC1_DL2_sc13	236.3
										GW16_PFC1_DL2_sc15	Neurons	GW16_PFC1_DL2_sc15	75.72
										GW16_PFC1_DL2_sc16	Neurons	GW16_PFC1_DL2_sc16	139.57
										GW16_PFC1_DL2_sc17	Stem cells	GW16_PFC1_DL2_sc17	0
										GW16_PFC1_DL2_sc18	Neurons	GW16_PFC1_DL2_sc18	0
										GW16_PFC1_DL2_sc19	Neurons	GW16_PFC1_DL2_sc19	11.57
										GW16_PFC1_DL2_sc20	Neurons	GW16_PFC1_DL2_sc20	0
										GW16_PFC1_DL2_sc21	Stem cells	GW16_PFC1_DL2_sc21	0
										GW16_PFC1_DL2_sc22	Neurons	GW16_PFC1_DL2_sc22	18.76
										GW16_PFC1_DL2_sc23	GABAergic neurons	GW16_PFC1_DL2_sc23	11.24
										GW16_PFC1_DL2_sc24	GABAergic neurons	GW16_PFC1_DL2_sc24	237.94
										GW16_PFC1_L3_sc1	Neurons	GW16_PFC1_L3_sc1	63.77
										GW16_PFC1_L3_sc2	Neurons	GW16_PFC1_L3_sc2	121.33
										GW16_PFC1_L3_sc3	Stem cells	GW16_PFC1_L3_sc3	86.07
										GW16_PFC1_L3_sc4	Neurons	GW16_PFC1_L3_sc4	6.16
										GW16_PFC1_L3_sc5	Stem cells	GW16_PFC1_L3_sc5	15.58
										GW16_PFC1_L3_sc6	Stem cells	GW16_PFC1_L3_sc6	126.36
										GW16_PFC1_L3_sc7	Stem cells	GW16_PFC1_L3_sc7	32.13
										GW16_PFC1_L3_sc8	Neurons	GW16_PFC1_L3_sc8	5.56
										GW16_PFC1_L3_sc9	Stem cells	GW16_PFC1_L3_sc9	21.09
										GW16_PFC1_L3_sc10	Stem cells	GW16_PFC1_L3_sc10	688.18
										GW16_PFC1_L3_sc11	Neurons	GW16_PFC1_L3_sc11	0
										GW16_PFC1_L3_sc12	Stem cells	GW16_PFC1_L3_sc12	4.33
										GW16_PFC1_L3_sc13	Neurons	GW16_PFC1_L3_sc13	0
										GW16_PFC1_L3_sc14	Neurons	GW16_PFC1_L3_sc14	260.56
										GW16_PFC1_L3_sc15	Stem cells	GW16_PFC1_L3_sc15	5.04
										GW16_PFC1_L3_sc16	Neurons	GW16_PFC1_L3_sc16	5.25
										GW16_PFC1_L3_sc17	Neurons	GW16_PFC1_L3_sc17	15.26
										GW16_PFC1_L3_sc18	Neurons	GW16_PFC1_L3_sc18	73.78
										GW16_PFC1_L3_sc19	Stem cells	GW16_PFC1_L3_sc19	7.79
										GW16_PFC1_L3_sc20	Neurons	GW16_PFC1_L3_sc20	286.9
										GW16_PFC1_L3_sc21	Neurons	GW16_PFC1_L3_sc21	27.13
										GW16_PFC1_L3_sc22	Neurons	GW16_PFC1_L3_sc22	0
										GW16_PFC1_L3_sc23	Stem cells	GW16_PFC1_L3_sc23	69.2
										GW16_PFC1_L3_sc24	Neurons	GW16_PFC1_L3_sc24	2.28
										GW16_PFC1_L2_sc1	Neurons	GW16_PFC1_L2_sc1	10.14
										GW16_PFC1_L2_sc3	Neurons	GW16_PFC1_L2_sc3	0
										GW16_PFC1_L2_sc4	Stem cells	GW16_PFC1_L2_sc4	145.4
										GW16_PFC1_L2_sc5	Neurons	GW16_PFC1_L2_sc5	5.3
										GW16_PFC1_L2_sc6	Neurons	GW16_PFC1_L2_sc6	3.89
										GW16_PFC1_L2_sc7	Neurons	GW16_PFC1_L2_sc7	0
										GW16_PFC1_L2_sc8	Neurons	GW16_PFC1_L2_sc8	0
										GW16_PFC1_L2_sc9	GABAergic neurons	GW16_PFC1_L2_sc9	109.28
										GW16_PFC1_L2_sc10	Neurons	GW16_PFC1_L2_sc10	145.47
										GW16_PFC1_L2_sc11	Neurons	GW16_PFC1_L2_sc11	0
										GW16_PFC1_L2_sc12	Neurons	GW16_PFC1_L2_sc12	7.53
										GW16_PFC1_L2_sc13	Neurons	GW16_PFC1_L2_sc13	86.85
										GW16_PFC1_L2_sc14	GABAergic neurons	GW16_PFC1_L2_sc14	0
										GW16_PFC1_L2_sc15	Neurons	GW16_PFC1_L2_sc15	0
										GW16_PFC1_L2_sc16	GABAergic neurons	GW16_PFC1_L2_sc16	12.21
										GW16_PFC1_D1_sc1	GABAergic neurons	GW16_PFC1_D1_sc1	10.2
										GW16_PFC1_D1_sc2	Neurons	GW16_PFC1_D1_sc2	136.74
										GW16_PFC1_D1_sc4	GABAergic neurons	GW16_PFC1_D1_sc4	877
										GW16_PFC1_D1_sc6	Neurons	GW16_PFC1_D1_sc6	229.52
										GW16_PFC1_D1_sc7	GABAergic neurons	GW16_PFC1_D1_sc7	0
										GW16_PFC1_D1_sc8	Neurons	GW16_PFC1_D1_sc8	266.4
										GW16_PFC1_D1_sc9	Neurons	GW16_PFC1_D1_sc9	586.72
										GW16_PFC1_D1_sc10	GABAergic neurons	GW16_PFC1_D1_sc10	11.43
										GW16_PFC1_D1_sc11	Neurons	GW16_PFC1_D1_sc11	0
										GW16_PFC1_D1_sc12	Neurons	GW16_PFC1_D1_sc12	93.42
										GW16_PFC1_D1_sc13	Neurons	GW16_PFC1_D1_sc13	0
										GW16_PFC1_D1_sc14	Neurons	GW16_PFC1_D1_sc14	0
										GW16_PFC1_D1_sc15	GABAergic neurons	GW16_PFC1_D1_sc15	0
										GW16_PFC1_D1_sc16	Neurons	GW16_PFC1_D1_sc16	181.54
										GW16_PFC1_D1_sc17	Neurons	GW16_PFC1_D1_sc17	0
										GW16_PFC1_D1_sc18	Neurons	GW16_PFC1_D1_sc18	35.61
										GW16_PFC1_D1_sc19	Neurons	GW16_PFC1_D1_sc19	8.1
										GW16_PFC1_D1_sc20	Neurons	GW16_PFC1_D1_sc20	0
										GW16_PFC1_D1_sc21	GABAergic neurons	GW16_PFC1_D1_sc21	711.67
										GW16_PFC1_D1_sc22	Neurons	GW16_PFC1_D1_sc22	0
										GW16_PFC1_D1_sc23	Neurons	GW16_PFC1_D1_sc23	418.94
										GW16_PFC1_D1_sc24	Neurons	GW16_PFC1_D1_sc24	0
										GW16_PFC1_DL3_sc1	Neurons	GW16_PFC1_DL3_sc1	9.38
										GW16_PFC1_DL3_sc2	Neurons	GW16_PFC1_DL3_sc2	9.85
										GW16_PFC1_DL3_sc3	Neurons	GW16_PFC1_DL3_sc3	0
										GW16_PFC1_DL3_sc4	Neurons	GW16_PFC1_DL3_sc4	5.98
										GW16_PFC1_DL3_sc5	Neurons	GW16_PFC1_DL3_sc5	306.22
										GW16_PFC1_DL3_sc6	Neurons	GW16_PFC1_DL3_sc6	124.04
										GW16_PFC1_DL3_sc7	Stem cells	GW16_PFC1_DL3_sc7	0
										GW16_PFC1_DL3_sc8	Neurons	GW16_PFC1_DL3_sc8	88.06
										GW16_PFC1_DL3_sc9	Neurons	GW16_PFC1_DL3_sc9	81.43
										GW16_PFC1_DL3_sc10	Stem cells	GW16_PFC1_DL3_sc10	98.99
										GW16_PFC1_DL3_sc11	Neurons	GW16_PFC1_DL3_sc11	0
										GW16_PFC1_DL3_sc12	Stem cells	GW16_PFC1_DL3_sc12	2.4
										GW16_PFC1_DL3_sc13	Neurons	GW16_PFC1_DL3_sc13	0
										GW16_PFC1_DL3_sc14	Neurons	GW16_PFC1_DL3_sc14	40.55
										GW16_PFC1_DL3_sc15	Neurons	GW16_PFC1_DL3_sc15	0
										GW16_PFC1_DL3_sc16	Neurons	GW16_PFC1_DL3_sc16	75.84
										GW16_PFC1_DL3_sc17	Neurons	GW16_PFC1_DL3_sc17	386.7
										GW16_PFC1_DL3_sc18	Neurons	GW16_PFC1_DL3_sc18	25.57
										GW16_PFC1_DL3_sc19	Neurons	GW16_PFC1_DL3_sc19	102.13
										GW16_PFC1_DL3_sc20	Neurons	GW16_PFC1_DL3_sc20	78.09
										GW16_PFC1_DL3_sc21	Neurons	GW16_PFC1_DL3_sc21	191.34
										GW16_PFC1_DL3_sc22	Neurons	GW16_PFC1_DL3_sc22	46.42
										GW16_PFC1_DL3_sc23	Neurons	GW16_PFC1_DL3_sc23	5.57
										GW16_PFC1_DL3_sc24	Neurons	GW16_PFC1_DL3_sc24	0
										GW16_PFC1_DL4_sc1	Neurons	GW16_PFC1_DL4_sc1	0
										GW16_PFC1_DL4_sc2	GABAergic neurons	GW16_PFC1_DL4_sc2	0
										GW16_PFC1_DL4_sc3	Neurons	GW16_PFC1_DL4_sc3	173.65
										GW16_PFC1_DL4_sc4	Stem cells	GW16_PFC1_DL4_sc4	0
										GW16_PFC1_DL4_sc5	Neurons	GW16_PFC1_DL4_sc5	8.65
										GW16_PFC1_DL4_sc6	Neurons	GW16_PFC1_DL4_sc6	190.66
										GW16_PFC1_DL4_sc7	Neurons	GW16_PFC1_DL4_sc7	0
										GW16_PFC1_DL4_sc8	Neurons	GW16_PFC1_DL4_sc8	0
										GW16_PFC1_DL4_sc9	Neurons	GW16_PFC1_DL4_sc9	0
										GW16_PFC1_DL4_sc10	Neurons	GW16_PFC1_DL4_sc10	790.95
										GW16_PFC1_DL4_sc11	Neurons	GW16_PFC1_DL4_sc11	0
										GW16_PFC1_DL4_sc12	Neurons	GW16_PFC1_DL4_sc12	9.32
										GW16_PFC1_DL4_sc13	Neurons	GW16_PFC1_DL4_sc13	70.41
										GW16_PFC1_DL4_sc14	Neurons	GW16_PFC1_DL4_sc14	0
										GW16_PFC1_DL4_sc15	Neurons	GW16_PFC1_DL4_sc15	0
										GW16_PFC1_DL4_sc16	Stem cells	GW16_PFC1_DL4_sc16	0
										GW16_PFC1_DL4_sc17	Neurons	GW16_PFC1_DL4_sc17	0
										GW16_PFC1_DL4_sc18	OPC	GW16_PFC1_DL4_sc18	0
										GW16_PFC1_DL4_sc19	Neurons	GW16_PFC1_DL4_sc19	0
										GW16_PFC1_DL4_sc20	Neurons	GW16_PFC1_DL4_sc20	0
										GW16_PFC1_DL4_sc21	Neurons	GW16_PFC1_DL4_sc21	13.27
										GW16_PFC1_DL4_sc22	Neurons	GW16_PFC1_DL4_sc22	0
										GW16_PFC1_DL4_sc23	Neurons	GW16_PFC1_DL4_sc23	0
										GW16_PFC1_DL4_sc24	Neurons	GW16_PFC1_DL4_sc24	0
										GW16_PFC1_VL4_sc1	Neurons	GW16_PFC1_VL4_sc1	6.76
										GW16_PFC1_VL4_sc4	Neurons	GW16_PFC1_VL4_sc4	129.75
										GW16_PFC1_VL4_sc5	Neurons	GW16_PFC1_VL4_sc5	6.2
										GW16_PFC1_VL4_sc6	Neurons	GW16_PFC1_VL4_sc6	15.82
										GW16_PFC1_VL4_sc7	Neurons	GW16_PFC1_VL4_sc7	11.97
										GW16_PFC1_VL4_sc8	Neurons	GW16_PFC1_VL4_sc8	0
										GW16_PFC1_VL4_sc9	Neurons	GW16_PFC1_VL4_sc9	1238.6
										GW16_PFC1_VL4_sc10	GABAergic neurons	GW16_PFC1_VL4_sc10	4188.5
										GW16_PFC1_VL4_sc11	Neurons	GW16_PFC1_VL4_sc11	0
										GW16_PFC1_VL4_sc12	Stem cells	GW16_PFC1_VL4_sc12	238.62
										GW16_PFC1_VL4_sc13	Neurons	GW16_PFC1_VL4_sc13	0
										GW16_PFC1_VL4_sc14	Neurons	GW16_PFC1_VL4_sc14	0
										GW16_PFC1_VL4_sc15	Stem cells	GW16_PFC1_VL4_sc15	0
										GW16_PFC1_VL4_sc16	Stem cells	GW16_PFC1_VL4_sc16	197.86
										GW16_PFC1_F2_sc1	Neurons	GW16_PFC1_F2_sc1	0
										GW16_PFC1_F2_sc2	GABAergic neurons	GW16_PFC1_F2_sc2	0
										GW16_PFC1_F2_sc3	GABAergic neurons	GW16_PFC1_F2_sc3	250.61
										GW16_PFC1_F2_sc4	Stem cells	GW16_PFC1_F2_sc4	0
										GW16_PFC1_F2_sc5	Neurons	GW16_PFC1_F2_sc5	9.74
										GW16_PFC1_F2_sc6	GABAergic neurons	GW16_PFC1_F2_sc6	0
										GW16_PFC1_F2_sc7	Neurons	GW16_PFC1_F2_sc7	5.37
										GW16_PFC1_F2_sc8	Neurons	GW16_PFC1_F2_sc8	0
										GW16_PFC1_F2_sc9	GABAergic neurons	GW16_PFC1_F2_sc9	69.24
										GW16_PFC1_F2_sc10	Stem cells	GW16_PFC1_F2_sc10	63.47
										GW16_PFC1_F2_sc11	Neurons	GW16_PFC1_F2_sc11	0
										GW16_PFC1_F2_sc12	Neurons	GW16_PFC1_F2_sc12	9.54
										GW16_PFC1_F2_sc13	Neurons	GW16_PFC1_F2_sc13	0
										GW16_PFC1_F2_sc15	Neurons	GW16_PFC1_F2_sc15	96.43
										GW16_PFC1_F2_sc16	Stem cells	GW16_PFC1_F2_sc16	313.55
										GW16_PFC1_F2_sc17	Stem cells	GW16_PFC1_F2_sc17	3.33
										GW16_PFC1_F2_sc18	Neurons	GW16_PFC1_F2_sc18	0
										GW16_PFC1_F2_sc19	Neurons	GW16_PFC1_F2_sc19	155.07
										GW16_PFC1_F2_sc22	Neurons	GW16_PFC1_F2_sc22	13.64
										GW16_PFC1_F2_sc23	Neurons	GW16_PFC1_F2_sc23	124.75
										GW16_PFC1_D2_sc1	Neurons	GW16_PFC1_D2_sc1	0
										GW16_PFC1_D2_sc2	Neurons	GW16_PFC1_D2_sc2	9.21
										GW16_PFC1_D2_sc3	OPC	GW16_PFC1_D2_sc3	0
										GW16_PFC1_D2_sc4	Stem cells	GW16_PFC1_D2_sc4	386.07
										GW16_PFC1_D2_sc5	Neurons	GW16_PFC1_D2_sc5	86.03
										GW16_PFC1_D2_sc6	Neurons	GW16_PFC1_D2_sc6	0
										GW16_PFC1_D2_sc7	Neurons	GW16_PFC1_D2_sc7	86.35
										GW16_PFC1_D2_sc8	GABAergic neurons	GW16_PFC1_D2_sc8	602.81
										GW16_PFC1_D2_sc9	GABAergic neurons	GW16_PFC1_D2_sc9	0
										GW16_PFC1_D2_sc10	Neurons	GW16_PFC1_D2_sc10	7.46
										GW16_PFC1_D2_sc11	Neurons	GW16_PFC1_D2_sc11	5.27
										GW16_PFC1_D2_sc12	Neurons	GW16_PFC1_D2_sc12	690.5
										GW16_PFC1_D2_sc13	Neurons	GW16_PFC1_D2_sc13	51.12
										GW16_PFC1_D2_sc14	Neurons	GW16_PFC1_D2_sc14	0
										GW16_PFC1_D2_sc15	Neurons	GW16_PFC1_D2_sc15	0
										GW16_PFC1_D2_sc16	GABAergic neurons	GW16_PFC1_D2_sc16	20.92
										GW16_PFC1_D2_sc17	Neurons	GW16_PFC1_D2_sc17	0
										GW16_PFC1_D2_sc18	OPC	GW16_PFC1_D2_sc18	5.8
										GW16_PFC1_D2_sc19	Stem cells	GW16_PFC1_D2_sc19	0
										GW16_PFC1_D2_sc20	Stem cells	GW16_PFC1_D2_sc20	28.72
										GW16_PFC1_D2_sc21	Neurons	GW16_PFC1_D2_sc21	328.19
										GW16_PFC1_D2_sc23	Neurons	GW16_PFC1_D2_sc23	0
										GW16_PFC1_D2_sc24	GABAergic neurons	GW16_PFC1_D2_sc24	626.26
										GW16_PFC1_VL1_sc1	Neurons	GW16_PFC1_VL1_sc1	4.08
										GW16_PFC1_VL1_sc2	GABAergic neurons	GW16_PFC1_VL1_sc2	17.97
										GW16_PFC1_VL1_sc4	Stem cells	GW16_PFC1_VL1_sc4	0
										GW16_PFC1_VL1_sc5	GABAergic neurons	GW16_PFC1_VL1_sc5	0
										GW16_PFC1_VL1_sc6	Neurons	GW16_PFC1_VL1_sc6	15.89
										GW16_PFC1_VL1_sc7	Neurons	GW16_PFC1_VL1_sc7	232.1
										GW16_PFC1_VL1_sc8	Neurons	GW16_PFC1_VL1_sc8	235.45
										GW16_PFC1_VL1_sc9	Neurons	GW16_PFC1_VL1_sc9	7.85
										GW16_PFC1_VL1_sc10	Neurons	GW16_PFC1_VL1_sc10	196.03
										GW16_PFC1_VL1_sc11	OPC	GW16_PFC1_VL1_sc11	0
										GW16_PFC1_VL1_sc12	Neurons	GW16_PFC1_VL1_sc12	8.01
										GW16_PFC1_VL1_sc13	GABAergic neurons	GW16_PFC1_VL1_sc13	0
										GW16_PFC1_VL1_sc14	Neurons	GW16_PFC1_VL1_sc14	7.89
										GW16_PFC1_VL1_sc15	Stem cells	GW16_PFC1_VL1_sc15	23.4
										GW16_PFC1_VL1_sc16	Neurons	GW16_PFC1_VL1_sc16	0
										GW16_PFC1_VL1_sc17	Neurons	GW16_PFC1_VL1_sc17	210.31
										GW16_PFC1_VL1_sc18	Neurons	GW16_PFC1_VL1_sc18	124.85
										GW16_PFC1_VL1_sc19	Neurons	GW16_PFC1_VL1_sc19	113.47
										GW16_PFC1_VL1_sc20	Neurons	GW16_PFC1_VL1_sc20	0
										GW16_PFC1_VL1_sc21	Neurons	GW16_PFC1_VL1_sc21	223.69
										GW16_PFC1_VL1_sc22	Stem cells	GW16_PFC1_VL1_sc22	0
										GW16_PFC1_VL1_sc23	Neurons	GW16_PFC1_VL1_sc23	0
										GW16_PFC1_VL1_sc24	Neurons	GW16_PFC1_VL1_sc24	0
										GW16_PFC1_C2_sc1	Neurons	GW16_PFC1_C2_sc1	251.87
										GW16_PFC1_C2_sc2	Neurons	GW16_PFC1_C2_sc2	0
										GW16_PFC1_C2_sc3	Neurons	GW16_PFC1_C2_sc3	0
										GW16_PFC1_C2_sc4	GABAergic neurons	GW16_PFC1_C2_sc4	0
										GW16_PFC1_C2_sc5	Neurons	GW16_PFC1_C2_sc5	1.7
										GW16_PFC1_C2_sc6	Neurons	GW16_PFC1_C2_sc6	0
										GW16_PFC1_C2_sc7	Stem cells	GW16_PFC1_C2_sc7	81.09
										GW16_PFC1_C2_sc8	Neurons	GW16_PFC1_C2_sc8	285.06
										GW16_PFC1_C2_sc9	Neurons	GW16_PFC1_C2_sc9	255.44
										GW16_PFC1_C2_sc10	Neurons	GW16_PFC1_C2_sc10	4.49
										GW16_PFC1_C2_sc11	Neurons	GW16_PFC1_C2_sc11	129.49
										GW16_PFC1_C2_sc12	Stem cells	GW16_PFC1_C2_sc12	196.11
										GW16_PFC1_C2_sc13	GABAergic neurons	GW16_PFC1_C2_sc13	240.77
										GW16_PFC1_C2_sc14	Neurons	GW16_PFC1_C2_sc14	257.58
										GW16_PFC1_C2_sc15	Neurons	GW16_PFC1_C2_sc15	5.25
										GW16_PFC1_C2_sc16	Neurons	GW16_PFC1_C2_sc16	11.02
										GW16_PFC1_B1_sc19	Microglia	GW16_PFC1_B1_sc19	0
										GW16_PFC1_D4_sc1	Microglia	GW16_PFC1_D4_sc1	8.41
										GW16_PFC1_D4_sc17	Microglia	GW16_PFC1_D4_sc17	9.19
										GW16_PFC1_F3_sc4	Microglia	GW16_PFC1_F3_sc4	43.73
										GW16_PFC1_C1_sc12	Microglia	GW16_PFC1_C1_sc12	0
										GW16_PFC1_DL2_sc14	Microglia	GW16_PFC1_DL2_sc14	166.74
										GW16_PFC1_L2_sc2	Microglia	GW16_PFC1_L2_sc2	0
										GW16_PFC1_VL4_sc2	Microglia	GW16_PFC1_VL4_sc2	160.78
										GW16_PFC1_F2_sc20	Microglia	GW16_PFC1_F2_sc20	5.78
										GW16_PFC1_F2_sc24	Microglia	GW16_PFC1_F2_sc24	12.31
										GW16_PFC1_VL1_sc3	Microglia	GW16_PFC1_VL1_sc3	0
										GW19_PFC1_sc1	Neurons	GW19_PFC1_sc1	0
										GW19_PFC1_sc2	GABAergic neurons	GW19_PFC1_sc2	0
										GW19_PFC1_sc3	Stem cells	GW19_PFC1_sc3	0
										GW19_PFC1_sc4	OPC	GW19_PFC1_sc4	34.66
										GW19_PFC1_sc5	GABAergic neurons	GW19_PFC1_sc5	26.64
										GW19_PFC1_sc6	Neurons	GW19_PFC1_sc6	0
										GW19_PFC1_sc7	Neurons	GW19_PFC1_sc7	0
										GW19_PFC1_sc8	GABAergic neurons	GW19_PFC1_sc8	0
										GW19_PFC1_sc9	Neurons	GW19_PFC1_sc9	7.04
										GW19_PFC1_sc10	GABAergic neurons	GW19_PFC1_sc10	26.09
										GW19_PFC1_sc11	GABAergic neurons	GW19_PFC1_sc11	0
										GW19_PFC1_sc12	Neurons	GW19_PFC1_sc12	0
										GW19_PFC1_sc13	Neurons	GW19_PFC1_sc13	205.04
										GW19_PFC1_sc14	Neurons	GW19_PFC1_sc14	0
										GW19_PFC1_sc15	Astrocytes	GW19_PFC1_sc15	110.29
										GW19_PFC1_sc16	GABAergic neurons	GW19_PFC1_sc16	0
										GW19_PFC1_sc17	GABAergic neurons	GW19_PFC1_sc17	0
										GW19_PFC1_sc18	Neurons	GW19_PFC1_sc18	9.42
										GW19_PFC1_sc19	Neurons	GW19_PFC1_sc19	0
										GW19_PFC1_sc20	Neurons	GW19_PFC1_sc20	380.54
										GW19_PFC1_sc21	Neurons	GW19_PFC1_sc21	318.71
										GW19_PFC1_sc22	OPC	GW19_PFC1_sc22	11.99
										GW19_PFC1_sc23	OPC	GW19_PFC1_sc23	6.13
										GW19_PFC1_sc24	Neurons	GW19_PFC1_sc24	454.3
										GW19_PFC1_sc25	Neurons	GW19_PFC1_sc25	209.44
										GW19_PFC1_sc26	Astrocytes	GW19_PFC1_sc26	630.57
										GW19_PFC1_sc27	Neurons	GW19_PFC1_sc27	37.34
										GW19_PFC1_sc28	Neurons	GW19_PFC1_sc28	0
										GW19_PFC1_sc29	Neurons	GW19_PFC1_sc29	0
										GW19_PFC1_sc30	GABAergic neurons	GW19_PFC1_sc30	0
										GW19_PFC1_sc31	Neurons	GW19_PFC1_sc31	0
										GW19_PFC1_sc32	GABAergic neurons	GW19_PFC1_sc32	0
										GW19_PFC1_sc33	Neurons	GW19_PFC1_sc33	0
										GW19_PFC1_sc34	Neurons	GW19_PFC1_sc34	0
										GW19_PFC1_sc35	Neurons	GW19_PFC1_sc35	32.95
										GW19_PFC1_sc36	Neurons	GW19_PFC1_sc36	4.33
										GW19_PFC1_sc37	GABAergic neurons	GW19_PFC1_sc37	0
										GW19_PFC1_sc38	Neurons	GW19_PFC1_sc38	106.33
										GW19_PFC1_sc39	Astrocytes	GW19_PFC1_sc39	162.72
										GW19_PFC1_sc40	GABAergic neurons	GW19_PFC1_sc40	147.43
										GW19_PFC1_sc41	Neurons	GW19_PFC1_sc41	0
										GW19_PFC1_sc42	Neurons	GW19_PFC1_sc42	1.98
										GW19_PFC1_sc43	Neurons	GW19_PFC1_sc43	3.85
										GW19_PFC1_sc44	Neurons	GW19_PFC1_sc44	5.69
										GW19_PFC1_sc45	Neurons	GW19_PFC1_sc45	0
										GW19_PFC1_sc46	Neurons	GW19_PFC1_sc46	0
										GW19_PFC1_sc47	Stem cells	GW19_PFC1_sc47	0
										GW19_PFC1_sc49	Stem cells	GW19_PFC1_sc49	1.1
										GW19_PFC1_sc50	Neurons	GW19_PFC1_sc50	4.75
										GW19_PFC1_sc51	GABAergic neurons	GW19_PFC1_sc51	5.1
										GW19_PFC1_sc52	Neurons	GW19_PFC1_sc52	312.23
										GW19_PFC1_sc53	Neurons	GW19_PFC1_sc53	782.11
										GW19_PFC1_sc54	GABAergic neurons	GW19_PFC1_sc54	4.99
										GW19_PFC1_sc55	GABAergic neurons	GW19_PFC1_sc55	8.37
										GW19_PFC1_sc56	Stem cells	GW19_PFC1_sc56	336.11
										GW19_PFC1_sc57	Neurons	GW19_PFC1_sc57	0
										GW19_PFC1_sc58	Neurons	GW19_PFC1_sc58	0
										GW19_PFC1_sc59	Neurons	GW19_PFC1_sc59	4.66
										GW19_PFC1_sc60	GABAergic neurons	GW19_PFC1_sc60	21.66
										GW19_PFC1_sc61	Neurons	GW19_PFC1_sc61	0
										GW19_PFC1_sc62	Neurons	GW19_PFC1_sc62	0
										GW19_PFC1_sc63	Neurons	GW19_PFC1_sc63	0
										GW19_PFC1_sc64	Neurons	GW19_PFC1_sc64	0
										GW19_PFC1_sc65	GABAergic neurons	GW19_PFC1_sc65	0
										GW19_PFC1_sc66	Astrocytes	GW19_PFC1_sc66	0
										GW19_PFC1_sc67	Stem cells	GW19_PFC1_sc67	2.38
										GW19_PFC1_sc68	Neurons	GW19_PFC1_sc68	0
										GW19_PFC1_sc69	Neurons	GW19_PFC1_sc69	0
										GW19_PFC1_sc70	Neurons	GW19_PFC1_sc70	16.07
										GW19_PFC1_sc71	Neurons	GW19_PFC1_sc71	0
										GW19_PFC1_sc72	GABAergic neurons	GW19_PFC1_sc72	0
										GW19_PFC1_sc73	Neurons	GW19_PFC1_sc73	0
										GW19_PFC1_sc74	Neurons	GW19_PFC1_sc74	0
										GW19_PFC1_sc75	Neurons	GW19_PFC1_sc75	0
										GW19_PFC1_sc76	Neurons	GW19_PFC1_sc76	5.09
										GW19_PFC1_sc77	Neurons	GW19_PFC1_sc77	0
										GW19_PFC1_sc78	Neurons	GW19_PFC1_sc78	0
										GW19_PFC1_sc79	Neurons	GW19_PFC1_sc79	8.8
										GW19_PFC1_sc80	GABAergic neurons	GW19_PFC1_sc80	0
										GW19_PFC1_sc81	Neurons	GW19_PFC1_sc81	0
										GW19_PFC1_sc82	Neurons	GW19_PFC1_sc82	331.13
										GW19_PFC1_sc83	Neurons	GW19_PFC1_sc83	221.65
										GW19_PFC1_sc84	Neurons	GW19_PFC1_sc84	280.53
										GW19_PFC1_sc85	Neurons	GW19_PFC1_sc85	125.93
										GW19_PFC1_sc86	GABAergic neurons	GW19_PFC1_sc86	770.76
										GW19_PFC1_sc87	Neurons	GW19_PFC1_sc87	0
										GW19_PFC1_sc88	Neurons	GW19_PFC1_sc88	0
										GW19_PFC1_sc89	Neurons	GW19_PFC1_sc89	0
										GW19_PFC1_sc90	Neurons	GW19_PFC1_sc90	4.47
										GW19_PFC1_sc91	GABAergic neurons	GW19_PFC1_sc91	0
										GW19_PFC1_sc92	Neurons	GW19_PFC1_sc92	15.25
										GW19_PFC1_sc93	Neurons	GW19_PFC1_sc93	345.14
										GW19_PFC1_sc94	Neurons	GW19_PFC1_sc94	310.19
										GW19_PFC1_sc95	Neurons	GW19_PFC1_sc95	0
										GW19_PFC1_sc96	Neurons	GW19_PFC1_sc96	5.15
										GW19_PFC1_sc97	Neurons	GW19_PFC1_sc97	0
										GW19_PFC1_sc98	Neurons	GW19_PFC1_sc98	0
										GW19_PFC1_sc99	Astrocytes	GW19_PFC1_sc99	225.39
										GW19_PFC1_sc100	Neurons	GW19_PFC1_sc100	0
										GW19_PFC1_sc101	Neurons	GW19_PFC1_sc101	23.03
										GW19_PFC1_sc102	Neurons	GW19_PFC1_sc102	0
										GW19_PFC1_sc103	Neurons	GW19_PFC1_sc103	4.21
										GW19_PFC1_sc104	Neurons	GW19_PFC1_sc104	0
										GW19_PFC1_sc105	Astrocytes	GW19_PFC1_sc105	0
										GW19_PFC1_sc106	Neurons	GW19_PFC1_sc106	0
										GW19_PFC1_sc107	Neurons	GW19_PFC1_sc107	178.33
										GW19_PFC1_sc108	GABAergic neurons	GW19_PFC1_sc108	8.02
										GW19_PFC1_sc109	Neurons	GW19_PFC1_sc109	5.09
										GW19_PFC1_sc110	Neurons	GW19_PFC1_sc110	581.9
										GW19_PFC1_sc111	Neurons	GW19_PFC1_sc111	0
										GW19_PFC1_sc112	GABAergic neurons	GW19_PFC1_sc112	42.21
										GW19_PFC1_sc113	Neurons	GW19_PFC1_sc113	6.49
										GW19_PFC1_sc114	Neurons	GW19_PFC1_sc114	0
										GW19_PFC1_sc115	Neurons	GW19_PFC1_sc115	5.61
										GW19_PFC1_sc116	Neurons	GW19_PFC1_sc116	45.07
										GW19_PFC1_sc117	Neurons	GW19_PFC1_sc117	0
										GW19_PFC1_sc118	Neurons	GW19_PFC1_sc118	0
										GW19_PFC1_sc119	Neurons	GW19_PFC1_sc119	466.99
										GW19_PFC1_sc120	OPC	GW19_PFC1_sc120	0
										GW19_PFC1_sc48	Microglia	GW19_PFC1_sc48	0
										GW23_PFC1_sc1	Neurons	GW23_PFC1_sc1	19.08
										GW23_PFC1_sc2	Astrocytes	GW23_PFC1_sc2	2.33
										GW23_PFC1_sc3	Neurons	GW23_PFC1_sc3	0
										GW23_PFC1_sc4	Neurons	GW23_PFC1_sc4	641.51
										GW23_PFC1_sc5	GABAergic neurons	GW23_PFC1_sc5	0
										GW23_PFC1_sc6	Neurons	GW23_PFC1_sc6	0
										GW23_PFC1_sc7	Neurons	GW23_PFC1_sc7	9.36
										GW23_PFC1_sc8	GABAergic neurons	GW23_PFC1_sc8	0
										GW23_PFC1_sc9	Neurons	GW23_PFC1_sc9	0
										GW23_PFC1_sc10	GABAergic neurons	GW23_PFC1_sc10	35.57
										GW23_PFC1_sc11	Neurons	GW23_PFC1_sc11	0
										GW23_PFC1_sc12	GABAergic neurons	GW23_PFC1_sc12	0
										GW23_PFC1_sc13	Neurons	GW23_PFC1_sc13	12.32
										GW23_PFC1_sc14	GABAergic neurons	GW23_PFC1_sc14	0
										GW23_PFC1_sc15	GABAergic neurons	GW23_PFC1_sc15	8.13
										GW23_PFC1_sc16	GABAergic neurons	GW23_PFC1_sc16	12.49
										GW23_PFC1_sc17	GABAergic neurons	GW23_PFC1_sc17	9.73
										GW23_PFC1_sc18	GABAergic neurons	GW23_PFC1_sc18	0
										GW23_PFC1_sc19	OPC	GW23_PFC1_sc19	0
										GW23_PFC1_sc20	OPC	GW23_PFC1_sc20	0
										GW23_PFC1_sc21	Neurons	GW23_PFC1_sc21	293.95
										GW23_PFC1_sc22	GABAergic neurons	GW23_PFC1_sc22	442.14
										GW23_PFC1_sc23	Neurons	GW23_PFC1_sc23	284.01
										GW23_PFC1_sc24	OPC	GW23_PFC1_sc24	5.87
										GW23_PFC1_sc25	GABAergic neurons	GW23_PFC1_sc25	11.28
										GW23_PFC1_sc26	GABAergic neurons	GW23_PFC1_sc26	0
										GW23_PFC1_sc27	Neurons	GW23_PFC1_sc27	383.74
										GW23_PFC1_sc28	Neurons	GW23_PFC1_sc28	0
										GW23_PFC1_sc29	OPC	GW23_PFC1_sc29	0
										GW23_PFC1_sc30	Neurons	GW23_PFC1_sc30	0
										GW23_PFC1_sc31	GABAergic neurons	GW23_PFC1_sc31	586.74
										GW23_PFC1_sc32	GABAergic neurons	GW23_PFC1_sc32	0
										GW23_PFC1_sc33	GABAergic neurons	GW23_PFC1_sc33	0
										GW23_PFC1_sc34	GABAergic neurons	GW23_PFC1_sc34	0
										GW23_PFC1_sc35	OPC	GW23_PFC1_sc35	183.52
										GW23_PFC1_sc36	GABAergic neurons	GW23_PFC1_sc36	0
										GW23_PFC1_sc37	OPC	GW23_PFC1_sc37	0
										GW23_PFC1_sc38	Neurons	GW23_PFC1_sc38	329.98
										GW23_PFC1_sc39	GABAergic neurons	GW23_PFC1_sc39	0
										GW23_PFC1_sc40	Neurons	GW23_PFC1_sc40	0
										GW23_PFC1_sc41	Neurons	GW23_PFC1_sc41	425.25
										GW23_PFC1_sc42	Neurons	GW23_PFC1_sc42	0
										GW23_PFC1_sc43	Astrocytes	GW23_PFC1_sc43	0
										GW23_PFC1_sc44	GABAergic neurons	GW23_PFC1_sc44	0
										GW23_PFC1_sc45	Neurons	GW23_PFC1_sc45	0
										GW23_PFC1_sc46	Neurons	GW23_PFC1_sc46	0
										GW23_PFC1_sc47	Neurons	GW23_PFC1_sc47	201.16
										GW23_PFC1_sc48	Neurons	GW23_PFC1_sc48	0
										GW23_PFC1_sc49	Neurons	GW23_PFC1_sc49	3.11
										GW23_PFC1_sc50	GABAergic neurons	GW23_PFC1_sc50	5.58
										GW23_PFC1_sc51	GABAergic neurons	GW23_PFC1_sc51	0
										GW23_PFC1_sc52	GABAergic neurons	GW23_PFC1_sc52	0
										GW23_PFC1_sc53	GABAergic neurons	GW23_PFC1_sc53	0
										GW23_PFC1_sc54	Neurons	GW23_PFC1_sc54	0
										GW23_PFC1_sc55	OPC	GW23_PFC1_sc55	0
										GW23_PFC1_sc56	Neurons	GW23_PFC1_sc56	4.44
										GW23_PFC1_sc57	GABAergic neurons	GW23_PFC1_sc57	627.24
										GW23_PFC1_sc58	Neurons	GW23_PFC1_sc58	0
										GW23_PFC1_sc59	Neurons	GW23_PFC1_sc59	2.83
										GW23_PFC1_sc60	Stem cells	GW23_PFC1_sc60	375.81
										GW23_PFC1_sc61	Neurons	GW23_PFC1_sc61	0
										GW23_PFC1_sc62	Neurons	GW23_PFC1_sc62	31.36
										GW23_PFC1_sc63	Neurons	GW23_PFC1_sc63	0
										GW23_PFC1_sc64	GABAergic neurons	GW23_PFC1_sc64	0
										GW23_PFC1_sc65	Astrocytes	GW23_PFC1_sc65	151.26
										GW23_PFC1_sc66	OPC	GW23_PFC1_sc66	0
										GW23_PFC1_sc67	GABAergic neurons	GW23_PFC1_sc67	1041
										GW23_PFC1_sc68	Neurons	GW23_PFC1_sc68	347.93
										GW23_PFC1_sc69	GABAergic neurons	GW23_PFC1_sc69	0
										GW23_PFC1_sc70	GABAergic neurons	GW23_PFC1_sc70	676.3
										GW23_PFC1_sc72	Neurons	GW23_PFC1_sc72	0
										GW23_PFC1_sc73	Neurons	GW23_PFC1_sc73	0
										GW23_PFC1_sc74	Neurons	GW23_PFC1_sc74	6.73
										GW23_PFC1_sc75	Neurons	GW23_PFC1_sc75	0
										GW23_PFC1_sc77	GABAergic neurons	GW23_PFC1_sc77	0
										GW23_PFC1_sc78	GABAergic neurons	GW23_PFC1_sc78	0
										GW23_PFC1_sc79	GABAergic neurons	GW23_PFC1_sc79	0
										GW23_PFC1_sc80	Neurons	GW23_PFC1_sc80	0
										GW23_PFC1_sc81	GABAergic neurons	GW23_PFC1_sc81	0
										GW23_PFC1_sc82	OPC	GW23_PFC1_sc82	0
										GW23_PFC1_sc83	GABAergic neurons	GW23_PFC1_sc83	0
										GW23_PFC1_sc84	Neurons	GW23_PFC1_sc84	0
										GW23_PFC1_sc85	Neurons	GW23_PFC1_sc85	0
										GW23_PFC1_sc86	GABAergic neurons	GW23_PFC1_sc86	0
										GW23_PFC1_sc87	Neurons	GW23_PFC1_sc87	0
										GW23_PFC1_sc88	GABAergic neurons	GW23_PFC1_sc88	0
										GW23_PFC1_sc89	GABAergic neurons	GW23_PFC1_sc89	0
										GW23_PFC1_sc90	Neurons	GW23_PFC1_sc90	271.61
										GW23_PFC1_sc91	Neurons	GW23_PFC1_sc91	0
										GW23_PFC1_sc92	Neurons	GW23_PFC1_sc92	0
										GW23_PFC1_sc94	GABAergic neurons	GW23_PFC1_sc94	0
										GW23_PFC1_sc95	GABAergic neurons	GW23_PFC1_sc95	0
										GW23_PFC1_sc96	Neurons	GW23_PFC1_sc96	0
										GW23_PFC1_sc105	Neurons	GW23_PFC1_sc105	0
										GW23_PFC1_sc106	GABAergic neurons	GW23_PFC1_sc106	0
										GW23_PFC1_sc107	Neurons	GW23_PFC1_sc107	2.91
										GW23_PFC1_sc108	Neurons	GW23_PFC1_sc108	3.89
										GW23_PFC1_sc109	GABAergic neurons	GW23_PFC1_sc109	12.2
										GW23_PFC1_sc110	GABAergic neurons	GW23_PFC1_sc110	8.85
										GW23_PFC1_sc111	GABAergic neurons	GW23_PFC1_sc111	0
										GW23_PFC1_sc112	Neurons	GW23_PFC1_sc112	7.38
										GW23_PFC1_sc113	GABAergic neurons	GW23_PFC1_sc113	11.14
										GW23_PFC1_sc114	GABAergic neurons	GW23_PFC1_sc114	11.83
										GW23_PFC1_sc115	GABAergic neurons	GW23_PFC1_sc115	809.46
										GW23_PFC1_sc116	GABAergic neurons	GW23_PFC1_sc116	0
										GW23_PFC1_sc117	OPC	GW23_PFC1_sc117	0
										GW23_PFC1_sc119	Neurons	GW23_PFC1_sc119	11.25
										GW23_PFC1_sc120	Neurons	GW23_PFC1_sc120	12.02
										GW23_PFC1_sc121	GABAergic neurons	GW23_PFC1_sc121	0
										GW23_PFC1_sc122	Neurons	GW23_PFC1_sc122	47.62
										GW23_PFC1_sc123	OPC	GW23_PFC1_sc123	446.45
										GW23_PFC1_sc124	Neurons	GW23_PFC1_sc124	317.47
										GW23_PFC1_sc125	GABAergic neurons	GW23_PFC1_sc125	697.75
										GW23_PFC1_sc126	GABAergic neurons	GW23_PFC1_sc126	5.12
										GW23_PFC1_sc127	GABAergic neurons	GW23_PFC1_sc127	0
										GW23_PFC1_sc128	Neurons	GW23_PFC1_sc128	0
										GW23_PFC1_sc129	GABAergic neurons	GW23_PFC1_sc129	0
										GW23_PFC1_sc130	Neurons	GW23_PFC1_sc130	0
										GW23_PFC1_sc131	OPC	GW23_PFC1_sc131	0
										GW23_PFC1_sc132	GABAergic neurons	GW23_PFC1_sc132	151.82
										GW23_PFC1_sc133	GABAergic neurons	GW23_PFC1_sc133	546.34
										GW23_PFC1_sc134	Neurons	GW23_PFC1_sc134	64.97
										GW23_PFC1_sc135	Neurons	GW23_PFC1_sc135	0
										GW23_PFC1_sc136	GABAergic neurons	GW23_PFC1_sc136	6.44
										GW23_PFC1_sc137	Neurons	GW23_PFC1_sc137	635.07
										GW23_PFC1_sc138	Neurons	GW23_PFC1_sc138	3.07
										GW23_PFC1_sc139	OPC	GW23_PFC1_sc139	0
										GW23_PFC1_sc140	OPC	GW23_PFC1_sc140	10.27
										GW23_PFC1_sc141	Neurons	GW23_PFC1_sc141	0
										GW23_PFC1_sc142	Neurons	GW23_PFC1_sc142	612.92
										GW23_PFC1_sc143	Neurons	GW23_PFC1_sc143	0
										GW23_PFC1_sc144	Neurons
										GW23_PFC2_RMF3_F10_sc51	GABAergic neurons	GW23_PFC2_RMF3_F10_sc51	0
										GW23_PFC2_RMF3_F10_sc52	Neurons	GW23_PFC2_RMF3_F10_sc52	153.34
										GW23_PFC2_RMF3_F10_sc53	GABAergic neurons	GW23_PFC2_RMF3_F10_sc53	0
										GW23_PFC2_RMF3_F10_sc54	GABAergic neurons	GW23_PFC2_RMF3_F10_sc54	59.27
										GW23_PFC2_RMF3_F10_sc55	GABAergic neurons	GW23_PFC2_RMF3_F10_sc55	0
										GW23_PFC2_RMF3_F10_sc58	GABAergic neurons	GW23_PFC2_RMF3_F10_sc58	279.36
										GW23_PFC2_RMF3_F10_sc59	GABAergic neurons	GW23_PFC2_RMF3_F10_sc59	0
										GW23_PFC2_RMF3_F10_sc60	GABAergic neurons	GW23_PFC2_RMF3_F10_sc60	21.5
										GW23_PFC2_RMF3_F10_sc61	GABAergic neurons	GW23_PFC2_RMF3_F10_sc61	18.95
										GW23_PFC2_RMF3_F10_sc62	GABAergic neurons	GW23_PFC2_RMF3_F10_sc62	0
										GW23_PFC2_RMF3_F10_sc63	GABAergic neurons	GW23_PFC2_RMF3_F10_sc63	236.08
										GW23_PFC2_RMF3_F10_sc64	GABAergic neurons	GW23_PFC2_RMF3_F10_sc64	207.7
										GW23_PFC2_RMF3_F10_sc65	GABAergic neurons	GW23_PFC2_RMF3_F10_sc65	0
										GW23_PFC2_RMF3_F10_sc66	GABAergic neurons	GW23_PFC2_RMF3_F10_sc66	5.89
										GW23_PFC2_RMF3_F10_sc75	GABAergic neurons	GW23_PFC2_RMF3_F10_sc75	6.94
										GW23_PFC2_RMF3_F10_sc76	GABAergic neurons	GW23_PFC2_RMF3_F10_sc76	0
										GW23_PFC2_RMF3_F10_sc77	GABAergic neurons	GW23_PFC2_RMF3_F10_sc77	0
										GW23_PFC2_RMF3_F10_sc78	GABAergic neurons	GW23_PFC2_RMF3_F10_sc78	5.12
										GW23_PFC2_RMF3_F10_sc79	GABAergic neurons	GW23_PFC2_RMF3_F10_sc79	204.08
										GW23_PFC2_RMF3_F10_sc80	Neurons	GW23_PFC2_RMF3_F10_sc80	0
										GW23_PFC2_RMF3_F10_sc82	Stem cells	GW23_PFC2_RMF3_F10_sc82	0
										GW23_PFC2_PAO3_F15_sc27	GABAergic neurons	GW23_PFC2_PAO3_F15_sc27	29.8
										GW23_PFC2_PAO3_F15_sc28	GABAergic neurons	GW23_PFC2_PAO3_F15_sc28	56.2
										GW23_PFC2_PAO3_F15_sc29	OPC	GW23_PFC2_PAO3_F15_sc29	2.11
										GW23_PFC2_PAO3_F15_sc30	GABAergic neurons	GW23_PFC2_PAO3_F15_sc30	490.73
										GW23_PFC2_PAO3_F15_sc31	GABAergic neurons	GW23_PFC2_PAO3_F15_sc31	0
										GW23_PFC2_PAO3_F15_sc32	OPC	GW23_PFC2_PAO3_F15_sc32	5.95
										GW23_PFC2_PAO3_F15_sc33	Neurons	GW23_PFC2_PAO3_F15_sc33	473.35
										GW23_PFC2_PAO3_F15_sc36	GABAergic neurons	GW23_PFC2_PAO3_F15_sc36	13.53
										GW23_PFC2_PAO3_F15_sc37	GABAergic neurons	GW23_PFC2_PAO3_F15_sc37	0
										GW23_PFC2_PAO3_F15_sc38	GABAergic neurons	GW23_PFC2_PAO3_F15_sc38	8.69
										GW23_PFC2_PAO3_F15_sc39	GABAergic neurons	GW23_PFC2_PAO3_F15_sc39	810.7
										GW23_PFC2_PAO3_F15_sc40	GABAergic neurons	GW23_PFC2_PAO3_F15_sc40	0
										GW23_PFC2_PAO3_F15_sc41	GABAergic neurons	GW23_PFC2_PAO3_F15_sc41	2.99
										GW23_PFC2_PAO3_F15_sc42	GABAergic neurons	GW23_PFC2_PAO3_F15_sc42	0
										GW23_PFC2_PAO3_F15_sc43	GABAergic neurons	GW23_PFC2_PAO3_F15_sc43	316.23
										GW23_PFC2_PAO3_F15_sc44	Neurons	GW23_PFC2_PAO3_F15_sc44	0
										GW23_PFC2_PAO3_F15_sc45	OPC	GW23_PFC2_PAO3_F15_sc45	350.93
										GW23_PFC2_PAO3_F15_sc46	GABAergic neurons	GW23_PFC2_PAO3_F15_sc46	0
										GW23_PFC2_PAO3_F15_sc47	Neurons	GW23_PFC2_PAO3_F15_sc47	0
										GW23_PFC2_PAO3_F15_sc48	GABAergic neurons	GW23_PFC2_PAO3_F15_sc48	0
										GW23_PFC2_RMF2_F16_sc26	GABAergic neurons	GW23_PFC2_RMF2_F16_sc26	292.21
										GW23_PFC2_RMF2_F16_sc28	Astrocytes	GW23_PFC2_RMF2_F16_sc28	0
										GW23_PFC2_RMF2_F16_sc29	GABAergic neurons	GW23_PFC2_RMF2_F16_sc29	0
										GW23_PFC2_RMF2_F16_sc30	GABAergic neurons	GW23_PFC2_RMF2_F16_sc30	0
										GW23_PFC2_RMF2_F16_sc31	GABAergic neurons	GW23_PFC2_RMF2_F16_sc31	12.7
										GW23_PFC2_RMF2_F16_sc32	GABAergic neurons	GW23_PFC2_RMF2_F16_sc32	0
										GW23_PFC2_RMF2_F16_sc33	Neurons	GW23_PFC2_RMF2_F16_sc33	0
										GW23_PFC2_RMF2_F16_sc36	GABAergic neurons	GW23_PFC2_RMF2_F16_sc36	243.84
										GW23_PFC2_RMF2_F16_sc37	GABAergic neurons	GW23_PFC2_RMF2_F16_sc37	8.72
										GW23_PFC2_RMF2_F16_sc38	GABAergic neurons	GW23_PFC2_RMF2_F16_sc38	0
										GW23_PFC2_RMF2_F16_sc39	GABAergic neurons	GW23_PFC2_RMF2_F16_sc39	0
										GW23_PFC2_RMF2_F16_sc40	GABAergic neurons	GW23_PFC2_RMF2_F16_sc40	68.83
										GW23_PFC2_PAT4_F18_sc51	OPC	GW23_PFC2_PAT4_F18_sc51	0
										GW23_PFC2_PAT4_F18_sc52	Astrocytes	GW23_PFC2_PAT4_F18_sc52	194.02
										GW23_PFC2_PAT4_F18_sc53	GABAergic neurons	GW23_PFC2_PAT4_F18_sc53	138.75
										GW23_PFC2_PAT4_F18_sc54	GABAergic neurons	GW23_PFC2_PAT4_F18_sc54	168.54
										GW23_PFC2_PAT4_F18_sc55	GABAergic neurons	GW23_PFC2_PAT4_F18_sc55	0
										GW23_PFC2_PAT4_F18_sc56	GABAergic neurons	GW23_PFC2_PAT4_F18_sc56	0
										GW23_PFC2_PAT4_F18_sc57	OPC	GW23_PFC2_PAT4_F18_sc57	0
										GW23_PFC2_PAT4_F18_sc58	GABAergic neurons	GW23_PFC2_PAT4_F18_sc58	292.83
										GW23_PFC2_PAT4_F18_sc59	GABAergic neurons	GW23_PFC2_PAT4_F18_sc59	0
										GW23_PFC2_PAT4_F18_sc60	Neurons	GW23_PFC2_PAT4_F18_sc60	171.78
										GW23_PFC2_PAT4_F18_sc61	Neurons	GW23_PFC2_PAT4_F18_sc61	0
										GW23_PFC2_PAT4_F18_sc62	GABAergic neurons	GW23_PFC2_PAT4_F18_sc62	24.37
										GW23_PFC2_PAT4_F18_sc63	GABAergic neurons	GW23_PFC2_PAT4_F18_sc63	0
										GW23_PFC2_PAT4_F18_sc64	OPC	GW23_PFC2_PAT4_F18_sc64	16.58
										GW23_PFC2_PAT4_F18_sc65	GABAergic neurons	GW23_PFC2_PAT4_F18_sc65	0
										GW23_PFC2_PAT4_F18_sc66	GABAergic neurons	GW23_PFC2_PAT4_F18_sc66	0
										GW23_PFC2_PAT4_F18_sc67	GABAergic neurons	GW23_PFC2_PAT4_F18_sc67	345.77
										GW23_PFC2_PAT4_F18_sc68	GABAergic neurons	GW23_PFC2_PAT4_F18_sc68	0
										GW23_PFC2_PAT4_F18_sc69	GABAergic neurons	GW23_PFC2_PAT4_F18_sc69	531.55
										GW23_PFC2_PAT4_F18_sc70	GABAergic neurons	GW23_PFC2_PAT4_F18_sc70	84.26
										GW23_PFC2_PAT4_F18_sc71	GABAergic neurons	GW23_PFC2_PAT4_F18_sc71	0
										GW23_PFC2_PAT4_F18_sc72	GABAergic neurons	GW23_PFC2_PAT4_F18_sc72	174.01
										GW23_PFC2_PAT4_F18_sc73	OPC	GW23_PFC2_PAT4_F18_sc73	78.06
										GW23_PFC2_PAT4_F18_sc74	GABAergic neurons	GW23_PFC2_PAT4_F18_sc74	22.63
										GW23_PFC2_SF1_F23_sc26	GABAergic neurons	GW23_PFC2_SF1_F23_sc26	0
										GW23_PFC2_SF1_F23_sc27	GABAergic neurons	GW23_PFC2_SF1_F23_sc27	0
										GW23_PFC2_SF1_F23_sc28	GABAergic neurons	GW23_PFC2_SF1_F23_sc28	32.98
										GW23_PFC2_SF1_F23_sc29	GABAergic neurons	GW23_PFC2_SF1_F23_sc29	460.24
										GW23_PFC2_SF1_F23_sc30	OPC	GW23_PFC2_SF1_F23_sc30	88.03
										GW23_PFC2_SF1_F23_sc31	Neurons	GW23_PFC2_SF1_F23_sc31	272.76
										GW23_PFC2_SF1_F23_sc32	GABAergic neurons	GW23_PFC2_SF1_F23_sc32	165.13
										GW23_PFC2_SF1_F23_sc35	GABAergic neurons	GW23_PFC2_SF1_F23_sc35	166.12
										GW23_PFC2_SF1_F23_sc36	Neurons	GW23_PFC2_SF1_F23_sc36	123.21
										GW23_PFC2_SF1_F23_sc37	GABAergic neurons	GW23_PFC2_SF1_F23_sc37	0
										GW23_PFC2_SF1_F23_sc38	GABAergic neurons	GW23_PFC2_SF1_F23_sc38	438.74
										GW23_PFC2_SF1_F23_sc39	Neurons	GW23_PFC2_SF1_F23_sc39	261.93
										GW23_PFC2_SF1_F23_sc40	GABAergic neurons	GW23_PFC2_SF1_F23_sc40	315.04
										GW23_PFC2_SF1_F23_sc41	Astrocytes	GW23_PFC2_SF1_F23_sc41	452.32
										GW23_PFC2_SF1_F23_sc42	Neurons	GW23_PFC2_SF1_F23_sc42	588.92
										GW23_PFC2_SF1_F23_sc43	Neurons	GW23_PFC2_SF1_F23_sc43	0
										GW23_PFC2_SF1_F23_sc44	GABAergic neurons	GW23_PFC2_SF1_F23_sc44	0
										GW23_PFC2_SF1_F23_sc45	Astrocytes	GW23_PFC2_SF1_F23_sc45	105.75
										GW23_PFC2_SF1_F23_sc46	OPC	GW23_PFC2_SF1_F23_sc46	107.29
										GW23_PFC2_SF1_F23_sc47	GABAergic neurons	GW23_PFC2_SF1_F23_sc47	0
										GW23_PFC2_SF1_F23_sc48	GABAergic neurons	GW23_PFC2_SF1_F23_sc48	8.99
										GW23_PFC2_SF1_F23_sc49	GABAergic neurons	GW23_PFC2_SF1_F23_sc49	12.7
										GW23_PFC2_SF1_F23_sc50	GABAergic neurons	GW23_PFC2_SF1_F23_sc50	2.72
										GW23_PFC2_PAO1_F24_sc2	GABAergic neurons	GW23_PFC2_PAO1_F24_sc2	7.4
										GW23_PFC2_PAO1_F24_sc3	GABAergic neurons	GW23_PFC2_PAO1_F24_sc3	0
										GW23_PFC2_PAO1_F24_sc4	GABAergic neurons	GW23_PFC2_PAO1_F24_sc4	185.32
										GW23_PFC2_PAO1_F24_sc6	GABAergic neurons	GW23_PFC2_PAO1_F24_sc6	0
										GW23_PFC2_PAO1_F24_sc7	GABAergic neurons	GW23_PFC2_PAO1_F24_sc7	130.14
										GW23_PFC2_PAO1_F24_sc8	OPC	GW23_PFC2_PAO1_F24_sc8	0
										GW23_PFC2_PAO1_F24_sc9	GABAergic neurons	GW23_PFC2_PAO1_F24_sc9	266.05
										GW23_PFC2_PAO1_F24_sc10	GABAergic neurons	GW23_PFC2_PAO1_F24_sc10	0
										GW23_PFC2_PAO1_F24_sc11	GABAergic neurons	GW23_PFC2_PAO1_F24_sc11	767.8
										GW23_PFC2_PAO1_F24_sc12	Neurons	GW23_PFC2_PAO1_F24_sc12	0
										GW23_PFC2_PAO1_F24_sc13	GABAergic neurons	GW23_PFC2_PAO1_F24_sc13	0
										GW23_PFC2_PAO1_F24_sc14	GABAergic neurons	GW23_PFC2_PAO1_F24_sc14	17.56
										GW23_PFC2_PAO1_F24_sc15	GABAergic neurons	GW23_PFC2_PAO1_F24_sc15	0
										GW23_PFC2_PAO1_F24_sc16	GABAergic neurons	GW23_PFC2_PAO1_F24_sc16	0
										GW23_PFC2_PAO1_F24_sc17	GABAergic neurons	GW23_PFC2_PAO1_F24_sc17	0
										GW23_PFC2_PAO1_F24_sc18	GABAergic neurons	GW23_PFC2_PAO1_F24_sc18	0
										GW23_PFC2_PAO1_F24_sc19	GABAergic neurons	GW23_PFC2_PAO1_F24_sc19	0
										GW23_PFC2_PAO1_F24_sc20	GABAergic neurons	GW23_PFC2_PAO1_F24_sc20	743.57
										GW23_PFC2_PAO1_F24_sc21	Neurons	GW23_PFC2_PAO1_F24_sc21	0
										GW23_PFC2_PAO1_F24_sc22	GABAergic neurons	GW23_PFC2_PAO1_F24_sc22	0
										GW23_PFC2_PAO1_F24_sc24	GABAergic neurons	GW23_PFC2_PAO1_F24_sc24	0
										GW23_PFC2_PAO1_F24_sc25	Neurons	GW23_PFC2_PAO1_F24_sc25	4.14
										GW23_PFC2_RMF1_F24_sc26	Neurons	GW23_PFC2_RMF1_F24_sc26	288.15
										GW23_PFC2_RMF1_F24_sc28	Neurons	GW23_PFC2_RMF1_F24_sc28	19.71
										GW23_PFC2_RMF1_F24_sc29	GABAergic neurons	GW23_PFC2_RMF1_F24_sc29	0
										GW23_PFC2_RMF1_F24_sc30	GABAergic neurons	GW23_PFC2_RMF1_F24_sc30	0
										GW23_PFC2_RMF1_F24_sc31	Neurons	GW23_PFC2_RMF1_F24_sc31	0
										GW23_PFC2_RMF1_F24_sc32	GABAergic neurons	GW23_PFC2_RMF1_F24_sc32	8.53
										GW23_PFC2_RMF1_F24_sc33	GABAergic neurons	GW23_PFC2_RMF1_F24_sc33	18.1
										GW23_PFC2_RMF1_F24_sc35	Neurons	GW23_PFC2_RMF1_F24_sc35	102.26
										GW23_PFC2_RMF1_F24_sc36	GABAergic neurons	GW23_PFC2_RMF1_F24_sc36	4.54
										GW23_PFC2_RMF1_F24_sc37	GABAergic neurons	GW23_PFC2_RMF1_F24_sc37	8.71
										GW23_PFC2_RMF1_F24_sc38	Neurons	GW23_PFC2_RMF1_F24_sc38	540.55
										GW23_PFC2_RMF1_F24_sc39	Neurons	GW23_PFC2_RMF1_F24_sc39	5.3
										GW23_PFC2_RMF1_F24_sc40	Neurons	GW23_PFC2_RMF1_F24_sc40	0
										GW23_PFC2_RMF1_F24_sc41	GABAergic neurons	GW23_PFC2_RMF1_F24_sc41	1049.2
										GW23_PFC2_RMF1_F24_sc42	GABAergic neurons	GW23_PFC2_RMF1_F24_sc42	973.47
										GW23_PFC2_RMF1_F24_sc43	Neurons	GW23_PFC2_RMF1_F24_sc43	0
										GW23_PFC2_RMF1_F24_sc44	Neurons	GW23_PFC2_RMF1_F24_sc44	208.91
										GW23_PFC2_RMF1_F24_sc45	Neurons	GW23_PFC2_RMF1_F24_sc45	0
										GW23_PFC2_RMF1_F24_sc46	GABAergic neurons	GW23_PFC2_RMF1_F24_sc46	0
										GW23_PFC2_RMF1_F24_sc47	GABAergic neurons	GW23_PFC2_RMF1_F24_sc47	0
										GW23_PFC2_RMF1_F24_sc48	GABAergic neurons	GW23_PFC2_RMF1_F24_sc48	406.5
										GW23_PFC2_RMF1_F24_sc49	GABAergic neurons	GW23_PFC2_RMF1_F24_sc49	0
										GW23_PFC2_RMF1_F24_sc50	GABAergic neurons	GW23_PFC2_RMF1_F24_sc50	42.55
										GW23_PFC2_SF2_F25_sc26	GABAergic neurons	GW23_PFC2_SF2_F25_sc26	0
										GW23_PFC2_SF2_F25_sc27	Neurons	GW23_PFC2_SF2_F25_sc27	436.35
										GW23_PFC2_SF2_F25_sc28	GABAergic neurons	GW23_PFC2_SF2_F25_sc28	0
										GW23_PFC2_SF2_F25_sc29	Neurons	GW23_PFC2_SF2_F25_sc29	0
										GW23_PFC2_SF2_F25_sc30	GABAergic neurons	GW23_PFC2_SF2_F25_sc30	343.72
										GW23_PFC2_SF2_F25_sc33	GABAergic neurons	GW23_PFC2_SF2_F25_sc33	0
										GW23_PFC2_SF2_F25_sc35	Neurons	GW23_PFC2_SF2_F25_sc35	91.88
										GW23_PFC2_SF2_F25_sc36	GABAergic neurons	GW23_PFC2_SF2_F25_sc36	0
										GW23_PFC2_SF2_F25_sc37	GABAergic neurons	GW23_PFC2_SF2_F25_sc37	356.01
										GW23_PFC2_SF2_F25_sc39	GABAergic neurons	GW23_PFC2_SF2_F25_sc39	0
										GW23_PFC2_SF2_F25_sc40	GABAergic neurons	GW23_PFC2_SF2_F25_sc40	0
										GW23_PFC2_SF2_F25_sc41	Neurons	GW23_PFC2_SF2_F25_sc41	0
										GW23_PFC2_SF2_F25_sc42	GABAergic neurons	GW23_PFC2_SF2_F25_sc42	0
										GW23_PFC2_SF2_F25_sc43	GABAergic neurons	GW23_PFC2_SF2_F25_sc43	0
										GW23_PFC2_SF2_F25_sc44	GABAergic neurons	GW23_PFC2_SF2_F25_sc44	0
										GW23_PFC2_SF2_F25_sc45	GABAergic neurons	GW23_PFC2_SF2_F25_sc45	0
										GW23_PFC2_SF2_F25_sc46	GABAergic neurons	GW23_PFC2_SF2_F25_sc46	0
										GW23_PFC2_SF2_F25_sc47	OPC	GW23_PFC2_SF2_F25_sc47	3.25
										GW23_PFC2_SF2_F25_sc48	GABAergic neurons	GW23_PFC2_SF2_F25_sc48	0
										GW23_PFC2_SF2_F25_sc49	GABAergic neurons	GW23_PFC2_SF2_F25_sc49	0
										GW23_PFC2_SF2_F25_sc50	GABAergic neurons	GW23_PFC2_SF2_F25_sc50	0
										GW23_PFC2_RMF3_F10_sc81	Microglia	GW23_PFC2_RMF3_F10_sc81	0
										GW23_PFC2_PAO3_F15_sc35	Microglia	GW23_PFC2_PAO3_F15_sc35	5.6
										GW23_PFC2_PAO3_F15_sc49	Microglia	GW23_PFC2_PAO3_F15_sc49	0
										GW23_PFC2_PAO3_F15_sc50	Microglia	GW23_PFC2_PAO3_F15_sc50	0
										GW23_PFC2_RMF2_F16_sc27	Microglia	GW23_PFC2_RMF2_F16_sc27	0
										GW23_PFC2_RMF2_F16_sc41	Microglia	GW23_PFC2_RMF2_F16_sc41	0
										GW23_PFC2_SF1_F23_sc33	Microglia	GW23_PFC2_SF1_F23_sc33	423.87
										GW23_PFC2_PAO1_F24_sc5	Microglia	GW23_PFC2_PAO1_F24_sc5	0
										GW23_PFC2_SF2_F25_sc31	Microglia	GW23_PFC2_SF2_F25_sc31	0
										GW23_PFC2_SF2_F25_sc38	Microglia	GW23_PFC2_SF2_F25_sc38	0
										GW26_PFC1_M4_sc1	GABAergic neurons	GW26_PFC1_M4_sc1	135.69
										GW26_PFC1_M4_sc2	OPC	GW26_PFC1_M4_sc2	10.19
										GW26_PFC1_M4_sc3	GABAergic neurons	GW26_PFC1_M4_sc3	67.49
										GW26_PFC1_M4_sc4	GABAergic neurons	GW26_PFC1_M4_sc4	0
										GW26_PFC1_M4_sc6	GABAergic neurons	GW26_PFC1_M4_sc6	0
										GW26_PFC1_M4_sc7	GABAergic neurons	GW26_PFC1_M4_sc7	564.32
										GW26_PFC1_M4_sc8	GABAergic neurons	GW26_PFC1_M4_sc8	338.65
										GW26_PFC1_M4_sc9	Astrocytes	GW26_PFC1_M4_sc9	0
										GW26_PFC1_M4_sc11	GABAergic neurons	GW26_PFC1_M4_sc11	0
										GW26_PFC1_M4_sc12	GABAergic neurons	GW26_PFC1_M4_sc12	10.05
										GW26_PFC1_O4_sc2	OPC	GW26_PFC1_O4_sc2	0
										GW26_PFC1_O4_sc3	Astrocytes	GW26_PFC1_O4_sc3	0
										GW26_PFC1_O4_sc4	Neurons	GW26_PFC1_O4_sc4	0
										GW26_PFC1_O4_sc5	Astrocytes	GW26_PFC1_O4_sc5	0
										GW26_PFC1_O4_sc6	GABAergic neurons	GW26_PFC1_O4_sc6	0
										GW26_PFC1_O4_sc7	GABAergic neurons	GW26_PFC1_O4_sc7	0
										GW26_PFC1_O4_sc8	Neurons	GW26_PFC1_O4_sc8	0
										GW26_PFC1_O4_sc10	Neurons	GW26_PFC1_O4_sc10	0
										GW26_PFC1_O4_sc11	GABAergic neurons	GW26_PFC1_O4_sc11	0
										GW26_PFC1_O4_sc12	GABAergic neurons	GW26_PFC1_O4_sc12	0
										GW26_PFC1_H4_sc1	GABAergic neurons	GW26_PFC1_H4_sc1	0
										GW26_PFC1_H4_sc3	OPC	GW26_PFC1_H4_sc3	0
										GW26_PFC1_H4_sc4	Neurons	GW26_PFC1_H4_sc4	252.03
										GW26_PFC1_H4_sc6	GABAergic neurons	GW26_PFC1_H4_sc6	0
										GW26_PFC1_H4_sc7	OPC	GW26_PFC1_H4_sc7	302.68
										GW26_PFC1_H4_sc8	Astrocytes	GW26_PFC1_H4_sc8	11.9
										GW26_PFC1_H4_sc9	GABAergic neurons	GW26_PFC1_H4_sc9	0
										GW26_PFC1_H4_sc10	OPC	GW26_PFC1_H4_sc10	7.93
										GW26_PFC1_R4_sc1	GABAergic neurons	GW26_PFC1_R4_sc1	336.13
										GW26_PFC1_R4_sc2	GABAergic neurons	GW26_PFC1_R4_sc2	15.5
										GW26_PFC1_R4_sc3	GABAergic neurons	GW26_PFC1_R4_sc3	18.13
										GW26_PFC1_R4_sc4	GABAergic neurons	GW26_PFC1_R4_sc4	119.08
										GW26_PFC1_R4_sc5	GABAergic neurons	GW26_PFC1_R4_sc5	11.62
										GW26_PFC1_R4_sc6	GABAergic neurons	GW26_PFC1_R4_sc6	45.75
										GW26_PFC1_R4_sc7	GABAergic neurons	GW26_PFC1_R4_sc7	6.75
										GW26_PFC1_R4_sc8	GABAergic neurons	GW26_PFC1_R4_sc8	28.97
										GW26_PFC1_Q4_sc1	Neurons	GW26_PFC1_Q4_sc1	0
										GW26_PFC1_Q4_sc2	GABAergic neurons	GW26_PFC1_Q4_sc2	91.08
										GW26_PFC1_Q4_sc3	GABAergic neurons	GW26_PFC1_Q4_sc3	0
										GW26_PFC1_Q4_sc4	GABAergic neurons	GW26_PFC1_Q4_sc4	31.4
										GW26_PFC1_Q4_sc6	Neurons	GW26_PFC1_Q4_sc6	0
										GW26_PFC1_Q4_sc7	GABAergic neurons	GW26_PFC1_Q4_sc7	0
										GW26_PFC1_Q4_sc8	GABAergic neurons	GW26_PFC1_Q4_sc8	95.33
										GW26_PFC1_J4_sc1	GABAergic neurons	GW26_PFC1_J4_sc1	163.12
										GW26_PFC1_J4_sc2	Neurons	GW26_PFC1_J4_sc2	604.16
										GW26_PFC1_J4_sc6	GABAergic neurons	GW26_PFC1_J4_sc6	0
										GW26_PFC1_J4_sc7	GABAergic neurons	GW26_PFC1_J4_sc7	0
										GW26_PFC1_J4_sc8	GABAergic neurons	GW26_PFC1_J4_sc8	0
										GW26_PFC1_I4_sc1	GABAergic neurons	GW26_PFC1_I4_sc1	2075.93
										GW26_PFC1_I4_sc3	Neurons	GW26_PFC1_I4_sc3	63.34
										GW26_PFC1_I4_sc4	Neurons	GW26_PFC1_I4_sc4	13.11
										GW26_PFC1_I4_sc5	Neurons	GW26_PFC1_I4_sc5	0
										GW26_PFC1_I4_sc6	GABAergic neurons	GW26_PFC1_I4_sc6	0
										GW26_PFC1_Q3_sc1	GABAergic neurons	GW26_PFC1_Q3_sc1	147.65
										GW26_PFC1_Q3_sc2	GABAergic neurons	GW26_PFC1_Q3_sc2	15.88
										GW26_PFC1_Q3_sc3	GABAergic neurons	GW26_PFC1_Q3_sc3	0
										GW26_PFC1_Q3_sc4	GABAergic neurons	GW26_PFC1_Q3_sc4	159.15
										GW26_PFC1_Q3_sc5	GABAergic neurons	GW26_PFC1_Q3_sc5	10.59
										GW26_PFC1_Q3_sc6	GABAergic neurons	GW26_PFC1_Q3_sc6	0
										GW26_PFC1_Q3_sc7	Neurons	GW26_PFC1_Q3_sc7	0
										GW26_PFC1_Q3_sc8	GABAergic neurons	GW26_PFC1_Q3_sc8	0
										GW26_PFC1_Q3_sc9	GABAergic neurons	GW26_PFC1_Q3_sc9	314.65
										GW26_PFC1_Q3_sc10	GABAergic neurons	GW26_PFC1_Q3_sc10	0
										GW26_PFC1_Q3_sc11	GABAergic neurons	GW26_PFC1_Q3_sc11	19
										GW26_PFC1_Q3_sc12	Neurons	GW26_PFC1_Q3_sc12	5.32
										GW26_PFC1_Q3_sc13	GABAergic neurons	GW26_PFC1_Q3_sc13	0
										GW26_PFC1_Q3_sc14	GABAergic neurons	GW26_PFC1_Q3_sc14	600.76
										GW26_PFC1_Q3_sc15	Neurons	GW26_PFC1_Q3_sc15	52.84
										GW26_PFC1_Q3_sc16	Neurons	GW26_PFC1_Q3_sc16	9.24
										GW26_PFC1_Q3_sc17	Neurons	GW26_PFC1_Q3_sc17	317.55
										GW26_PFC1_Q3_sc18	Neurons	GW26_PFC1_Q3_sc18	454.39
										GW26_PFC1_Q3_sc19	GABAergic neurons	GW26_PFC1_Q3_sc19	11.72
										GW26_PFC1_Q3_sc20	GABAergic neurons	GW26_PFC1_Q3_sc20	37.54
										GW26_PFC1_Q3_sc21	Neurons	GW26_PFC1_Q3_sc21	11.38
										GW26_PFC1_Q3_sc22	GABAergic neurons	GW26_PFC1_Q3_sc22	13.09
										GW26_PFC1_Q3_sc23	Astrocytes	GW26_PFC1_Q3_sc23	0
										GW26_PFC1_Q3_sc24	GABAergic neurons	GW26_PFC1_Q3_sc24	0
										GW26_PFC1_N4_sc1	OPC	GW26_PFC1_N4_sc1	103.67
										GW26_PFC1_N4_sc2	Neurons	GW26_PFC1_N4_sc2	0
										GW26_PFC1_N4_sc3	GABAergic neurons	GW26_PFC1_N4_sc3	4.96
										GW26_PFC1_N4_sc4	OPC	GW26_PFC1_N4_sc4	5.45
										GW26_PFC1_N4_sc5	Astrocytes	GW26_PFC1_N4_sc5	99.5
										GW26_PFC1_N4_sc6	Astrocytes	GW26_PFC1_N4_sc6	153.2
										GW26_PFC1_N4_sc7	GABAergic neurons	GW26_PFC1_N4_sc7	2.75
										GW26_PFC1_N4_sc8	OPC	GW26_PFC1_N4_sc8	0
										GW26_PFC1_N4_sc9	OPC	GW26_PFC1_N4_sc9	322.11
										GW26_PFC1_N4_sc10	GABAergic neurons	GW26_PFC1_N4_sc10	213.8
										GW26_PFC1_N4_sc12	OPC	GW26_PFC1_N4_sc12	431.97
										GW26_PFC1_N4_sc13	OPC	GW26_PFC1_N4_sc13	0
										GW26_PFC1_N4_sc14	OPC	GW26_PFC1_N4_sc14	3.82
										GW26_PFC1_N4_sc15	GABAergic neurons	GW26_PFC1_N4_sc15	0
										GW26_PFC1_N4_sc16	OPC	GW26_PFC1_N4_sc16	0
										GW26_PFC1_G3_sc1	GABAergic neurons	GW26_PFC1_G3_sc1	0
										GW26_PFC1_G3_sc2	GABAergic neurons	GW26_PFC1_G3_sc2	301.42
										GW26_PFC1_G3_sc3	Astrocytes	GW26_PFC1_G3_sc3	56.87
										GW26_PFC1_G3_sc4	OPC	GW26_PFC1_G3_sc4	17.61
										GW26_PFC1_G3_sc5	OPC	GW26_PFC1_G3_sc5	90.55
										GW26_PFC1_G3_sc6	OPC	GW26_PFC1_G3_sc6	0
										GW26_PFC1_G3_sc7	Neurons	GW26_PFC1_G3_sc7	0
										GW26_PFC1_G3_sc8	GABAergic neurons	GW26_PFC1_G3_sc8	215.85
										GW26_PFC1_G3_sc9	Astrocytes	GW26_PFC1_G3_sc9	2.15
										GW26_PFC1_G3_sc10	Astrocytes	GW26_PFC1_G3_sc10	126.71
										GW26_PFC1_G3_sc11	OPC	GW26_PFC1_G3_sc11	0
										GW26_PFC1_G3_sc12	GABAergic neurons	GW26_PFC1_G3_sc12	0
										GW26_PFC1_G3_sc13	OPC	GW26_PFC1_G3_sc13	0
										GW26_PFC1_G3_sc14	OPC	GW26_PFC1_G3_sc14	5.13
										GW26_PFC1_G3_sc15	Astrocytes	GW26_PFC1_G3_sc15	9.53
										GW26_PFC1_G3_sc16	GABAergic neurons	GW26_PFC1_G3_sc16	249.1
										GW26_PFC1_J2_sc1	GABAergic neurons	GW26_PFC1_J2_sc1	109.67
										GW26_PFC1_J2_sc2	Neurons	GW26_PFC1_J2_sc2	90.42
										GW26_PFC1_J2_sc3	GABAergic neurons	GW26_PFC1_J2_sc3	478.25
										GW26_PFC1_J2_sc4	GABAergic neurons	GW26_PFC1_J2_sc4	0
										GW26_PFC1_J2_sc5	GABAergic neurons	GW26_PFC1_J2_sc5	586.38
										GW26_PFC1_J2_sc6	GABAergic neurons	GW26_PFC1_J2_sc6	59.38
										GW26_PFC1_J2_sc7	GABAergic neurons	GW26_PFC1_J2_sc7	117.73
										GW26_PFC1_J2_sc8	GABAergic neurons	GW26_PFC1_J2_sc8	39.33
										GW26_PFC1_J2_sc9	GABAergic neurons	GW26_PFC1_J2_sc9	0
										GW26_PFC1_J2_sc10	GABAergic neurons	GW26_PFC1_J2_sc10	0
										GW26_PFC1_J2_sc11	GABAergic neurons	GW26_PFC1_J2_sc11	815.37
										GW26_PFC1_J2_sc13	GABAergic neurons	GW26_PFC1_J2_sc13	255.58
										GW26_PFC1_J2_sc15	GABAergic neurons	GW26_PFC1_J2_sc15	78.07
										GW26_PFC1_J2_sc16	Neurons	GW26_PFC1_J2_sc16	7.16
										GW26_PFC1_L1_sc2	GABAergic neurons	GW26_PFC1_L1_sc2	14.06
										GW26_PFC1_L1_sc3	GABAergic neurons	GW26_PFC1_L1_sc3	0
										GW26_PFC1_L1_sc4	GABAergic neurons	GW26_PFC1_L1_sc4	2.65
										GW26_PFC1_L1_sc5	GABAergic neurons	GW26_PFC1_L1_sc5	61.66
										GW26_PFC1_L1_sc6	GABAergic neurons	GW26_PFC1_L1_sc6	0
										GW26_PFC1_L1_sc8	GABAergic neurons	GW26_PFC1_L1_sc8	8.39
										GW26_PFC1_L1_sc9	GABAergic neurons	GW26_PFC1_L1_sc9	133.61
										GW26_PFC1_L1_sc11	GABAergic neurons	GW26_PFC1_L1_sc11	42.47
										GW26_PFC1_L1_sc12	GABAergic neurons	GW26_PFC1_L1_sc12	0
										GW26_PFC1_L1_sc13	GABAergic neurons	GW26_PFC1_L1_sc13	37.66
										GW26_PFC1_L1_sc14	GABAergic neurons	GW26_PFC1_L1_sc14	3.94
										GW26_PFC1_L1_sc16	GABAergic neurons	GW26_PFC1_L1_sc16	180.79
										GW26_PFC1_H2_sc1	GABAergic neurons	GW26_PFC1_H2_sc1	73.48
										GW26_PFC1_H2_sc2	GABAergic neurons	GW26_PFC1_H2_sc2	11.44
										GW26_PFC1_H2_sc3	Astrocytes	GW26_PFC1_H2_sc3	0
										GW26_PFC1_H2_sc4	GABAergic neurons	GW26_PFC1_H2_sc4	0
										GW26_PFC1_H2_sc5	Astrocytes	GW26_PFC1_H2_sc5	104.83
										GW26_PFC1_H2_sc6	GABAergic neurons	GW26_PFC1_H2_sc6	0
										GW26_PFC1_H2_sc7	GABAergic neurons	GW26_PFC1_H2_sc7	0
										GW26_PFC1_H2_sc8	GABAergic neurons	GW26_PFC1_H2_sc8	29.1
										GW26_PFC1_H2_sc11	GABAergic neurons	GW26_PFC1_H2_sc11	0
										GW26_PFC1_H2_sc12	GABAergic neurons	GW26_PFC1_H2_sc12	237.43
										GW26_PFC1_H2_sc13	GABAergic neurons	GW26_PFC1_H2_sc13	339.86
										GW26_PFC1_H2_sc14	GABAergic neurons	GW26_PFC1_H2_sc14	218.93
										GW26_PFC1_H2_sc15	GABAergic neurons	GW26_PFC1_H2_sc15	11.81
										GW26_PFC1_H2_sc16	GABAergic neurons	GW26_PFC1_H2_sc16	0
										GW26_PFC1_K4_sc2	Stem cells	GW26_PFC1_K4_sc2	0
										GW26_PFC1_K4_sc3	Neurons	GW26_PFC1_K4_sc3	0
										GW26_PFC1_K4_sc4	GABAergic neurons	GW26_PFC1_K4_sc4	0
										GW26_PFC1_K4_sc5	GABAergic neurons	GW26_PFC1_K4_sc5	0
										GW26_PFC1_K4_sc6	Neurons	GW26_PFC1_K4_sc6	0
										GW26_PFC1_K4_sc7	Neurons	GW26_PFC1_K4_sc7	0
										GW26_PFC1_K4_sc8	Neurons	GW26_PFC1_K4_sc8	268.67
										GW26_PFC1_I3_sc1	GABAergic neurons	GW26_PFC1_I3_sc1	415.23
										GW26_PFC1_I3_sc2	GABAergic neurons	GW26_PFC1_I3_sc2	0
										GW26_PFC1_I3_sc3	Neurons	GW26_PFC1_I3_sc3	0
										GW26_PFC1_I3_sc4	GABAergic neurons	GW26_PFC1_I3_sc4	201.37
										GW26_PFC1_I3_sc5	GABAergic neurons	GW26_PFC1_I3_sc5	117.89
										GW26_PFC1_I3_sc7	GABAergic neurons	GW26_PFC1_I3_sc7	6.92
										GW26_PFC1_I3_sc8	GABAergic neurons	GW26_PFC1_I3_sc8	0
										GW26_PFC1_K4_sc9	Neurons	GW26_PFC1_K4_sc9	0
										GW26_PFC1_K4_sc11	Neurons	GW26_PFC1_K4_sc11	0
										GW26_PFC1_K4_sc12	GABAergic neurons	GW26_PFC1_K4_sc12	534.43
										GW26_PFC1_K4_sc13	Neurons	GW26_PFC1_K4_sc13	2.02
										GW26_PFC1_K4_sc14	GABAergic neurons	GW26_PFC1_K4_sc14	502.94
										GW26_PFC1_K4_sc15	GABAergic neurons	GW26_PFC1_K4_sc15	7.87
										GW26_PFC1_K4_sc16	Neurons	GW26_PFC1_K4_sc16	21.54
										GW26_PFC1_H1_sc1	GABAergic neurons	GW26_PFC1_H1_sc1	8.33
										GW26_PFC1_H1_sc2	GABAergic neurons	GW26_PFC1_H1_sc2	12.88
										GW26_PFC1_H1_sc3	GABAergic neurons	GW26_PFC1_H1_sc3	0
										GW26_PFC1_H1_sc4	GABAergic neurons	GW26_PFC1_H1_sc4	12.33
										GW26_PFC1_H1_sc5	GABAergic neurons	GW26_PFC1_H1_sc5	0
										GW26_PFC1_H1_sc8	GABAergic neurons	GW26_PFC1_H1_sc8	0
										GW26_PFC1_H1_sc9	GABAergic neurons	GW26_PFC1_H1_sc9	0
										GW26_PFC1_H1_sc11	GABAergic neurons	GW26_PFC1_H1_sc11	172.46
										GW26_PFC1_H1_sc12	GABAergic neurons	GW26_PFC1_H1_sc12	416.07
										GW26_PFC1_H1_sc13	GABAergic neurons	GW26_PFC1_H1_sc13	234.44
										GW26_PFC1_H1_sc15	GABAergic neurons	GW26_PFC1_H1_sc15	176.3
										GW26_PFC1_H1_sc16	GABAergic neurons	GW26_PFC1_H1_sc16	28.97
										GW26_PFC1_H3_sc2	GABAergic neurons	GW26_PFC1_H3_sc2	268.97
										GW26_PFC1_H3_sc3	GABAergic neurons	GW26_PFC1_H3_sc3	14.79
										GW26_PFC1_H3_sc4	GABAergic neurons	GW26_PFC1_H3_sc4	17.1
										GW26_PFC1_H3_sc5	GABAergic neurons	GW26_PFC1_H3_sc5	240.74
										GW26_PFC1_H3_sc6	GABAergic neurons	GW26_PFC1_H3_sc6	53.33
										GW26_PFC1_H3_sc7	GABAergic neurons	GW26_PFC1_H3_sc7	291.8
										GW26_PFC1_H3_sc8	Astrocytes	GW26_PFC1_H3_sc8	7.55
										GW26_PFC1_H3_sc9	Astrocytes	GW26_PFC1_H3_sc9	57.4
										GW26_PFC1_H3_sc10	GABAergic neurons	GW26_PFC1_H3_sc10	349.79
										GW26_PFC1_H3_sc11	GABAergic neurons	GW26_PFC1_H3_sc11	0
										GW26_PFC1_H3_sc12	Neurons	GW26_PFC1_H3_sc12	7.84
										GW26_PFC1_H3_sc13	GABAergic neurons	GW26_PFC1_H3_sc13	126.08
										GW26_PFC1_H3_sc14	GABAergic neurons	GW26_PFC1_H3_sc14	34.29
										GW26_PFC1_H3_sc15	GABAergic neurons	GW26_PFC1_H3_sc15	103.56
										GW26_PFC1_H3_sc16	GABAergic neurons	GW26_PFC1_H3_sc16	221.05
										GW26_PFC1_G2_sc1	GABAergic neurons	GW26_PFC1_G2_sc1	5.5
										GW26_PFC1_G2_sc2	Neurons	GW26_PFC1_G2_sc2	975.82
										GW26_PFC1_G2_sc3	Astrocytes	GW26_PFC1_G2_sc3	182.96
										GW26_PFC1_G2_sc4	Astrocytes	GW26_PFC1_G2_sc4	4.22
										GW26_PFC1_G2_sc5	GABAergic neurons	GW26_PFC1_G2_sc5	50.95
										GW26_PFC1_G2_sc6	GABAergic neurons	GW26_PFC1_G2_sc6	9.88
										GW26_PFC1_G2_sc7	GABAergic neurons	GW26_PFC1_G2_sc7	0
										GW26_PFC1_G2_sc8	Neurons	GW26_PFC1_G2_sc8	298.7
										GW26_PFC1_G2_sc9	Astrocytes	GW26_PFC1_G2_sc9	298.7
										GW26_PFC1_G2_sc10	Astrocytes	GW26_PFC1_G2_sc10	4.39
										GW26_PFC1_G2_sc11	OPC	GW26_PFC1_G2_sc11	256.87
										GW26_PFC1_G2_sc12	OPC	GW26_PFC1_G2_sc12	0
										GW26_PFC1_G2_sc13	Neurons	GW26_PFC1_G2_sc13	6.71
										GW26_PFC1_G2_sc14	Astrocytes	GW26_PFC1_G2_sc14	0
										GW26_PFC1_G2_sc15	OPC	GW26_PFC1_G2_sc15	5.16
										GW26_PFC1_G2_sc16	GABAergic neurons	GW26_PFC1_G2_sc16	0
										GW26_PFC1_N2_sc1	OPC	GW26_PFC1_N2_sc1	457.08
										GW26_PFC1_N2_sc2	GABAergic neurons	GW26_PFC1_N2_sc2	133.05
										GW26_PFC1_N2_sc3	GABAergic neurons	GW26_PFC1_N2_sc3	360.72
										GW26_PFC1_N2_sc4	GABAergic neurons	GW26_PFC1_N2_sc4	5.29
										GW26_PFC1_N2_sc5	GABAergic neurons	GW26_PFC1_N2_sc5	127.74
										GW26_PFC1_N2_sc6	GABAergic neurons	GW26_PFC1_N2_sc6	0
										GW26_PFC1_N2_sc7	GABAergic neurons	GW26_PFC1_N2_sc7	140.89
										GW26_PFC1_N2_sc9	OPC	GW26_PFC1_N2_sc9	23.51
										GW26_PFC1_N2_sc11	GABAergic neurons	GW26_PFC1_N2_sc11	0
										GW26_PFC1_N2_sc12	GABAergic neurons	GW26_PFC1_N2_sc12	684.85
										GW26_PFC1_N2_sc14	OPC	GW26_PFC1_N2_sc14	5.63
										GW26_PFC1_N2_sc15	Astrocytes	GW26_PFC1_N2_sc15	11.16
										GW26_PFC1_N2_sc16	GABAergic neurons	GW26_PFC1_N2_sc16	0
										GW26_PFC1_N3_sc1	GABAergic neurons	GW26_PFC1_N3_sc1	50.07
										GW26_PFC1_N3_sc2	Astrocytes	GW26_PFC1_N3_sc2	3.1
										GW26_PFC1_N3_sc3	OPC	GW26_PFC1_N3_sc3	104.49
										GW26_PFC1_N3_sc4	Neurons	GW26_PFC1_N3_sc4	639.38
										GW26_PFC1_N3_sc6	GABAergic neurons	GW26_PFC1_N3_sc6	96.22
										GW26_PFC1_N3_sc8	GABAergic neurons	GW26_PFC1_N3_sc8	0
										GW26_PFC1_N3_sc10	GABAergic neurons	GW26_PFC1_N3_sc10	0
										GW26_PFC1_N3_sc13	GABAergic neurons	GW26_PFC1_N3_sc13	0
										GW26_PFC1_N3_sc14	Astrocytes	GW26_PFC1_N3_sc14	10.7
										GW26_PFC1_N3_sc15	GABAergic neurons	GW26_PFC1_N3_sc15	0
										GW26_PFC1_N3_sc16	GABAergic neurons	GW26_PFC1_N3_sc16	0
										GW26_PFC1_G4_sc1	Astrocytes	GW26_PFC1_G4_sc1	1.76
										GW26_PFC1_G4_sc2	GABAergic neurons	GW26_PFC1_G4_sc2	0
										GW26_PFC1_G4_sc3	GABAergic neurons	GW26_PFC1_G4_sc3	0
										GW26_PFC1_G4_sc4	GABAergic neurons	GW26_PFC1_G4_sc4	9.02
										GW26_PFC1_G4_sc5	Neurons	GW26_PFC1_G4_sc5	0
										GW26_PFC1_G4_sc6	GABAergic neurons	GW26_PFC1_G4_sc6	0
										GW26_PFC1_G4_sc8	GABAergic neurons	GW26_PFC1_G4_sc8	0
										GW26_PFC1_I1_sc1	GABAergic neurons	GW26_PFC1_I1_sc1	0
										GW26_PFC1_I1_sc2	GABAergic neurons	GW26_PFC1_I1_sc2	0
										GW26_PFC1_I1_sc3	GABAergic neurons	GW26_PFC1_I1_sc3	0
										GW26_PFC1_I1_sc4	GABAergic neurons	GW26_PFC1_I1_sc4	0
										GW26_PFC1_I1_sc6	GABAergic neurons	GW26_PFC1_I1_sc6	0
										GW26_PFC1_I1_sc7	GABAergic neurons	GW26_PFC1_I1_sc7	133.55
										GW26_PFC1_I1_sc8	GABAergic neurons	GW26_PFC1_I1_sc8	0
										GW26_PFC1_I1_sc9	GABAergic neurons	GW26_PFC1_I1_sc9	3.17
										GW26_PFC1_I1_sc10	Neurons	GW26_PFC1_I1_sc10	0
										GW26_PFC1_I1_sc11	GABAergic neurons	GW26_PFC1_I1_sc11	9.63
										GW26_PFC1_I1_sc12	GABAergic neurons	GW26_PFC1_I1_sc12	12.25
										GW26_PFC1_I1_sc13	GABAergic neurons	GW26_PFC1_I1_sc13	424.9
										GW26_PFC1_I1_sc14	GABAergic neurons	GW26_PFC1_I1_sc14	10.97
										GW26_PFC1_I1_sc15	GABAergic neurons	GW26_PFC1_I1_sc15	18.42
										GW26_PFC1_I1_sc16	GABAergic neurons	GW26_PFC1_I1_sc16	6.63
										GW26_PFC1_M1_sc1	Neurons	GW26_PFC1_M1_sc1	0
										GW26_PFC1_M1_sc2	Neurons	GW26_PFC1_M1_sc2	18.27
										GW26_PFC1_M1_sc3	OPC	GW26_PFC1_M1_sc3	15.6
										GW26_PFC1_M1_sc4	GABAergic neurons	GW26_PFC1_M1_sc4	0
										GW26_PFC1_M1_sc5	GABAergic neurons	GW26_PFC1_M1_sc5	0
										GW26_PFC1_M1_sc6	GABAergic neurons	GW26_PFC1_M1_sc6	0
										GW26_PFC1_M1_sc7	Neurons	GW26_PFC1_M1_sc7	6.8
										GW26_PFC1_M1_sc8	OPC	GW26_PFC1_M1_sc8	0
										GW26_PFC1_M1_sc9	GABAergic neurons	GW26_PFC1_M1_sc9	0
										GW26_PFC1_M1_sc11	Neurons	GW26_PFC1_M1_sc11	7.05
										GW26_PFC1_M1_sc12	Neurons	GW26_PFC1_M1_sc12	0
										GW26_PFC1_M1_sc13	Neurons	GW26_PFC1_M1_sc13	0
										GW26_PFC1_M1_sc15	Neurons	GW26_PFC1_M1_sc15	0
										GW26_PFC1_M1_sc16	Neurons	GW26_PFC1_M1_sc16	339.98
										GW26_PFC1_M2_sc1	GABAergic neurons	GW26_PFC1_M2_sc1	208.52
										GW26_PFC1_M2_sc2	OPC	GW26_PFC1_M2_sc2	4.51
										GW26_PFC1_M2_sc3	GABAergic neurons	GW26_PFC1_M2_sc3	195.23
										GW26_PFC1_M2_sc4	GABAergic neurons	GW26_PFC1_M2_sc4	6.09
										GW26_PFC1_M2_sc5	GABAergic neurons	GW26_PFC1_M2_sc5	0
										GW26_PFC1_M2_sc6	GABAergic neurons	GW26_PFC1_M2_sc6	0
										GW26_PFC1_M2_sc8	GABAergic neurons	GW26_PFC1_M2_sc8	8.34
										GW26_PFC1_M2_sc9	GABAergic neurons	GW26_PFC1_M2_sc9	0
										GW26_PFC1_M2_sc10	GABAergic neurons	GW26_PFC1_M2_sc10	0
										GW26_PFC1_M2_sc11	OPC	GW26_PFC1_M2_sc11	13.63
										GW26_PFC1_M2_sc12	GABAergic neurons	GW26_PFC1_M2_sc12	0
										GW26_PFC1_M2_sc13	GABAergic neurons	GW26_PFC1_M2_sc13	0
										GW26_PFC1_M2_sc14	GABAergic neurons	GW26_PFC1_M2_sc14	0
										GW26_PFC1_M2_sc16	Neurons	GW26_PFC1_M2_sc16	314.07
										GW26_PFC1_Q2_sc1	Neurons	GW26_PFC1_Q2_sc1	19.59
										GW26_PFC1_Q2_sc2	Neurons	GW26_PFC1_Q2_sc2	0
										GW26_PFC1_Q2_sc3	Neurons	GW26_PFC1_Q2_sc3	236.43
										GW26_PFC1_Q2_sc5	GABAergic neurons	GW26_PFC1_Q2_sc5	5.87
										GW26_PFC1_Q2_sc6	GABAergic neurons	GW26_PFC1_Q2_sc6	0
										GW26_PFC1_Q2_sc7	GABAergic neurons	GW26_PFC1_Q2_sc7	8.27
										GW26_PFC1_Q2_sc8	Neurons	GW26_PFC1_Q2_sc8	4.42
										GW26_PFC1_Q2_sc9	Neurons	GW26_PFC1_Q2_sc9	294.61
										GW26_PFC1_Q2_sc10	GABAergic neurons	GW26_PFC1_Q2_sc10	0
										GW26_PFC1_Q2_sc11	OPC	GW26_PFC1_Q2_sc11	0
										GW26_PFC1_Q2_sc12	Neurons	GW26_PFC1_Q2_sc12	0
										GW26_PFC1_Q2_sc13	GABAergic neurons	GW26_PFC1_Q2_sc13	0
										GW26_PFC1_Q2_sc14	Neurons	GW26_PFC1_Q2_sc14	0
										GW26_PFC1_Q2_sc15	GABAergic neurons	GW26_PFC1_Q2_sc15	0
										GW26_PFC1_Q2_sc16	OPC	GW26_PFC1_Q2_sc16	0
										GW26_PFC1_I2_sc1	Astrocytes	GW26_PFC1_I2_sc1	7
										GW26_PFC1_I2_sc2	Astrocytes	GW26_PFC1_I2_sc2	143.12
										GW26_PFC1_I2_sc3	Astrocytes	GW26_PFC1_I2_sc3	73.15
										GW26_PFC1_I2_sc4	GABAergic neurons	GW26_PFC1_I2_sc4	1267.68
										GW26_PFC1_I2_sc5	GABAergic neurons	GW26_PFC1_I2_sc5	0
										GW26_PFC1_I2_sc6	Neurons	GW26_PFC1_I2_sc6	0
										GW26_PFC1_I2_sc7	GABAergic neurons	GW26_PFC1_I2_sc7	128.23
										GW26_PFC1_I2_sc8	GABAergic neurons	GW26_PFC1_I2_sc8	0
										GW26_PFC1_I2_sc10	GABAergic neurons	GW26_PFC1_I2_sc10	0
										GW26_PFC1_I2_sc12	GABAergic neurons	GW26_PFC1_I2_sc12	5.96
										GW26_PFC1_I2_sc13	GABAergic neurons	GW26_PFC1_I2_sc13	435.74
										GW26_PFC1_I2_sc14	Astrocytes	GW26_PFC1_I2_sc14	229.04
										GW26_PFC1_I2_sc15	GABAergic neurons	GW26_PFC1_I2_sc15	0
										GW26_PFC1_I2_sc16	GABAergic neurons	GW26_PFC1_I2_sc16	26
										GW26_PFC1_I2_sc17	Astrocytes	GW26_PFC1_I2_sc17	2.18
										GW26_PFC1_I2_sc18	GABAergic neurons	GW26_PFC1_I2_sc18	270.02
										GW26_PFC1_I2_sc19	Astrocytes	GW26_PFC1_I2_sc19	0
										GW26_PFC1_I2_sc20	GABAergic neurons	GW26_PFC1_I2_sc20	238.39
										GW26_PFC1_I2_sc21	Astrocytes	GW26_PFC1_I2_sc21	210.77
										GW26_PFC1_I2_sc24	GABAergic neurons	GW26_PFC1_I2_sc24	0
										GW26_PFC1_J3_sc1	Neurons	GW26_PFC1_J3_sc1	519.15
										GW26_PFC1_J3_sc2	Neurons	GW26_PFC1_J3_sc2	19.5
										GW26_PFC1_J3_sc3	GABAergic neurons	GW26_PFC1_J3_sc3	157.23
										GW26_PFC1_J3_sc4	GABAergic neurons	GW26_PFC1_J3_sc4	0
										GW26_PFC1_J3_sc5	Neurons	GW26_PFC1_J3_sc5	414.96
										GW26_PFC1_J3_sc6	GABAergic neurons	GW26_PFC1_J3_sc6	0
										GW26_PFC1_J3_sc7	GABAergic neurons	GW26_PFC1_J3_sc7	0
										GW26_PFC1_J3_sc8	GABAergic neurons	GW26_PFC1_J3_sc8	182.67
										GW26_PFC1_J3_sc9	GABAergic neurons	GW26_PFC1_J3_sc9	93.69
										GW26_PFC1_J3_sc10	GABAergic neurons	GW26_PFC1_J3_sc10	0
										GW26_PFC1_J3_sc11	Neurons	GW26_PFC1_J3_sc11	77.88
										GW26_PFC1_J3_sc12	GABAergic neurons	GW26_PFC1_J3_sc12	332.34
										GW26_PFC1_J3_sc13	OPC	GW26_PFC1_J3_sc13	0
										GW26_PFC1_J3_sc14	Neurons	GW26_PFC1_J3_sc14	0
										GW26_PFC1_J3_sc15	GABAergic neurons	GW26_PFC1_J3_sc15	0
										GW26_PFC1_J3_sc16	GABAergic neurons	GW26_PFC1_J3_sc16	24.6
										GW26_PFC1_K3_sc1	GABAergic neurons	GW26_PFC1_K3_sc1	38.61
										GW26_PFC1_K3_sc2	GABAergic neurons	GW26_PFC1_K3_sc2	225.54
										GW26_PFC1_K3_sc3	GABAergic neurons	GW26_PFC1_K3_sc3	139.71
										GW26_PFC1_K3_sc4	GABAergic neurons	GW26_PFC1_K3_sc4	46.9
										GW26_PFC1_K3_sc5	GABAergic neurons	GW26_PFC1_K3_sc5	442.59
										GW26_PFC1_K3_sc6	GABAergic neurons	GW26_PFC1_K3_sc6	369.75
										GW26_PFC1_K3_sc7	GABAergic neurons	GW26_PFC1_K3_sc7	0
										GW26_PFC1_K3_sc8	GABAergic neurons	GW26_PFC1_K3_sc8	6.27
										GW26_PFC1_K3_sc9	OPC	GW26_PFC1_K3_sc9	12.61
										GW26_PFC1_K3_sc10	OPC	GW26_PFC1_K3_sc10	269.1
										GW26_PFC1_K3_sc12	Astrocytes	GW26_PFC1_K3_sc12	0
										GW26_PFC1_K3_sc13	Neurons	GW26_PFC1_K3_sc13	386.92
										GW26_PFC1_K3_sc14	GABAergic neurons	GW26_PFC1_K3_sc14	0
										GW26_PFC1_K3_sc15	GABAergic neurons	GW26_PFC1_K3_sc15	97.3
										GW26_PFC1_K3_sc16	GABAergic neurons	GW26_PFC1_K3_sc16	0
										GW26_PFC1_O3_sc2	GABAergic neurons	GW26_PFC1_O3_sc2	0
										GW26_PFC1_O3_sc3	GABAergic neurons	GW26_PFC1_O3_sc3	30.85
										GW26_PFC1_O3_sc5	GABAergic neurons	GW26_PFC1_O3_sc5	1335.8
										GW26_PFC1_O3_sc7	GABAergic neurons	GW26_PFC1_O3_sc7	0
										GW26_PFC1_O3_sc8	Neurons	GW26_PFC1_O3_sc8	0
										GW26_PFC1_O3_sc9	GABAergic neurons	GW26_PFC1_O3_sc9	0
										GW26_PFC1_O3_sc10	GABAergic neurons	GW26_PFC1_O3_sc10	0
										GW26_PFC1_O3_sc11	GABAergic neurons	GW26_PFC1_O3_sc11	0
										GW26_PFC1_O3_sc12	Neurons	GW26_PFC1_O3_sc12	0
										GW26_PFC1_O3_sc13	GABAergic neurons	GW26_PFC1_O3_sc13	0
										GW26_PFC1_O3_sc14	GABAergic neurons	GW26_PFC1_O3_sc14	0
										GW26_PFC1_O3_sc15	GABAergic neurons	GW26_PFC1_O3_sc15	0
										GW26_PFC1_O3_sc16	GABAergic neurons	GW26_PFC1_O3_sc16	0
										GW26_PFC1_P4_sc1	Astrocytes	GW26_PFC1_P4_sc1	0
										GW26_PFC1_P4_sc2	GABAergic neurons	GW26_PFC1_P4_sc2	0
										GW26_PFC1_P4_sc3	GABAergic neurons	GW26_PFC1_P4_sc3	0
										GW26_PFC1_P4_sc4	GABAergic neurons	GW26_PFC1_P4_sc4	93.56
										GW26_PFC1_P4_sc5	Neurons	GW26_PFC1_P4_sc5	125
										GW26_PFC1_P4_sc7	GABAergic neurons	GW26_PFC1_P4_sc7	548.91
										GW26_PFC1_P4_sc8	GABAergic neurons	GW26_PFC1_P4_sc8	0
										GW26_PFC1_J1_sc1	Neurons	GW26_PFC1_J1_sc1	173.47
										GW26_PFC1_J1_sc4	OPC	GW26_PFC1_J1_sc4	0
										GW26_PFC1_J1_sc5	Neurons	GW26_PFC1_J1_sc5	11.08
										GW26_PFC1_J1_sc6	Neurons	GW26_PFC1_J1_sc6	0
										GW26_PFC1_J1_sc7	Neurons	GW26_PFC1_J1_sc7	123.49
										GW26_PFC1_J1_sc8	Astrocytes	GW26_PFC1_J1_sc8	6.02
										GW26_PFC1_J1_sc9	OPC	GW26_PFC1_J1_sc9	5.09
										GW26_PFC1_J1_sc10	GABAergic neurons	GW26_PFC1_J1_sc10	0
										GW26_PFC1_J1_sc12	GABAergic neurons	GW26_PFC1_J1_sc12	14.07
										GW26_PFC1_J1_sc13	Astrocytes	GW26_PFC1_J1_sc13	9.01
										GW26_PFC1_J1_sc14	GABAergic neurons	GW26_PFC1_J1_sc14	0
										GW26_PFC1_J1_sc15	OPC	GW26_PFC1_J1_sc15	19.22
										GW26_PFC1_J1_sc16	OPC	GW26_PFC1_J1_sc16	0
										GW26_PFC1_L2_sc1	GABAergic neurons	GW26_PFC1_L2_sc1	4.24
										GW26_PFC1_L2_sc2	GABAergic neurons	GW26_PFC1_L2_sc2	0
										GW26_PFC1_L2_sc3	Neurons	GW26_PFC1_L2_sc3	271.63
										GW26_PFC1_L2_sc4	GABAergic neurons	GW26_PFC1_L2_sc4	0
[truncated: 310 more rows]

## Sheet: Figure 1-figure supplement 1B
Figure 1-figure supplement 1B
FGF13 transcript levels in fetal human brain
	Experiment #	TV-1	TV-2	TV-3	TV-4	TV-5	TV-6
	1	1	1.538	0.00686154	2.70769	0.00369231	0.186
	2	1	1.65	0.00692857	3.15714	0.00521429	0.2
	3	1	1.551	0.0104918	2.92131		0.188
	4	1		0.00608824	2.38235		0.173

## Sheet: Figure 1-figure supplement 1C
Figure 1-figure supplement 1C
Cell marker expression (mRNA level) in iPSCs cultured from the ID patients
	Experiment #	Nanog	PAX6	Map2	GFAP	Nestin
	1	153.821	1	3.7895	0	3.51041
	2	196.362	1	5.91874	0	3.39972
	3	109.214	1	1.68548	0	1.35377
	4	20.9979	1	0.432682	0	0.973368
