# Supplementary material for: 5'-UTR SNP of FGF13 causes translational defect and intellectual disability
Source: eLife. 2021 Jun 29;10:e63021. doi: 10.7554/eLife.63021 (PMC8241442; doi:10.7554/eLife.63021)
Supplement: Figure 1—source data 1. [file elife-63021-fig1-data1.xlsx]

## Sheet: Figure 1D
Figure 1D
FGF13 protein level, normalize to HA-RFP
	Experiment #	Iso2-WT	Iso2-Mut	Iso4-WT	Iso4-Mut		Statistics summary
	1	1	0.519028	1	0.562605		Iso2-Mut vs Iso2-WT (Two-tailed paired t test)
	2	1	0.613046	1	0.590146		P value	0.0037
	3	1	0.383896	1	0.251739		P value summary	**
	4	1	0.627085	1	0.507919		Significantly different (P < 0.05)?	Yes
							Iso4-Mut vs Iso4-WT (Two-tailed paired t test)
							P value	0.0067
							P value summary	**
							Significantly different (P < 0.05)?	Yes

## Sheet: Figure 1E
Figure 1E
FGF13 mRNA level, normalize to HA-RFP
	Experiment #	Iso2-WT	Iso2-Mut	Iso4-WT	Iso4-Mut		Statistics summary
	1	1	1.27255	1	0.930216		Iso2-Mut vs Iso2-WT (Two-tailed paired t test)
	2	1	0.811252	1	0.698383		P value	0.5364
	3	1	0.716261	1	0.854375		P value summary	ns
	4	1	0.89027	1	1.17857		Significantly different (P < 0.05)?	No
	5	1	1.32957	1	1.23402		Iso4-Mut vs Iso4-WT (Two-tailed paired t test)
	6	1	1.50381	1	1.15213		P value	0.9306
							P value summary	ns
							Significantly different (P < 0.05)?	No

## Sheet: Figure 1F
Figure 1F
Luminescence ratio of Renilla / Firefly
	Experiment #	WT	Mut				Statistics summary
	1	1	0.576618				Mut vs WT (Two-tailed paired t test)
	2	1	0.519026				P value	0.0032
	3	1	0.724279				P value summary	**
	4	1	0.641622				Significantly different (P < 0.05)?	Yes

## Sheet: Figure 1H
Figure 1H
FGF13 protein level in WT and paitent iPSCs, normalize to actin
	Experiment #	FGF13-Iso2-WT	FGF13-Iso2-Patient	FGF13-Iso4-WT	FGF13-Iso4-Patient		Statistics summary
	1	1	0.801724	1	0.457531		Iso2-Patient vs Iso2-WT (Two-tailed paired t test)
	2	1	0.668132	1	0.617734		P value	0.0437
	3	1	0.560073	1	0.551087		P value summary	*
							Significantly different (P < 0.05)?	Yes
							Iso4-Patient vs Iso4-WT (Two-tailed paired t test)
							P value	0.0101
							P value summary	*
							Significantly different (P < 0.05)?	Yes

## Sheet: Figure 1I
Figure 1I
FGF13 mRNA level in WT and paitent iPSCs, normalize to GAPDH
	Experiment #	FGF13-Iso2-WT	FGF13-Iso2-Patient	FGF13-Iso4-WT	FGF13-Iso4-Patient		Statistics summary
	1	1	0.916767	1	0.856787		Iso2-Patient vs Iso2-WT (Two-tailed paired t test)
	2	1	1.22472	1	1.11518		P value	0.6136
	3	1	1.01941	1	0.994632		P value summary	ns
							Significantly different (P < 0.05)?	No
							Iso4-Patient vs Iso4-WT (Two-tailed paired t test)
							P value	0.8951
							P value summary	ns
							Significantly different (P < 0.05)?	No

## Sheet: Figure 1J
Figure 1J
FGF13 protein level in WT and Cas9-edited iPSCs, normalize to actin
	Experiment #	FGF13-Iso2-WT	FGF13-Iso2-Mut	FGF13-Iso4-WT	FGF13-Iso4-Mut		Statistics summary
	1	1	0.945328	1	0.755894		Iso2-Mut vs Iso2-WT (One-tailed paired t test)
	2	1	0.791981	1	0.299741		P value	0.0497
	3	1	0.7602	1	0.667195		P value summary	*
							Significantly different (P < 0.05)?	Yes
							Iso4-Mut vs Iso4-WT (One-tailed paired t test)
							P value	0.0464
							P value summary	*
							Significantly different (P < 0.05)?	Yes

## Sheet: Figure 1K
Figure 1K
FGF13 mRNA level in WT and Cas9-edited iPSCs, normalize to GAPDH
	Experiment #	FGF13-Iso2-WT	FGF13-Iso2-Mut	FGF13-Iso4-WT	FGF13-Iso4-Mut		Statistics summary
	1	1	0.981482	1	0.977357		Iso2-Mut vs Iso2-WT (Two-tailed paired t test)
	2	1	1.48692	1	0.742073		P value	0.8527
	3	1	0.680321	1	1.47801		P value summary	ns
							Significantly different (P < 0.05)?	No
							Iso4-Mut vs Iso4-WT (Two-tailed paired t test)
							P value	0.7903
							P value summary	ns
							Significantly different (P < 0.05)?	No

## Sheet: Figure 1L
Figure 1L
Induced neuron from WT and Mut iPSCs, ratio of polarized neurons, axon branching points and total axon length
		Ratio of polarized neurons (%)
	Experiment #	WT	Mut				Statistics summary
	1	76.087	71.1539				Mut vs WT (One-tailed Mann Whitney U test)
	2	80.4878	59.0909				P value	0.05
	3	78.7879	64.8649				P value summary	*
							Significantly different (P < 0.05)?	Yes
		Axon branching points
	Neuron #	WT	Mut				Statistics summary
	1	3	1				Mut vs WT (One-tailed Mann Whitney U test)
	2	3	1				P value	5.45376e-05
	3	2	1				P value summary	***
	4	2	2				Significantly different (P < 0.05)?	Yes
	5	3	3
	6	4	5
	7	1	3				Statistics summary		Data localize in line 151-281
	8	4	3				Mut vs WT (One-tailed Mann Whitney U test)
	9	2	1				P value	0.4409
	10	3	2				P value summary	ns
	11	1	3				Significantly different (P < 0.05)?	No
	12	2	1
	13	2	4
	14	1	4
	15	2	2
	16	3	3
	17	1	1
	18	1	4
	19	2	3
	20	3	1
	21	1	4
	22	3	3
	23	1	2
	24	1	1
	25	2	1
	26	1	1
	27	2	1
	28	1	1
	29	1	2
	30	1	6
	31	1	4
	32	1	4
	33	1	4
	34	1	3
	35	3	4
	36	1	1
	37	3	1
	38	3	1
	39	1	1
	40	1	1
	41	1	1
	42	2	2
	43	2	2
	44	1	3
	45	3	1
	46	2	1
	47	2	1
	48	2	3
	49	1	4
	50	1	3
	51	1	1
	52	2	1
	53	1	1
	54	1	1
	55	1	3
	56	1	1
	57	1	1
	58	1	1
	59	2	1
	60	2	4
	61	2	6
	62	3	4
	63	3	2
	64	2	2
	65	5	5
	66	4	3
	67	4	2
	68	3	2
	69	2	1
	70	4	1
	71	1	2
	72	1	1
	73	1	4
	74	1	3
	75	3	3
	76	3	4
	77	1	1
	78	1	1
	79	1	3
	80	6	3
	81	4	3
	82	1	1
	83	1	2
	84	1	3
	85	1	2
	86	1	4
	87	1	1
	88	2	1
	89	2	4
	90	1	4
	91	1	4
	92	1	1
	93	1	4
	94	1	3
	95	1	2
	96	1	6
	97	1	2
	98	1	2
	99	1	3
	100	2	3
	101	1	2
	102	3	1
	103	1	4
	104	1	3
	105	2	3
	106	1	1
	107	2	3
	108	1	4
	109	1	3
	110	1	3
	111	1	4
	112	1	1
	113	1	1
	114	3	4
	115	4	4
	116	1	1
	117	1	1
	118	1	1
	119	1	4
	120	3	6
	121		3
	122		3
	123		3
	124		1
	125		2
	126		1
	127		3
	128		2
	129		4
	130		2
	131		2
		Total axon length (um)
	Neuron #	WT	Mut
	1	420.17	383.93
	2	170.14	226.39
	3	479.18	415.07
	4	551.98	233.59
	5	649.75	244.75
	6	440.12	567.12
	7	1006.53	646.84
	8	517.79	394.91
	9	659.96	158.69
	10	645.16	294.3
	11	341.17	256.52
	12	270.94	189.07
	13	452.03	241.13
	14	349.15	346.95
	15	310.58	311.63
	16	406.67	365.75
	17	155.72	196.17
	18	241.75	218.67
	19	185.05	389.93
	20	219.99	57.72
	21	461.67	281.34
	22	244.22	758.49
	23	240.13	161.38
	24	365.88	320.09
	25	392.68	412.12
	26	359.03	124.67
	27	762.66	240.02
	28	268	212.89
	29	140.51	371.32
	30	124.42	660.44
	31	474.07	495.89
	32	382.9	398.67
	33	220.42	398.6
	34	242.39	960.81
	35	396.51	492.72
	36	294.19	250.93
	37	424.35	272.02
	38	201.18	108.91
	39	100.45	232.6
	40	248.67	272.17
	41	210.05	232.89
	42	243.27	356.9
	43	567.78	472.93
	44	215.66	368.15
	45	376.96	422.25
	46	467.29	269.11
	47	806.05	58.8
	48	1035.75	541.81
	49	1093.69	426.81
	50	309.72	559.05
	51	539.78	127.15
	52	627.45	163.89
	53	1188.86	154.38
	54	212.88	198.72
	55	286.42	331.02
	56	161.13	207.5
	57	202.99	131.85
	58	387.66	183.05
	59	970.77	227.04
	60	215.08	154.5
	61	359.59	349.42
	62	279.38	345.82
	63	193.73	171.38
	64	376.89	295
	65	186.64	205.51
	66	176.93	113.62
	67	237.16	210.49
	68	577.93	356.35
	69	177.68	184.27
	70	327.33	161.89
	71	495.08	196.71
	72	787.85	166.76
	73	476.99	204.98
	74	379.13	206.95
	75	820.6	296.71
	76	427.73	221.82
	77	249.37	96.1
	78	191.84	126.2
	79	75.79	443.48
	80	360.32	212.31
	81	700.79	215.85
	82	251.51	130.01
	83	211.02	164.73
	84	264.36	224.61
	85	346.58	211.52
	86	166.47	267.82
	87	134.64	127.7
	88	214.32	244.74
	89	130.12	163.11
	90	137.63	248.13
	91	113.16	155.06
	92	135.72	291.26
	93	106.94	474.91
	94	197.62	312.09
	95	217.66	301.96
	96	141.96	800.4
	97	98.49	621.94
	98	76.54	369.62
	99	78.15	313.34
	100	324.93	753.05
	101	397.04	497.68
	102	210.03	421.9
	103	206.51	518.59
	104	314.66	523.6
	105	337.71	750.68
	106	308.77	315.31
	107	655.89	908.39
	108	230.48	471.45
	109	120.84	476
	110	107	682.44
	111	106.39	510.19
	112	194.31	237.53
	113	245.94	455.21
	114	248.22	303.39
	115	273.59	461.53
	116	182.41	251.83
	117	189.12	349.62
	118	180.12	433.64
	119	217.58	295.1
	120	361.12	667.4
	121		351.35
	122		172.14
	123		317.74
	124		305.8
	125		200.87
	126		284.89
	127		297.63
	128		197.26
	129		473.08
	130		257.63
	131		186.59
