# Supplementary material for: 5'-UTR SNP of FGF13 causes translational defect and intellectual disability
Source: eLife. 2021 Jun 29;10:e63021. doi: 10.7554/eLife.63021 (PMC8241442; doi:10.7554/eLife.63021)
Supplement: Figure 2—figure supplement 1—source data 1. [file elife-63021-fig2-figsupp1-data1.xlsx]

## Sheet: Figure 2-figure supplement 1A
Figure 2-figure supplement 1A
FGF13 mRNA level, normalize to HA-RFP
	Experiment #	Iso2-WT	Iso2-Mut	Iso4-WT	Iso4-Mut		Statistics summary
	1	1	0.862452	1	1.27736		Iso2-Mut vs Iso2-WT (Two-tailed paired t test)
	2	1	1.09313	1	1.4632		P value	0.3489
	3	1	1.28753	1	0.921712		P value summary	ns
	4	1	0.897069	1	1.13352		Significantly different (P < 0.05)?	No
	5	1	1.48312	1	0.957714		Iso4-Mut vs Iso4-WT (Two-tailed paired t test)
							P value	0.2096
							P value summary	ns
							Significantly different (P < 0.05)?	No

## Sheet: Figure 2-figure supplement 1E
Figure 2-figure supplement 1E
FGF13 transcript levels in the mouse cerebral cortex and hippocampus
		Cortex				Hippocampus
	Experiment #	TV-1	TV-2	TV-3	TV-4	TV-1	TV-2	TV-3	TV-4
	1	1	0.544294	0.014931	4.72811	1	1.02391	0.060153	2.51029
	2	1	1.39903	0.030137	8.37375	1	0.847736	0.068907
	3	1	0.363167	0.004877		1	0.48558	0.051673	1.9935
	4	1	1.55635	0.03615		1	0.973331	0.11022	3.14092
	5					1	0.832263	0.065352	3.09682
	6					1	0.483349	0.125678	1.79327

## Sheet: Figure 2-figure supplement 1F
Figure 2-figure supplement 1F
FGF13 mRNA level in P0 WT and Mut mice, cortex and hippocampus, normalize to GAPDH
	Experiment #	WT-Iso2-C	Mut-Iso2-C	WT-Iso4-C	Mut-Iso4-C	WT-Iso2-H	Mut-Iso2-H	WT-Iso4-H	Mut-Iso4-H		Statistics summary
	1	1	0.713678	1	0.753611	1	1.0697	1	1.61423		Mut-Iso2-C vs WT-Iso2-C (Two-tailed paired t test)
	2	1	0.525647	1	1.46116	1	1.02962	1	0.622147		P value	0.5115
	3	1	1.04881	1	0.90823	1	0.994292	1	0.936207		P value summary	ns
	4	1	1.08922	1	0.462173	1	1.15525	1	1.04492		Significantly different (P < 0.05)?	No
	5	1	0.601959	1	0.631044	1	0.813071	1	1.4302		Mut-Iso4-C vs WT-Iso4-C (Two-tailed paired t test)
	6	1	0.549323	1	1.21014						P value	0.581
	7	1	1.51404	1	1.479						P value summary	ns
	8	1	1.01254	1	0.809485						Significantly different (P < 0.05)?	No
	9	1	1.12178	1	2.0431						Mut-Iso2-H vs WT-Iso2-H (Two-tailed paired t test)
	10	1	1.12941	1	1.10425						P value	0.8375
											P value summary	ns
											Significantly different (P < 0.05)?	No
											Mut-Iso4-H vs WT-Iso4-H (Two-tailed paired t test)
	PS: -C represents cortex, -H represents hippocampus										P value	0.505
											P value summary	ns
											Significantly different (P < 0.05)?	No

## Sheet: Figure 2-figure supplement 1G
Figure 2-figure supplement 1G
Light-dark box test
		Time in light box (s)
	Mouse #	WT	Mut				Statistics summary
	1	480.2	570				Mut vs WT (Two-tailed unpaired t test with Welch's correction, passed D'Agostino & Pearson normality test)
	2	553.2	100.4				P value	0.6494
	3	408.6	312.4				P value summary	ns
	4	187.6	575				Significantly different (P < 0.05)?	No
	5	430.8	292
	6	350.2	279.2
	7	403.4	465.4
	8	338.4	464
	9	177.4	176.2
	10	520	325.6
	11		333
	12		399.8
	13		386
	14		364.6
		Entries in light box
	Mouse #	WT	Mut				Statistics summary
	1	26	13				Mut vs WT (Two-tailed unpaired t test with Welch's correction, passed D'Agostino & Pearson normality test)
	2	23	16				P value	0.7739
	3	25	46				P value summary	ns
	4	18	13				Significantly different (P < 0.05)?	No
	5	38	35
	6	17	23
	7	49	32
	8	30	23
	9	19	23
	10	32	43
	11		24
	12		16
	13		21
	14		42
		Latency of first entry (s)
	Mouse #	WT	Mut				Statistics summary
	1	3	11				Mut vs WT (Two-tailed unpaired t test with Welch's correction, passed D'Agostino & Pearson normality test)
	2	20	22				P value	0.1178
	3	10	10				P value summary	ns
	4	20	12				Significantly different (P < 0.05)?	No
	5	31	26
	6	24	21
	7	22	10
	8	26	4
	9	11	3
	10	11	15
	11		5
	12		4
	13		15
	14		14

## Sheet: Figure 2-figure supplement 1H
Figure 2-figure supplement 1H
Novel object recognition test (5 min exploration)
		Time with new object (s)
	Mouse #	WT	Mut				Statistics summary
	1	35.2	26.2				Mut vs WT (Two-tailed unpaired t test with Welch's correction, passed D'Agostino & Pearson normality test)
	2	62.4	51.6				P value	0.6208
	3	31.6	67				P value summary	ns
	4	31.8	6				Significantly different (P < 0.05)?	No
	5	64.4	68.8
	6	25.4	41
	7	81.6	113
	8	18.6	41
	9	102.6	50.8
	10	0.2	76.4
	11		51.6
	12		20.2
	13		44.4
	14		63.2

## Sheet: Figure 2-figure supplement 1I
Figure 2-figure supplement 1I
Open field, locomotion
Time bin = 2.5 min		Immobility time in each minute (s)
		WT mouse #										Mut mouse #
	Time (min)	1	2	3	4	5	6	7	8	9	10	1	2	3	4	5	6	7	8	9	10	11	12	13	14
		1309.21	801.75	1034.11	1088.71	1034.61	1276.32	1485.78	1204.94	992.27	1653.49	1754.26	1594.06	1598.06	1092.2	1456.61	1034.9	1208.16	950.45	896.99	1250.46	1295.46	1173.56	1155.7	1464.59
	5	904.45	715.72	1292.12	1174.81	886.74	1115.58	1589.71	1174.86	1017.07	1558.05	1160.86	1100.03	1076.26	817.46	1169.15	1156.46	1190.58	1051.01	1054.14	965.98	1152.65	1043.37	699.03	1254.63
		1082.05	1021.53	943.19	1239.79	996.53	1179.96	1340.5	1047.09	1124.52	1088.61	917.88	656.8	911.86	1195.39	1051.65	957.66	1082.71	1029.77	947.69	890.8	1306.56	1212.51	827.53	1203.98
	10	997.35	852.35	799.71	961.09	946.1	1217.67	1087.21	1076.78	1192.71	1203.02	1055.14	944.39	1039.89	771.27	807.34	825.94	1163.24	777.66	813.78	762.17	828.97	1130.49	703.67	1218.45
		800.66	1011.61	972.1	923.62	973.97	933.53	732.9	1127.88	1182.49	1062.42	1198.92	748.29	1054.37	983.67	1116.61	823.91	1205.62	722.16	761.97	718.08	1078.69	1070.96	928.94	961.07
	15	961.19	857.23	819.75	945.2	914.31	1154.49	1192.47	823.73	1116.97	1222.6	977.27	677.25	728.42	859.54	744.35	787.11	1321.21	935.89	1032.16	972.61	953.48	980.72	635.96	996.78
		640.31	1004.05	583.95	876.9	781.37	884.98	1058.99	947.11	1047.47	1057.94	876.32	680.26	584.82	924.39	904.13	654.99	1050.94	903.52	864.25	673.72	961.6	870.04	818.09	975.53
	20	775.25	987.58	579.46	879.09	928.68	774.93	782.52	871.18	1073.67	647.39	882.86	692.62	716.67	866.97	1150.15	899.12	915.81	689.12	823.47	882.31	937.44	957.49	665.06	860.08
		858.76	1002.2	874.81	853.05	744.22	972.14	524.24	909.55	1248.51	1096.13	769.87	797.76	663.79	774.24	625.64	673.9	993.71	873.23	904.87	696.28	1200.84	995.11	680.58	1023.51
	25	532.93	588.64	1066.73	965.5	730.33	873.12	414.19	848.7	845.24	1008.77	1217.19	674.41	850.46	895.79	923.63	794.31	737.46	784.25	717.79	813.6	796.4	833.02	907.02	1083.03
		810.97	1062.35	289.81	630.34	720.59	788.34	970.33	906.38	802.07	1366.98	884.38	596.22	1031.74	579.23	919.44	690.54	1018.41	919.27	934.69	732.56	1253.82	1046.96	631.42	726.61
	30	657.53	1080.78	468.42	728.38	698.18	855.73	739.46	663.48	1060.93	792.08	964.29	668.73	1037.81	945.58	849.6	677.94	651.22	1023.19	705.33	629.69	1033.97	1023.4	649.8	857.46
	Statistics summary
	Mut vs WT (Two-way ANOVA)
	Source of Variation	P value	P value summary		Significantly different (P < 0.05)?
	Interaction	0.5176	ns		No
	time	<0.0001	***		Yes
	genotype	0.3273	ns		No
			Distance in center zone (cm)_now shown in figure
		Mouse #	WT	Mut
		1	138.6	209.8					Statistics summary
		2	187.8	168.6					Mut vs WT (Two-tailed unpaired t test with Welch's correction, passed D'Agostino & Pearson normality test)
		3	497.8	330.2					P value					0.8314
		4	236.4	309.6					P value summary					ns
		5	386	218.2					Significantly different (P < 0.05)?					No
		6	128.2	212.4
		7	145.6	344
		8	212.6	394.4
		9	142.2	229.4
		10	294.8	134
		11		200.8
		12		266
		13		136.8
		14		298
