# Supplementary material for: 5'-UTR SNP of FGF13 causes translational defect and intellectual disability
Source: eLife. 2021 Jun 29;10:e63021. doi: 10.7554/eLife.63021 (PMC8241442; doi:10.7554/eLife.63021)
Supplement: Figure 2—source data 1. [file elife-63021-fig2-data1.xlsx]

## Sheet: Figure 2B
Figure 2B
FGF13 protein level, normalize to HA-RFP
	Experiment #	Iso2-WT	Iso2-Mut	Iso4-WT	Iso4-Mut		Statistics summary
	1	1	0.405746	1	0.647341		Iso2-Mut vs Iso2-WT (Two-tailed paired t test)
	2	1	0.827324	1	0.447239		P value	0.0263
	3	1	0.659813	1	0.573794		P value summary	*
	4	1	0.399063	1	0.384514		Significantly different (P < 0.05)?	Yes
							Iso4-Mut vs Iso4-WT (Two-tailed paired t test)
							P value	0.0038
							P value summary	**
							Significantly different (P < 0.05)?	Yes

## Sheet: Figure 2C
Figure 2C
Luminescence ratio of Renilla / Firefly
	Experiment #	WT	Mut				Statistics summary
	1	1	0.881961				Mut vs WT (Two-tailed paired t test)
	2	1	0.804325				P value	0.0013
	3	1	0.813233				P value summary	**
	4	1	0.677012				Significantly different (P < 0.05)?	Yes
	5	1	0.665511
	6	1	0.803811

## Sheet: Figure 2D
Figure 2D
FGF13 protein level in P0 WT and Mut mice, cortex and hippocampus, normalize to actin
	Experiment #	WT-Iso2-C	Mut-Iso2-C	WT-Iso4-C	Mut-Iso4-C	WT-Iso2-H	Mut-Iso2-H	WT-Iso4-H	Mut-Iso4-H		Statistics summary
	1	1	0.687413	1	0.763557	1	0.952428	1	0.596408		Mut-Iso2-C vs WT-Iso2-C (Two-tailed paired t test)
	2	1	0.744926	1	0.868233	1	0.839935	1	0.774533		P value	0.0017
	3	1	0.773817	1	0.803888	1	1.01791	1	0.852327		P value summary	**
	4	1	0.794486	1	0.811158	1	0.816986	1	0.630993		Significantly different (P < 0.05)?	Yes
	5	1	0.869765	1	0.960965	1	0.775019	1	0.755366		Mut-Iso4-C vs WT-Iso4-C (Two-tailed paired t test)
											P value	0.0098
	PS: -C represents cortex, -H represents hippocampus										P value summary	**
											Significantly different (P < 0.05)?	Yes
											Mut-Iso2-H vs WT-Iso2-H (One-tailed paired t test)
											P value	0.0286
											P value summary	*
											Significantly different (P < 0.05)?	Yes
											Mut-Iso4-H vs WT-Iso4-H (One-tailed paired t test)
											P value	0.0021
											P value summary	**
											Significantly different (P < 0.05)?	Yes

## Sheet: Figure 2E
Figure 2E
Morris water maze,hidden platform, escape latency and time spent in the quadrant with the platform
		Escape latency (s)
		WT mouse #							Mut mouse #
	Day #	1	2	3	4	5	6	7	1	2	3	4	5	6	7	8	9	10	11	12
	1	44.1	42.713	20.1875	45.662	18.4997	50.1	52.7248	30.0753	43.8875	40.4625	37.613	39.3	59.8867	39.9245	22.5252	38.4	29.8128	14.4878	35.7245
	2	25.3253	50.7253	29.6122	47.1508	12.3752	24.0753	25.2255	44.0505	32.225	50.7503	36.3245	29.9375	53.25	32.8377	37.301	50.3505	30.2127	27.3875	15.6375
	3	36.8252	31.0245	41.3993	18.5628	17.6502	31.6875	25.6005	29.3128	39.4498	32.9502	7.81225	35.4378	25.687	13.6	32.8125	30.7117	46.7995	36.3	33.975
	4	17.0368	11.5617	15.7875	8.69975	14.3995	13.8242	9.06225	30.7875	15.4745	28.9125	9.337	29.1245	25.0493	45.4997	15.2622	22.724	12.6497	20.962	10.4992
	5	8.8115	12.724	12.9243	10.8245	8.83675	15.662	15.4492	49.9368	24.4875	11.8615	10.0615	9.99925	34.6115	7.14925	11.1743	22.3992	18.6375	10.5245	13.0117
	6	14.5128	12.5625	6.4375	7.53725	15.9627	19.2	9.61275	24.0377	27.3745	8.2375	7.4	13.712	40.5998	10.1	28.8	13.5245	37.7993	7.35	8.98725
	Statistics summary
	Mut vs WT (Two-way ANOVA)
	Source of Variation	P value	P value summary		Significantly different (P < 0.05)?
	Interaction	0.5596	ns		No
	day	<0.0001	***		Yes
	genotype	0.0332	*		Yes
		% time spent in the quadrant with the platform
		WT mouse #							Mut mouse #
	Day #	1	2	3	4	5	6	7	1	2	3	4	5	6	7	8	9	10	11	12
	1	28.3313	18.9563	31.5053	18.828	28.6642	21.0115	22.301	25.8712	17.2563	20.6788	24.879	27.2042	19.0257	22.8893	35.0842	20.249	35.9027	34.0802	32.699
	2	46.8985	25.4052	36.1175	36.055	51.8045	48.1695	44.8965	18.0993	23.2218	14.6308	37.8342	41.2948	19.56	26.9703	21.7052	14.6453	27.7817	41.2845	40.7692
	3	40.264	45.7655	27.5297	46.362	44.4378	32.083	45.29	24.556	19.4165	32.5303	62.4327	28.5195	44.568	37.3425	32.977	23.8927	38.4642	37.4273	35.6065
	4	55.5998	75.2805	59.4967	61.6808	72.1873	56.104	59.4685	26.8848	39.9153	49.4267	62.858	30.2165	49.242	22.64	40.584	37.619	49.9233	37.4487	68.0127
	5	76.2782	47.8055	52.064	55.574	63.0838	62.8465	51.482	19.844	35.3755	60.9663	68.54	49.3525	29.1375	49.274	53.7193	53.458	51.9832	52.1562	48.6572
	6	48.0767	55.8468	68.342	58.7593	66.4412	60.9498	46.7552	31.7737	33.8713	51.733	69.619	52.5185	32.6857	50.1422	38.6085	64.8208	41.1292	57.9805	64.5383
	Statistics summary
	Mut vs WT (Two-way ANOVA)
	Source of Variation	P value	P value summary		Significantly different (P < 0.05)?
	Interaction	0.0581	ns		No
	day	2e-15	***		Yes
	genotype	1.23316e-05	***		Yes

## Sheet: Figure 2F
Figure 2F
Morris water maze,probe test day, the time spend in the quandrant with platform, the times crossing the platform position and average swimming speed
		% time spent in the quadrant with the platform
	Mouse #	WT	Mut				Statistics summary
	1	41.722	41.447				Mut vs WT (Two-tailed unpaired t test with Welch's correction, passed D'Agostino & Pearson normality test)
	2	70.199	12.583				P value	0.0301
	3	50	42.384				P value summary	*
	4	50.993	43.709				Significantly different (P < 0.05)?	Yes
	5	77.483	34.437
	6	53.642	33.775
	7	40.397	29.801
	8		62.914
	9		26.316
	10		38.411
	11		57.237
	12		43.709
		Platform crossing times
	Mouse #	WT	Mut				Statistics summary
	1	1	2				Mut vs WT (Two-tailed Mann Whitney U test)
	2	3	0				P value	0.2748
	3	2	2				P value summary	ns
	4	2	0				Significantly different (P < 0.05)?	No
	5	7	0
	6	1	1
	7	1	3
	8		2
	9		0
	10		1
	11		2
	12		2
		Swimming speed (cm/s)
	Mouse #	WT	Mut				Statistics summary
	1	12.4213	17.9007				Mut vs WT (Two-tailed unpaired t test with Welch's correction, passed D'Agostino & Pearson normality test)
	2	14.1205	20.909				P value	0.0161
	3	15.6855	15.816				P value summary	*
	4	14.456	15.7485				Significantly different (P < 0.05)?	Yes
	5	17.941	15.256
	6	17.2682	22.476
	7	15.1845	18.9445
	8		18.781
	9		19.9655
	10		19.3465
	11		19.1965
	12		13.0832

## Sheet: Figure 2G
Figure 2G
Fear conditioning, contextual or cued memory tests
		Contextual test
		Freezing (% time)
	Mouse #	WT	Mut				Statistics summary
	1	45.2	20.2				Mut vs WT (Two-tailed unpaired t test with Welch's correction, passed D'Agostino & Pearson normality test)
	2	9.79	32.74				P value	0.0227
	3	55.07	33.45				P value summary	*
	4	54.36	30.34				Significantly different (P < 0.05)?	Yes
	5	30.16	18.77
	6	32.03	22.51
	7	38.61	11.3
	8	36.48	14.95
	9	19.57	17.53
	10	29.89	17.97
	11		22.86
	12		16.1
	13		37.46
	14		14.86
		Cued test
		Freezing (% time)
	Mouse #	WT	Mut				Statistics summary
	1	66.67	65.78				Mut vs WT (Two-tailed unpaired t test with Welch's correction, passed D'Agostino & Pearson normality test)
	2	65.78	75.22				P value	0.0405
	3	80.39	66.13				P value summary	*
	4	64.88	46.35				Significantly different (P < 0.05)?	Yes
	5	58.29	40.29
	6	67.74	55.44
	7	39.39	46.17
	8	81.82	25.85
	9	60.07	47.77
	10	70.23	72.37
	11		71.66
	12		47.42
	13		49.02
	14		43.14

## Sheet: Figure 2H
Figure 2H
Tail suspension test, time of immobility
		Immobility time in each minute (s)
		WT mouse #										Mut mouse #
	Time (min)	1	2	3	4	5	6	7	8	9	10	1	2	3	4	5	6	7	8	9	10	11	12	13	14
	1	6	3	5	0	6	0	11	11	5	1	3	1	4	0	11	1	1	0	0	3	0	0	0	4
	2	31	11	45	1	29	13	53	43	48	21	36	19	31	1	25	24	10	4	0	0	0	6	0	11
	3	45	19	38	11	34	38	51	36	31	40	48	29	36	0	53	46	49	6	0	0	10	6	3	23
	4	48	34	49	25	46	34	56	30	30	13	4	13	14	0	50	33	28	4	0	3	6	1	0	18
	5	50	18	58	45	21	8	45	43	40	0	0	21	6	0	54	14	1	10	4	26	14	4	0	19
	6	33	48	48	43	15	5	35	39	25	0	11	1	19	0	44	0	4	5	0	4	0	8	0	0
	Statistics summary
	Mut vs WT (Two-way ANOVA)
	Source of Variation	P value	P value summary		Significantly different (P < 0.05)?
	Interaction	0.1262	ns		No
	time	6.76044e-07	***		Yes
	genotype	3.356e-10	***		Yes
		Total immobility time (s)
	Mouse #	WT	Mut				Statistics summary
	1	213	102				Mut vs WT (Two-tailed Mann Whitney U test)
	2	133	84				P value					0.0009
	3	243	110				P value summary					***
	4	125	1				Significantly different (P < 0.05)?					Yes
	5	151	237
	6	98	118
	7	251	93
	8	202	29
	9	179	4
	10	75	36
	11		30
	12		25
	13		3
	14		75

## Sheet: Figure 2I
Figure 2I
Rotarod test
		Latency to fall (s)
	Mouse #	WT	Mut				Statistics summary
	1	290.333	252				Mut vs WT (Two-tailed Mann Whitney U test)
	2	269.333	290.333				P value					0.8076
	3	294.333	185				P value summary					ns
	4	213.667	216.333				Significantly different (P < 0.05)?					No
	5	256.333	208.333
	6	128.667	264.333
	7	231.667	300
	8	300	206
	9	225	273
	10	238.333	285.333
	11		195
	12		181
	13		288.333
	14		300

## Sheet: Figure 2J
Figure 2J
Three chamber test, object vs another mouse
		Time in different chamber (s)
		WT mouse #										Mut mouse #
Chamber name:		1	2	3	4	5	6	7	8	9	10	1	2	3	4	5	6	7	8	9	10	11	12	13	14
Social partner		212.6	416	155	285.4	227	344.2	300.8	268.2	325.6	195.8	208.2	251.2	166.4	319.2	168	245.2	230.4	144.4	273.2	137	258.8	301.4	252.8	206.4
Center		214.8	107.4	204.4	195.2	223.6	149	185.6	248.6	174.6	158.2	237.8	287.6	283.4	168.4	273.8	272.8	233.2	330	213.8	248.6	179	167	282.4	245
Inanimate object		172.6	76.6	240.6	119.4	149.4	106.8	113.6	83.2	99.8	246	154	61.2	150.2	112.4	158.2	82	136.4	125.6	113	214.4	162.2	131.6	64.8	148.6
		Statistics summary
		Mut vs WT (Two-way ANOVA)
		Source of Variation	P value	P value summary		Significantly different (P < 0.05)?
		Interaction	0.0057	**		Yes
		chamber	<0.0001	***		Yes
		genotype	>0.9999	ns		No
