# Supplementary material for: 5'-UTR SNP of FGF13 causes translational defect and intellectual disability
Source: eLife. 2021 Jun 29;10:e63021. doi: 10.7554/eLife.63021 (PMC8241442; doi:10.7554/eLife.63021)
Supplement: Figure 3—figure supplement 1—source data 1. [file elife-63021-fig3-figsupp1-data1.xlsx]

## Sheet: Figure 3-figure supplement 1B
Figure 3-figure supplement 1B
IUE, % neurons in each zone
E14.5 to P14		Layer II-IV
	Brain slice #	Fgf13WT	Fgf13Mut					Statistics summary
	1	93.3884	97.7273					Fgf13Mut vs Fgf13WT (Two-tailed Mann Whitney U test)
	2	100	99.1379					P value					>0.9999
	3	100	96					P value summary					ns
	4	95.3125	98.1308					Significantly different (P < 0.05)?					No
		Layer V-VI
	Brain slice #	Fgf13WT	Fgf13Mut					Statistics summary
	1	4.13223	1.13636					Fgf13Mut vs Fgf13WT (Two-tailed Mann Whitney U test)
	2	0	0.862069					P value					>0.9999
	3	0	2					P value summary					ns
	4	3.125	1.86916					Significantly different (P < 0.05)?					No
		WM
	Brain slice #	Fgf13WT	Fgf13Mut					Statistics summary
	1	2.47934	1.13636					Fgf13Mut vs Fgf13WT (Two-tailed Mann Whitney U test)
	2	0	0					P value					0.8286
	3	0	2					P value summary					ns
	4	1.5625	0					Significantly different (P < 0.05)?					No

## Sheet: Figure 3-figure supplement 1D
Figure 3-figure supplement 1D
Cux1-positive neuron distribution in cortex
P0		Layer II-IV										P7		Layer II-IV
	Brain slice #	Fgf13WT	Fgf13Mut		Statistics summary								Brain slice #	Fgf13WT	Fgf13Mut		Statistics summary
	1	55.9671	45.6332		Fgf13Mut vs Fgf13WT (Two-tailed Mann Whitney U test)								1	98.8691	97.8632		Fgf13Mut vs Fgf13WT (Two-tailed Mann Whitney U test)
	2	59.335	45.2541		P value					0.0043			2	97.6744	98.8287		P value					0.8857
	3	59.0551	46.4552		P value summary					**			3	96.7213	95.4459		P value summary					ns
	4	54.3307	47.7858		Significantly different (P < 0.05)?					Yes			4	97.8541	97.9508		Significantly different (P < 0.05)?					No
	5	49.1861	48.4211
	6		42.0949
		Layer V-VI												Layer V-VI
	Brain slice #	Fgf13WT	Fgf13Mut		Statistics summary								Brain slice #	Fgf13WT	Fgf13Mut		Statistics summary
	1	24.3827	30.786		Fgf13Mut vs Fgf13WT (Two-tailed Mann Whitney U test)								1	1.13086	2.13675		Fgf13Mut vs Fgf13WT (Two-tailed Mann Whitney U test)
	2	23.1458	30.5848		P value					0.0043			2	2.15947	1.1713		P value					0.8857
	3	21.2598	28.7313		P value summary					**			3	3.14208	4.55408		P value summary					ns
	4	24.5219	28.0124		Significantly different (P < 0.05)?					Yes			4	2.14592	1.84426		Significantly different (P < 0.05)?					No
	5	22.6744	31.3684
	6		35.8696
		Layer WM												Layer WM
	Brain slice #	Fgf13WT	Fgf13Mut		Statistics summary								Brain slice #	Fgf13WT	Fgf13Mut		Statistics summary
	1	19.6502	23.5808		Fgf13Mut vs Fgf13WT (Two-tailed Mann Whitney U test)								1	0	0		Fgf13Mut vs Fgf13WT (Two-tailed Mann Whitney U test)
	2	17.5192	24.1611		P value					0.1775			2	0.166113	0		P value					>0.9999
	3	19.685	24.8134		P value summary					ns			3	0.136612	0		P value summary					ns
	4	21.1474	24.2019		Significantly different (P < 0.05)?					No			4	0	0.204918		Significantly different (P < 0.05)?					No
	5	28.1395	20.2105
	6		22.0356

## Sheet: Figure 3-figure supplement 1F
Figure 3-figure supplement 1F
IUE, E14.5 to P14, distribution of axon projection
Ipsilateral branching																	Contralateral branching (S1)
		Signal intensity (% to ipsilateral layer V)							Statistics summary										Signal intensity (% to ipsilateral layer V)							Statistics summary
		WT brain slice #			Mut brain slice #				Mut vs WT (Two-way ANOVA)										WT brain slice #			Mut brain slice #				Mut vs WT (Two-way ANOVA)
Relative position to Layer I (%)		1	2	3	1	2	3		Source of Variation	P value	P value summary		Significantly different (P < 0.05)?				Relative position to Layer I (%)		1	2	3	1	2	3		Source of Variation	P value	P value summary		Significantly different (P < 0.05)?
	1	215.892	130.95	100.054	137.404	123.842	106.426		Interaction	0.9997	ns		No					1	15.8954	9.78696	7.05952	11.0353	6.67833	12.4487		Interaction	0.945	ns		No
	2	216.99	129.439	104.595	141.269	123.842	106.712		Position	<0.0001	***		Yes					2	16.2808	9.63496	10.7882	11.5772	10.5618	18.4475		Position	2.93343e-07	***		Yes
	3	220.247	130.61	102.8	143.541	123.842	112.203		genotype	0.2406	ns		No					3	13.9288	14.9613	9.44209	11.804	11.8414	21.6044		genotype	<1.00E-15	***		Yes
	4	212.054	131.174	104.728	145.549	123.842	113.905											4	14.3098	13.7393	11.2375	11.7106	7.67587	42.3925
	5	195.765	129.13	103.295	145.569	123.842	113.905											5	18.4262	19.8439	11.8868	21.1813	14.6824	39.6311
	6	193.636	131.118	104.78	142.935	123.842	113.905											6	13.3355	20.3514	12.6586	12.4383	23.2923	29.8694
	7	204.075	131.175	104.78	145.569	123.842	113.905											7	16.5134	28.7637	8.10284	20.2205	13.3759	39.1899
	8	197.174	130.893	104.78	145.569	123.842	113.905											8	13.0118	21.4217	12.194	23.2974	14.9535	49.0165
	9	169.915	131.116	104.78	145.569	123.842	113.905											9	11.7406	41.4586	14.2796	19.4432	18.4349	45.7798
	10	183.137	131.138	104.78	145.555	123.842	113.905											10	14.7957	37.7092	10.0854	24.4884	19.0014	56.92
	11	170.949	130.929	104.78	140.064	123.842	113.905											11	15.5067	25.7159	20.1758	21.2938	35.8403	44.2232
	12	154.307	131.175	104.78	145.569	123.842	113.905											12	27.8808	31.2314	23.8074	22.5045	18.3008	28.7895
	13	151.816	131.175	104.78	142.98	123.842	113.905											13	12.5181	24.469	12.0362	24.5344	34.7669	44.2025
	14	155.671	131.109	104.78	145.313	123.842	113.905											14	12.7029	28.2403	13.0045	46.9248	30.3772	44.4536
	15	133.716	127.4	104.78	145.562	123.842	113.905											15	12.1625	28.9985	19.4506	41.5883	23.5137	50.2028
	16	107.861	127.722	104.78	140.53	123.842	113.905											16	20.9119	23.5588	10.6503	24.9188	26.2212	47.8124
	17	135.439	130.526	104.78	141.127	123.842	113.905											17	13.8562	30.6603	12.7456	24.7954	33.6564	37.1243
	18	90.9799	128.095	104.78	141.896	121.996	113.905											18	13.7679	30.6874	19.1095	19.0494	22.8162	28.0295
	19	82.9406	121.104	104.78	134.743	123.842	113.905											19	13.8597	30.0103	12.8391	22.8739	37.048	38.8034
	20	76.7198	122.17	104.78	138.504	123.67	113.905											20	12.5367	32.4618	15.5134	15.5603	30.6873	31.9419
	21	81.8346	130.42	104.78	136.343	120.668	113.905											21	11.9599	27.9252	11.0544	19.81	23.2725	37.1731
	22	57.85	130.537	104.78	119.037	123.833	112.491											22	12.633	23.4758	17.5376	21.5692	25.8449	41.701
	23	43.4036	125.43	104.78	124.75	114.866	113.905											23	13.1584	25.3172	20.5472	29.5268	24.0268	36.1796
	24	46.1586	127.792	104.78	68.2725	113.073	113.241											24	12.2376	30.902	22.4976	23.7207	26.9288	27.4241
	25	53.4968	127.847	104.78	92.9811	85.6543	111.069											25	11.22	24.275	16.125	18.9291	32.9079	35.3097
	26	43.8399	121.415	104.78	81.8547	110.682	113.689											26	11.7963	24.5422	9.84905	12.0912	30.5272	39.0329
	27	51.4055	116.976	104.78	66.4308	106.194	113.905											27	12.9608	28.5107	6.72523	10.0899	21.0344	40.2654
	28	60.4404	114.911	104.78	65.2383	90.2835	109.62											28	13.7916	21.6675	12.9845	13.6732	14.8344	38.186
	29	67.4656	90.0794	104.78	87.1262	80.6064	100.672											29	21.6736	21.7167	8.54689	15.5762	15.6368	29.8815
	30	53.7151	97.4455	104.321	77.5658	79.2008	96.4012											30	12.2809	25.197	7.88398	13.5135	14.873	19.1578
	31	58.4963	97.7276	102.304	62.5011	78.6383	110.197											31	12.3776	25.0677	13.5231	10.8901	12.0176	15.5009
	32	68.6945	87.8077	103.41	57.2269	62.2334	106.604											32	11.602	20.1815	12.4146	23.2595	18.1381	14.6166
	33	71.441	89.6745	100.236	64.5194	73.4324	108.645											33	17.7341	18.1484	4.76269	20.7969	19.9671	17.7081
Ipsilateral layer V region	34	69.8939	84.5853	98.8969	61.4297	78.16	112.78		Statistics summary									34	10.5427	24.8639	7.06389	17.2651	9.02008	11.0905
	35	99.776	88.3772	100.849	75.3088	90.4384	99.8908		Layer V region, Mut vs WT (Two-way ANOVA)									35	11.4708	20.2094	5.31667	13.1615	8.85699	12.7685
	36	95.1738	89.8913	101.973	81.7385	78.0091	86.592		Source of Variation	P value	P value summary		Significantly different (P < 0.05)?					36	12.4413	14.4563	9.69642	18.113	11.2985	13.0971
	37	102.962	81.9353	100.175	97.0509	87.9185	82.5663		Interaction	0.7842	ns		No					37	17.2411	14.633	6.00509	15.8153	10.9993	13.1373
	38	107.552	82.8703	92.1972	103.729	78.8478	75.3483		Position	0.0816	ns		No					38	13.8594	13.9496	11.6458	20.5145	16.4688	14.1772
	39	96.3712	84.3512	73.9042	109.233	79.51	74.7716		genotype	0.0548	ns		No					39	22.3352	14.7689	8.11075	19.893	21.955	13.7735
	40	135.717	90.3445	80.4972	104.397	74.4867	72.5286											40	20.1909	15.5647	12.9138	26.8314	21.7204	14.2761
	41	116.488	88.9043	80.5328	115.023	96.24	93.4596											41	15.9977	13.4636	10.9474	25.0925	13.622	13.1273
	42	84.2496	91.0047	81.2425	123.056	96.6416	87.3395											42	11.8832	16.9474	5.44254	20.2812	18.6198	14.671
	43	106.845	101.97	94.7458	132.67	80.6977	84.94											43	15.3808	16.8311	5.64393	14.7027	15.2758	12.917
	44	80.0639	96.4211	101.825	119.621	112.507	99.9027											44	13.8066	15.3576	9.75776	22.3712	19.7152	15.5108
	45	109.484	89.5579	96.3794	138.036	122.108	107.9											45	12.9055	19.7528	5.77865	18.3073	19.012	14.419
	46	119.205	100.277	102.764	121.129	117.993	99.3852											46	15.7285	15.3156	10.5042	13.1854	15.6051	17.6276
	47	96.9777	106.841	104.193	117.935	118.552	105.382											47	12.5043	20.6747	5.15635	16.8127	14.5467	14.4012
	48	57.7524	81.9449	103.435	120.886	102.734	108.042											48	10.6008	14.6429	5.06014	24.11	17.0866	13.0778
	49	65.4287	86.7005	97.0764	121.492	118.384	109.606											49	12.7843	15.2067	5.3987	24.1094	22.4707	22.6109
	50	67.0605	109.722	104.453	94.9142	99.7536	108.654											50	12.6041	17.8613	7.14223	17.1224	15.4192	21.7824
	51	56.2178	112.625	101.453	124.137	106.328	108.087											51	13.9685	17.891	17.0344	17.6412	19.9367	11.1679
	52	56.8005	92.304	103.774	118.861	113.49	111.183											52	11.6724	20.3023	9.25785	35.9564	25.5037	16.7165
	53	73.2196	109.57	104.567	91.7839	110.044	111.358											53	11.1402	16.4877	8.96405	32.5615	27.8529	16.5456
	54	46.7861	117.411	100.89	102.915	92.8115	106.869											54	11.4807	23.8929	13.6061	24.9559	19.8024	11.6938
	55	49.8634	115.959	99.9892	87.7154	98.5198	108.078											55	11.5771	17.4058	10.1598	21.8917	22.9206	21.457
	56	39.4227	97.7325	103	76.2553	84.9937	101.88											56	12.2022	16.3992	8.31031	25.8466	22.4353	15.0514
	57	41.5328	107.339	94.1156	98.7425	83.1922	94.816											57	14.5415	13.7878	12.618	26.1399	21.8207	11.9606
	58	50.0341	104.028	100.567	81.6622	74.0066	98.2776											58	13.9434	18.4115	13.0356	11.9756	22.0868	19.0835
	59	35.0769	116.362	96.6942	87.1118	77.7936	89.5669											59	12.478	18.1609	18.3342	14.1256	10.9044	22.7978
	60	53.0443	108.783	80.0441	63.0437	78.505	98.8832											60	11.3247	19.0436	12.1015	18.8082	16.8819	18.9884
	61	48.2245	112.077	81.3582	52.5084	56.9596	78.9696											61	12.2625	21.9192	14.3952	18.1288	12.7011	19.0931
	62	34.0503	114.033	93.6992	44.8583	50.3657	97.6952											62	12.3319	19.7242	9.38167	15.1367	21.7318	18.8108
	63	27.6909	100.76	70.463	52.7891	73.3552	91.2546											63	11.3573	16.5869	14.7022	27.7889	15.8346	15.6914
	64	35.4606	99.6737	70.2583	41.5524	52.1283	73.776											64	12.7201	18.8474	9.22136	22.2181	24.8269	21.3028
	65	34.6157	97.8971	80.5121	40.8052	60.6993	83.467											65	12.6921	16.1976	12.5351	12.6291	23.5548	17.3607
	66	50.8297	112.713	65.5237	36.1914	74.2128	65.994											66	14.652	12.8895	10.6832	11.8935	19.4518	24.0613
	67	35.8187	95.7953	63.4956	42.2728	65.5705	53.771											67	13.1416	14.3637	10.1253	13.7644	16.9416	12.1362
	68	56.1881	110.478	53.2913	59.5188	37.7207	68.1924											68	11.991	17.8018	8.72539	15.4782	12.7884	18.5982
	69	42.6541	85.0352	53.4785	47.3182	32.0516	71.5319											69	14.435	14.1033	8.45449	8.7549	23.5942	13.57
	70	52.1135	68.0479	59.4436	28.9441	51.1078	66.249											70	12.3014	14.4009	13.2894	9.43111	12.7403	10.1022
	71	35.7551	69.4613	59.5693	32.4595	53.1957	79.0401											71	13.4173	16.8222	16.6258	9.81749	29.3719	14.5245
	72	35.9375	79.226	46.3483	26.0391	64.9721	86.1679											72	14.0534	14.0594	9.46565	8.25859	19.1466	17.6558
	73	32.6829	80.9999	56.3988	16.7843	49.7463	62.1242											73	13.1114	13.6615	5.72132	10.0769	22.9316	15.2752
	74	27.835	66.7543	48.7156	20.0777	52.9176	91.7308											74	16.9618	13.9776	10.0659	12.6591	20.2164	15.4905
	75	27.1465	50.4611	58.3068	18.8485	54.1713	67.1573											75	18.2234	17.0966	6.7552	17.7413	14.0226	18.0326
	76	32.1131	80.0478	46.7016	18.801	53.992	61.5258											76	12.52	13.9956	11.9594	11.4232	25.3685	17.328
	77	30.7751	65.0554	40.0403	20.9333	49.4869	77.9248											77	14.7309	15.2046	9.7493	16.1965	26.0123	20.4739
	78	26.6261	55.762	44.7077	21.1352	30.0577	67.207											78	18.4897	17.4566	9.39471	13.4494	22.5666	14.3966
	79	31.7261	83.074	47.3505	25.635	41.0483	54.0798											79	22.6088	14.6696	8.42672	11.2072	15.6923	21.5668
	80	30.8336	60.9843	34.2925	21.7651	38.2987	64.9718											80	24.0814	13.0492	11.5728	9.36182	32.6663	15.7291
	81	47.3535	57.4994	38.216	30.6684	38.2649	83.3796											81	17.9664	17.9313	13.0876	13.0255	17.6626	16.0291
	82	44.77	68.5864	54.4465	42.2143	48.4162	74.9016											82	21.0803	13.5484	12.4553	21.7196	15.4879	23.7177
	83	43.0836	52.1644	37.7813	30.6938	37.6806	65.3162											83	21.3707	17.7254	11.8954	31.4586	27.5623	19.1997
	84	39.3986	67.9519	27.391	32.4864	46.3863	76.5864											84	17.3501	17.9243	11.1062	19.3672	10.9597	20.5894
	85	58.4311	58.8985	53.4772	25.1323	29.3554	59.2797											85	23.6393	15.9649	8.21569	14.094	27.1392	19.8585
	86	37.1971	81.6081	41.156	24.2484	29.4197	50.1677											86	26.9815	18.2113	7.73783	17.9018	20.1255	23.2472
	87	67.4737	79.5414	54.6926	28.8014	26.1589	71.1404											87	15.7428	26.242	13.4695	27.3795	21.1066	18.0137
	88	44.0137	51.7821	46.6621	24.063	22.5056	83.128											88	18.834	23.2957	7.63027	10.2506	16.7454	12.2426
	89	33.0808	74.9728	58.2255	51.4796	29.1017	68.6296											89	16.0141	15.4845	9.20389	15.4536	30.9194	21.0549
	90	53.2718	84.8067	66.1998	41.3379	34.0676	54.6197											90	15.7072	17.868	14.4504	22.2654	18.0964	23.4215
	91	29.3928	73.4605	60.1299	56.4386	31.1448	66.1326											91	22.377	18.5269	15.7165	37.613	23.1693	22.693
	92	45.3397	74.6865	69.1583	36.2536	36.3828	64.3778											92	16.5775	14.5961	11.6821	26.9228	22.9097	25.6581
	93	42.1203	85.1611	50.6994	45.2311	26.8736	43.6149											93	15.1436	14.2429	18.0829	20.7243	19.3976	35.0786
	94	33.4624	86.5295	36.5819	30.8749	38.6621	42.6176											94	18.9853	17.5929	14.5599	14.548	12.1015	23.6499
	95	52.7468	84.965	46.51	44.4457	27.0828	33.2867											95	19.5067	26.4457	16.6587	29.8294	13.9675	29.8682
	96	41.8227	72.6351	58.5314	35.4132	26.4559	51.8208											96	17.6144	28.3367	8.51306	22.7666	14.9475	20.1425
	97	54.4883	64.7225	53.9579	42.6185	17.2426	43.3868											97	10.7909	24.975	8.46592	14.7144	23.916	23.3548
	98	44.8131	62.7914	44.8225	41.8047	21.1744	57.0791											98	13.1106	21.7889	9.02826	20.6564	17.5335	19.58
	99	58.1778	81.7066	42.3679	45.5952	32.5586	77.4469											99	13.3167	16.928	11.9185	15.4314	19.482	25.5428
	100	51.9756	68.0104	43.9821	51.7153	31.7667	71.8356											100	11.2358	21.4968	19.7727	40.615	14.4537	23.8494

## Sheet: Figure 3-figure supplement 1G
Figure 3-figure supplement 1G
Spine density of S1 and CA1 pyramidal neurons (spine # per um dendrite)
bas-: basal dendrite; obli-: oblique apical dendrite
											S1 neurons
		S1 neurons				CA1 neurons					Statistics summary
	Dendrite #	bas-wt	bas-mut	obli-wt	obli-mut	bas-wt	bas-mut	obli-wt	obli-mut		bas-mut vs bas-wt (Two-tailed unpaired t test with Welch's correction, passed D'Agostino & Pearson normality test)
	1	1.23921	0.761566	1.02717	0.615598	1.60173	1.29053	1.67553	1.55193		P value	9.605e-12
	2	1.62994	0.797533	1.42963	1.29169	1.33714	1.36762	1.98009	1.32242		P value summary	***
	3	1.95605	0.496923	0.925381	1.32435	1.86367	1.09217	2.13038	1.64665		Significantly different (P < 0.05)?	Yes
	4	1.88899	0.607533	1.05014	0.864221	1.67701	1.31648	1.66315	1.65793		obli-mut vs obli-wt (Two-tailed unpaired t test with Welch's correction, passed D'Agostino & Pearson normality test)
	5	1.576	0.949167	1.79738	1.06169	1.74902	1.36162	1.52725	1.31128		P value	5.64913e-05
	6	1.4682	0.870484	1.06889	0.767754	1.88294	1.37191	1.60208	1.5448		P value summary	***
	7	1.23077	0.687386	1.44862	1.04052	1.73989	1.28129	1.9187	1.11185		Significantly different (P < 0.05)?	Yes
	8	1.20127	0.805085	1.61167	0.874976	1.70379	1.28521	1.27999	1.03823
	9	1.19171	0.729146	1.50749	1.30883	1.85086	0.981932	1.69211	0.915398
	10	1.64806	0.761566	1.25637	0.657088	1.21549	1.15572	1.54171	1.0197
	11	1.86367	0.797533	1.04909	1.00577	1.77586	1.00744	1.59449	1.22184		CA1 neurons
	12	1.67701	0.527983	1.62465	0.733945	1.89957	0.985222	1.716	1.40098		Statistics summary
	13	1.72744	1.30712	1.46329	1.02669	1.34572	1.27843	1.63623	1.28747		bas-mut vs bas-wt (Two-tailed unpaired t test with Welch's correction, passed D'Agostino & Pearson normality test)
	14	1.83048	0.704	1.12973	1.14358	1.97239	1.21549	1.22225	1.30233		P value	8.61e-10
	15	1.51708	0.980917	1.18386	0.917661	1.77483	1.3319	1.58078	1.40724		P value summary	***
	16	1.14526	0.975927	1.5804	1.05199	1.91785	1.3212	1.88705	1.35696		Significantly different (P < 0.05)?	Yes
	17	1.52033	0.854544	1.61509	1.87954	1.69345	1.20521	1.77376	1.22477		obli-mut vs obli-wt (Two-tailed unpaired t test with Welch's correction, passed D'Agostino & Pearson normality test)
	18	1.71187	0.541019	1.14453	1.21988	1.97914	1.35863	1.63482	1.32174		P value	1.23e-08
	19	1.01937	1.34503	1.46467	1.09848	1.20292	1.07208	1.74357	1.23016		P value summary	***
	20	1.40647	0.647277	1.35731	1.15398	1.94238	1.35172	1.88365	0.963133		Significantly different (P < 0.05)?	Yes
	21	1.82784	1.04968	1.06664	0.815582	1.86321	1.0602	1.72488	1.31182
	22	1.27056	1.07003	1.35465	1.19079	1.33675	1.36162		1.21159
	23	1.36918	1.06373	1.07007	1.50839	1.79569	1.37174		1.50367
	24	1.09369	1.1009	1.19092	0.690735	1.3599	1.28041		1.52788
	25		1.472	1.02945	1.01899		1.30599		1.12952
	26		0.668554	1.29043	1.52122		1.28252		1.32498
	27		1.35215	1.19716	0.661654		0.873322		1.21991
	28		0.585676	1.07396	0.810995		1.01953		1.35469
	29		0.545897	1.44028	0.920999		1.21534		1.07263
	30		1.09449	1.46103	0.849411		1.07411		1.32331
	31		0.55883		0.533152		1.44747		1.19854
	32		0.632138		1.27962		1.37791		1.35928
	33		0.950428		0.591366		1.0919		1.56269
	34		0.567376		0.966028		1.28271		1.31186
	35		0.989743		1.08749		1.14776		1.7163
	36				1.22362		1.21978		1.10367
	37						1.32294		0.92522
	38						1.16511		0.839258
	39						1.33223		1.03076
	40						1.34862		1.69085
	41						0.88968		1.26433
	42						0.967611		1.77012
	43						1.12163		0.981223
	44						1.02448		1.08172
	45						1.31572		1.25397
	46								1.05106
	47								1.49547
	48								1.35565
	49								1.3105
	50								1.49693
	51								1.06664
