# Supplementary material for: 5'-UTR SNP of FGF13 causes translational defect and intellectual disability
Source: eLife. 2021 Jun 29;10:e63021. doi: 10.7554/eLife.63021 (PMC8241442; doi:10.7554/eLife.63021)
Supplement: Figure 3—source data 1. [file elife-63021-fig3-data1.xlsx]

## Sheet: Figure 3B-P0
Figure 3B
IUE, % neurons in each zone
E14.5 to P0		Layer II-IV
	Brain slice #	Fgf13WT	Fgf13Mut	Fgf13Mut+Vector	Fgf13Mut+FGF13			Statistics summary
	1	85.8696	63.6364	48.2143	58.9744			Fgf13Mut vs Fgf13WT (Two-tailed Mann Whitney U test)
	2	80.6897	71.9298	42.8	60.2273			P value					3.233e-08
	3	82.3171	74.5614	44.1734	56.1046			P value summary					***
	4	73.7374	53.7594	31.0345	47.7478			Significantly different (P < 0.05)?					Yes
	5	80.9524	54.0717	52.459	62.0339			Fgf13Mut+FGF13 vs Fgf13Mut+Vector (Two-tailed Mann Whitney U test)
	6	76.3158	55.3314	40.3013	62.0536			P value					0.0005
	7	74.3169	69.6629	47.1572	60.0877			P value summary					***
	8	84.3478	30.5913	33.9367	73.4177			Significantly different (P < 0.05)?					Yes
	9	80.6452	35.4906	52.1866	80
	10	78.866	59.2105	69.5652	75.5868
	11	71.875	47.8405	69.5238	55.4572
	12	83.8235	58.4906	61.745	62.9482
	13	76.9737	48.7106	54.0107	56.5656
	14	94.0476	58.5714	70.9459	80
	15	90.2913	49.3289	64.6226	73.1579
	16		64.8781	64.2512	69.7143
	17		55.1821	63.3136	75.7062
	18		56.1497	48.0916	61.6541
	19		74.0072	40.8333	76.7772
	20			54.8387	77.9661
	21			79.3333	78.3505
	22			72.5191	75.3086
	23			65.7778	58.8235
	24			76.3736	62.2407
	25			51.2727	59.8931
	26			53.0466	63.8009
	27				79.085
	28				76.6304
	29				76.2887
	30				74.1936
	31				83.0986
		Layer V-VI
	Brain slice #	Fgf13Wt	Fgf13Mut	Fgf13Mut+Vector	Fgf13Mut+FGF13			Statistics summary
	1	8.15217	25.5682	39.9554	39.1026			Fgf13Mut vs Fgf13wt (Two-tailed Mann Whitney U test)
	2	13.7931	19.7368	50.8	35.7955			P value					5.47423e-07
	3	7.31707	15.3509	44.7154	38.9535			P value summary					***
	4	11.1111	34.9624	60.815	45.946			Significantly different (P < 0.05)?					Yes
	5	12.381	21.8241	31.694	28.4746			Fgf13Mut+FGF13 vs Fgf13Mut+Vector (Two-tailed Mann Whitney U test)
	6	13.8158	27.3775	36.3465	21.875			P value					0.3193
	7	12.5683	26.9663	34.1137	24.5614			P value summary					ns
	8	5.21739	30.0771	56.7873	12.6582			Significantly different (P < 0.05)?					No
	9	10.7527	26.096	39.3586	8.125
	10	8.24742	15.4605	19.5652	15.9624
	11	16.25	21.2625	13.3333	21.8289
	12	5.14706	14.717	8.72483	19.9203
	13	8.55263	19.7708	11.7647	27.2727
	14	4.7619	12.8571	12.8378	6.47059
	15	2.91262	17.4497	9.90566	17.3684
	16		8.78049	15.942	13.1429
	17		24.6499	14.7929	14.6893
	18		16.8449	16.0305	17.2932
	19		14.0794	16.6667	12.3223
	20			6.45161	15.678
	21			14	10.3093
	22			9.1603	11.1111
	23			15.1111	20.5882
	24			8.24176	19.5021
	25			23.2727	13.369
	26			17.5627	16.2896
	27				10.4575
	28				8.69565
	29				9.79382
	30				9.21659
	31				7.51174
		WM
	Brain slice #	Fgf13Wt	Fgf13Mut	Fgf13Mut+Vector	Fgf13Mut+FGF13			Statistics summary
	1	5.97826	10.7955	11.8304	1.92308			Fgf13Mut vs Fgf13wt (Two-tailed Mann Whitney U test)
	2	5.51724	8.33333	6.4	3.97727			P value					0.0006
	3	10.3659	10.0877	11.1111	4.94186			P value summary					***
	4	15.1515	11.2782	8.15047	6.30631			Significantly different (P < 0.05)?					Yes
	5	6.66667	24.1042	15.847	9.49153			Fgf13Mut+FGF13 vs Fgf13Mut+Vector (Two-tailed Mann Whitney U test)
	6	9.86842	17.2911	23.3522	16.0714			P value					0.0121
	7	13.1148	3.37079	18.7291	15.3509			P value summary					*
	8	10.4348	39.3316	9.27602	13.924			Significantly different (P < 0.05)?					Yes
	9	8.60215	38.4134	8.45481	11.875
	10	12.8866	25.3289	10.8696	8.4507
	11	11.875	30.897	17.1429	22.7139
	12	11.0294	26.7924	29.5302	17.1315
	13	14.4737	31.5186	34.2246	16.1616
	14	1.19048	28.5714	16.2162	13.5294
	15	6.79612	33.2215	25.4717	9.47368
	16		26.3415	19.8068	17.1429
	17		20.1681	21.8935	9.60452
	18		27.0053	35.8779	21.0526
	19		11.9134	42.5	10.9005
	20			38.7097	6.35593
	21			6.66667	11.3402
	22			18.3206	13.5802
	23			19.1111	20.5882
	24			15.3846	18.2573
	25			25.4546	26.738
	26			29.3907	19.9095
	27				10.4575
	28				14.6739
	29				13.9175
	30				16.5899
	31				9.38967

## Sheet: Figure 3B-P7
Figure 3B
IUE, % neurons in each zone
E14.5 to P7		Layer II-IV
	Brain slice #	Fgf13WT	Fgf13Mut					Statistics summary
	1	97.4359	90.3141					Fgf13Mut vs Fgf13WT (Two-tailed Mann Whitney U test)
	2	96.7391	89					P value					0.0271
	3	100	87.7934					P value summary					*
	4	100	86.3354					Significantly different (P < 0.05)?					Yes
	5	98.7952	92.0455
	6	97.7011	89.7059
	7	97.6923	98.9583
	8	95.2055	98.1651
	9	93.2692	97.5
	10		93.578
	11		97.1963
	12		96.6387
		Layer V-VI
	Brain slice #	Fgf13WT	Fgf13Mut					Statistics summary
	1	1.28205	6.80628					Fgf13Mut vs Fgf13WT (Two-tailed Mann Whitney U test)
	2	1.08696	10.3333					P value					0.2388
	3	0	12.2066					P value summary					ns
	4	0	3.10559					Significantly different (P < 0.05)?					No
	5	1.20482	3.97727
	6	2.29885	1.47059
	7	0	1.04167
	8	2.05479	0.917431
	9	0.961538	0.833333
	10		0.917431
	11		0.934579
	12		0.840336
		WM
	Brain slice #	Fgf13WT	Fgf13Mut					Statistics summary
	1	1.28205	2.87958					Fgf13Mut vs Fgf13WT (Two-tailed Mann Whitney U test)
	2	2.17391	0.666667					P value					0.2342
	3	0	0					P value summary					ns
	4	0	10.559					Significantly different (P < 0.05)?					No
	5	0	3.97727
	6	0	8.82353
	7	2.30769	0
	8	2.73973	0.917431
	9	5.76923	1.66667
	10		5.50459
	11		1.86916
	12		2.52101

## Sheet: Figure 3D
Figure 3D
DIV4 cortical neurons from WT and Mut mice, ratio of polarized neurons and axon branching points
		Ratio of polarized neurons (%)									Ratio of polarized neurons (%)
	Experiment #	WT	Mut				Statistics summary			Experiment #	Mut+Vector	Mut+FGF13				Statistics summary
	1	75.8621	60				Mut vs WT (One-tailed Mann Whitney U test)			1	43.2836	71.4286				Mut+FGF13 vs Mut+Vector (One-tailed Mann Whitney U test)
	2	72.3684	59.375				P value	0.05		2	51.8518	58.3333				P value	0.004
	3	70.4545	58.0645				P value summary	*		3	50	57.1429				P value summary	**
							Significantly different (P < 0.05)?	Yes		4	50	70.9677				Significantly different (P < 0.05)?	Yes
										5	49.0385	65.9091
		Axon branching points									Axon branching points
	Neuron #	WT	Mut				Statistics summary			Neuron #	Mut+Vector	Mut+FGF13				Statistics summary
	1	2	4				Mut vs WT (One-tailed Mann Whitney U test)			1	10	2				Mut+FGF13 vs Mut+Vector (One-tailed Mann Whitney U test)
	2	1	3				P value	8.7785e-09		2	4	2				P value	<1.00E-15
	3	1	3				P value summary	***		3	5	3				P value summary	***
	4	1	3				Significantly different (P < 0.05)?	Yes		4	5	2				Significantly different (P < 0.05)?	Yes
	5	2	1							5	4	1
	6	3	2							6	5	4
	7	4	4							7	4	3
	8	3	7							8	3	1
	9	1	9							9	6	2
	10	5	6							10	4	2
	11	1	6							11	8	1
	12	1	4							12	5	2
	13	4	5							13	6	4
	14	3	3							14	4	3
	15	2	3							15	8	3
	16	4	1							16	6	2
	17	5	5							17	5	1
	18	4	4							18	4	3
	19	1	5							19	7	1
	20	5	5							20	3	3
	21	4	2							21	9	2
	22	3	4							22	6	6
	23	1	9							23	2	3
	24	1	1							24	5	5
	25	3	2							25	5	4
	26	4	6							26	9	5
	27	2	3							27	4	4
	28	3	5							28	9	1
	29	2	4							29	5	4
	30	2	3							30	5	3
	31	2	8							31	4	3
	32	2	3							32	4	2
	33	1	4							33	8	4
	34	3	5							34	3	3
	35	3	2							35	4	1
	36	3	3							36	2	3
	37	1	3							37	2	1
	38	4	1							38	6	2
	39	7	3							39	3	4
	40	1	3							40	4	3
	41	2	1							41	3	3
	42	2	2							42	4	1
	43	1	4							43	3	3
	44	3	2							44	3	3
	45	7	6							45	5	2
	46	4	5							46	7	1
	47	3	8							47	4	3
	48	4	7							48	8	2
	49	4	8							49	4	3
	50	2	7							50	6	2
	51	1	2							51	9	5
	52	1	1							52	9	5
	53	4	4							53	3	2
	54	4	2							54	6	4
	55	3	1							55	3	1
	56	3	3							56	7	3
	57	2	2							57	5	2
	58	5	3							58	4	1
	59	2	4							59	8	1
	60	1	6							60	7	2
	61	3	1							61	4	1
	62	5	1							62	2	4
	63	2	3							63	8	4
	64	7	2							64	4	4
	65	4	4							65	10	1
	66	5	4							66	4	2
	67	6	4							67	6	4
	68	3	3							68	3	3
	69	5	1							69	5	3
	70	2	3							70	2	3
	71	3	1							71	3	7
	72	1	5							72	1	4
	73	1	1							73	2	2
	74	2	6							74	3	1
	75	9	4							75	9	3
	76	2	3							76	5	1
	77	3	4							77	4	2
	78	1	3							78	5	1
	79	2	6							79	3	3
	80	3	9							80	7	2
	81	6	5							81	4	2
	82	1	3							82	2	5
	83	5	4							83	2	3
	84	4	11							84	3	3
	85	5	2							85	3	5
	86	3	4							86	2	2
	87	2	8							87	2	2
	88	3	4							88	3	4
	89	1	5							89	7	3
	90	4	4							90	2	1
	91	4	6							91	2	2
	92	4	9							92	2	4
	93	1	5							93	5	1
	94	2	9							94	5	2
	95	2	4							95	9	7
	96	1	6							96	4	5
	97	2	4							97	3	7
	98	3	4							98	2	4
	99	3	3							99	4	2
	100	1	2							100	5	3
	101	3	7							101	8	1
	102	2	9							102	8	2
	103	5	3							103	6	1
	104	2	7							104	5	4
	105	5	5							105	3	3
	106	3	4							106	6	2
	107	4	4							107	5	3
	108	4	11							108	2	2
	109	1	3							109	3	2
	110	2	3							110	5	2
	111	2	10							111	3	3
	112	1	6							112	2	1
	113	5	5							113	7	4
	114	5	5							114	6	3
	115	4	6							115	5	2
	116	1	11							116	5	1
	117	2	4							117	5	2
	118	4	3							118	4	4
	119	3	9							119	3	3
	120	1	5							120	7	3
	121	2	5							121	1	2
	122	3	1							122	4	1
	123	1	5							123	3	2
	124	2	2							124	5	2
	125	4	3							125	2	1
	126	4	2							126	3	3
	127	5	4							127	1	1
	128	4	7							128	3
	129	5	7							129	3
	130	3	6							130	3
	131	5	6							131	4
	132	1	2							132	3
	133	5	2							133	7
	134	2	4							134	3
	135	4	3							135	5
	136	3	4							136	4
	137	3	1							137	8
	138	5	6							138	7
	139	2	3							139	5
	140	1	3							140	5
	141	4	3							141	4
	142	5	6							142	7
	143	3	5							143	4
	144	2	4							144	5
	145	1	2							145	7
	146	7	3							146	4
	147	1	6							147	4
	148	6	4							148	4
	149	2	5							149	7
	150	4	8							150	3
	151	3	2							151	4
	152	1	6							152	6
	153	5	4							153	4
	154	4	12							154	5
	155	5	4							155	3
	156	3	5							156	4
	157	5	6							157	6
	158	2	3							158	4
	159	1	2							159	7
	160	3	4							160	4
	161	2								161	10
	162	4								162	4
	163	3								163	6
	164	5								164	6
	165	4								165	4
	166	1								166	5
	167	1								167	5
	168	6								168	5
	169	3								169	4
	170	4								170	2
	171	2								171	3
	172	2								172	4
	173	4								173	9
	174	3								174	3
	175	1								175	4
	176	3								176	2
	177	2								177	3
	178	1								178	2
	179	2								179	6
										180	4
										181	3
										182	5
										183	5
										184	4
										185	6
										186	3
										187	4
										188	6
										189	4
										190	3
										191	5
										192	6
										193	5
										194	3
										195	3
										196	5
										197	8
										198	3
										199	7
										200	2
										201	8
										202	3
										203	4
										204	10
										205	4
										206	5
										207	3
										208	5
										209	4
										210	3
										211	5
										212	6
										213	9
										214	7
										215	4
										216	4
										217	3
										218	4
										219	5
										220	5
										221	5
										222	6
										223	10
										224	5
										225	3
										226	4
										227	3
										228	8
										229	7
										230	4
										231	2
										232	2
										233	3
										234	5
										235	7
										236	4
										237	4
										238	4
										239	5
										240	5
										241	4
										242	4
										243	4
										244	4
										245	7
										246	3
										247	1
										248	4
										249	4
										250	9
										251	4
										252	6
										253	8
										254	4
										255	9
										256	8
										257	7
										258	5
										259	4
										260	9
										261	3
										262	3
										263	5
										264	6
										265	3
										266	3
										267	3
										268	4
										269	3
										270	7
										271	4
										272	7
										273	5
										274	5
										275	10
										276	5
										277	4
										278	3
										279	4
										280	5
										281	4
										282	5
										283	4
										284	3
										285	4
										286	7
										287	6
										288	1
										289	3
										290	4
										291	5
										292	5
										293	7
										294	10
										295	3

## Sheet: Figure 3F-upper
Figure 3F
IUE, E14.5 to P7, distribution of axon projection
Ipsilateral branching
		Signal intensity (% to ipsilateral layer V)															Statistics summary
		WT brain slice #					Mut brain slice #										Mut vs WT (Two-way ANOVA)
Relative position to Layer I (%)		1	2	3	4	5	1	2	3	4	5	6	7	8			Source of Variation	P value	P value summary		Significantly different (P < 0.05)?
	1	80.5706	80.5706	84.1531	88.8775	103.337	73.6349	128.807	71.4626	109.319	153.338	66.6197	66.4078	68.5159			Interaction	>0.9999	ns		No
	2	109.157	73.0345	93.8343	81.1553	118.073	74.4235	117.495	98.5804	117.707	174.961	95.8945	103.207	55.2923			Position	<0.0001	***		Yes
	3	118.238	78.5601	93.6306	87.6943	116.893	75.111	114.047	137.367	137.684	157.085	98.3962	126.046	66.9412			genotype	0.1401	ns		No
	4	127.418	80.8679	100.944	109.317	127.446	77.859	130.462	173.615	136.574	152.258	125.757	129.668	77.0289
	5	127.242	77.2722	104.388	124.664	136.565	91.418	118.659	174.161	107.04	152.163	125.287	144.523	73.9939
	6	144.696	76.6187	109.094	138.554	156.676	78.5404	149.447	169.757	111.541	180.979	116.524	149.171	83.1969
	7	156.045	68.6571	108.798	137.132	153.689	79.7597	135.813	174.066	135.58	176.705	120.58	136.283	82.3803
	8	136.097	96.9937	113.712	126.001	153.392	75.9545	121.602	148.02	188.14	164.044	129.332	136.272	77.3538
	9	156.987	112.524	115.68	141.147	146.548	75.7957	120.62	137.568	192.702	165.044	132.127	150.337	94.6783
	10	185.721	145.736	115.501	146.492	144.808	82.2079	110.889	149.804	232.382	183.356	145.015	152.292	103.18
	11	177.799	147.786	122.818	152.092	152.837	84.1185	163.686	155.377	175.271	141.345	143.035	147.539	103.652
	12	195.632	139.903	130.522	162.184	155.145	80.6393	185.027	166.867	165.758	177.31	134.515	150.095	127.879
	13	245.227	183.107	128.587	157.534	166.631	94.4719	155.163	160.825	227.664	163.226	129.557	159.747	120.989
	14	211.647	177.748	124.699	160.988	168.489	96.254	161.133	169.882	234.259	185.963	129.206	197.657	128.539
	15	191.436	160.427	120.728	168.822	168.537	101.21	172.822	177.114	231.798	184.981	135.634	215.934	137.301
	16	166.866	136.498	121.734	166.559	169.282	92.6376	155.47	172.919	247.466	170.34	137.372	198.614	142.816
	17	227.279	147.812	128.029	167.846	170.52	89.4772	185.902	180.986	253.226	180.104	152.713	248.453	170.749
	18	188.301	128.157	131.537	169.128	170.148	112.582	273.936	175.455	237.359	180.134	148.228	234.92	187.71
	19	188.697	193.415	133.204	170.56	170.649	152.993	216.198	173.424	259.757	190.298	172.764	214.307	195.151
	20	182.594	227.225	133.415	170.049	170.615	144.142	264.72	174.332	258.251	156.884	176.57	196.282	223.111
	21	191.884	174.11	132.496	168.917	168.772	141.458	211.621	183.661	270.402	154.328	174.943	211.379	218.287
	22	212.455	219.124	133.429	169.418	169.331	157.959	234.72	183.055	227.115	131.573	171.812	228.408	228.144
	23	279.57	239.802	133.039	167.38	165.964	194.882	253.768	186.546	255.24	121.337	170.281	225.746	218.219
	24	307.108	234.122	131.803	164.874	164.7	201.715	272.572	197.639	251.573	95.7613	172.019	265.254	216.75
	25	322.765	239.306	131.674	146.751	163.339	194.402	256.305	202.345	212.999	64.0172	178.074	259.877	211.309
	26	315.624	243.254	128.615	145.86	158.789	210.189	260.416	201.729	202.621	54.9219	177.82	227.673	220.916
	27	333.044	220.895	124.26	146.25	138.28	204.948	210.672	197.162	187.842	44.4476	158.038	212.168	223.472
	28	311.567	203.367	119.729	114.003	132.469	194.585	238.087	193.128	129.542	41.7152	153.928	168.586	229.115
	29	283.044	177.904	101.182	101.989	125.348	192.196	185.611	174.54	144.589	38.671	126.531	150.816	236.963
	30	249.583	158.365	96.4802	92.6539	119.045	169.03	162.33	165.588	102.51	36.2466	102.121	144.043	235.581
	31	229.994	147.788	93.7443	83.0579	123.885	127.918	133.417	140.563	77.2128	40.2704	78.5005	120.345	229.523
	32	181.246	128.832	90.2106	73.7751	100.527	103.907	126.902	103.525	71.2674	45.4943	84.0451	81.325	226.694
	33	148.497	89.4374	91.4605	79.562	91.683	115.092	122.73	90.5577	73.2938	49.8235	65.8234	70.6075	212.537
	34	124.292	75.1705	91.8725	76.8014	87.3589	92.3599	76.7446	80.3091	82.741	57.1626	71.6391	75.0642	199.104
	35	100.574	86.4311	90.3228	79.179	86.4099	90.0312	79.6708	67.1971	85.4601	58.619	58.4783	71.7528	187.742
	36	85.1594	68.6963	89.9097	76.7589	86.1063	107.873	61.2567	80.3698	76.7137	61.9358	75.2788	69.0869	195.256
Ipsilateral layer V region	37	82.3255	57.9569	86.4352	81.0302	79.2014	82.3417	56.3341	88.1047	71.0834	73.9094	78.8874	58.3894	183.521			Statistics summary
	38	88.1632	60.804	78.8459	81.6318	86.9076	87.025	59.639	88.8431	78.2513	78.9731	77.7854	66.6513	182.309			Layer V region, Mut vs WT (Two-way ANOVA)
	39	95.035	60.6056	86.9094	83.4758	86.4916	93.7143	54.0371	75.6255	81.1454	76.714	78.2224	72.8338	138.874			Source of Variation	P value	P value summary		Significantly different (P < 0.05)?
	40	89.1415	67.3419	91.0242	96.9549	97.3898	111.427	47.8594	77.0156	93.2913	105.769	87.171	88.572	116.588			Interaction	0.9972	ns		No
	41	88.5048	85.1803	87.1176	98.1192	97.3243	90.1567	63.384	77.6176	80.1565	112.277	86.9872	87.8316	116.762			Position	0.0044	**		Yes
	42	94.3029	86.9	88.5449	108.673	107.409	99.5165	60.9405	81.32	101.165	93.2923	84.4835	71.1277	126.282			genotype	0.4405	ns		No
	43	101.347	79.2793	88.9231	99.9101	117.3	96.587	61.9875	91.7619	97.688	116.022	87.2103	68.3468	116.811
	44	93.91	95.0625	89.4542	107.506	115.117	81.873	62.7852	87.9435	121.661	118.906	90.9742	78.2419	107.189
	45	100.282	77.6193	90.348	102.457	105.865	96.4223	62.4368	91.6703	127.749	98.968	81.4053	87.674	101.276
	46	99.4008	87.2532	93.344	106.652	107.86	88.7682	70.7033	98.5836	131.402	117.981	91.8594	77.226	98.8887
	47	102	84.1622	93.7012	108.791	107.692	105.41	79.2276	120.932	106.803	91.6695	102.707	92.9861	106.857
	48	100.538	113	93.8857	105.624	116.027	108.275	93.3302	111.837	116.972	96.0718	111.605	99.9393	103.188
	49	101.444	105.399	99.2272	99.9003	107.078	111.667	87.9623	114.973	104.577	94.0372	121.73	102.398	133.259
	50	99.4457	106.351	97.2262	100.474	108.626	105.769	102.978	108.259	117.099	83.443	119.453	86.134	118.832
	51	96.6614	87.4581	99.6847	93.4853	115.717	89.5641	107.079	109.477	95.4706	102.906	132.794	101.072	123.752
	52	111.751	103.087	100.051	94.4551	134.404	102.505	106.256	106.027	100.434	115.031	126.9	97.2248	114.834
	53	112.909	106.904	94.0751	89.1715	132.359	94.4492	110.818	119.308	116.728	96.9338	115.582	111.86	109.389
	54	123.606	104.984	104.574	85.3388	119.073	120.239	107.332	104.393	128.073	87.4666	106.869	107.082	120.738
	55	110.328	107.178	100.118	90.2964	121.228	111.924	132.689	106.174	107.417	90.2138	114.508	101.449	130.602
	56	114.272	110.76	89.4583	78.1771	111.391	100.864	114.696	101.459	95.3721	99.9717	111.002	82.0466	128.458
	57	126.126	102.797	90.4344	76.4264	105.964	94.1536	123.342	110.469	93.4377	81.2717	106.228	86.5848	117.438
	58	118.313	91.1778	88.859	74.0639	105.868	95.5335	118.919	109.563	102.303	78.5469	106.119	94.2385	114.352
	59	88.9708	103.286	90.2386	74.0241	111.439	99.3613	112.571	103.936	91.4047	82.8092	107.077	81.7951	119.132
	60	100.946	103.733	89.0915	70.3776	100.633	110.16	120.812	96.3988	92.7472	83.3322	90.7359	95.9692	115.909
	61	103.922	103.229	86.4699	70.7791	103.089	89.6796	107.888	90.3883	98.1385	66.7172	87.594	82.6583	125.694
	62	99.8267	90.5978	82.9405	71.1674	100.01	97.484	115.371	81.3583	112.212	74.0394	102.323	81.623	115.155
	63	99.8983	73.8958	86.7105	77.0145	92.6635	89.1574	105.243	86.3939	90.2258	63.9796	85.3671	57.8489	118.287
	64	94.6137	90.2257	83.2977	78.5095	97.38	72.7323	91.2901	72.6987	83.3817	57.2212	89.8679	71.1882	108.535
	65	86.7664	95.3818	82.1905	67.63	101.496	91.321	87.2471	72.2501	72.0164	51.9637	86.1785	50.4349	95.8473
	66	88.8027	83.5614	78.2823	73.5068	97.4397	89.0489	76.2446	83.2852	87.8716	58.5945	81.0222	55.6772	106.901
	67	84.5595	92.8146	73.4683	69.1177	91.4571	84.2841	85.1022	77.613	78.8665	59.3999	80.966	56.0288	105.446
	68	86.3597	71.1155	82.2255	70.8974	99.9014	97.4085	84.3628	77.2857	73.0793	43.4291	88.4862	57.1472	99.5196
	69	86.8845	77.4042	93.291	76.2274	92.447	87	96.1941	88.1177	78.3531	55.9874	91.9856	62.2739	104.059
	70	86.3372	74.2102	84.1061	66.0048	89.7347	79.1659	76.9386	76.0048	69.327	57.2012	83.2981	65.2532	107.178
	71	80.3734	73.2811	77.2142	68.7932	100.997	78.9104	101.409	74.9872	77.9834	62.4558	87.1827	62.706	104.055
	72	89.4854	78.9302	78.5172	74.0393	85.7009	77.9377	91.7557	74.2278	73.5764	50.8891	87.6683	61.8472	132.293
	73	89.0113	82.1179	79.0413	80.8177	100.236	83.8742	83.3105	83.1974	68.4775	56.7439	93.6616	63.0774	121.628
	74	85.3019	83.8302	85.3774	83.026	92.1778	84.5061	95.8565	85.0249	66.6714	72.1757	73.426	56.6142	113.387
	75	83.9916	83.2464	74.7509	70.4748	98.2254	73.5916	90.0343	83.3535	80.2091	68.7989	89.3981	58.1327	104.554
	76	84.8257	64.9356	79.6389	72.3375	94.2693	69.7885	91.367	79.1775	73.249	60.6986	89.4406	63.0091	91.1649
	77	81.5052	80.7806	76.0636	72.0712	100.057	84.7399	87.1221	70.0504	74.8253	61.6677	88.8448	72.9358	87.1908
	78	74.2093	76.4148	71.7267	71.6814	96.0464	99.7567	104.75	80.6335	75.4389	77.9644	90.5651	67.2547	85.2106
	79	78.6988	56.625	77.3633	63.5879	108.714	76.9009	100.361	81.1317	71.7369	70.7408	79.2116	55.8665	77.8325
	80	63.0862	81.9112	77.5236	70.3202	97.8144	71.0818	85.6904	83.4889	64.0765	71.9419	88.0025	54.2337	86.4103
	81	65.6046	71.5887	67.337	69.2984	102.666	62.6634	81.2154	80.9992	68.793	67.3564	78.3141	46.2947	86.6569
	82	58.0989	80.7086	77.5997	70.9505	97.7005	58.7645	81.6129	79.4393	70.2731	67.3795	62.2963	54.3235	88.7318
	83	59.3566	76.0349	75.3102	63.502	100.269	67.8726	60.6491	84.7359	66.519	64.0094	78.8205	55.9144	85.7944
	84	50.4429	61.0034	68.2461	73.1435	86.2074	71.73	59.9892	91.4058	67.353	78.3677	64.317	56.9442	85.4427
	85	36.4465	60.1011	62.798	61.2236	91.566	84.544	45.5694	81.0333	63.5834	90.9792	76.7337	47.5409	69.9595
	86	38.0748	59.6429	64.7026	61.5248	92.3031	75.3445	44.2318	65.4259	62.7423	59.625	70.5238	37.162	77.0364
	87	43.7304	47.8132	58.2333	58.9277	79.6924	61.1172	49.2509	70.8159	65.8285	60.8026	61.7293	52.9918	79.3429
	88	44.2358	41.9791	50.9172	47.5196	72.5736	60.7708	59.9198	85.733	67.6441	76.5779	53.8667	52.9644	64.7921
	89	49.6132	46.2094	48.5679	60.8795	58.3741	51.6621	73.3909	54.0676	64.4011	80.2068	57.9041	46.6838	71.4018
	90	54.6652	48.2177	55.9049	58.6593	66.5552	62.1883	73.4598	56.1023	60.8592	61.887	72.2909	54.288	86.828
	91	64.4617	67.1414	52.9648	53.9439	68.8165	94.0276	74.9446	65.6378	57.0061	71.65	80.5949	52.2277	90.1013
	92	74.626	82.5737	51.7109	60.7139	68.883	87.5288	66.195	72.8737	47.8326	61.9103	82.6238	42.9301	83.0327
	93	75.3835	82.9006	54.5236	57.2117	69.7398	94.21	60.2461	86.707	44.4974	64.7042	77.1104	51.8894	119.287
	94	75.1886	86.6748	63.7664	73.1912	61.6216	114.174	52.1368	120.376	60.1156	58.4605	73.0615	63.4712	149.513
	95	95.9623	86.8681	74.4563	98.0981	75.9766	100.393	72.2267	116.918	62.3796	71.6214	89.6036	68.0567	162.234
	96	59.6265	74.5442	70.305	87.8955	77.493	93.432	83.5996	120.752	74.6857	89.3263	65.2427	75.9192	124.307
	97	60.1465	58.921	75.0033	95.4563	77.4855	79.071	67.5769	106.733	88.0177	78.1087	101.763	60.2941	100.197
	98			75.4314	98.4623	80.1283	79.2624	58.3652	122.531	112.394	94.5108		75.5286	75.9287
	99			76.2259	84.3359	78.877	64.8114		123.072	100.003	119.747		81.9283	60.901
	100				75.1831	74.7638	53.9068			74.0627	121.091		74.903

## Sheet: Figure 3F-lower
Figure 3F
IUE, E14.5 to P7, distribution of axon projection
Contralateral branching (S1)
		Signal intensity (% to ipsilateral layer V)															Statistics summary
		WT brain slice #					Mut brain slice #										Mut vs WT (Two-way ANOVA)
Relative position to Layer I (%)		1	2	3	4	5	1	2	3	4	5	6	7	8			Source of Variation	P value	P value summary		Significantly different (P < 0.05)?
	1	13.6029	11.575	3.72006	6.03835	9.29026	33.5085	12.6568	7.40184	12.4901	5.98255	7.96211	7.88388	10.8246			Interaction	0.971	ns		No
	2	13.8889	13.7479	4.19878	6.62293	10.731	31.3587	16.3444	8.64435	10.949	5.95681	8.22227	7.453	10.8095			Position	<1.00E-15	***		Yes
	3	14.478	13.2356	6.05657	6.06172	9.13974	32.9028	17.272	10.5802	11.7121	6.23378	7.74826	7.38362	11.5317			genotype	<1.00E-15	***		Yes
	4	15.2112	14.3307	4.73506	7.01923	8.40272	37.1134	18.158	9.93648	11.0937	6.34189	7.59772	12.3425	10.8718
	5	15.0637	12.6827	6.73454	6.62371	9.57143	31.0574	24.0619	10.8161	11.52	6.28819	7.9698	9.23939	10.5041
	6	16.5661	13.1474	7.18878	7.77025	8.59722	32.474	24.2267	11.72	14.1684	6.26764	8.48233	8.19544	10.6668
	7	17.159	17.853	6.5762	7.71959	9.68428	43.5357	24.2668	12.6822	12.3395	6.58127	8.20849	7.33107	10.9639
	8	18.9624	15.8258	6.45066	7.69721	8.46516	43.614	23.8541	11.4202	14.2769	6.75349	10.0274	8.40501	10.9622
	9	19.1104	15.3947	7.34904	8.17569	9.55838	43.5228	30.4162	12.5023	14.609	7.38843	13.513	11.1009	11.2402
	10	18.3895	16.4046	6.24352	6.56149	8.80246	46.4361	26.8541	13.7117	13.278	9.0502	12.0878	14.5824	11.5191
	11	19.9103	19.2104	6.63472	6.15696	8.55324	49.1375	22.7808	14.0371	15.4475	12.4224	16.9791	11.2765	11.1627
	12	20.3086	14.1318	6.96075	6.84556	8.25394	39.4321	28.0514	15.1152	11.0084	11.3756	13.3069	11.3544	11.7228
	13	17.6231	16.2669	7.25822	6.97642	8.8476	38.3354	21.4377	21.2937	10.9928	8.84281	11.0131	12.4086	11.5815
	14	19.0652	17.4338	6.63371	7.27451	8.66139	36.0415	18.3302	19.5892	12.9108	8.3199	11.5672	11.792	11.0062
	15	18.5323	17.2914	7.77023	7.25454	7.98073	42.1184	23.53	19.0257	12.7981	10.1606	10.6591	12.7422	10.6345
	16	18.7705	17.8693	6.74945	7.56486	8.4529	37.9667	25.1441	20.3822	14.4588	8.74316	12.0302	13.6996	11.6161
	17	20.0395	16.1632	7.06379	7.47086	7.6756	41.8927	23.8974	20.0706	14.106	8.11749	11.8491	10.4953	11.5779
	18	18.8397	15.2015	7.07783	6.98093	7.47147	40.6501	21.3594	22.053	14.0582	9.45041	10.609	9.3616	10.839
	19	17.5624	14.6018	7.76728	6.40202	6.78688	35.7696	21.7874	17.2152	11.1	8.8049	9.69252	9.04632	10.8213
	20	18.3352	14.6411	6.28773	6.26309	7.40436	36.3303	25.332	18.7947	15.479	9.72097	9.25638	10.8601	10.5986
	21	19.8562	13.6609	6.04449	6.1254	6.98893	36.3217	26.597	17.4477	10.3648	8.42997	8.45481	16.041	9.89585
	22	19.3595	13.5291	6.23808	6.21542	7.3861	37.7984	23.8351	16.2392	9.58526	8.46991	7.98662	11.8966	10.4463
	23	16.5195	13.5148	6.0635	5.92309	7.71197	37.3395	23.8151	17.9935	10.242	8.14457	8.92772	11.941	11.1241
	24	15.426	14.3881	5.58113	6.10755	7.93858	35.755	26.2701	18.7324	11.3179	7.94188	7.57862	10.6599	10.4181
	25	14.6831	14.324	5.81101	5.95793	7.23849	36.9979	26.3598	19.8044	11.8668	7.52527	8.15419	9.9683	10.6338
	26	14.1144	13.9175	5.69685	6.43455	7.27897	36.8299	21.5288	16.637	10.9064	7.91529	7.28968	12.4856	10.73
	27	14.2065	13.5906	5.95563	6.40475	7.72949	37.2968	17.8112	15.087	11.1175	7.98084	6.7782	9.64375	10.3283
	28	13.6799	12.9858	6.13741	6.63083	8.28641	34.6128	15.9943	14.7067	9.77445	8.48091	8.26482	8.10339	10.247
	29	13.4968	12.452	6.16181	6.30766	7.72681	38.0801	16.3391	16.035	9.73856	7.33487	7.96457	7.91489	9.90357
	30	13.8064	12.5292	5.79897	6.23596	7.83813	44.7467	16.5699	15.3031	8.81675	7.56961	7.4629	8.43994	10.2144
	31	13.7745	12.2456	5.91556	6.93142	8.53369	43.931	15.4975	15.2081	9.89775	7.68397	6.77343	8.07877	10.1724
	32	14.812	12.2346	6.52967	7.21413	8.30269	44.9514	16.398	17.5485	10.7758	8.13585	7.45549	8.26331	10.0651
	33	14.1375	12.0843	6.30601	7.42334	8.83153	39.6775	15.878	15.4131	9.85633	8.51583	7.2495	8.23714	10.0453
	34	14.6093	12.1346	6.20978	7.94894	9.36831	43.9338	15.325	14.8477	9.5314	9.18376	6.87754	8.18541	10.0724
	35	14.836	11.1467	6.37538	6.91178	9.1284	48.3679	15.8661	14.9201	9.06717	8.92384	7.00662	8.4134	10.2512
	36	15.5263	11.1238	6.4836	6.51219	8.73663	43.4462	14.1641	17.6164	9.76933	8.17178	7.69403	8.65927	11.3178
	37	16.6337	11.5793	6.70572	6.98838	10.0439	43.6237	14.1276	18.4604	11.7072	9.43725	9.15325	8.58494	9.94198
	38	16.0284	11.5862	6.78941	5.77886	10.2104	44.3543	15.076	17.9735	10.7564	9.47284	8.39706	9.41427	11.2542
	39	17.1445	11.5991	6.81623	6.8008	8.93859	45.3985	14.49	18.0054	11.5623	10.649	8.34272	8.90484	10.3129
	40	15.8589	12.7124	7.54422	6.35566	9.45298	39.5817	17.0547	17.1187	13.0958	9.5235	9.85852	9.98217	10.6733
	41	16.7273	11.9349	7.70176	7.17426	10.4246	44.2913	16.2091	17.1	11.0268	9.95581	10.1412	10.3013	10.2543
	42	17.8377	12.4788	6.62204	7.79676	10.4575	44.743	17.0884	16.1666	11.8297	10.4483	9.93774	10.7823	10.324
	43	16.6181	13.0556	7.76067	8.61686	10.6482	44.8843	16.862	16.9385	11.3297	12.8011	9.36022	11.3355	11.1668
	44	16.6474	14.7792	7.07847	8.71588	11.0043	43.4947	14.8066	18.3811	11.4436	14.5663	11.0575	10.2344	11.8221
	45	15.861	13.7353	8.20252	8.89244	11.421	52.2311	15.9722	20.8968	11.5272	11.9306	11.9209	10.3766	13.4242
	46	16.3921	14.0955	7.85964	7.50561	11.6355	50.1354	14.8219	24.5863	10.642	10.875	13.8062	11.056	11.9572
	47	16.6011	15.0462	8.19306	8.58477	10.7405	48.7952	15.4009	23.8236	11.9286	16.1424	15.6755	11.1045	12.5837
	48	15.8106	13.5573	8.22196	8.07505	11.4352	44.9731	14.0074	22.7133	11.9464	16.0626	18.1489	12.0283	11.4463
	49	16.3433	13.6231	8.2042	7.44722	9.3357	46.3094	15.3914	21.0491	11.6064	13.9353	20.4054	9.9286	11.6096
	50	18.6896	14.8888	8.16604	7.9223	8.82747	49.4416	16.1276	18.5187	11.3947	13.9762	19.9083	11.58	12.7745
	51	20.0987	15.9624	7.54841	7.19767	8.09558	51.2894	14.376	18.3958	12.7317	14.3672	15.1375	10.8823	11.9188
	52	16.5177	17.7686	7.12333	6.46301	8.49309	48.9202	16.3939	20.0119	11.6047	14.5875	12.8365	11.2858	13.0053
	53	18.2558	17.6662	7.04744	6.73222	7.75463	51.1569	16.8774	20.2334	12.8057	12.5525	16.6687	9.73872	13.88
	54	18.822	16.6651	6.20898	7.6808	7.48318	62.7869	18.4647	20.1204	12.8849	13.5742	16.6305	9.5298	14.3168
	55	18.607	16.7153	6.31699	7.49846	7.71959	64.9704	17.8449	19.7855	12.9287	13.5505	17.7499	11.5831	16.0157
	56	19.412	17.7487	6.45014	7.29589	7.90231	59.8818	16.4782	16.9259	12.3499	15.5394	18.5007	12.2806	16.1901
	57	18.7756	17.4974	6.2167	6.88633	7.86083	58.0768	17.8408	16.7505	15.1534	14.5592	16.1453	13.4732	15.3544
	58	18.4946	17.188	6.1822	8.38781	8.27843	66.1878	15.5477	19.6316	12.2453	13.8534	20.1836	12.7774	15.2134
	59	21.6282	15.8575	6.4202	9.89829	7.94418	57.8719	17.5345	21.8497	13.0172	16.9495	21.8742	12.5854	14.6551
	60	19.9521	15.4123	6.42075	9.8127	9.00745	60.1037	19.674	24.6233	14.664	16.1724	17.7571	10.1336	14.5479
	61	19.6542	14.7535	6.58976	11.271	9.45913	56.3778	18.3519	25.9008	13.8905	13.4617	16.7094	8.85198	17.052
	62	17.9484	14.5603	7.70117	10.2246	10.3043	57.2409	20.687	26.1313	13.3523	15.1516	18.4243	10.1162	19.4971
	63	22.5916	15.7568	8.30889	9.10527	8.23025	66.4427	19.1501	22.7567	15.2323	18.8168	14.7594	12.9499	18.1331
	64	19.5399	15.0138	6.52774	12.9147	8.0149	65.0227	20.7777	24.5707	14.3396	21.9238	14.2308	13.076	18.6831
	65	18.8535	18.6792	6.81868	10.6651	9.33509	44.5213	20.1312	25.0387	14.3166	17.9266	15.5358	10.2794	17.4435
	66	18.7797	20.009	7.19405	9.9885	10.0172	68.3451	20.8092	28.4866	14.2787	18.5349	20.138	11.0871	18.4233
	67	20.3131	17.8266	7.27348	11.1609	9.46605	62.0472	19.0479	23.1854	14.1858	15.4303	17.7953	12.2605	19.9489
	68	21.3588	22.8164	6.57988	12.0717	9.93821	61.6865	20.3688	25.8546	13.2045	17.2131	18.112	11.9904	22.822
	69	21.7103	21.411	8.23864	14.0481	11.5235	72.0744	22.5784	26.8665	15.3674	18.2585	21.6874	12.6472	22.7471
	70	23.5827	22.8288	8.65626	13.149	11.8796	64.9751	26.6144	23.8436	14.2542	21.1607	23.1181	12.4975	24.6983
	71	22.9733	21.4409	9.0667	14.1625	11.0118	72.4441	25.1108	28.7633	14.0265	19.7526	27.3734	14.0415	26.7594
	72	21.6707	21.0926	9.77423	12.9877	14.0673	77.2944	27.557	32.1119	16.216	17.0029	30.8918	15.0486	22.9532
	73	22.5357	22.314	11.4494	11.2695	12.2683	65.2267	22.9118	34.8055	18.9248	24.3862	32.5982	22.3002	30.9883
	74	25.7513	20.5112	12.3723	11.7373	14.7551	72.1082	24.4681	35.8783	18.2716	28.3726	31.47	19.6637	25.9599
	75	22.062	20.8441	12.711	13.5916	15.3278	71.8053	20.6393	36.2109	18.0854	31.9194	27.6242	17.1469	24.9237
	76	22.901	22.5425	12.3018	12.6271	14.9391	84.1799	20.8574	38.5963	17.59	23.0142	28.6454	17.6654	26.9286
	77	21.9911	19.8393	14.1061	13.1744	16.2965	76.4771	24.6252	37.7288	18.0863	27.3059	26.7629	18.6262	26.4193
	78	22.0187	19.4953	13.108	13.7188	16.605	76.2805	30.4076	40.235	23.9246	27.1801	21.0717	20.8733	28.6075
	79	21.796	18.877	14.4047	10.9204	17.3228	74.848	26.0372	46.6808	27.8025	33.4086	25.2656	17.6319	33.138
	80	20.8268	16.8234	12.7285	11.1269	15.0687	85.9073	27.1092	42.4555	21.966	29.9496	31.1475	19.0211	30.0453
	81	24.4897	20.2759	12.5331	12.7338	14.6739	75.1345	28.7846	46.0176	21.8028	36.4075	31.4689	20.3405	27.95
	82	30.6721	18.8036	14.9918	13.8533	15.3143	82.4349	28.0657	43.8457	23.9351	45.5456	39.9672	20.0542	28.5488
	83	29.8416	19.7231	14.6037	14.0887	18.2093	91.0321	29.3844	42.1542	24.8507	43.3531	37.7947	19.2901	26.0539
	84	30.1011	19.1243	14.836	14.8735	18.6612	97.1082	25.8714	46.0339	26.6334	40.603	41.984	18.4333	24.8968
	85	32.8885	19.1628	15.1449	13.4186	17.4912	89.3265	33.234	40.864	28.5312	37.8604	41.4694	21.0871	25.9967
	86	35.785	18.9382	13.4863	15.617	16.9814	88.8045	27.0785	50.2637	28.8836	32.3808	42.463	19.1009	27.6309
	87	35.3035	20.4878	13.5053	17.1552	16.3454	84.9215	24.7266	49.4914	31.6255	40.4903	37.1315	15.7469	24.8344
	88	36.2649	19.7171	13.1646	15.4539	16.0081	84.1689	30.2585	41.6788	30.1798	43.3948	47.7484	22.6803	24.4935
	89	35.8318	22.8828	12.4703	17.0193	18.5111	77.5462	36.2618	41.8466	31.2425	46.1287	50.9014	21.8461	26.5513
	90	43.8843	19.0596	13.0968	15.6773	16.3166	91.8021	36.9836	47.0672	32.1355	52.7394	51.7015	22.3667	26.3417
	91	49.5586	19.2809	17.3125	17.7832	16.0371	109.389	28.8476	55.3454	30.5736	52.5328	44.7456	20.6563	28.9666
	92	52.2799	21.664	19.2058	16.858	16.8249	128.917	35.4349	57.5228	27.5792	60.7321	52.8242	20.3726	31.8037
	93	52.3463	21.8256	23.4728	19.1971	26.1192	117.636	40.4345	52.9846	38.8758	75.6767	56.9351	22.6499	30.5675
	94	41.7916	22.44	20.9423	18.7818	24.613	129.672	39.6157	55.5811	38.9215	54.8927	69.9841	21.851	30.936
	95	26.8139	24.9461	19.8458	25.0745	26.4229	128.384	37.5554	63.8406	45.7662	51.5998	74.8658	30.8038	34.909
	96	26.5007	27.5766	19.4107	32.6678	23.77	121.055	39.7951	42.0525	54.6995	44.5093	80.6379	27.8174	28.6612
	97		26.2891	17.0952	32.3722	24.5649	104.556	33.7448	38.7663	53.7538	37.338	92.9969	31.7326	35.7984
	98			13.4542	26.7415	24.7675	110.984	30.483	36.4288	43.4575	22.9081		29.1487	33.5712
	99			11.1611	20.3271	20.562	90.6328	28.155	29.0311	37.4595	22.5165		32.3576	29.732
	100				18.5839	17.9987	93.7693	17.4255		33.7077	17.8028		26.0733
