# Supplementary material for: 5'-UTR SNP of FGF13 causes translational defect and intellectual disability
Source: eLife. 2021 Jun 29;10:e63021. doi: 10.7554/eLife.63021 (PMC8241442; doi:10.7554/eLife.63021)
Supplement: Figure 4—figure supplement 1—source data 1. [file elife-63021-fig4-figsupp1-data1.xlsx]

## Sheet: Figure 4-figure supplement 1A
Figure 4-figure supplement 1A
Polysome profiling, percentage of Fgf13/Gapdh mRNA (normalize to input), 6 WT and 6 Mut mice (Figure 4B selects WT-1 and Mut-1 here)
		WT-Fgf13									Mut-Fgf13
	Fraction #	1	2	3	4	5	6			Fraction #	1	2	3	4	5	6
	1	0.0796666	0.0299007	0.13223	0.125762	1.20048	0.786009			1	0.0384268	0.0995943	0.059405	0.0087715	0.151204	0.227205
	2	0.173218	0.332324	0.142638	0.335209	0.317192	0.457345			2	0.267951	0.379533	0.0815019	0.0709089	0.222177	0.221366
	3	0.22762	0.289061	0.179102	0.429125	0.426714	0.226833			3	0.4258	0.145405	0.21111	0.0347686	0.220457	0.252652
	4	0.850431	0.821756	0.555741	2.30189	0.972011	0.611716			4	1.32801	0.919266	0.695528	0.565474	1.10737	0.776157
	5	2.44625	3.15774	1.39309	2.29468	3.14726	1.21179			5	2.91688	1.67309	2.04659	2.95277	2.79925	2.00592
	6	2.84597	1.62778	1.68545	2.29673	2.2098	1.83272			6	1.82899	1.69988	2.11192	2.38675	2.20929	1.738
	7	2.9505	1.02571	1.78104	1.68685	2.25153	1.26614			7	2.6296	1.77481	2.17852	1.82505	2.25404	1.82704
	8	5.84489	2.86942	3.06109	7.45852	6.3082	2.27933			8	6.34759	4.42207	3.31067	6.6408	4.37464	8.30808
	9	3.6925	3.79669	7.38332	9.05294	6.12037	7.35812			9	3.37931	8.23096	6.67149	7.67514	11.0972	7.86182
	10	7.19037	9.5003	5.76386	10.9936	9.06911	6.99986			10	11.126	6.37468	8.23931	6.33738	8.68829	10.7099
	11	11.0128	11.3648	10.4132	10.7155	9.67332	12.1301			11	13.0823	11.9146	9.8474	10.2889	10.9229	8.48506
	12	13.4949	13.4332	10.854	11.6221	10.67	11.1995			12	12.7973	11.4801	11.2404	11.884	13.2038	9.47211
	13	14.3505	16.9014	12.237	11.8453	11.2885	14.6233			13	11.9983	16.3927	14.684	17.1105	15.4792	13.4974
	14	14.8345	13.9275	16.1668	14.6589	15.1787	17.4698			14	11.6285	13.4439	15.7732	13.6886	11.6721	14.3284
	15	10.8454	12.5672	19.3454	7.33748	12.7429	14.2899			15	11.0258	11.6556	12.9305	10.9106	8.91505	12.5319
	16	9.16051	8.35524	8.90606	6.84547	8.42388	7.25757			16	9.1793	9.39384	9.91853	7.61954	6.68304	7.75703
		WT-Gapdh									Mut-Gapdh
	Fraction #	1	2	3	4	5	6			Fraction #	1	2	3	4	5	6
	1	0.609515	0.296422	0.42609	0.61669	0.893273	0.779115			1	0.493896	0.468672	0.279452	0.213917	0.294507	0.371864
	2	1.71683	0.799691	0.62025	2.07438	0.838875	0.602684			2	1.65592	1.25403	0.979552	0.934967	0.798032	0.868073
	3	6.49367	6.19478	3.74048	10.4876	8.54545	4.20978			3	7.03658	5.07714	7.26717	12.5701	7.81659	8.58466
	4	4.61415	6.57291	4.53263	9.33951	6.62194	8.01849			4	3.76997	4.84131	3.31269	10.3941	4.82534	3.80098
	5	3.36639	4.7501	3.40029	4.4197	4.32504	3.00708			5	5.79938	2.97955	2.67609	10.4384	4.43783	4.23026
	6	2.48718	1.59634	2.85269	1.78158	2.36245	3.50916			6	1.69082	1.9779	1.43601	1.97413	2.06793	1.63276
	7	3.53251	1.49053	3.18487	5.04313	3.48412	1.334			7	4.77042	1.25411	1.53445	1.46007	2.17259	3.39371
	8	5.57349	3.29182	10.3523	3.58052	5.07633	8.22591			8	4.194	3.9139	3.48693	4.77718	3.95116	4.25861
	9	2.1463	1.21722	3.58226	3.48203	2.03706	3.43672			9	2.03705	3.72406	1.61093	2.26176	2.82734	2.6634
	10	4.36088	3.54232	4.33808	4.83728	5.20158	3.65581			10	5.50425	2.72729	3.90528	2.71536	4.78209	4.5856
	11	4.70344	3.29165	4.46179	6.93536	4.31248	4.68875			11	3.55418	0.780068	4.50065	2.22934	4.82709	3.80599
	12	8.16367	6.83586	5.21614	7.33558	7.62588	5.36742			12	7.07867	1.04837	8.55111	7.71112	6.24767	4.7599
	13	8.81575	12.2732	8.63609	9.59541	6.47748	9.55577			13	7.21077	11.3909	10.7879	7.97413	10.0016	9.72751
	14	11.156	11.2762	10.5515	10.7367	9.94867	12.5296			14	11.1315	16.5668	14.6838	8.35525	12.8059	12.8812
	15	15.5525	15.3802	20.0407	11.33	18.4804	15.3161			15	16.1951	23.7734	19.6234	15.1129	15.3415	16.7494
	16	16.7077	21.1908	14.0639	8.40457	13.769	15.7636			16	17.8775	18.2225	15.3646	10.8773	16.8028	17.6861

## Sheet: Figure 4-figure supplement 1B
Figure 4-figure supplement 1B
Polysome profiling, overall mRNA levels by UV absorption profiles (254 nm); qPCR result of input Fgf13 mRNA
		OD 254 nm				mRNA level (normalize to Gapdh)					Statistics summary
Fraction #	Measure time (s)	WT	Mut			Mouse #	WT-FGF13	Mut-FGF13			Mut-FGF13 vs WT-FGF13 (Two-tailed Mann Whitney U test)
2	87.204	1.031	1.031			1	1.06252	1.12754			P value					>0.9999
	87.407	1.031	1.031			2	0.972594	1.04346			P value summary					ns
	87.61	1.031	1.031			3	0.964884	0.920876			Significantly different (P < 0.05)?					No
	87.813	1.031	1.031
	88.015	1.031	1.031
	88.218	1.031	1.031
	88.421	1.031	1.031
	88.624	1.031	1.031
	88.827	1.031	1.031
	89.029	1.031	1.031
	89.232	1.031	1.031
	89.435	1.031	1.031
	89.638	1.031	1.031
	89.841	1.031	1.031
	90.043	1.031	1.031
	90.246	1.031	1.031
	90.449	1.031	1.031
	90.652	1.031	1.031
	90.855	1.031	1.031
	91.057	1.031	1.031
	91.26	1.031	1.031
	91.463	1.031	1.031
	91.666	1.031	1.031
	91.869	1.031	1.031
	92.071	1.031	1.031
	92.274	1.031	1.031
	92.477	1.031	1.031
	92.68	1.031	1.031
	92.883	1.031	1.031
	93.085	1.031	1.031
	93.288	1.031	1.031
	93.491	1.031	1.031
	93.694	1.031	1.031
	93.897	1.031	1.031
	94.099	1.031	1.031
	94.302	1.031	1.031
	94.505	1.031	1.031
	94.708	1.031	1.031
	94.911	1.031	1.031
	95.113	1.031	1.031
	95.316	1.031	1.031
	95.519	1.031	1.031
	95.722	1.031	1.031
	95.925	1.031	1.031
	96.127	1.031	1.031
	96.33	1.031	1.031
	96.533	1.031	1.031
	96.736	1.031	1.031
	96.939	1.031	1.031
	97.141	1.031	1.031
	97.344	1.031	1.031
	97.547	1.031	1.031
	97.75	1.031	1.031
	97.953	1.031	1.031
	98.155	1.031	1.031
	98.358	1.031	1.031
	98.561	1.031	1.031
	98.764	1.031	1.031
	98.967	1.031	1.031
	99.169	1.031	1.031
	99.372	1.031	1.031
	99.575	1.031	1.031
	99.778	1.031	1.031
	99.981	1.031	1.031
	100.183	1.031	1.031
	100.386	1.031	1.031
	100.589	1.031	1.031
	100.792	1.031	1.031
	100.995	1.031	1.031
	101.197	1.031	1.031
	101.4	1.031	1.031
	101.603	1.031	1.031
	101.806	1.031	1.031
	102.009	1.031	1.031
	102.211	1.031	1.031
	102.414	1.031	1.031
	102.617	1.031	1.031
	102.82	1.031	1.031
	103.023	1.031	1.031
	103.225	1.031	1.031
	103.428	1.031	1.031
	103.631	1.031	1.031
	103.834	1.031	1.031
	104.037	1.031	1.031
	104.239	1.031	1.031
	104.442	1.031	1.031
	104.645	1.031	1.031
	104.848	1.031	1.031
	105.051	1.031	1.031
	105.253	1.031	1.031
	105.456	1.031	1.031
	105.659	1.031	1.031
	105.862	1.031	1.031
	106.065	1.031	1.031
	106.267	1.031	1.031
	106.47	1.031	1.031
	106.673	1.031	1.031
	106.876	1.031	1.031
	107.079	1.031	1.031
	107.281	1.031	1.031
	107.484	1.031	1.031
	107.687	1.031	1.031
	107.89	1.031	1.031
	108.093	1.031	1.031
	108.295	1.031	1.031
	108.498	1.031	1.031
	108.701	1.031	1.031
	108.904	1.031	1.031
	109.107	1.031	1.031
	109.309	1.031	1.031
	109.512	1.031	1.031
	109.715	1.031	1.031
	109.918	1.027	1.031
	110.121	1.017	1.031
	110.323	1.007	1.031
	110.526	0.997	1.031
	110.729	0.987	1.031
	110.932	0.978	1.031
	111.135	0.968	1.031
	111.337	0.959	1.031
	111.54	0.95	1.029
	111.743	0.941	1.02
	111.946	0.933	1.01
	112.149	0.924	1.002
	112.351	0.916	0.993
	112.554	0.907	0.984
	112.757	0.899	0.976
	112.96	0.891	0.967
	113.163	0.883	0.959
	113.365	0.876	0.951
	113.568	0.868	0.943
	113.771	0.861	0.935
	113.974	0.854	0.927
	114.177	0.847	0.919
	114.379	0.84	0.912
	114.582	0.832	0.904
	114.785	0.826	0.897
	114.988	0.82	0.89
	115.191	0.814	0.883
	115.393	0.808	0.876
	115.596	0.802	0.869
	115.799	0.796	0.862
	116.002	0.79	0.855
3	116.205	0.784	0.849
	116.407	0.778	0.842
	116.61	0.772	0.835
	116.813	0.766	0.829
	117.016	0.761	0.823
	117.219	0.755	0.817
	117.421	0.75	0.811
	117.624	0.745	0.805
	117.827	0.738	0.799
	118.03	0.734	0.791
	118.233	0.729	0.786
	118.435	0.725	0.781
	118.638	0.72	0.776
	118.841	0.716	0.771
	119.044	0.712	0.766
	119.247	0.708	0.761
	119.449	0.704	0.756
	119.652	0.699	0.751
	119.855	0.695	0.746
	120.058	0.69	0.742
	120.261	0.686	0.737
	120.463	0.683	0.732
	120.666	0.679	0.728
	120.869	0.675	0.723
	121.072	0.672	0.719
	121.275	0.669	0.714
	121.477	0.665	0.71
	121.68	0.662	0.705
	121.883	0.658	0.701
	122.086	0.654	0.698
	122.289	0.65	0.694
	122.491	0.645	0.69
	122.694	0.641	0.686
	122.897	0.637	0.681
	123.1	0.632	0.676
	123.303	0.629	0.671
	123.505	0.625	0.666
	123.708	0.621	0.662
	123.911	0.618	0.657
	124.114	0.615	0.653
	124.317	0.612	0.649
	124.519	0.61	0.645
	124.722	0.608	0.642
	124.925	0.604	0.639
	125.128	0.602	0.635
	125.331	0.6	0.632
	125.533	0.598	0.629
	125.736	0.596	0.627
	125.939	0.594	0.624
	126.142	0.591	0.621
	126.345	0.588	0.618
	126.547	0.586	0.615
	126.75	0.583	0.612
	126.953	0.579	0.609
	127.156	0.576	0.605
	127.359	0.573	0.602
	127.561	0.57	0.599
	127.764	0.567	0.596
	127.967	0.564	0.593
	128.17	0.562	0.59
	128.373	0.559	0.587
	128.575	0.557	0.584
	128.778	0.554	0.581
	128.981	0.552	0.578
	129.184	0.549	0.576
	129.387	0.547	0.573
	129.589	0.545	0.57
	129.792	0.543	0.567
	129.995	0.541	0.565
	130.198	0.539	0.563
	130.401	0.537	0.56
	130.603	0.535	0.558
	130.806	0.533	0.556
	131.009	0.531	0.554
	131.212	0.529	0.552
	131.415	0.527	0.549
	131.617	0.525	0.548
	131.82	0.523	0.546
	132.023	0.521	0.544
	132.226	0.519	0.542
	132.429	0.518	0.539
	132.631	0.517	0.537
	132.834	0.516	0.535
	133.037	0.515	0.533
	133.24	0.514	0.531
	133.443	0.512	0.528
	133.645	0.51	0.527
	133.848	0.507	0.525
	134.051	0.505	0.522
	134.254	0.503	0.521
	134.457	0.501	0.519
	134.659	0.499	0.517
	134.862	0.497	0.515
	135.065	0.495	0.513
	135.268	0.493	0.512
	135.471	0.491	0.51
	135.673	0.489	0.509
	135.876	0.488	0.507
	136.079	0.486	0.505
	136.282	0.485	0.504
	136.485	0.483	0.502
	136.687	0.482	0.5
	136.89	0.481	0.499
	137.093	0.479	0.497
	137.296	0.478	0.496
	137.499	0.476	0.494
	137.701	0.475	0.493
	137.904	0.474	0.491
	138.107	0.473	0.49
	138.31	0.472	0.488
	138.513	0.471	0.487
	138.715	0.47	0.486
	138.918	0.469	0.484
	139.121	0.467	0.483
	139.324	0.466	0.482
	139.527	0.464	0.48
	139.729	0.463	0.479
	139.932	0.462	0.478
	140.135	0.461	0.476
	140.338	0.46	0.475
	140.541	0.458	0.474
	140.743	0.457	0.472
	140.946	0.456	0.471
	141.149	0.455	0.47
	141.352	0.454	0.469
	141.555	0.453	0.468
	141.757	0.452	0.467
	141.96	0.451	0.466
	142.163	0.45	0.464
	142.366	0.449	0.463
	142.569	0.448	0.462
	142.772	0.446	0.461
	142.974	0.445	0.46
	143.177	0.445	0.459
	143.38	0.444	0.458
	143.583	0.443	0.457
	143.785	0.443	0.456
	143.988	0.442	0.455
	144.191	0.441	0.454
	144.394	0.44	0.453
	144.597	0.439	0.452
	144.8	0.437	0.451
	145.002	0.437	0.45
4	145.205	0.435	0.449
	145.408	0.434	0.448
	145.611	0.433	0.447
	145.814	0.432	0.446
	146.016	0.431	0.445
	146.219	0.43	0.445
	146.422	0.429	0.444
	146.625	0.428	0.443
	146.828	0.428	0.442
	147.03	0.427	0.442
	147.233	0.426	0.441
	147.436	0.425	0.44
	147.639	0.424	0.439
	147.842	0.424	0.438
	148.044	0.423	0.438
	148.247	0.422	0.437
	148.45	0.421	0.436
	148.653	0.421	0.436
	148.856	0.42	0.435
	149.058	0.419	0.434
	149.261	0.418	0.434
	149.464	0.418	0.434
	149.667	0.417	0.433
	149.87	0.416	0.433
	150.072	0.416	0.432
	150.275	0.415	0.431
	150.478	0.415	0.431
	150.681	0.414	0.43
	150.884	0.413	0.43
	151.086	0.412	0.429
	151.289	0.412	0.428
	151.492	0.411	0.428
	151.695	0.41	0.427
	151.898	0.41	0.427
	152.1	0.409	0.427
	152.303	0.409	0.427
	152.506	0.408	0.426
	152.709	0.407	0.426
	152.912	0.407	0.425
	153.114	0.407	0.425
	153.317	0.406	0.425
	153.52	0.406	0.425
	153.723	0.405	0.425
	153.926	0.405	0.424
	154.128	0.404	0.424
	154.331	0.404	0.424
	154.534	0.404	0.424
	154.737	0.404	0.424
	154.94	0.404	0.425
	155.142	0.403	0.425
	155.345	0.403	0.425
	155.548	0.403	0.424
	155.751	0.403	0.424
	155.954	0.402	0.424
	156.156	0.402	0.424
	156.359	0.402	0.424
	156.562	0.402	0.424
	156.765	0.401	0.424
	156.968	0.401	0.424
	157.17	0.401	0.424
	157.373	0.401	0.424
	157.576	0.401	0.424
	157.779	0.401	0.424
	157.982	0.401	0.424
	158.184	0.401	0.425
	158.387	0.402	0.425
	158.59	0.402	0.425
	158.793	0.402	0.425
	158.996	0.402	0.425
	159.198	0.402	0.425
	159.401	0.402	0.426
	159.604	0.403	0.426
	159.807	0.403	0.426
	160.01	0.403	0.426
	160.212	0.403	0.427
	160.415	0.403	0.427
	160.618	0.403	0.427
	160.821	0.404	0.427
	161.024	0.404	0.427
	161.226	0.404	0.427
	161.429	0.404	0.427
	161.632	0.405	0.428
	161.835	0.405	0.428
	162.038	0.405	0.428
	162.24	0.406	0.428
	162.443	0.406	0.428
	162.646	0.406	0.428
	162.849	0.406	0.428
	163.052	0.406	0.428
	163.254	0.406	0.428
	163.457	0.407	0.428
	163.66	0.407	0.428
	163.863	0.407	0.428
	164.066	0.407	0.428
	164.268	0.407	0.428
	164.471	0.407	0.428
	164.674	0.407	0.428
	164.877	0.407	0.428
	165.08	0.407	0.428
	165.282	0.408	0.428
	165.485	0.408	0.427
	165.688	0.408	0.427
	165.891	0.408	0.427
	166.094	0.407	0.427
	166.296	0.407	0.427
	166.499	0.407	0.426
	166.702	0.407	0.426
	166.905	0.407	0.426
	167.108	0.407	0.425
	167.31	0.407	0.425
	167.513	0.407	0.425
	167.716	0.407	0.424
	167.919	0.407	0.424
	168.122	0.407	0.424
	168.324	0.406	0.423
	168.527	0.406	0.423
	168.73	0.406	0.422
	168.933	0.405	0.422
	169.136	0.405	0.421
	169.338	0.404	0.421
	169.541	0.404	0.42
	169.744	0.404	0.419
	169.947	0.404	0.419
	170.15	0.403	0.418
	170.352	0.403	0.418
	170.555	0.403	0.417
	170.758	0.402	0.416
	170.961	0.401	0.416
	171.164	0.401	0.415
	171.366	0.401	0.415
	171.569	0.4	0.414
	171.772	0.4	0.413
	171.975	0.399	0.412
	172.178	0.398	0.412
	172.38	0.398	0.41
	172.583	0.398	0.41
	172.786	0.397	0.409
	172.989	0.397	0.408
	173.192	0.396	0.407
	173.394	0.395	0.407
	173.597	0.395	0.406
	173.8	0.394	0.405
	174.003	0.394	0.404
5	174.206	0.393	0.403
	174.408	0.392	0.403
	174.611	0.392	0.401
	174.814	0.391	0.401
	175.017	0.391	0.4
	175.22	0.39	0.399
	175.422	0.389	0.398
	175.625	0.389	0.398
	175.828	0.388	0.397
	176.031	0.387	0.396
	176.234	0.387	0.395
	176.436	0.386	0.395
	176.639	0.385	0.394
	176.842	0.385	0.392
	177.045	0.384	0.392
	177.248	0.383	0.391
	177.45	0.383	0.39
	177.653	0.382	0.389
	177.856	0.381	0.389
	178.059	0.38	0.388
	178.262	0.38	0.387
	178.464	0.379	0.386
	178.667	0.379	0.386
	178.87	0.378	0.385
	179.073	0.377	0.384
	179.276	0.377	0.383
	179.478	0.376	0.382
	179.681	0.375	0.382
	179.884	0.374	0.381
	180.087	0.373	0.38
	180.29	0.373	0.379
	180.492	0.372	0.379
	180.695	0.371	0.378
	180.898	0.37	0.377
	181.101	0.37	0.376
	181.304	0.369	0.376
	181.506	0.368	0.375
	181.709	0.367	0.374
	181.912	0.367	0.374
	182.115	0.366	0.373
	182.318	0.365	0.372
	182.52	0.365	0.371
	182.723	0.364	0.371
	182.926	0.363	0.37
	183.129	0.362	0.37
	183.332	0.362	0.369
	183.534	0.361	0.368
	183.737	0.361	0.368
	183.94	0.36	0.367
	184.143	0.359	0.366
	184.346	0.359	0.366
	184.548	0.358	0.365
	184.751	0.358	0.365
	184.954	0.357	0.364
	185.157	0.356	0.363
	185.36	0.356	0.363
	185.562	0.355	0.362
	185.765	0.355	0.362
	185.968	0.354	0.361
	186.171	0.353	0.361
	186.374	0.353	0.36
	186.576	0.352	0.36
	186.779	0.352	0.359
	186.982	0.351	0.359
	187.185	0.351	0.358
	187.388	0.35	0.358
	187.59	0.35	0.357
	187.793	0.349	0.357
	187.996	0.349	0.356
	188.199	0.349	0.356
	188.402	0.348	0.355
	188.604	0.347	0.355
	188.807	0.347	0.355
	189.01	0.347	0.354
	189.213	0.346	0.353
	189.416	0.346	0.353
	189.618	0.346	0.353
	189.821	0.345	0.352
	190.024	0.345	0.352
	190.227	0.345	0.352
	190.43	0.344	0.351
	190.632	0.344	0.351
	190.835	0.344	0.35
	191.038	0.343	0.35
	191.241	0.343	0.349
	191.444	0.343	0.349
	191.646	0.343	0.349
	191.849	0.342	0.349
	192.052	0.342	0.348
	192.255	0.341	0.348
	192.458	0.341	0.347
	192.66	0.341	0.347
	192.863	0.341	0.347
	193.066	0.34	0.347
	193.269	0.34	0.346
	193.472	0.34	0.346
	193.674	0.339	0.346
	193.877	0.339	0.345
	194.08	0.339	0.345
	194.283	0.338	0.344
	194.486	0.338	0.344
	194.688	0.338	0.344
	194.891	0.338	0.344
	195.094	0.337	0.343
	195.297	0.337	0.343
	195.5	0.337	0.343
	195.702	0.337	0.343
	195.905	0.336	0.342
	196.108	0.336	0.342
	196.311	0.336	0.342
	196.514	0.335	0.341
	196.716	0.335	0.341
	196.919	0.335	0.341
	197.122	0.335	0.341
	197.325	0.335	0.34
	197.528	0.334	0.34
	197.73	0.334	0.34
	197.933	0.334	0.34
	198.136	0.333	0.339
	198.339	0.333	0.339
	198.542	0.333	0.338
	198.744	0.332	0.338
	198.947	0.332	0.338
	199.15	0.332	0.338
	199.353	0.332	0.338
	199.556	0.332	0.338
	199.758	0.331	0.337
	199.961	0.331	0.337
	200.164	0.331	0.337
	200.367	0.331	0.337
	200.57	0.331	0.337
	200.772	0.331	0.337
	200.975	0.33	0.336
	201.178	0.33	0.336
	201.381	0.33	0.336
	201.584	0.329	0.336
	201.786	0.329	0.336
	201.989	0.329	0.335
	202.192	0.329	0.335
	202.395	0.329	0.335
	202.598	0.329	0.335
	202.8	0.329	0.335
	203.003	0.329	0.335
6	203.206	0.328	0.335
	203.409	0.328	0.335
	203.612	0.328	0.334
	203.814	0.328	0.334
	204.017	0.328	0.334
	204.22	0.328	0.334
	204.423	0.328	0.334
	204.626	0.328	0.334
	204.828	0.328	0.334
	205.031	0.328	0.334
	205.234	0.328	0.334
	205.437	0.328	0.334
	205.64	0.328	0.334
	205.842	0.328	0.334
	206.045	0.328	0.334
	206.248	0.328	0.334
	206.451	0.328	0.334
	206.654	0.328	0.334
	206.856	0.329	0.334
	207.059	0.329	0.334
	207.262	0.329	0.335
	207.465	0.329	0.335
	207.668	0.33	0.335
	207.87	0.33	0.335
	208.073	0.331	0.335
	208.276	0.331	0.336
	208.479	0.332	0.336
	208.682	0.332	0.337
	208.884	0.332	0.337
	209.087	0.333	0.337
	209.29	0.334	0.338
	209.493	0.334	0.338
	209.696	0.335	0.338
	209.898	0.336	0.339
	210.101	0.337	0.34
	210.304	0.338	0.34
	210.507	0.338	0.341
	210.71	0.34	0.342
	210.912	0.341	0.343
	211.115	0.342	0.343
	211.318	0.343	0.344
	211.521	0.344	0.345
	211.724	0.346	0.346
	211.926	0.347	0.347
	212.129	0.348	0.348
	212.332	0.35	0.349
	212.535	0.351	0.35
	212.738	0.352	0.351
	212.94	0.354	0.353
	213.143	0.356	0.354
	213.346	0.358	0.356
	213.549	0.359	0.357
	213.752	0.361	0.358
	213.954	0.362	0.36
	214.157	0.364	0.361
	214.36	0.365	0.362
	214.563	0.367	0.364
	214.766	0.368	0.365
	214.968	0.37	0.366
	215.171	0.371	0.367
	215.374	0.373	0.368
	215.577	0.374	0.37
	215.78	0.376	0.371
	215.982	0.377	0.372
	216.185	0.379	0.374
	216.388	0.38	0.375
	216.591	0.382	0.376
	216.794	0.383	0.377
	216.996	0.384	0.379
	217.199	0.385	0.38
	217.402	0.386	0.381
	217.605	0.387	0.382
	217.808	0.388	0.383
	218.01	0.389	0.384
	218.213	0.39	0.385
	218.416	0.391	0.386
	218.619	0.392	0.387
	218.822	0.392	0.388
	219.024	0.393	0.389
	219.227	0.394	0.389
	219.43	0.394	0.39
	219.633	0.395	0.391
	219.836	0.395	0.392
	220.038	0.396	0.392
	220.241	0.397	0.393
	220.444	0.397	0.394
	220.647	0.397	0.394
	220.85	0.397	0.395
	221.052	0.397	0.395
	221.255	0.398	0.395
	221.458	0.398	0.396
	221.661	0.398	0.396
	221.864	0.398	0.396
	222.066	0.398	0.397
	222.269	0.398	0.397
	222.472	0.398	0.397
	222.675	0.397	0.397
	222.878	0.397	0.397
	223.08	0.397	0.397
	223.283	0.397	0.397
	223.486	0.397	0.397
	223.689	0.396	0.397
	223.892	0.396	0.397
	224.094	0.395	0.397
	224.297	0.395	0.397
	224.5	0.395	0.397
	224.703	0.394	0.397
	224.906	0.394	0.397
	225.108	0.394	0.397
	225.311	0.393	0.396
	225.514	0.392	0.396
	225.717	0.392	0.395
	225.92	0.391	0.395
	226.122	0.391	0.394
	226.325	0.39	0.394
	226.528	0.389	0.394
	226.731	0.389	0.393
	226.934	0.388	0.392
	227.136	0.388	0.392
	227.339	0.387	0.391
	227.542	0.386	0.391
	227.745	0.385	0.39
	227.948	0.384	0.389
	228.15	0.383	0.388
	228.353	0.382	0.387
	228.556	0.382	0.386
	228.759	0.381	0.386
	228.962	0.38	0.385
	229.164	0.379	0.384
	229.367	0.378	0.383
	229.57	0.377	0.382
	229.773	0.377	0.382
	229.976	0.376	0.38
	230.178	0.375	0.38
	230.381	0.374	0.379
	230.584	0.373	0.378
	230.787	0.372	0.377
	230.99	0.371	0.376
	231.192	0.37	0.375
	231.395	0.37	0.374
	231.598	0.369	0.373
	231.801	0.368	0.372
	232.004	0.367	0.371
7	232.206	0.366	0.37
	232.409	0.365	0.37
	232.612	0.364	0.368
	232.815	0.364	0.368
	233.018	0.363	0.367
	233.22	0.362	0.366
	233.423	0.361	0.365
	233.626	0.361	0.364
	233.829	0.36	0.363
	234.032	0.359	0.362
	234.234	0.359	0.362
	234.437	0.358	0.361
	234.64	0.358	0.361
	234.843	0.357	0.36
	235.046	0.356	0.359
	235.248	0.356	0.359
	235.451	0.355	0.358
	235.654	0.355	0.357
	235.857	0.354	0.356
	236.06	0.353	0.356
	236.262	0.353	0.355
	236.465	0.353	0.355
	236.668	0.352	0.355
	236.871	0.352	0.354
	237.074	0.351	0.354
	237.276	0.351	0.353
	237.479	0.35	0.353
	237.682	0.35	0.352
	237.885	0.349	0.352
	238.088	0.349	0.351
	238.29	0.348	0.35
	238.493	0.348	0.35
	238.696	0.347	0.35
	238.899	0.347	0.349
	239.102	0.347	0.349
	239.304	0.346	0.348
	239.507	0.346	0.348
	239.71	0.346	0.347
	239.913	0.345	0.347
	240.116	0.345	0.347
	240.318	0.345	0.346
	240.521	0.344	0.346
	240.724	0.344	0.346
	240.927	0.344	0.346
	241.13	0.344	0.346
	241.332	0.344	0.345
	241.535	0.344	0.345
	241.738	0.344	0.345
	241.941	0.344	0.345
	242.144	0.344	0.345
	242.346	0.344	0.345
	242.549	0.344	0.345
	242.752	0.344	0.345
	242.955	0.344	0.345
	243.158	0.344	0.345
	243.36	0.345	0.345
	243.563	0.345	0.345
	243.766	0.345	0.345
	243.969	0.346	0.345
	244.172	0.346	0.345
	244.374	0.346	0.345
	244.577	0.347	0.345
	244.78	0.348	0.345
	244.983	0.349	0.346
	245.186	0.349	0.346
	245.388	0.35	0.346
	245.591	0.351	0.347
	245.794	0.352	0.347
	245.997	0.354	0.348
	246.2	0.355	0.349
	246.402	0.357	0.35
	246.605	0.358	0.35
	246.808	0.361	0.351
	247.011	0.362	0.352
	247.214	0.365	0.353
	247.416	0.367	0.355
	247.619	0.37	0.356
	247.822	0.373	0.358
	248.025	0.376	0.359
	248.228	0.38	0.361
	248.43	0.384	0.363
	248.633	0.388	0.365
	248.836	0.392	0.368
	249.039	0.397	0.37
	249.242	0.403	0.373
	249.444	0.409	0.376
	249.647	0.418	0.38
	249.85	0.425	0.385
	250.053	0.433	0.389
	250.256	0.44	0.394
	250.458	0.449	0.399
	250.661	0.458	0.404
	250.864	0.467	0.409
	251.067	0.477	0.415
	251.27	0.487	0.421
	251.472	0.498	0.428
	251.675	0.509	0.434
	251.878	0.521	0.442
	252.081	0.533	0.449
	252.284	0.546	0.457
	252.486	0.559	0.465
	252.689	0.572	0.474
	252.892	0.586	0.483
	253.095	0.6	0.492
	253.298	0.614	0.501
	253.5	0.628	0.511
	253.703	0.642	0.521
	253.906	0.657	0.531
	254.109	0.671	0.542
	254.312	0.686	0.552
	254.515	0.7	0.563
	254.717	0.714	0.574
	254.92	0.728	0.585
	255.123	0.741	0.596
	255.326	0.754	0.607
	255.528	0.768	0.618
	255.731	0.78	0.629
	255.934	0.792	0.639
	256.137	0.804	0.65
	256.34	0.816	0.661
	256.542	0.826	0.671
	256.745	0.842	0.681
	256.948	0.852	0.692
	257.151	0.861	0.707
	257.354	0.87	0.716
	257.557	0.878	0.726
	257.759	0.886	0.735
	257.962	0.893	0.744
	258.165	0.899	0.752
	258.368	0.905	0.76
	258.571	0.911	0.768
	258.773	0.916	0.775
	258.976	0.92	0.783
	259.179	0.924	0.789
	259.382	0.928	0.795
	259.584	0.931	0.801
	259.787	0.933	0.807
	259.99	0.936	0.811
	260.193	0.937	0.816
	260.396	0.939	0.82
	260.598	0.939	0.824
	260.801	0.94	0.827
	261.004	0.94	0.831
8	261.207	0.94	0.833
	261.41	0.939	0.835
	261.613	0.938	0.837
	261.815	0.936	0.839
	262.018	0.935	0.84
	262.221	0.933	0.841
	262.424	0.931	0.841
	262.627	0.928	0.842
	262.829	0.926	0.842
	263.032	0.924	0.842
	263.235	0.921	0.842
	263.438	0.918	0.841
	263.641	0.914	0.84
	263.843	0.911	0.839
	264.046	0.907	0.838
	264.249	0.903	0.836
	264.452	0.898	0.834
	264.654	0.891	0.832
	264.857	0.886	0.828
	265.06	0.88	0.824
	265.263	0.875	0.821
	265.466	0.869	0.817
	265.669	0.863	0.813
	265.871	0.856	0.809
	266.074	0.85	0.804
	266.277	0.843	0.799
	266.48	0.836	0.795
	266.683	0.829	0.789
	266.885	0.822	0.784
	267.088	0.815	0.778
	267.291	0.808	0.773
	267.494	0.801	0.767
	267.697	0.793	0.761
	267.899	0.786	0.754
	268.102	0.778	0.748
	268.305	0.77	0.741
	268.508	0.762	0.735
	268.711	0.754	0.728
	268.913	0.746	0.721
	269.116	0.738	0.714
	269.319	0.729	0.706
	269.522	0.721	0.699
	269.725	0.713	0.692
	269.927	0.705	0.685
	270.13	0.696	0.677
	270.333	0.689	0.67
	270.536	0.68	0.663
	270.739	0.672	0.656
	270.941	0.664	0.648
	271.144	0.656	0.641
	271.347	0.648	0.633
	271.55	0.64	0.626
	271.753	0.632	0.619
	271.955	0.621	0.612
	272.158	0.613	0.602
	272.361	0.606	0.595
	272.564	0.599	0.589
	272.767	0.592	0.582
	272.969	0.585	0.576
	273.172	0.579	0.569
	273.375	0.572	0.563
	273.578	0.566	0.557
	273.781	0.56	0.551
	273.983	0.553	0.545
	274.186	0.548	0.539
	274.389	0.542	0.534
	274.592	0.536	0.528
	274.795	0.531	0.523
	274.997	0.525	0.518
	275.2	0.52	0.513
	275.403	0.515	0.508
	275.606	0.51	0.504
	275.809	0.506	0.499
	276.011	0.501	0.495
	276.214	0.497	0.491
	276.417	0.493	0.486
	276.62	0.489	0.482
	276.823	0.485	0.478
	277.025	0.481	0.475
	277.228	0.477	0.472
	277.431	0.473	0.468
	277.634	0.47	0.465
	277.837	0.467	0.462
	278.039	0.463	0.458
	278.242	0.46	0.455
	278.445	0.457	0.452
	278.648	0.454	0.449
	278.851	0.452	0.446
	279.053	0.448	0.443
	279.256	0.445	0.44
	279.459	0.442	0.437
	279.662	0.44	0.434
	279.865	0.437	0.432
	280.067	0.435	0.43
	280.27	0.433	0.428
	280.473	0.431	0.425
	280.676	0.428	0.423
	280.879	0.427	0.421
	281.081	0.424	0.419
	281.284	0.422	0.417
	281.487	0.421	0.415
	281.69	0.419	0.413
	281.893	0.417	0.411
	282.095	0.415	0.409
	282.298	0.413	0.407
	282.501	0.412	0.405
	282.704	0.41	0.404
	282.907	0.408	0.402
	283.109	0.406	0.4
	283.312	0.405	0.399
	283.515	0.403	0.397
	283.718	0.401	0.396
	283.921	0.4	0.394
	284.123	0.398	0.393
	284.326	0.397	0.392
	284.529	0.395	0.391
	284.732	0.394	0.389
	284.935	0.393	0.388
	285.137	0.391	0.386
	285.34	0.39	0.385
	285.543	0.389	0.384
	285.746	0.387	0.383
	285.949	0.386	0.382
	286.151	0.384	0.381
	286.354	0.383	0.379
	286.557	0.382	0.378
	286.76	0.38	0.377
	286.963	0.379	0.376
	287.165	0.378	0.374
	287.368	0.377	0.373
	287.571	0.375	0.372
	287.774	0.374	0.371
	287.977	0.373	0.37
	288.179	0.372	0.369
	288.382	0.371	0.368
	288.585	0.37	0.367
	288.788	0.368	0.367
	288.991	0.367	0.366
	289.193	0.366	0.366
	289.396	0.365	0.365
	289.599	0.364	0.364
	289.802	0.362	0.363
	290.005	0.361	0.362
9	290.207	0.36	0.36
	290.41	0.359	0.359
	290.613	0.358	0.358
	290.816	0.357	0.357
	291.019	0.356	0.356
	291.221	0.355	0.355
	291.424	0.353	0.354
	291.627	0.353	0.353
	291.83	0.352	0.352
	292.033	0.351	0.352
	292.235	0.35	0.351
	292.438	0.349	0.35
	292.641	0.348	0.35
	292.844	0.347	0.349
	293.047	0.346	0.348
	293.249	0.345	0.347
	293.452	0.344	0.346
	293.655	0.343	0.345
	293.858	0.342	0.344
	294.061	0.34	0.343
	294.263	0.34	0.342
	294.466	0.338	0.341
	294.669	0.338	0.341
	294.872	0.337	0.34
	295.075	0.336	0.339
	295.277	0.335	0.338
	295.48	0.334	0.337
	295.683	0.333	0.337
	295.886	0.332	0.336
	296.089	0.331	0.335
	296.291	0.33	0.334
	296.494	0.329	0.333
	296.697	0.328	0.332
	296.9	0.327	0.331
	297.103	0.326	0.331
	297.305	0.325	0.33
	297.508	0.325	0.329
	297.711	0.324	0.328
	297.914	0.323	0.328
	298.117	0.322	0.327
	298.319	0.321	0.326
	298.522	0.32	0.325
	298.725	0.319	0.324
	298.928	0.319	0.323
	299.131	0.317	0.322
	299.333	0.317	0.322
	299.536	0.316	0.321
	299.739	0.315	0.32
	299.942	0.314	0.319
	300.145	0.314	0.318
	300.347	0.313	0.318
	300.55	0.312	0.317
	300.753	0.311	0.317
	300.956	0.311	0.316
	301.159	0.31	0.316
	301.361	0.309	0.315
	301.564	0.308	0.314
	301.767	0.308	0.314
	301.97	0.307	0.313
	302.173	0.307	0.313
	302.375	0.306	0.312
	302.578	0.305	0.311
	302.781	0.305	0.311
	302.984	0.304	0.31
	303.187	0.303	0.31
	303.389	0.303	0.309
	303.592	0.302	0.308
	303.795	0.302	0.308
	303.998	0.301	0.307
	304.201	0.301	0.307
	304.403	0.301	0.307
	304.606	0.3	0.306
	304.809	0.299	0.305
	305.012	0.299	0.305
	305.215	0.299	0.305
	305.417	0.298	0.304
	305.62	0.298	0.304
	305.823	0.298	0.304
	306.026	0.297	0.304
	306.229	0.297	0.304
	306.431	0.296	0.304
	306.634	0.296	0.303
	306.837	0.296	0.303
	307.04	0.295	0.303
	307.243	0.295	0.302
	307.445	0.295	0.302
	307.648	0.295	0.302
	307.851	0.294	0.301
	308.054	0.294	0.301
	308.257	0.294	0.301
	308.459	0.293	0.301
	308.662	0.293	0.3
	308.865	0.293	0.3
	309.068	0.292	0.299
	309.271	0.292	0.299
	309.473	0.292	0.299
	309.676	0.291	0.298
	309.879	0.291	0.298
	310.082	0.29	0.298
	310.285	0.29	0.297
	310.487	0.29	0.297
	310.69	0.289	0.296
	310.893	0.289	0.296
	311.096	0.288	0.296
	311.299	0.288	0.296
	311.501	0.287	0.295
	311.704	0.287	0.295
	311.907	0.287	0.295
	312.11	0.286	0.294
	312.313	0.286	0.294
	312.515	0.285	0.293
	312.718	0.285	0.293
	312.921	0.284	0.293
	313.124	0.284	0.293
	313.327	0.283	0.292
	313.529	0.283	0.292
	313.732	0.283	0.291
	313.935	0.282	0.291
	314.138	0.281	0.29
	314.341	0.281	0.29
	314.543	0.281	0.29
	314.746	0.28	0.289
	314.949	0.28	0.289
	315.152	0.28	0.289
	315.355	0.279	0.288
	315.557	0.278	0.287
	315.76	0.278	0.287
	315.963	0.278	0.286
	316.166	0.277	0.286
	316.369	0.277	0.285
	316.571	0.277	0.285
	316.774	0.276	0.284
	316.977	0.276	0.284
	317.18	0.275	0.284
	317.383	0.275	0.283
	317.585	0.275	0.283
	317.788	0.275	0.282
	317.991	0.274	0.282
	318.194	0.274	0.281
	318.397	0.274	0.281
	318.599	0.274	0.28
	318.802	0.274	0.28
	319.005	0.274	0.28
10	319.208	0.274	0.279
	319.411	0.274	0.278
	319.613	0.274	0.278
	319.816	0.274	0.278
	320.019	0.274	0.278
	320.222	0.274	0.277
	320.425	0.274	0.277
	320.627	0.274	0.277
	320.83	0.275	0.276
	321.033	0.275	0.276
	321.236	0.275	0.276
	321.439	0.275	0.276
	321.641	0.276	0.276
	321.844	0.277	0.275
	322.047	0.277	0.275
	322.25	0.278	0.275
	322.453	0.279	0.275
	322.655	0.28	0.275
	322.858	0.281	0.276
	323.061	0.281	0.276
	323.264	0.283	0.276
	323.467	0.285	0.276
	323.669	0.286	0.277
	323.872	0.288	0.277
	324.075	0.29	0.278
	324.278	0.292	0.278
	324.481	0.294	0.279
	324.683	0.296	0.279
	324.886	0.298	0.28
	325.089	0.3	0.281
	325.292	0.303	0.281
	325.495	0.305	0.283
	325.697	0.308	0.284
	325.9	0.311	0.285
	326.103	0.314	0.286
	326.306	0.317	0.287
	326.509	0.32	0.289
	326.711	0.323	0.29
	326.914	0.326	0.292
	327.117	0.329	0.293
	327.32	0.332	0.295
	327.523	0.336	0.297
	327.725	0.339	0.299
	327.928	0.342	0.301
	328.131	0.346	0.303
	328.334	0.349	0.305
	328.537	0.352	0.307
	328.739	0.355	0.31
	328.942	0.358	0.312
	329.145	0.361	0.314
	329.348	0.364	0.316
	329.551	0.367	0.319
	329.753	0.37	0.321
	329.956	0.373	0.323
	330.159	0.375	0.326
	330.362	0.377	0.328
	330.565	0.381	0.33
	330.767	0.383	0.334
	330.97	0.385	0.336
	331.173	0.387	0.338
	331.376	0.388	0.34
	331.579	0.39	0.342
	331.781	0.391	0.344
	331.984	0.392	0.346
	332.187	0.393	0.347
	332.39	0.394	0.349
	332.593	0.395	0.351
	332.795	0.395	0.353
	332.998	0.396	0.354
	333.201	0.396	0.355
	333.404	0.396	0.357
	333.607	0.396	0.358
	333.809	0.396	0.359
	334.012	0.396	0.36
	334.215	0.395	0.361
	334.418	0.395	0.361
	334.621	0.394	0.362
	334.823	0.394	0.362
	335.026	0.392	0.362
	335.229	0.392	0.363
	335.432	0.391	0.363
	335.635	0.389	0.363
	335.837	0.388	0.362
	336.04	0.387	0.362
	336.243	0.385	0.362
	336.446	0.384	0.361
	336.649	0.382	0.361
	336.851	0.38	0.36
	337.054	0.379	0.359
	337.257	0.377	0.359
	337.46	0.375	0.358
	337.663	0.373	0.357
	337.865	0.37	0.356
	338.068	0.368	0.354
	338.271	0.366	0.352
	338.474	0.364	0.351
	338.677	0.362	0.35
	338.879	0.359	0.348
	339.082	0.357	0.346
	339.285	0.355	0.345
	339.488	0.353	0.343
	339.691	0.351	0.341
	339.893	0.349	0.34
	340.096	0.347	0.338
	340.299	0.344	0.336
	340.502	0.342	0.334
	340.705	0.34	0.332
	340.907	0.338	0.331
	341.11	0.336	0.329
	341.313	0.334	0.327
	341.516	0.332	0.325
	341.719	0.33	0.323
	341.921	0.328	0.321
	342.124	0.326	0.32
	342.327	0.325	0.318
	342.53	0.323	0.316
	342.733	0.321	0.314
	342.935	0.319	0.313
	343.138	0.318	0.311
	343.341	0.316	0.309
	343.544	0.315	0.308
	343.747	0.313	0.306
	343.949	0.312	0.305
	344.152	0.31	0.303
	344.355	0.309	0.302
	344.558	0.308	0.301
	344.761	0.307	0.299
	344.963	0.305	0.298
	345.166	0.304	0.296
	345.369	0.302	0.295
	345.572	0.301	0.293
	345.775	0.3	0.292
	345.977	0.299	0.292
	346.18	0.298	0.29
	346.383	0.297	0.289
	346.586	0.296	0.289
	346.789	0.295	0.288
	346.991	0.295	0.287
	347.194	0.293	0.286
	347.397	0.293	0.285
	347.6	0.292	0.284
	347.803	0.291	0.284
	348.005	0.29	0.283
11	348.208	0.289	0.282
	348.411	0.289	0.281
	348.614	0.288	0.281
	348.817	0.287	0.28
	349.019	0.286	0.28
	349.222	0.285	0.279
	349.425	0.284	0.278
	349.628	0.284	0.278
	349.831	0.283	0.277
	350.033	0.283	0.277
	350.236	0.282	0.276
	350.439	0.281	0.275
	350.642	0.281	0.275
	350.845	0.28	0.275
	351.047	0.279	0.274
	351.25	0.279	0.274
	351.453	0.278	0.273
	351.656	0.277	0.272
	351.859	0.277	0.272
	352.061	0.276	0.271
	352.264	0.275	0.271
	352.467	0.275	0.271
	352.67	0.274	0.27
	352.873	0.273	0.269
	353.075	0.272	0.268
	353.278	0.272	0.268
	353.481	0.271	0.267
	353.684	0.27	0.267
	353.887	0.269	0.266
	354.089	0.269	0.265
	354.292	0.268	0.265
	354.495	0.268	0.264
	354.698	0.267	0.264
	354.901	0.266	0.263
	355.103	0.266	0.263
	355.306	0.265	0.262
	355.509	0.265	0.262
	355.712	0.264	0.261
	355.915	0.263	0.26
	356.117	0.263	0.26
	356.32	0.262	0.259
	356.523	0.262	0.259
	356.726	0.261	0.258
	356.929	0.26	0.257
	357.131	0.26	0.257
	357.334	0.259	0.256
	357.537	0.259	0.256
	357.74	0.258	0.255
	357.943	0.258	0.255
	358.145	0.257	0.254
	358.348	0.257	0.254
	358.551	0.257	0.253
	358.754	0.257	0.253
	358.957	0.256	0.253
	359.159	0.256	0.252
	359.362	0.256	0.251
	359.565	0.255	0.251
	359.768	0.255	0.251
	359.971	0.254	0.25
	360.173	0.254	0.25
	360.376	0.254	0.249
	360.579	0.254	0.249
	360.782	0.254	0.249
	360.985	0.254	0.248
	361.187	0.253	0.248
	361.39	0.253	0.247
	361.593	0.253	0.247
	361.796	0.253	0.247
	361.999	0.253	0.247
	362.201	0.253	0.247
	362.404	0.253	0.246
	362.607	0.253	0.246
	362.81	0.253	0.246
	363.013	0.253	0.246
	363.215	0.253	0.246
	363.418	0.253	0.246
	363.621	0.253	0.246
	363.824	0.253	0.245
	364.027	0.253	0.245
	364.229	0.253	0.245
	364.432	0.253	0.245
	364.635	0.253	0.245
	364.838	0.253	0.245
	365.041	0.253	0.245
	365.243	0.254	0.245
	365.446	0.254	0.245
	365.649	0.254	0.245
	365.852	0.254	0.245
	366.055	0.254	0.245
	366.257	0.255	0.245
	366.46	0.255	0.245
	366.663	0.256	0.245
	366.866	0.256	0.245
	367.069	0.257	0.246
	367.272	0.258	0.246
	367.474	0.259	0.246
	367.677	0.259	0.246
	367.88	0.26	0.246
	368.083	0.261	0.246
	368.285	0.262	0.247
	368.488	0.264	0.247
	368.691	0.265	0.247
	368.894	0.266	0.247
	369.097	0.268	0.248
	369.299	0.27	0.249
	369.502	0.272	0.249
	369.705	0.274	0.249
	369.908	0.276	0.25
	370.111	0.278	0.251
	370.313	0.28	0.251
	370.516	0.283	0.252
	370.719	0.286	0.253
	370.922	0.289	0.254
	371.125	0.291	0.256
	371.328	0.294	0.257
	371.53	0.298	0.258
	371.733	0.301	0.259
	371.936	0.304	0.261
	372.139	0.307	0.263
	372.342	0.31	0.264
	372.544	0.314	0.266
	372.747	0.317	0.268
	372.95	0.321	0.27
	373.153	0.324	0.272
	373.355	0.328	0.274
	373.558	0.331	0.276
	373.761	0.334	0.279
	373.964	0.338	0.281
	374.167	0.341	0.284
	374.369	0.345	0.286
	374.572	0.348	0.29
	374.775	0.351	0.293
	374.978	0.354	0.296
	375.181	0.356	0.298
	375.384	0.359	0.301
	375.586	0.361	0.304
	375.789	0.363	0.306
	375.992	0.365	0.309
	376.195	0.367	0.311
	376.398	0.369	0.314
	376.6	0.37	0.316
	376.803	0.371	0.319
	377.006	0.373	0.321
12	377.209	0.374	0.323
	377.412	0.374	0.325
	377.614	0.375	0.327
	377.817	0.376	0.328
	378.02	0.376	0.33
	378.223	0.376	0.332
	378.425	0.376	0.333
	378.628	0.376	0.334
	378.831	0.376	0.335
	379.034	0.375	0.336
	379.237	0.375	0.337
	379.44	0.374	0.337
	379.642	0.374	0.338
	379.845	0.373	0.338
	380.048	0.372	0.338
	380.251	0.371	0.338
	380.454	0.37	0.338
	380.656	0.368	0.338
	380.859	0.367	0.338
	381.062	0.366	0.338
	381.265	0.364	0.337
	381.468	0.362	0.337
	381.67	0.361	0.336
	381.873	0.359	0.335
	382.076	0.357	0.334
	382.279	0.354	0.333
	382.482	0.352	0.331
	382.684	0.35	0.329
	382.887	0.348	0.328
	383.09	0.346	0.327
	383.293	0.344	0.325
	383.496	0.342	0.324
	383.698	0.34	0.322
	383.901	0.338	0.321
	384.104	0.336	0.319
	384.307	0.334	0.317
	384.51	0.332	0.316
	384.712	0.33	0.314
	384.915	0.328	0.313
	385.118	0.326	0.311
	385.321	0.325	0.309
	385.524	0.323	0.308
	385.726	0.321	0.306
	385.929	0.319	0.305
	386.132	0.318	0.303
	386.335	0.316	0.302
	386.538	0.314	0.3
	386.74	0.313	0.299
	386.943	0.311	0.298
	387.146	0.31	0.296
	387.349	0.309	0.295
	387.552	0.307	0.293
	387.754	0.306	0.292
	387.957	0.304	0.291
	388.16	0.303	0.29
	388.363	0.302	0.289
	388.566	0.301	0.287
	388.768	0.299	0.286
	388.971	0.298	0.285
	389.174	0.297	0.284
	389.377	0.295	0.283
	389.58	0.294	0.281
	389.782	0.293	0.281
	389.985	0.292	0.28
	390.188	0.291	0.278
	390.391	0.29	0.278
	390.594	0.289	0.277
	390.796	0.288	0.276
	390.999	0.287	0.275
	391.202	0.286	0.274
	391.405	0.285	0.274
	391.608	0.284	0.272
	391.81	0.283	0.272
	392.013	0.283	0.271
	392.216	0.282	0.27
	392.419	0.281	0.269
	392.622	0.28	0.269
	392.824	0.28	0.268
	393.027	0.279	0.267
	393.23	0.278	0.266
	393.433	0.277	0.266
	393.636	0.277	0.265
	393.838	0.276	0.264
	394.041	0.275	0.263
	394.244	0.275	0.263
	394.447	0.274	0.262
	394.65	0.274	0.262
	394.852	0.274	0.261
	395.055	0.273	0.26
	395.258	0.273	0.26
	395.461	0.272	0.259
	395.664	0.272	0.259
	395.866	0.272	0.258
	396.069	0.272	0.258
	396.272	0.271	0.257
	396.475	0.271	0.257
	396.678	0.271	0.256
	396.88	0.271	0.256
	397.083	0.271	0.256
	397.286	0.271	0.255
	397.489	0.271	0.255
	397.692	0.271	0.255
	397.894	0.272	0.255
	398.097	0.272	0.254
	398.3	0.272	0.254
	398.503	0.272	0.254
	398.706	0.273	0.254
	398.908	0.274	0.254
	399.111	0.274	0.254
	399.314	0.275	0.255
	399.517	0.275	0.255
	399.72	0.276	0.255
	399.922	0.277	0.255
	400.125	0.278	0.256
	400.328	0.28	0.256
	400.531	0.281	0.256
	400.734	0.282	0.257
	400.936	0.284	0.257
	401.139	0.285	0.258
	401.342	0.287	0.259
	401.545	0.289	0.26
	401.748	0.291	0.26
	401.95	0.293	0.262
	402.153	0.295	0.263
	402.356	0.298	0.264
	402.559	0.3	0.265
	402.762	0.303	0.266
	402.964	0.306	0.268
	403.167	0.308	0.269
	403.37	0.311	0.271
	403.573	0.314	0.272
	403.776	0.319	0.274
	403.978	0.323	0.277
	404.181	0.326	0.28
	404.384	0.329	0.282
	404.587	0.332	0.284
	404.79	0.336	0.287
	404.992	0.339	0.289
	405.195	0.342	0.292
	405.398	0.345	0.294
	405.601	0.349	0.297
	405.804	0.351	0.299
	406.006	0.354	0.302
13	406.209	0.357	0.305
	406.412	0.359	0.307
	406.615	0.362	0.31
	406.818	0.364	0.313
	407.02	0.366	0.315
	407.223	0.368	0.318
	407.426	0.37	0.32
	407.629	0.371	0.322
	407.832	0.373	0.325
	408.034	0.374	0.326
	408.237	0.375	0.328
	408.44	0.376	0.33
	408.643	0.376	0.332
	408.846	0.377	0.333
	409.048	0.377	0.334
	409.251	0.377	0.336
	409.454	0.377	0.337
	409.657	0.377	0.338
	409.86	0.377	0.339
	410.062	0.377	0.34
	410.265	0.376	0.34
	410.468	0.375	0.34
	410.671	0.374	0.341
	410.874	0.373	0.341
	411.076	0.372	0.341
	411.279	0.371	0.34
	411.482	0.369	0.34
	411.685	0.367	0.339
	411.888	0.365	0.338
	412.09	0.364	0.337
	412.293	0.362	0.336
	412.496	0.36	0.335
	412.699	0.358	0.334
	412.902	0.356	0.332
	413.104	0.354	0.331
	413.307	0.352	0.329
	413.51	0.35	0.328
	413.713	0.347	0.326
	413.916	0.346	0.324
	414.118	0.343	0.322
	414.321	0.341	0.321
	414.524	0.339	0.319
	414.727	0.337	0.317
	414.93	0.335	0.315
	415.132	0.334	0.314
	415.335	0.332	0.312
	415.538	0.33	0.31
	415.741	0.328	0.308
	415.944	0.326	0.307
	416.146	0.324	0.305
	416.349	0.323	0.304
	416.552	0.321	0.302
	416.755	0.319	0.301
	416.958	0.318	0.299
	417.16	0.316	0.298
	417.363	0.315	0.297
	417.566	0.313	0.295
	417.769	0.312	0.294
	417.972	0.31	0.293
	418.174	0.309	0.292
	418.377	0.308	0.29
	418.58	0.307	0.289
	418.783	0.305	0.289
	418.986	0.304	0.287
	419.188	0.303	0.286
	419.391	0.302	0.285
	419.594	0.302	0.284
	419.797	0.301	0.284
	420	0.3	0.283
	420.202	0.3	0.282
	420.405	0.299	0.281
	420.608	0.299	0.281
	420.811	0.299	0.281
	421.014	0.298	0.28
	421.216	0.298	0.28
	421.419	0.298	0.28
	421.622	0.298	0.279
	421.825	0.298	0.279
	422.028	0.298	0.279
	422.23	0.299	0.279
	422.433	0.299	0.279
	422.636	0.3	0.279
	422.839	0.301	0.28
	423.042	0.301	0.28
	423.244	0.302	0.28
	423.447	0.303	0.281
	423.65	0.304	0.281
	423.853	0.306	0.282
	424.056	0.307	0.283
	424.258	0.309	0.283
	424.461	0.31	0.284
	424.664	0.312	0.285
	424.867	0.314	0.286
	425.07	0.316	0.287
	425.272	0.319	0.289
	425.475	0.321	0.29
	425.678	0.323	0.291
	425.881	0.327	0.293
	426.084	0.329	0.295
	426.286	0.332	0.297
	426.489	0.335	0.299
	426.692	0.337	0.301
	426.895	0.34	0.303
	427.098	0.343	0.305
	427.3	0.346	0.307
	427.503	0.348	0.309
	427.706	0.35	0.311
	427.909	0.353	0.313
	428.112	0.355	0.316
	428.314	0.358	0.318
	428.517	0.36	0.32
	428.72	0.362	0.322
	428.923	0.364	0.324
	429.126	0.365	0.326
	429.328	0.367	0.328
	429.531	0.368	0.329
	429.734	0.369	0.331
	429.937	0.37	0.332
	430.14	0.37	0.334
	430.342	0.371	0.335
	430.545	0.371	0.336
	430.748	0.371	0.337
	430.951	0.371	0.337
	431.154	0.371	0.338
	431.356	0.37	0.338
	431.559	0.37	0.338
	431.762	0.369	0.338
	431.965	0.368	0.338
	432.168	0.367	0.338
	432.37	0.366	0.338
	432.573	0.364	0.337
	432.776	0.363	0.337
	432.979	0.362	0.336
	433.182	0.359	0.335
	433.384	0.358	0.333
	433.587	0.356	0.332
	433.79	0.354	0.331
	433.993	0.352	0.33
	434.196	0.35	0.328
	434.398	0.349	0.327
	434.601	0.347	0.326
	434.804	0.345	0.324
	435.007	0.343	0.323
14	435.21	0.341	0.321
	435.412	0.339	0.319
	435.615	0.337	0.318
	435.818	0.336	0.317
	436.021	0.334	0.315
	436.224	0.333	0.314
	436.426	0.331	0.313
	436.629	0.33	0.311
	436.832	0.329	0.31
	437.035	0.328	0.309
	437.238	0.326	0.308
	437.44	0.325	0.307
	437.643	0.325	0.306
	437.846	0.324	0.305
	438.049	0.323	0.304
	438.252	0.322	0.303
	438.454	0.322	0.303
	438.657	0.321	0.302
	438.86	0.321	0.301
	439.063	0.32	0.301
	439.266	0.32	0.3
	439.468	0.32	0.3
	439.671	0.32	0.299
	439.874	0.32	0.299
	440.077	0.32	0.299
	440.28	0.32	0.299
	440.482	0.321	0.299
	440.685	0.322	0.299
	440.888	0.322	0.299
	441.091	0.323	0.299
	441.294	0.324	0.3
	441.496	0.325	0.3
	441.699	0.326	0.301
	441.902	0.328	0.301
	442.105	0.329	0.302
	442.308	0.33	0.303
	442.51	0.332	0.304
	442.713	0.333	0.304
	442.916	0.335	0.305
	443.119	0.336	0.307
	443.322	0.338	0.308
	443.524	0.339	0.308
	443.727	0.341	0.31
	443.93	0.343	0.311
	444.133	0.344	0.312
	444.336	0.346	0.313
	444.538	0.347	0.315
	444.741	0.349	0.316
	444.944	0.35	0.317
	445.147	0.351	0.318
	445.35	0.352	0.319
	445.552	0.353	0.32
	445.755	0.355	0.322
	445.958	0.355	0.323
	446.161	0.356	0.324
	446.364	0.357	0.325
	446.566	0.357	0.326
	446.769	0.358	0.326
	446.972	0.358	0.327
	447.175	0.358	0.328
	447.378	0.358	0.328
	447.58	0.358	0.329
	447.783	0.357	0.329
	447.986	0.357	0.329
	448.189	0.356	0.329
	448.392	0.355	0.329
	448.594	0.354	0.329
	448.797	0.353	0.329
	449	0.352	0.328
	449.203	0.351	0.328
	449.406	0.35	0.327
	449.608	0.349	0.326
	449.811	0.348	0.325
	450.014	0.346	0.325
	450.217	0.345	0.324
	450.42	0.344	0.323
	450.622	0.343	0.322
	450.825	0.341	0.32
	451.028	0.34	0.319
	451.231	0.339	0.319
	451.434	0.338	0.317
	451.636	0.337	0.316
	451.839	0.335	0.315
	452.042	0.334	0.314
	452.245	0.333	0.313
	452.448	0.332	0.312
	452.65	0.331	0.311
	452.853	0.331	0.31
	453.056	0.33	0.309
	453.259	0.329	0.308
	453.462	0.329	0.308
	453.664	0.328	0.307
	453.867	0.328	0.307
	454.07	0.328	0.306
	454.273	0.328	0.305
	454.476	0.328	0.305
	454.678	0.328	0.305
	454.881	0.328	0.304
	455.084	0.328	0.304
	455.287	0.328	0.304
	455.49	0.329	0.304
	455.692	0.329	0.304
	455.895	0.33	0.304
	456.098	0.33	0.304
	456.301	0.331	0.304
	456.504	0.331	0.304
	456.706	0.332	0.305
	456.909	0.333	0.305
	457.112	0.333	0.305
	457.315	0.334	0.306
	457.518	0.334	0.306
	457.72	0.335	0.307
	457.923	0.335	0.307
	458.126	0.336	0.307
	458.329	0.337	0.308
	458.532	0.337	0.308
	458.734	0.337	0.309
	458.937	0.338	0.309
	459.14	0.338	0.31
	459.343	0.338	0.31
	459.546	0.338	0.31
	459.748	0.338	0.31
	459.951	0.338	0.311
	460.154	0.338	0.311
	460.357	0.338	0.311
	460.56	0.337	0.311
	460.762	0.337	0.311
	460.965	0.337	0.311
	461.168	0.336	0.311
	461.371	0.335	0.311
	461.574	0.335	0.311
	461.776	0.334	0.311
	461.979	0.333	0.31
	462.182	0.332	0.31
	462.385	0.331	0.31
	462.588	0.33	0.309
	462.79	0.329	0.309
	462.993	0.329	0.308
	463.196	0.328	0.308
	463.399	0.327	0.307
	463.602	0.326	0.307
	463.804	0.326	0.306
	464.007	0.325	0.305
15	464.21	0.324	0.305
	464.413	0.323	0.304
	464.616	0.323	0.303
	464.818	0.322	0.303
	465.021	0.322	0.302
	465.224	0.321	0.302
	465.427	0.321	0.301
	465.63	0.32	0.301
	465.832	0.32	0.3
	466.035	0.32	0.3
	466.238	0.32	0.299
	466.441	0.319	0.299
	466.644	0.319	0.298
	466.846	0.319	0.298
	467.049	0.319	0.298
	467.252	0.319	0.298
	467.455	0.319	0.297
	467.658	0.319	0.297
	467.86	0.319	0.297
	468.063	0.319	0.296
	468.266	0.319	0.296
	468.469	0.319	0.296
	468.672	0.319	0.296
	468.874	0.319	0.296
	469.077	0.319	0.296
	469.28	0.319	0.296
	469.483	0.319	0.296
	469.686	0.318	0.296
	469.888	0.318	0.296
	470.091	0.318	0.296
	470.294	0.317	0.296
	470.497	0.317	0.296
	470.7	0.317	0.296
	470.902	0.316	0.296
	471.105	0.316	0.296
	471.308	0.316	0.296
	471.511	0.315	0.296
	471.714	0.315	0.295
	471.916	0.314	0.295
	472.119	0.314	0.295
	472.322	0.313	0.295
	472.525	0.313	0.295
	472.728	0.312	0.295
	472.93	0.311	0.295
	473.133	0.311	0.294
	473.336	0.31	0.294
	473.539	0.31	0.294
	473.742	0.309	0.293
	473.944	0.308	0.293
	474.147	0.308	0.293
	474.35	0.307	0.292
	474.553	0.307	0.292
	474.756	0.306	0.292
	474.958	0.305	0.291
	475.161	0.305	0.29
	475.364	0.304	0.29
	475.567	0.304	0.29
	475.77	0.303	0.289
	475.972	0.302	0.289
	476.175	0.302	0.288
	476.378	0.301	0.288
	476.581	0.301	0.287
	476.784	0.3	0.287
	476.986	0.3	0.287
	477.189	0.299	0.286
	477.392	0.299	0.286
	477.595	0.298	0.286
	477.798	0.298	0.285
	478	0.298	0.284
	478.203	0.297	0.284
	478.406	0.297	0.284
	478.609	0.296	0.284
	478.812	0.296	0.283
	479.014	0.296	0.283
	479.217	0.295	0.283
	479.42	0.295	0.283
	479.623	0.295	0.283
	479.826	0.294	0.282
	480.028	0.293	0.282
	480.231	0.293	0.281
	480.434	0.293	0.281
	480.637	0.292	0.281
	480.84	0.292	0.281
	481.042	0.291	0.281
	481.245	0.291	0.281
	481.448	0.29	0.28
	481.651	0.29	0.28
	481.854	0.289	0.28
	482.056	0.289	0.28
	482.259	0.288	0.28
	482.462	0.287	0.279
	482.665	0.287	0.279
	482.868	0.286	0.279
	483.07	0.286	0.278
	483.273	0.285	0.278
	483.476	0.284	0.278
	483.679	0.284	0.278
	483.882	0.283	0.278
	484.084	0.283	0.277
	484.287	0.282	0.277
	484.49	0.281	0.277
	484.693	0.28	0.277
	484.896	0.28	0.276
	485.098	0.279	0.275
	485.301	0.278	0.275
	485.504	0.278	0.275
	485.707	0.277	0.275
	485.91	0.277	0.274
	486.113	0.276	0.274
	486.315	0.276	0.274
	486.518	0.275	0.273
	486.721	0.274	0.273
	486.924	0.274	0.272
	487.126	0.273	0.272
	487.329	0.273	0.272
	487.532	0.272	0.271
	487.735	0.272	0.271
	487.938	0.271	0.271
	488.14	0.271	0.27
	488.343	0.27	0.27
	488.546	0.269	0.269
	488.749	0.269	0.269
	488.952	0.268	0.269
	489.154	0.268	0.268
	489.357	0.267	0.268
	489.56	0.266	0.268
	489.763	0.266	0.268
	489.966	0.265	0.267
	490.169	0.265	0.267
	490.371	0.264	0.266
	490.574	0.264	0.266
	490.777	0.263	0.266
	490.98	0.263	0.266
	491.183	0.262	0.265
	491.385	0.262	0.265
	491.588	0.261	0.265
	491.791	0.26	0.265
[truncated: 6 more rows]
