# Supplementary material for: 5'-UTR SNP of FGF13 causes translational defect and intellectual disability
Source: eLife. 2021 Jun 29;10:e63021. doi: 10.7554/eLife.63021 (PMC8241442; doi:10.7554/eLife.63021)
Supplement: Figure 4—source data 1. [file elife-63021-fig4-data1.xlsx]

## Sheet: Figure 4A
Figure 4A
Polysome profiling, overall mRNA levels by UV absorption profiles (254 nm)
		OD 254 nm
Fraction #	Measure time (s)	WT	Mut
2	87.204	1.031	0.99
	87.407	1.031	0.982
	87.61	1.031	0.973
	87.813	1.031	0.966
	88.015	1.031	0.958
	88.218	1.031	0.95
	88.421	1.031	0.943
	88.624	1.031	0.936
	88.827	1.031	0.925
	89.029	1.031	0.919
	89.232	1.031	0.912
	89.435	1.031	0.906
	89.638	1.031	0.899
	89.841	1.031	0.893
	90.043	1.031	0.886
	90.246	1.031	0.88
	90.449	1.031	0.874
	90.652	1.031	0.868
	90.855	1.031	0.862
	91.057	1.031	0.856
	91.26	1.031	0.85
	91.463	1.031	0.844
	91.666	1.031	0.838
	91.869	1.031	0.832
	92.071	1.031	0.827
	92.274	1.031	0.821
	92.477	1.031	0.816
	92.68	1.031	0.81
	92.883	1.023	0.805
	93.085	1.006	0.8
	93.288	0.989	0.795
	93.491	0.973	0.789
	93.694	0.958	0.784
	93.897	0.943	0.779
	94.099	0.93	0.774
	94.302	0.918	0.768
	94.505	0.907	0.763
	94.708	0.896	0.759
	94.911	0.886	0.754
	95.113	0.877	0.75
	95.316	0.868	0.746
	95.519	0.859	0.742
	95.722	0.851	0.738
	95.925	0.843	0.731
	96.127	0.836	0.728
	96.33	0.828	0.723
	96.533	0.818	0.72
	96.736	0.811	0.716
	96.939	0.804	0.713
	97.141	0.798	0.709
	97.344	0.791	0.705
	97.547	0.784	0.702
	97.75	0.778	0.698
	97.953	0.772	0.694
	98.155	0.765	0.69
	98.358	0.759	0.686
	98.561	0.753	0.683
	98.764	0.747	0.679
	98.967	0.742	0.675
	99.169	0.736	0.672
	99.372	0.731	0.669
	99.575	0.726	0.666
	99.778	0.72	0.663
	99.981	0.716	0.66
	100.183	0.711	0.657
	100.386	0.706	0.654
	100.589	0.701	0.651
	100.792	0.696	0.648
	100.995	0.692	0.645
	101.197	0.687	0.643
	101.4	0.683	0.64
	101.603	0.678	0.638
	101.806	0.674	0.635
	102.009	0.67	0.632
	102.211	0.666	0.63
	102.414	0.662	0.627
	102.617	0.658	0.624
	102.82	0.654	0.621
	103.023	0.65	0.618
	103.225	0.646	0.616
	103.428	0.643	0.613
	103.631	0.639	0.611
	103.834	0.634	0.609
	104.037	0.631	0.608
	104.239	0.627	0.606
	104.442	0.624	0.604
	104.645	0.621	0.602
	104.848	0.618	0.599
	105.051	0.615	0.597
	105.253	0.612	0.594
	105.456	0.609	0.591
	105.659	0.606	0.589
	105.862	0.603	0.587
	106.065	0.6	0.585
	106.267	0.598	0.582
	106.47	0.596	0.58
	106.673	0.595	0.578
	106.876	0.595	0.576
	107.079	0.594	0.575
	107.281	0.593	0.573
	107.484	0.591	0.571
	107.687	0.588	0.569
	107.89	0.585	0.567
	108.093	0.582	0.565
	108.295	0.579	0.564
	108.498	0.576	0.562
	108.701	0.573	0.561
	108.904	0.57	0.559
	109.107	0.567	0.558
	109.309	0.565	0.557
	109.512	0.562	0.555
	109.715	0.56	0.554
	109.918	0.557	0.553
	110.121	0.555	0.552
	110.323	0.553	0.55
	110.526	0.551	0.548
	110.729	0.549	0.547
	110.932	0.546	0.545
	111.135	0.544	0.543
	111.337	0.542	0.542
	111.54	0.541	0.541
	111.743	0.539	0.54
	111.946	0.538	0.539
	112.149	0.537	0.537
	112.351	0.535	0.536
	112.554	0.534	0.534
	112.757	0.533	0.533
	112.96	0.531	0.531
	113.163	0.529	0.53
	113.365	0.528	0.529
	113.568	0.526	0.528
	113.771	0.524	0.527
	113.974	0.522	0.526
	114.177	0.52	0.525
	114.379	0.519	0.524
	114.582	0.517	0.524
	114.785	0.515	0.522
	114.988	0.514	0.521
	115.191	0.512	0.52
	115.393	0.511	0.519
	115.596	0.509	0.517
	115.799	0.508	0.516
	116.002	0.506	0.515
3	116.205	0.505	0.513
	116.407	0.504	0.5115
	116.61	0.503	0.5095
	116.813	0.502	0.5085
	117.016	0.501	0.506
	117.219	0.501	0.5045
	117.421	0.501	0.5025
	117.624	0.5	0.5005
	117.827	0.5	0.499
	118.03	0.499	0.4975
	118.233	0.497	0.4955
	118.435	0.496	0.494
	118.638	0.494	0.4935
	118.841	0.492	0.4935
	119.044	0.491	0.494
	119.247	0.49	0.494
	119.449	0.488	0.4935
	119.652	0.488	0.492
	119.855	0.487	0.491
	120.058	0.487	0.4895
	120.261	0.486	0.4875
	120.463	0.485	0.4865
	120.666	0.484	0.4845
	120.869	0.483	0.483
	121.072	0.481	0.4815
	121.275	0.48	0.4795
	121.477	0.478	0.478
	121.68	0.477	0.478
	121.883	0.475	0.478
	122.086	0.474	0.477
	122.289	0.473	0.476
	122.491	0.472	0.476
	122.694	0.47	0.475
	122.897	0.47	0.474
	123.1	0.469	0.473
	123.303	0.468	0.472
	123.505	0.467	0.472
	123.708	0.466	0.471
	123.911	0.465	0.4705
	124.114	0.464	0.4695
	124.317	0.464	0.469
	124.519	0.463	0.469
	124.722	0.462	0.469
	124.925	0.461	0.469
	125.128	0.461	0.469
	125.331	0.46	0.4695
	125.533	0.46	0.4705
	125.736	0.459	0.4715
	125.939	0.458	0.472
	126.142	0.458	0.4725
	126.345	0.457	0.473
	126.547	0.456	0.4745
	126.75	0.455	0.4755
	126.953	0.455	0.4755
	127.156	0.454	0.475
	127.359	0.453	0.476
	127.561	0.453	0.477
	127.764	0.452	0.478
	127.967	0.452	0.478
	128.17	0.451	0.477
	128.373	0.451	0.476
	128.575	0.451	0.476
	128.778	0.45	0.4755
	128.981	0.449	0.475
	129.184	0.448	0.476
	129.387	0.448	0.476
	129.589	0.447	0.476
	129.792	0.446	0.4755
	129.995	0.446	0.475
	130.198	0.446	0.475
	130.401	0.446	0.475
	130.603	0.446	0.475
	130.806	0.445	0.475
	131.009	0.445	0.4755
	131.212	0.444	0.4765
	131.415	0.444	0.477
	131.617	0.444	0.476
	131.82	0.444	0.475
	132.023	0.444	0.475
	132.226	0.443	0.475
	132.429	0.443	0.4745
	132.631	0.442	0.4735
	132.834	0.44	0.473
	133.037	0.439	0.4725
	133.24	0.438	0.4715
	133.443	0.437	0.4695
	133.645	0.437	0.469
	133.848	0.436	0.469
	134.051	0.435	0.4685
	134.254	0.434	0.467
	134.457	0.434	0.4655
	134.659	0.433	0.4635
	134.862	0.432	0.4615
	135.065	0.432	0.4605
	135.268	0.432	0.459
	135.471	0.433	0.458
	135.673	0.433	0.457
	135.876	0.433	0.4555
	136.079	0.432	0.4535
	136.282	0.431	0.4525
	136.485	0.43	0.451
	136.687	0.43	0.4505
	136.89	0.429	0.449
	137.093	0.428	0.448
	137.296	0.427	0.4465
	137.499	0.426	0.446
	137.701	0.425	0.445
	137.904	0.425	0.4435
	138.107	0.424	0.443
	138.31	0.423	0.442
	138.513	0.423	0.4415
	138.715	0.422	0.4395
	138.918	0.422	0.4385
	139.121	0.422	0.437
	139.324	0.422	0.436
	139.527	0.421	0.435
	139.729	0.421	0.434
	139.932	0.421	0.433
	140.135	0.421	0.432
	140.338	0.422	0.431
	140.541	0.422	0.431
	140.743	0.421	0.43
	140.946	0.421	0.43
	141.149	0.42	0.43
	141.352	0.42	0.429
	141.555	0.419	0.428
	141.757	0.419	0.427
	141.96	0.418	0.426
	142.163	0.418	0.425
	142.366	0.418	0.425
	142.569	0.417	0.424
	142.772	0.417	0.4235
	142.974	0.416	0.4225
	143.177	0.416	0.422
	143.38	0.416	0.422
	143.583	0.415	0.421
	143.785	0.415	0.421
	143.988	0.415	0.42
	144.191	0.415	0.419
	144.394	0.415	0.419
	144.597	0.416	0.4185
	144.8	0.416	0.418
	145.002	0.416	0.418
4	145.205	0.416	0.418
	145.408	0.416	0.418
	145.611	0.415	0.417
	145.814	0.415	0.417
	146.016	0.415	0.417
	146.219	0.415	0.417
	146.422	0.415	0.416
	146.625	0.415	0.416
	146.828	0.415	0.416
	147.03	0.415	0.416
	147.233	0.415	0.416
	147.436	0.416	0.416
	147.639	0.416	0.416
	147.842	0.417	0.415
	148.044	0.418	0.415
	148.247	0.418	0.415
	148.45	0.418	0.415
	148.653	0.418	0.414
	148.856	0.418	0.414
	149.058	0.418	0.414
	149.261	0.418	0.413
	149.464	0.418	0.413
	149.667	0.419	0.413
	149.87	0.419	0.413
	150.072	0.419	0.412
	150.275	0.419	0.412
	150.478	0.419	0.412
	150.681	0.419	0.412
	150.884	0.42	0.412
	151.086	0.421	0.412
	151.289	0.421	0.412
	151.492	0.421	0.412
	151.695	0.422	0.412
	151.898	0.422	0.412
	152.1	0.422	0.412
	152.303	0.422	0.412
	152.506	0.422	0.412
	152.709	0.422	0.412
	152.912	0.423	0.412
	153.114	0.423	0.411
	153.317	0.423	0.411
	153.52	0.422	0.411
	153.723	0.422	0.41
	153.926	0.422	0.41
	154.128	0.422	0.41
	154.331	0.422	0.41
	154.534	0.422	0.41
	154.737	0.423	0.41
	154.94	0.424	0.409
	155.142	0.424	0.409
	155.345	0.425	0.409
	155.548	0.425	0.409
	155.751	0.425	0.409
	155.954	0.424	0.409
	156.156	0.424	0.409
	156.359	0.424	0.409
	156.562	0.423	0.409
	156.765	0.423	0.409
	156.968	0.422	0.409
	157.17	0.422	0.409
	157.373	0.421	0.409
	157.576	0.421	0.409
	157.779	0.421	0.408
	157.982	0.421	0.408
	158.184	0.42	0.408
	158.387	0.42	0.408
	158.59	0.42	0.408
	158.793	0.42	0.408
	158.996	0.419	0.408
	159.198	0.419	0.407
	159.401	0.419	0.407
	159.604	0.419	0.407
	159.807	0.419	0.407
	160.01	0.418	0.407
	160.212	0.418	0.407
	160.415	0.418	0.407
	160.618	0.417	0.407
	160.821	0.417	0.407
	161.024	0.417	0.407
	161.226	0.416	0.407
	161.429	0.416	0.407
	161.632	0.415	0.407
	161.835	0.415	0.406
	162.038	0.415	0.406
	162.24	0.414	0.406
	162.443	0.413	0.406
	162.646	0.412	0.406
	162.849	0.412	0.406
	163.052	0.412	0.406
	163.254	0.411	0.406
	163.457	0.41	0.406
	163.66	0.41	0.406
	163.863	0.409	0.407
	164.066	0.409	0.407
	164.268	0.409	0.407
	164.471	0.408	0.407
	164.674	0.408	0.407
	164.877	0.407	0.407
	165.08	0.407	0.407
	165.282	0.407	0.407
	165.485	0.407	0.407
	165.688	0.406	0.407
	165.891	0.406	0.407
	166.094	0.406	0.407
	166.296	0.405	0.407
	166.499	0.405	0.407
	166.702	0.404	0.407
	166.905	0.404	0.407
	167.108	0.403	0.407
	167.31	0.403	0.407
	167.513	0.402	0.407
	167.716	0.401	0.407
	167.919	0.401	0.407
	168.122	0.4	0.407
	168.324	0.4	0.408
	168.527	0.4	0.408
	168.73	0.399	0.408
	168.933	0.399	0.408
	169.136	0.398	0.408
	169.338	0.398	0.408
	169.541	0.397	0.408
	169.744	0.397	0.408
	169.947	0.396	0.408
	170.15	0.395	0.408
	170.352	0.395	0.409
	170.555	0.395	0.409
	170.758	0.394	0.409
	170.961	0.394	0.409
	171.164	0.393	0.409
	171.366	0.393	0.41
	171.569	0.392	0.41
	171.772	0.392	0.41
	171.975	0.391	0.41
	172.178	0.391	0.41
	172.38	0.391	0.41
	172.583	0.39	0.41
	172.786	0.39	0.41
	172.989	0.39	0.41
	173.192	0.389	0.41
	173.394	0.389	0.41
	173.597	0.389	0.41
	173.8	0.389	0.41
	174.003	0.388	0.411
5	174.206	0.388	0.411
	174.408	0.388	0.411
	174.611	0.388	0.411
	174.814	0.388	0.411
	175.017	0.387	0.412
	175.22	0.387	0.412
	175.422	0.387	0.412
	175.625	0.387	0.412
	175.828	0.386	0.412
	176.031	0.386	0.413
	176.234	0.386	0.413
	176.436	0.385	0.413
	176.639	0.385	0.413
	176.842	0.385	0.413
	177.045	0.385	0.413
	177.248	0.385	0.413
	177.45	0.385	0.413
	177.653	0.385	0.413
	177.856	0.385	0.413
	178.059	0.385	0.413
	178.262	0.385	0.414
	178.464	0.385	0.414
	178.667	0.385	0.414
	178.87	0.385	0.414
	179.073	0.385	0.414
	179.276	0.384	0.415
	179.478	0.384	0.415
	179.681	0.383	0.415
	179.884	0.383	0.415
	180.087	0.383	0.415
	180.29	0.382	0.415
	180.492	0.382	0.415
	180.695	0.381	0.416
	180.898	0.381	0.416
	181.101	0.381	0.416
	181.304	0.381	0.416
	181.506	0.381	0.416
	181.709	0.382	0.416
	181.912	0.382	0.416
	182.115	0.382	0.417
	182.318	0.381	0.417
	182.52	0.381	0.417
	182.723	0.381	0.417
	182.926	0.38	0.417
	183.129	0.38	0.417
	183.332	0.38	0.417
	183.534	0.38	0.417
	183.737	0.38	0.418
	183.94	0.379	0.418
	184.143	0.379	0.418
	184.346	0.379	0.418
	184.548	0.379	0.418
	184.751	0.378	0.418
	184.954	0.378	0.418
	185.157	0.378	0.418
	185.36	0.377	0.419
	185.562	0.377	0.419
	185.765	0.377	0.419
	185.968	0.377	0.419
	186.171	0.377	0.419
	186.374	0.377	0.419
	186.576	0.377	0.42
	186.779	0.377	0.42
	186.982	0.377	0.42
	187.185	0.377	0.42
	187.388	0.377	0.42
	187.59	0.376	0.421
	187.793	0.376	0.421
	187.996	0.376	0.421
	188.199	0.376	0.421
	188.402	0.376	0.421
	188.604	0.376	0.421
	188.807	0.376	0.421
	189.01	0.376	0.421
	189.213	0.376	0.421
	189.416	0.376	0.421
	189.618	0.376	0.421
	189.821	0.376	0.422
	190.024	0.376	0.422
	190.227	0.376	0.422
	190.43	0.376	0.422
	190.632	0.376	0.422
	190.835	0.376	0.422
	191.038	0.376	0.422
	191.241	0.375	0.423
	191.444	0.375	0.423
	191.646	0.375	0.423
	191.849	0.375	0.423
	192.052	0.375	0.424
	192.255	0.375	0.424
	192.458	0.375	0.424
	192.66	0.375	0.424
	192.863	0.374	0.424
	193.066	0.374	0.424
	193.269	0.374	0.424
	193.472	0.374	0.424
	193.674	0.373	0.424
	193.877	0.373	0.425
	194.08	0.373	0.425
	194.283	0.373	0.425
	194.486	0.373	0.425
	194.688	0.373	0.425
	194.891	0.373	0.426
	195.094	0.373	0.426
	195.297	0.373	0.426
	195.5	0.373	0.427
	195.702	0.373	0.427
	195.905	0.372	0.427
	196.108	0.372	0.427
	196.311	0.372	0.427
	196.514	0.372	0.427
	196.716	0.372	0.427
	196.919	0.372	0.427
	197.122	0.372	0.427
	197.325	0.372	0.427
	197.528	0.372	0.427
	197.73	0.372	0.427
	197.933	0.373	0.427
	198.136	0.373	0.427
	198.339	0.373	0.427
	198.542	0.373	0.428
	198.744	0.373	0.428
	198.947	0.373	0.428
	199.15	0.373	0.429
	199.353	0.373	0.429
	199.556	0.373	0.429
	199.758	0.373	0.43
	199.961	0.373	0.43
	200.164	0.373	0.431
	200.367	0.373	0.431
	200.57	0.373	0.432
	200.772	0.373	0.432
	200.975	0.373	0.433
	201.178	0.374	0.434
	201.381	0.374	0.434
	201.584	0.374	0.435
	201.786	0.375	0.436
	201.989	0.376	0.437
	202.192	0.376	0.437
	202.395	0.376	0.439
	202.598	0.377	0.44
	202.8	0.378	0.441
	203.003	0.379	0.442
6	203.206	0.379	0.443
	203.409	0.38	0.445
	203.612	0.381	0.446
	203.814	0.382	0.447
	204.017	0.383	0.448
	204.22	0.385	0.45
	204.423	0.386	0.451
	204.626	0.387	0.452
	204.828	0.388	0.454
	205.031	0.389	0.455
	205.234	0.389	0.456
	205.437	0.391	0.457
	205.64	0.391	0.458
	205.842	0.392	0.459
	206.045	0.394	0.46
	206.248	0.395	0.461
	206.451	0.396	0.462
	206.654	0.397	0.464
	206.856	0.398	0.465
	207.059	0.4	0.466
	207.262	0.401	0.467
	207.465	0.403	0.468
	207.668	0.404	0.469
	207.87	0.406	0.47
	208.073	0.407	0.471
	208.276	0.408	0.472
	208.479	0.409	0.472
	208.682	0.411	0.473
	208.884	0.412	0.473
	209.087	0.413	0.474
	209.29	0.414	0.474
	209.493	0.415	0.475
	209.696	0.417	0.475
	209.898	0.418	0.475
	210.101	0.419	0.475
	210.304	0.42	0.475
	210.507	0.421	0.476
	210.71	0.422	0.476
	210.912	0.423	0.476
	211.115	0.424	0.476
	211.318	0.425	0.476
	211.521	0.426	0.476
	211.724	0.427	0.475
	211.926	0.427	0.475
	212.129	0.428	0.475
	212.332	0.428	0.475
	212.535	0.429	0.474
	212.738	0.429	0.473
	212.94	0.43	0.473
	213.143	0.43	0.472
	213.346	0.43	0.471
	213.549	0.431	0.47
	213.752	0.431	0.469
	213.954	0.431	0.468
	214.157	0.431	0.467
	214.36	0.431	0.466
	214.563	0.431	0.465
	214.766	0.43	0.464
	214.968	0.43	0.463
	215.171	0.43	0.461
	215.374	0.43	0.461
	215.577	0.429	0.459
	215.78	0.429	0.458
	215.982	0.428	0.457
	216.185	0.428	0.456
	216.388	0.427	0.455
	216.591	0.427	0.454
	216.794	0.427	0.453
	216.996	0.426	0.451
	217.199	0.425	0.45
	217.402	0.425	0.449
	217.605	0.424	0.448
	217.808	0.423	0.447
	218.01	0.422	0.446
	218.213	0.421	0.445
	218.416	0.42	0.443
	218.619	0.419	0.442
	218.822	0.418	0.441
	219.024	0.417	0.44
	219.227	0.416	0.439
	219.43	0.415	0.438
	219.633	0.414	0.437
	219.836	0.413	0.436
	220.038	0.412	0.434
	220.241	0.411	0.434
	220.444	0.41	0.433
	220.647	0.409	0.431
	220.85	0.408	0.431
	221.052	0.407	0.429
	221.255	0.405	0.428
	221.458	0.404	0.428
	221.661	0.403	0.427
	221.864	0.402	0.426
	222.066	0.401	0.425
	222.269	0.4	0.424
	222.472	0.399	0.424
	222.675	0.398	0.423
	222.878	0.397	0.422
	223.08	0.396	0.422
	223.283	0.395	0.421
	223.486	0.394	0.421
	223.689	0.393	0.42
	223.892	0.392	0.419
	224.094	0.392	0.419
	224.297	0.391	0.418
	224.5	0.39	0.418
	224.703	0.389	0.417
	224.906	0.389	0.417
	225.108	0.388	0.416
	225.311	0.387	0.416
	225.514	0.387	0.415
	225.717	0.386	0.415
	225.92	0.385	0.415
	226.122	0.385	0.414
	226.325	0.384	0.414
	226.528	0.383	0.414
	226.731	0.383	0.413
	226.934	0.382	0.413
	227.136	0.382	0.413
	227.339	0.381	0.412
	227.542	0.381	0.412
	227.745	0.38	0.412
	227.948	0.38	0.412
	228.15	0.38	0.411
	228.353	0.379	0.411
	228.556	0.379	0.411
	228.759	0.379	0.411
	228.962	0.378	0.41
	229.164	0.378	0.41
	229.367	0.377	0.41
	229.57	0.377	0.41
	229.773	0.377	0.41
	229.976	0.377	0.41
	230.178	0.377	0.409
	230.381	0.376	0.409
	230.584	0.376	0.409
	230.787	0.376	0.409
	230.99	0.376	0.409
	231.192	0.376	0.409
	231.395	0.376	0.409
	231.598	0.376	0.409
	231.801	0.376	0.409
	232.004	0.375	0.409
7	232.206	0.375	0.409
	232.409	0.375	0.409
	232.612	0.375	0.409
	232.815	0.375	0.41
	233.018	0.375	0.41
	233.22	0.375	0.41
	233.423	0.375	0.41
	233.626	0.374	0.41
	233.829	0.374	0.411
	234.032	0.374	0.411
	234.234	0.374	0.412
	234.437	0.374	0.412
	234.64	0.374	0.412
	234.843	0.374	0.413
	235.046	0.374	0.413
	235.248	0.374	0.414
	235.451	0.374	0.414
	235.654	0.374	0.415
	235.857	0.374	0.416
	236.06	0.374	0.417
	236.262	0.375	0.418
	236.465	0.375	0.419
	236.668	0.375	0.42
	236.871	0.376	0.422
	237.074	0.376	0.423
	237.276	0.376	0.424
	237.479	0.376	0.426
	237.682	0.376	0.428
	237.885	0.376	0.429
	238.088	0.376	0.431
	238.29	0.377	0.433
	238.493	0.377	0.436
	238.696	0.377	0.438
	238.899	0.377	0.441
	239.102	0.378	0.443
	239.304	0.378	0.446
	239.507	0.378	0.45
	239.71	0.379	0.453
	239.913	0.379	0.457
	240.116	0.379	0.461
	240.318	0.38	0.465
	240.521	0.38	0.469
	240.724	0.381	0.473
	240.927	0.382	0.478
	241.13	0.383	0.483
	241.332	0.384	0.489
	241.535	0.385	0.494
	241.738	0.386	0.501
	241.941	0.387	0.507
	242.144	0.389	0.514
	242.346	0.39	0.521
	242.549	0.392	0.528
	242.752	0.394	0.536
	242.955	0.395	0.544
	243.158	0.397	0.555
	243.36	0.399	0.564
	243.563	0.402	0.572
	243.766	0.405	0.581
	243.969	0.407	0.589
	244.172	0.41	0.598
	244.374	0.414	0.607
	244.577	0.417	0.616
	244.78	0.421	0.625
	244.983	0.425	0.634
	245.186	0.43	0.643
	245.388	0.434	0.653
	245.591	0.439	0.662
	245.794	0.445	0.671
	245.997	0.451	0.68
	246.2	0.457	0.689
	246.402	0.463	0.698
	246.605	0.47	0.707
	246.808	0.478	0.716
	247.011	0.485	0.724
	247.214	0.493	0.732
	247.416	0.502	0.741
	247.619	0.511	0.748
	247.822	0.52	0.756
	248.025	0.53	0.763
	248.228	0.54	0.769
	248.43	0.549	0.776
	248.633	0.56	0.782
	248.836	0.57	0.788
	249.039	0.581	0.793
	249.242	0.592	0.798
	249.444	0.602	0.803
	249.647	0.613	0.807
	249.85	0.624	0.811
	250.053	0.635	0.814
	250.256	0.646	0.819
	250.458	0.657	0.821
	250.661	0.673	0.823
	250.864	0.683	0.825
	251.067	0.693	0.826
	251.27	0.703	0.826
	251.472	0.713	0.827
	251.675	0.722	0.826
	251.878	0.731	0.826
	252.081	0.74	0.825
	252.284	0.748	0.824
	252.486	0.756	0.822
	252.689	0.763	0.82
	252.892	0.769	0.817
	253.095	0.776	0.814
	253.298	0.782	0.811
	253.5	0.787	0.808
	253.703	0.792	0.804
	253.906	0.796	0.801
	254.109	0.8	0.796
	254.312	0.804	0.792
	254.515	0.806	0.787
	254.717	0.808	0.782
	254.92	0.81	0.777
	255.123	0.812	0.771
	255.326	0.813	0.765
	255.528	0.813	0.759
	255.731	0.813	0.753
	255.934	0.813	0.747
	256.137	0.812	0.741
	256.34	0.81	0.734
	256.542	0.809	0.728
	256.745	0.807	0.721
	256.948	0.804	0.714
	257.151	0.801	0.707
	257.354	0.798	0.7
	257.557	0.795	0.69
	257.759	0.788	0.683
	257.962	0.784	0.676
	258.165	0.779	0.669
	258.368	0.774	0.663
	258.571	0.768	0.656
	258.773	0.763	0.649
	258.976	0.757	0.642
	259.179	0.75	0.636
	259.382	0.744	0.629
	259.584	0.737	0.623
	259.787	0.731	0.617
	259.99	0.723	0.611
	260.193	0.716	0.605
	260.396	0.709	0.599
	260.598	0.702	0.593
	260.801	0.694	0.588
	261.004	0.687	0.582
8	261.207	0.679	0.577
	261.41	0.671	0.572
	261.613	0.664	0.566
	261.815	0.656	0.561
	262.018	0.649	0.557
	262.221	0.641	0.552
	262.424	0.635	0.548
	262.627	0.628	0.544
	262.829	0.621	0.54
	263.032	0.615	0.537
	263.235	0.608	0.533
	263.438	0.602	0.53
	263.641	0.596	0.526
	263.843	0.59	0.523
	264.046	0.583	0.519
	264.249	0.577	0.516
	264.452	0.571	0.513
	264.654	0.565	0.51
	264.857	0.559	0.507
	265.06	0.553	0.504
	265.263	0.548	0.501
	265.466	0.542	0.497
	265.669	0.534	0.494
	265.871	0.528	0.492
	266.074	0.524	0.489
	266.277	0.519	0.487
	266.48	0.514	0.484
	266.683	0.509	0.482
	266.885	0.505	0.48
	267.088	0.5	0.477
	267.291	0.496	0.475
	267.494	0.492	0.473
	267.697	0.488	0.471
	267.899	0.484	0.469
	268.102	0.481	0.466
	268.305	0.477	0.464
	268.508	0.473	0.463
	268.711	0.47	0.461
	268.913	0.467	0.458
	269.116	0.464	0.457
	269.319	0.461	0.455
	269.522	0.458	0.453
	269.725	0.455	0.452
	269.927	0.452	0.45
	270.13	0.45	0.448
	270.333	0.448	0.447
	270.536	0.445	0.445
	270.739	0.442	0.444
	270.941	0.44	0.443
	271.144	0.438	0.441
	271.347	0.436	0.44
	271.55	0.433	0.438
	271.753	0.431	0.437
	271.955	0.429	0.436
	272.158	0.427	0.434
	272.361	0.425	0.433
	272.564	0.424	0.431
	272.767	0.422	0.43
	272.969	0.419	0.429
	273.172	0.418	0.428
	273.375	0.416	0.427
	273.578	0.414	0.425
	273.781	0.413	0.424
	273.983	0.411	0.423
	274.186	0.409	0.422
	274.389	0.408	0.421
	274.592	0.407	0.42
	274.795	0.405	0.419
	274.997	0.404	0.418
	275.2	0.403	0.417
	275.403	0.401	0.416
	275.606	0.4	0.415
	275.809	0.398	0.414
	276.011	0.397	0.413
	276.214	0.396	0.412
	276.417	0.395	0.411
	276.62	0.394	0.41
	276.823	0.393	0.409
	277.025	0.392	0.409
	277.228	0.391	0.407
	277.431	0.389	0.407
	277.634	0.389	0.406
	277.837	0.388	0.405
	278.039	0.387	0.404
	278.242	0.386	0.403
	278.445	0.385	0.402
	278.648	0.384	0.401
	278.851	0.383	0.401
	279.053	0.382	0.4
	279.256	0.381	0.399
	279.459	0.38	0.398
	279.662	0.379	0.397
	279.865	0.379	0.396
	280.067	0.377	0.395
	280.27	0.376	0.395
	280.473	0.376	0.394
	280.676	0.374	0.393
	280.879	0.374	0.392
	281.081	0.373	0.391
	281.284	0.372	0.391
	281.487	0.371	0.39
	281.69	0.37	0.389
	281.893	0.369	0.388
	282.095	0.368	0.387
	282.298	0.368	0.386
	282.501	0.367	0.386
	282.704	0.366	0.385
	282.907	0.365	0.384
	283.109	0.364	0.383
	283.312	0.364	0.383
	283.515	0.363	0.382
	283.718	0.362	0.381
	283.921	0.361	0.38
	284.123	0.361	0.379
	284.326	0.36	0.379
	284.529	0.359	0.378
	284.732	0.358	0.377
	284.935	0.357	0.376
	285.137	0.356	0.376
	285.34	0.355	0.374
	285.543	0.355	0.374
	285.746	0.354	0.373
	285.949	0.353	0.372
	286.151	0.352	0.371
	286.354	0.352	0.371
	286.557	0.351	0.37
	286.76	0.35	0.369
	286.963	0.349	0.368
	287.165	0.348	0.367
	287.368	0.347	0.366
	287.571	0.346	0.366
	287.774	0.346	0.365
	287.977	0.345	0.364
	288.179	0.344	0.364
	288.382	0.343	0.363
	288.585	0.343	0.362
	288.788	0.342	0.362
	288.991	0.341	0.361
	289.193	0.34	0.361
	289.396	0.34	0.36
	289.599	0.339	0.359
	289.802	0.338	0.358
	290.005	0.338	0.358
9	290.207	0.337	0.357
	290.41	0.336	0.356
	290.613	0.335	0.356
	290.816	0.335	0.355
	291.019	0.334	0.355
	291.221	0.333	0.354
	291.424	0.333	0.354
	291.627	0.332	0.353
	291.83	0.332	0.353
	292.033	0.331	0.352
	292.235	0.331	0.352
	292.438	0.33	0.351
	292.641	0.33	0.351
	292.844	0.329	0.35
	293.047	0.329	0.35
	293.249	0.328	0.349
	293.452	0.328	0.349
	293.655	0.327	0.349
	293.858	0.326	0.348
	294.061	0.326	0.347
	294.263	0.326	0.347
	294.466	0.325	0.347
	294.669	0.325	0.346
	294.872	0.324	0.346
	295.075	0.323	0.346
	295.277	0.323	0.345
	295.48	0.322	0.345
	295.683	0.322	0.344
	295.886	0.322	0.344
	296.089	0.321	0.344
	296.291	0.32	0.343
	296.494	0.32	0.343
	296.697	0.32	0.343
	296.9	0.319	0.342
	297.103	0.319	0.342
	297.305	0.319	0.342
	297.508	0.318	0.341
	297.711	0.318	0.341
	297.914	0.317	0.341
	298.117	0.317	0.341
	298.319	0.317	0.34
	298.522	0.316	0.34
	298.725	0.316	0.34
	298.928	0.316	0.34
	299.131	0.316	0.339
	299.333	0.315	0.339
	299.536	0.315	0.339
	299.739	0.314	0.339
	299.942	0.314	0.338
	300.145	0.314	0.338
	300.347	0.314	0.338
	300.55	0.313	0.338
	300.753	0.313	0.337
	300.956	0.313	0.337
	301.159	0.313	0.337
	301.361	0.312	0.337
	301.564	0.312	0.336
	301.767	0.312	0.336
	301.97	0.312	0.336
	302.173	0.311	0.335
	302.375	0.311	0.335
	302.578	0.311	0.335
	302.781	0.311	0.335
	302.984	0.31	0.334
	303.187	0.31	0.334
	303.389	0.31	0.334
	303.592	0.31	0.334
	303.795	0.31	0.334
	303.998	0.309	0.333
	304.201	0.309	0.333
	304.403	0.309	0.332
	304.606	0.308	0.332
	304.809	0.308	0.332
	305.012	0.308	0.332
	305.215	0.308	0.331
	305.417	0.308	0.331
	305.62	0.307	0.331
	305.823	0.307	0.33
	306.026	0.307	0.33
	306.229	0.307	0.329
	306.431	0.307	0.329
	306.634	0.306	0.329
	306.837	0.306	0.329
	307.04	0.306	0.328
	307.243	0.305	0.328
	307.445	0.305	0.328
	307.648	0.305	0.327
	307.851	0.305	0.327
	308.054	0.304	0.327
	308.257	0.304	0.326
	308.459	0.304	0.326
	308.662	0.304	0.326
	308.865	0.303	0.325
	309.068	0.303	0.325
	309.271	0.303	0.324
	309.473	0.302	0.324
	309.676	0.302	0.323
	309.879	0.302	0.323
	310.082	0.301	0.323
	310.285	0.301	0.322
	310.487	0.301	0.322
	310.69	0.3	0.322
	310.893	0.3	0.322
	311.096	0.299	0.321
	311.299	0.299	0.321
	311.501	0.299	0.32
	311.704	0.299	0.32
	311.907	0.299	0.32
	312.11	0.298	0.32
	312.313	0.298	0.32
	312.515	0.298	0.319
	312.718	0.298	0.319
	312.921	0.298	0.319
	313.124	0.297	0.319
	313.327	0.297	0.319
	313.529	0.297	0.319
	313.732	0.297	0.319
	313.935	0.296	0.319
	314.138	0.296	0.319
	314.341	0.296	0.319
	314.543	0.296	0.318
	314.746	0.296	0.319
	314.949	0.296	0.319
	315.152	0.296	0.319
	315.355	0.296	0.319
	315.557	0.296	0.319
	315.76	0.296	0.319
	315.963	0.296	0.319
	316.166	0.296	0.319
	316.369	0.296	0.32
	316.571	0.296	0.32
	316.774	0.296	0.32
	316.977	0.297	0.321
	317.18	0.297	0.321
	317.383	0.298	0.322
	317.585	0.298	0.322
	317.788	0.298	0.323
	317.991	0.299	0.323
	318.194	0.3	0.324
	318.397	0.3	0.325
	318.599	0.301	0.325
	318.802	0.302	0.326
	319.005	0.303	0.327
10	319.208	0.304	0.328
	319.411	0.305	0.329
	319.613	0.306	0.33
	319.816	0.308	0.331
	320.019	0.31	0.332
	320.222	0.311	0.333
	320.425	0.313	0.334
	320.627	0.314	0.335
	320.83	0.316	0.337
	321.033	0.317	0.338
	321.236	0.318	0.339
	321.439	0.319	0.34
	321.641	0.32	0.341
	321.844	0.322	0.343
	322.047	0.323	0.344
	322.25	0.325	0.345
	322.453	0.326	0.346
	322.655	0.328	0.347
	322.858	0.329	0.348
	323.061	0.331	0.35
	323.264	0.332	0.351
	323.467	0.334	0.352
	323.669	0.336	0.353
	323.872	0.337	0.354
	324.075	0.339	0.356
	324.278	0.34	0.357
	324.481	0.342	0.358
	324.683	0.344	0.359
	324.886	0.345	0.36
	325.089	0.346	0.361
	325.292	0.347	0.362
	325.495	0.348	0.362
	325.697	0.349	0.363
	325.9	0.35	0.364
	326.103	0.35	0.364
	326.306	0.351	0.364
	326.509	0.351	0.365
	326.711	0.352	0.365
	326.914	0.352	0.365
	327.117	0.352	0.365
	327.32	0.352	0.365
	327.523	0.352	0.365
	327.725	0.352	0.365
	327.928	0.351	0.364
	328.131	0.351	0.364
	328.334	0.35	0.364
	328.537	0.35	0.363
	328.739	0.349	0.362
	328.942	0.348	0.362
	329.145	0.347	0.361
	329.348	0.347	0.361
	329.551	0.346	0.36
	329.753	0.344	0.359
	329.956	0.343	0.358
	330.159	0.342	0.357
	330.362	0.341	0.356
	330.565	0.34	0.355
	330.767	0.338	0.354
	330.97	0.337	0.353
	331.173	0.336	0.352
	331.376	0.335	0.35
	331.579	0.333	0.349
	331.781	0.331	0.348
	331.984	0.33	0.347
	332.187	0.329	0.346
	332.39	0.328	0.344
	332.593	0.326	0.343
	332.795	0.325	0.342
	332.998	0.324	0.341
	333.201	0.323	0.34
	333.404	0.321	0.339
	333.607	0.32	0.338
	333.809	0.319	0.337
	334.012	0.318	0.335
	334.215	0.317	0.335
	334.418	0.316	0.334
	334.621	0.315	0.333
	334.823	0.314	0.332
	335.026	0.313	0.331
	335.229	0.312	0.33
	335.432	0.311	0.329
	335.635	0.311	0.328
	335.837	0.31	0.328
	336.04	0.309	0.327
	336.243	0.308	0.326
	336.446	0.308	0.325
	336.649	0.307	0.325
	336.851	0.307	0.324
	337.054	0.306	0.323
	337.257	0.306	0.323
	337.46	0.305	0.322
	337.663	0.305	0.322
	337.865	0.304	0.322
	338.068	0.304	0.321
	338.271	0.304	0.32
	338.474	0.303	0.32
	338.677	0.303	0.319
	338.879	0.302	0.319
	339.082	0.302	0.319
	339.285	0.302	0.318
	339.488	0.302	0.318
	339.691	0.301	0.317
	339.893	0.301	0.317
	340.096	0.301	0.317
	340.299	0.3	0.317
	340.502	0.3	0.316
	340.705	0.3	0.316
	340.907	0.299	0.316
	341.11	0.299	0.315
	341.313	0.299	0.315
	341.516	0.299	0.314
	341.719	0.298	0.314
	341.921	0.298	0.314
	342.124	0.298	0.314
	342.327	0.297	0.313
	342.53	0.297	0.313
	342.733	0.296	0.313
	342.935	0.296	0.312
	343.138	0.296	0.312
	343.341	0.295	0.311
	343.544	0.295	0.311
	343.747	0.295	0.311
	343.949	0.295	0.31
	344.152	0.294	0.31
	344.355	0.293	0.31
	344.558	0.293	0.309
	344.761	0.293	0.309
	344.963	0.292	0.308
	345.166	0.292	0.308
	345.369	0.292	0.307
	345.572	0.291	0.307
	345.775	0.291	0.306
	345.977	0.29	0.306
	346.18	0.29	0.305
	346.383	0.289	0.305
	346.586	0.289	0.304
	346.789	0.289	0.304
	346.991	0.288	0.304
	347.194	0.288	0.303
	347.397	0.287	0.302
	347.6	0.287	0.302
	347.803	0.287	0.302
	348.005	0.286	0.301
11	348.208	0.286	0.301
	348.411	0.286	0.3
	348.614	0.285	0.3
	348.817	0.285	0.299
	349.019	0.284	0.299
	349.222	0.284	0.299
	349.425	0.284	0.298
	349.628	0.284	0.298
	349.831	0.283	0.298
	350.033	0.283	0.298
	350.236	0.283	0.297
	350.439	0.283	0.297
	350.642	0.283	0.297
	350.845	0.283	0.296
	351.047	0.283	0.296
	351.25	0.282	0.296
	351.453	0.282	0.296
	351.656	0.282	0.295
	351.859	0.282	0.295
	352.061	0.282	0.295
	352.264	0.281	0.295
	352.467	0.281	0.295
	352.67	0.281	0.294
	352.873	0.281	0.294
	353.075	0.281	0.294
	353.278	0.281	0.294
	353.481	0.281	0.294
	353.684	0.281	0.293
	353.887	0.281	0.293
	354.089	0.281	0.293
	354.292	0.281	0.293
	354.495	0.28	0.293
	354.698	0.28	0.293
	354.901	0.28	0.293
	355.103	0.28	0.292
	355.306	0.28	0.292
	355.509	0.28	0.292
	355.712	0.28	0.292
	355.915	0.28	0.292
	356.117	0.28	0.292
	356.32	0.28	0.292
	356.523	0.28	0.292
	356.726	0.28	0.292
	356.929	0.28	0.292
	357.131	0.28	0.292
	357.334	0.28	0.292
	357.537	0.28	0.292
	357.74	0.28	0.292
	357.943	0.28	0.292
	358.145	0.28	0.292
	358.348	0.28	0.292
	358.551	0.281	0.292
	358.754	0.281	0.292
	358.957	0.281	0.292
	359.159	0.281	0.292
	359.362	0.281	0.292
	359.565	0.281	0.292
	359.768	0.281	0.292
	359.971	0.281	0.292
	360.173	0.281	0.292
	360.376	0.281	0.293
	360.579	0.282	0.293
	360.782	0.282	0.293
	360.985	0.283	0.293
	361.187	0.283	0.293
	361.39	0.284	0.294
	361.593	0.284	0.295
	361.796	0.285	0.295
	361.999	0.286	0.295
	362.201	0.287	0.296
	362.404	0.287	0.297
	362.607	0.289	0.297
	362.81	0.29	0.298
	363.013	0.291	0.299
	363.215	0.292	0.3
	363.418	0.293	0.301
	363.621	0.295	0.302
	363.824	0.296	0.304
	364.027	0.298	0.305
	364.229	0.3	0.307
	364.432	0.302	0.308
	364.635	0.304	0.31
	364.838	0.306	0.312
	365.041	0.308	0.314
	365.243	0.311	0.316
	365.446	0.313	0.318
	365.649	0.315	0.32
	365.852	0.318	0.322
	366.055	0.32	0.324
	366.257	0.323	0.326
	366.46	0.325	0.329
	366.663	0.327	0.331
	366.866	0.329	0.334
	367.069	0.332	0.336
	367.272	0.334	0.338
	367.474	0.336	0.34
	367.677	0.338	0.342
	367.88	0.34	0.345
	368.083	0.342	0.347
	368.285	0.344	0.349
	368.488	0.346	0.35
	368.691	0.347	0.352
	368.894	0.348	0.353
	369.097	0.349	0.355
	369.299	0.35	0.356
	369.502	0.35	0.357
	369.705	0.351	0.358
	369.908	0.351	0.358
	370.111	0.351	0.359
	370.313	0.351	0.359
	370.516	0.351	0.359
	370.719	0.351	0.359
	370.922	0.35	0.359
	371.125	0.35	0.359
	371.328	0.349	0.358
	371.53	0.348	0.358
	371.733	0.347	0.358
	371.936	0.346	0.357
	372.139	0.346	0.356
	372.342	0.344	0.355
	372.544	0.343	0.354
	372.747	0.342	0.353
	372.95	0.34	0.353
	373.153	0.339	0.352
	373.355	0.338	0.351
	373.558	0.336	0.35
	373.761	0.335	0.349
	373.964	0.334	0.347
	374.167	0.332	0.346
	374.369	0.331	0.344
	374.572	0.329	0.343
	374.775	0.328	0.341
	374.978	0.327	0.339
	375.181	0.326	0.338
	375.384	0.324	0.337
	375.586	0.323	0.335
	375.789	0.322	0.334
	375.992	0.32	0.333
	376.195	0.319	0.332
	376.398	0.319	0.331
	376.6	0.318	0.33
	376.803	0.317	0.329
	377.006	0.316	0.328
12	377.209	0.315	0.327
	377.412	0.314	0.326
	377.614	0.314	0.326
	377.817	0.313	0.325
	378.02	0.313	0.324
	378.223	0.312	0.323
	378.425	0.311	0.323
	378.628	0.311	0.322
	378.831	0.31	0.322
	379.034	0.31	0.321
	379.237	0.31	0.321
	379.44	0.309	0.32
	379.642	0.309	0.32
	379.845	0.308	0.319
	380.048	0.308	0.319
	380.251	0.307	0.318
	380.454	0.307	0.318
	380.656	0.306	0.317
	380.859	0.306	0.316
	381.062	0.305	0.316
	381.265	0.305	0.315
	381.468	0.304	0.315
	381.67	0.304	0.314
	381.873	0.303	0.313
	382.076	0.303	0.313
	382.279	0.302	0.312
	382.482	0.302	0.311
	382.684	0.301	0.311
	382.887	0.3	0.31
	383.09	0.3	0.309
	383.293	0.299	0.309
	383.496	0.298	0.308
	383.698	0.298	0.307
	383.901	0.297	0.307
	384.104	0.296	0.306
	384.307	0.296	0.306
	384.51	0.295	0.305
	384.712	0.295	0.305
	384.915	0.294	0.304
	385.118	0.294	0.304
	385.321	0.293	0.303
	385.524	0.293	0.303
	385.726	0.292	0.302
	385.929	0.292	0.302
	386.132	0.292	0.302
	386.335	0.291	0.302
	386.538	0.291	0.301
	386.74	0.29	0.301
	386.943	0.29	0.301
	387.146	0.29	0.301
	387.349	0.29	0.301
	387.552	0.289	0.301
	387.754	0.289	0.301
	387.957	0.289	0.301
	388.16	0.289	0.301
	388.363	0.289	0.301
	388.566	0.289	0.301
	388.768	0.289	0.301
	388.971	0.288	0.302
	389.174	0.288	0.302
	389.377	0.288	0.302
	389.58	0.289	0.303
	389.782	0.289	0.303
	389.985	0.289	0.304
	390.188	0.289	0.305
	390.391	0.289	0.305
	390.594	0.289	0.306
	390.796	0.289	0.307
	390.999	0.29	0.308
	391.202	0.29	0.31
	391.405	0.29	0.311
	391.608	0.291	0.312
	391.81	0.291	0.314
	392.013	0.292	0.315
	392.216	0.292	0.317
	392.419	0.293	0.319
	392.622	0.294	0.321
	392.824	0.295	0.323
	393.027	0.296	0.326
	393.23	0.297	0.328
	393.433	0.298	0.331
	393.636	0.299	0.333
	393.838	0.301	0.336
	394.041	0.302	0.339
	394.244	0.304	0.342
	394.447	0.305	0.344
	394.65	0.308	0.347
	394.852	0.31	0.35
	395.055	0.312	0.353
	395.258	0.314	0.356
	395.461	0.317	0.359
	395.664	0.319	0.362
	395.866	0.322	0.365
	396.069	0.325	0.368
	396.272	0.328	0.37
	396.475	0.33	0.372
	396.678	0.333	0.374
	396.88	0.336	0.376
	397.083	0.339	0.378
	397.286	0.342	0.38
	397.489	0.346	0.381
	397.692	0.349	0.382
	397.894	0.351	0.383
	398.097	0.353	0.383
	398.3	0.356	0.383
	398.503	0.358	0.383
	398.706	0.36	0.383
	398.908	0.362	0.383
	399.111	0.363	0.382
	399.314	0.364	0.381
	399.517	0.365	0.38
	399.72	0.367	0.379
	399.922	0.367	0.378
	400.125	0.368	0.377
	400.328	0.368	0.375
	400.531	0.368	0.374
	400.734	0.368	0.372
	400.936	0.368	0.371
	401.139	0.367	0.369
	401.342	0.366	0.368
	401.545	0.365	0.366
	401.748	0.365	0.364
	401.95	0.364	0.363
	402.153	0.362	0.361
	402.356	0.361	0.36
	402.559	0.359	0.358
	402.762	0.358	0.357
	402.964	0.356	0.356
	403.167	0.355	0.354
	403.37	0.353	0.353
	403.573	0.352	0.352
	403.776	0.35	0.35
	403.978	0.349	0.349
	404.181	0.347	0.348
	404.384	0.346	0.346
	404.587	0.344	0.346
	404.79	0.342	0.344
	404.992	0.341	0.343
	405.195	0.34	0.342
	405.398	0.338	0.341
	405.601	0.337	0.34
	405.804	0.336	0.339
	406.006	0.335	0.338
13	406.209	0.334	0.338
	406.412	0.332	0.337
	406.615	0.331	0.336
	406.818	0.331	0.335
	407.02	0.329	0.335
	407.223	0.328	0.334
	407.426	0.328	0.334
	407.629	0.327	0.333
	407.832	0.326	0.333
	408.034	0.325	0.332
	408.237	0.324	0.332
	408.44	0.323	0.332
	408.643	0.323	0.332
	408.846	0.322	0.332
	409.048	0.321	0.332
	409.251	0.32	0.332
	409.454	0.32	0.332
	409.657	0.319	0.333
	409.86	0.318	0.333
	410.062	0.317	0.334
	410.265	0.317	0.335
	410.468	0.316	0.335
	410.671	0.315	0.336
	410.874	0.315	0.337
	411.076	0.314	0.338
	411.279	0.314	0.34
	411.482	0.313	0.341
	411.685	0.313	0.343
	411.888	0.312	0.345
	412.09	0.312	0.347
	412.293	0.311	0.35
	412.496	0.311	0.353
	412.699	0.311	0.355
	412.902	0.311	0.358
	413.104	0.311	0.361
	413.307	0.311	0.363
	413.51	0.312	0.366
	413.713	0.312	0.369
	413.916	0.313	0.372
	414.118	0.313	0.375
	414.321	0.314	0.378
	414.524	0.314	0.381
	414.727	0.316	0.384
	414.93	0.317	0.386
	415.132	0.318	0.389
	415.335	0.319	0.392
	415.538	0.32	0.394
	415.741	0.322	0.396
	415.944	0.324	0.398
	416.146	0.326	0.4
	416.349	0.328	0.401
	416.552	0.33	0.402
	416.755	0.333	0.403
	416.958	0.335	0.403
	417.16	0.338	0.404
	417.363	0.341	0.404
	417.566	0.343	0.403
	417.769	0.346	0.403
	417.972	0.349	0.403
	418.174	0.352	0.402
	418.377	0.355	0.401
	418.58	0.358	0.4
	418.783	0.361	0.398
	418.986	0.364	0.397
	419.188	0.367	0.396
	419.391	0.369	0.394
	419.594	0.371	0.392
	419.797	0.375	0.39
	420	0.377	0.389
	420.202	0.379	0.387
	420.405	0.38	0.385
	420.608	0.381	0.384
	420.811	0.382	0.382
	421.014	0.383	0.381
	421.216	0.384	0.379
	421.419	0.384	0.378
	421.622	0.384	0.376
	421.825	0.384	0.375
	422.028	0.383	0.374
	422.23	0.383	0.373
	422.433	0.382	0.371
	422.636	0.382	0.37
	422.839	0.38	0.369
	423.042	0.379	0.368
	423.244	0.378	0.367
	423.447	0.377	0.367
	423.65	0.375	0.366
	423.853	0.374	0.365
	424.056	0.372	0.365
	424.258	0.371	0.365
	424.461	0.369	0.365
	424.664	0.367	0.365
	424.867	0.366	0.365
	425.07	0.364	0.365
	425.272	0.362	0.365
	425.475	0.361	0.366
	425.678	0.359	0.367
	425.881	0.358	0.368
	426.084	0.356	0.369
	426.286	0.355	0.37
	426.489	0.353	0.371
	426.692	0.352	0.374
	426.895	0.35	0.375
	427.098	0.349	0.377
	427.3	0.347	0.379
	427.503	0.346	0.381
	427.706	0.345	0.383
	427.909	0.344	0.385
	428.112	0.343	0.387
	428.314	0.343	0.389
	428.517	0.342	0.392
	428.72	0.341	0.394
	428.923	0.34	0.396
	429.126	0.34	0.398
	429.328	0.34	0.4
	429.531	0.339	0.403
	429.734	0.339	0.404
	429.937	0.339	0.406
	430.14	0.339	0.408
	430.342	0.339	0.409
	430.545	0.34	0.41
	430.748	0.34	0.412
	430.951	0.341	0.413
	431.154	0.341	0.413
	431.356	0.342	0.414
	431.559	0.343	0.415
	431.762	0.345	0.415
	431.965	0.346	0.415
	432.168	0.347	0.415
	432.37	0.349	0.414
	432.573	0.351	0.414
	432.776	0.353	0.413
	432.979	0.355	0.413
	433.182	0.357	0.412
	433.384	0.359	0.411
	433.587	0.362	0.41
	433.79	0.364	0.408
	433.993	0.367	0.407
	434.196	0.37	0.406
	434.398	0.372	0.405
	434.601	0.375	0.404
	434.804	0.377	0.402
	435.007	0.379	0.401
14	435.21	0.381	0.4
	435.412	0.383	0.399
	435.615	0.385	0.398
	435.818	0.386	0.397
	436.021	0.388	0.396
	436.224	0.389	0.395
	436.426	0.391	0.395
	436.629	0.391	0.394
	436.832	0.392	0.394
	437.035	0.393	0.394
	437.238	0.394	0.393
	437.44	0.394	0.393
	437.643	0.394	0.393
	437.846	0.394	0.394
	438.049	0.394	0.394
	438.252	0.394	0.394
	438.454	0.393	0.394
	438.657	0.392	0.395
	438.86	0.391	0.395
	439.063	0.39	0.397
	439.266	0.389	0.397
	439.468	0.388	0.398
	439.671	0.387	0.399
	439.874	0.385	0.4
	440.077	0.384	0.401
	440.28	0.383	0.403
	440.482	0.382	0.404
	440.685	0.38	0.405
	440.888	0.379	0.406
	441.091	0.377	0.408
	441.294	0.376	0.409
	441.496	0.375	0.41
	441.699	0.374	0.412
	441.902	0.373	0.413
	442.105	0.371	0.414
	442.308	0.37	0.415
	442.51	0.37	0.416
	442.713	0.369	0.417
	442.916	0.368	0.418
	443.119	0.368	0.418
	443.322	0.368	0.419
	443.524	0.368	0.419
	443.727	0.368	0.419
	443.93	0.368	0.419
	444.133	0.368	0.419
	444.336	0.368	0.419
	444.538	0.369	0.419
	444.741	0.369	0.419
	444.944	0.37	0.419
	445.147	0.371	0.418
	445.35	0.372	0.418
	445.552	0.373	0.417
	445.755	0.374	0.416
	445.958	0.375	0.416
	446.161	0.377	0.415
	446.364	0.378	0.415
	446.566	0.379	0.414
	446.769	0.38	0.413
	446.972	0.382	0.413
	447.175	0.383	0.413
	447.378	0.385	0.412
	447.58	0.386	0.412
	447.783	0.388	0.411
	447.986	0.389	0.411
	448.189	0.391	0.411
	448.392	0.392	0.411
	448.594	0.393	0.411
	448.797	0.394	0.411
	449	0.395	0.411
	449.203	0.397	0.411
	449.406	0.397	0.411
	449.608	0.398	0.412
	449.811	0.398	0.412
	450.014	0.398	0.412
	450.217	0.398	0.412
	450.42	0.398	0.413
	450.622	0.398	0.413
	450.825	0.398	0.414
	451.028	0.397	0.414
	451.231	0.397	0.415
	451.434	0.396	0.415
	451.636	0.395	0.416
	451.839	0.395	0.416
	452.042	0.394	0.416
	452.245	0.393	0.417
	452.448	0.392	0.418
	452.65	0.392	0.418
	452.853	0.391	0.418
	453.056	0.39	0.418
	453.259	0.39	0.419
	453.462	0.389	0.419
	453.664	0.389	0.419
	453.867	0.388	0.419
	454.07	0.388	0.419
	454.273	0.388	0.419
	454.476	0.387	0.419
	454.678	0.387	0.419
	454.881	0.387	0.419
	455.084	0.387	0.419
	455.287	0.387	0.419
	455.49	0.388	0.419
	455.692	0.388	0.418
	455.895	0.388	0.418
	456.098	0.388	0.418
	456.301	0.389	0.417
	456.504	0.389	0.417
	456.706	0.39	0.416
	456.909	0.39	0.416
	457.112	0.391	0.416
	457.315	0.391	0.416
	457.518	0.392	0.415
	457.72	0.393	0.415
	457.923	0.393	0.415
	458.126	0.394	0.415
	458.329	0.395	0.415
	458.532	0.395	0.414
	458.734	0.396	0.414
	458.937	0.396	0.414
	459.14	0.397	0.414
	459.343	0.397	0.414
	459.546	0.398	0.413
	459.748	0.398	0.413
	459.951	0.398	0.413
	460.154	0.398	0.413
	460.357	0.399	0.413
	460.56	0.399	0.414
	460.762	0.399	0.414
	460.965	0.399	0.414
	461.168	0.399	0.414
	461.371	0.399	0.414
	461.574	0.399	0.414
	461.776	0.398	0.414
	461.979	0.398	0.415
	462.182	0.398	0.415
	462.385	0.398	0.415
	462.588	0.398	0.415
	462.79	0.397	0.415
	462.993	0.397	0.415
	463.196	0.397	0.415
	463.399	0.396	0.415
	463.602	0.396	0.415
	463.804	0.396	0.415
	464.007	0.395	0.415
15	464.21	0.395	0.415
	464.413	0.395	0.415
	464.616	0.395	0.414
	464.818	0.395	0.414
	465.021	0.395	0.414
	465.224	0.394	0.414
	465.427	0.394	0.413
	465.63	0.394	0.413
	465.832	0.394	0.413
	466.035	0.394	0.413
	466.238	0.394	0.412
	466.441	0.394	0.412
	466.644	0.394	0.412
	466.846	0.394	0.412
	467.049	0.395	0.412
	467.252	0.395	0.411
	467.455	0.395	0.411
	467.658	0.395	0.411
	467.86	0.395	0.41
	468.063	0.395	0.41
	468.266	0.395	0.41
	468.469	0.395	0.41
	468.672	0.395	0.41
	468.874	0.396	0.41
	469.077	0.396	0.41
	469.28	0.396	0.409
	469.483	0.397	0.409
	469.686	0.397	0.409
	469.888	0.397	0.409
	470.091	0.397	0.409
	470.294	0.397	0.409
	470.497	0.397	0.409
	470.7	0.397	0.409
	470.902	0.397	0.409
	471.105	0.397	0.409
	471.308	0.397	0.409
	471.511	0.397	0.409
	471.714	0.397	0.409
	471.916	0.396	0.409
	472.119	0.396	0.409
	472.322	0.396	0.409
	472.525	0.395	0.409
	472.728	0.395	0.408
	472.93	0.395	0.408
	473.133	0.394	0.408
	473.336	0.394	0.407
	473.539	0.394	0.407
	473.742	0.393	0.407
	473.944	0.393	0.406
	474.147	0.392	0.406
	474.35	0.392	0.406
	474.553	0.392	0.406
	474.756	0.391	0.405
	474.958	0.391	0.405
	475.161	0.391	0.404
	475.364	0.391	0.404
	475.567	0.39	0.404
	475.77	0.39	0.403
	475.972	0.39	0.403
	476.175	0.39	0.403
	476.378	0.389	0.402
	476.581	0.389	0.402
	476.784	0.389	0.402
	476.986	0.389	0.401
	477.189	0.389	0.401
	477.392	0.389	0.401
	477.595	0.389	0.401
	477.798	0.389	0.4
	478	0.389	0.4
	478.203	0.389	0.4
	478.406	0.389	0.4
	478.609	0.388	0.4
	478.812	0.388	0.399
	479.014	0.388	0.399
	479.217	0.388	0.399
	479.42	0.388	0.399
	479.623	0.388	0.399
	479.826	0.387	0.398
	480.028	0.387	0.398
	480.231	0.386	0.398
	480.434	0.386	0.398
	480.637	0.386	0.398
	480.84	0.385	0.398
	481.042	0.385	0.398
	481.245	0.385	0.398
	481.448	0.384	0.397
	481.651	0.384	0.397
	481.854	0.383	0.397
	482.056	0.383	0.397
	482.259	0.382	0.397
	482.462	0.382	0.397
	482.665	0.382	0.397
	482.868	0.381	0.397
	483.07	0.381	0.397
	483.273	0.38	0.397
	483.476	0.38	0.397
	483.679	0.38	0.397
	483.882	0.379	0.397
	484.084	0.379	0.396
	484.287	0.379	0.396
	484.49	0.378	0.396
	484.693	0.378	0.396
	484.896	0.377	0.395
	485.098	0.377	0.395
	485.301	0.377	0.395
	485.504	0.377	0.395
	485.707	0.376	0.394
	485.91	0.376	0.394
	486.113	0.376	0.393
	486.315	0.375	0.393
	486.518	0.375	0.392
	486.721	0.374	0.392
	486.924	0.374	0.391
	487.126	0.374	0.391
	487.329	0.373	0.39
	487.532	0.373	0.389
	487.735	0.372	0.389
	487.938	0.371	0.388
	488.14	0.371	0.388
	488.343	0.37	0.388
	488.546	0.369	0.387
	488.749	0.368	0.386
	488.952	0.368	0.386
	489.154	0.367	0.385
	489.357	0.366	0.385
	489.56	0.365	0.385
	489.763	0.365	0.385
	489.966	0.364	0.384
	490.169	0.364	0.384
	490.371	0.363	0.384
	490.574	0.362	0.383
	490.777	0.361	0.383
	490.98	0.361	0.382
	491.183	0.36	0.382
	491.385	0.359	0.381
	491.588	0.359	0.38
	491.791	0.358	0.38
[truncated: 6 more rows]

## Sheet: Figure 4B
Figure 4B
Polysome profiling, percentage of Fgf13/Gapdh mRNA (normalize to input)
	Fraction #	WT-FGF13	Mut-FGF13	WT-GAPDH	Mut-GAPDH
	1	0.0796666	0.0384268	0.609515	0.493896
	2	0.173218	0.267951	1.71683	1.65592
	3	0.22762	0.4258	6.49367	7.03658
	4	0.850431	1.32801	4.61415	3.76997
	5	2.44625	2.91688	3.36639	5.79938
	6	2.84597	1.82899	2.48718	1.69082
	7	2.9505	2.6296	3.53251	4.77042
	8	5.84489	6.34759	5.57349	4.194
	9	3.6925	3.37931	2.1463	2.03705
	10	7.19037	11.126	4.36088	5.50425
	11	11.0128	13.0823	4.70344	3.55418
	12	13.4949	12.7973	8.16367	7.07867
	13	14.3505	11.9983	8.81575	7.21077
	14	14.8345	11.6285	11.156	11.1315
	15	10.8454	11.0258	15.5525	16.1951
	16	9.16051	9.1793	16.7077	17.8775

## Sheet: Figure 4C
Figure 4C
Polysome profiling, ratio of FGF13 or GAPDH mRNA in monosomes plus polysomes to free RNA
	Mouse #	WT-FGF13	Mut-FGF13	WT-GAPDH	Mut-GAPDH			Statistics summary
	1	14.0985	13.6928	4.18464	3.8908			Mut-FGF13 vs WT-FGF13 (Two-tailed Mann Whitney U test)
	2	14.9781	13.9442	3.94799	5.02461			P value					0.9372
	3	16.0378	12.5417	4.33126	4.71905			P value summary					ns
	4	11.8479	15.6128	2.48197	1.73781			Significantly different (P < 0.05)?					No
	5	11.0869	13.9037	3.23962	3.94065			Mut-GAPDH vs WT-GAPDH (Two-tailed Mann Whitney U test)
	6	18.5068	18.1523	3.96862	4.1312			P value					0.8182
								P value summary					ns
								Significantly different (P < 0.05)?					No

## Sheet: Figure 4D
Figure 4D
Polysome profiling, ratio of FGF13 or GAPDH mRNA in the heavy polysome versus that in the light polysome
	Mouse #	WT-FGF13	Mut-FGF13	WT-GAPDH	Mut-GAPDH			Statistics summary
	1	1.08084	0.649616	2.21041	1.93611			Mut-FGF13 vs WT-FGF13 (Two-tailed Mann Whitney U test)
	2	1.0129	0.866939	2.72557	3.28845			P value					0.026
	3	1.13116	0.877556	1.97139	1.7903			P value summary					*
	4	0.794068	0.70623	1.37518	1.66483			Significantly different (P < 0.05)?					Yes
	5	0.89299	0.564668	1.78673	1.73832			Mut-GAPDH vs WT-GAPDH (Two-tailed Mann Whitney U test)
	6	0.867962	0.821007	1.87424	2.06813			P value					0.9372
								P value summary					ns
								Significantly different (P < 0.05)?					No

## Sheet: Figure 4E
Figure 4E
RNA immunoprecipitation in HEK293 expressing HA-RPL22 and WT/Mut mouse FGF13 isoform 2 plasmids
		Normalized FGF13 mRNA enrichment (IP/input)
	Experiment #	Fgf13WT	Fgf13Mut				Statistics summary
	1	3.91792	0.205451				Mut vs WT (One-tailed paired t test)
	2	0.581596	0.442677				P value	0.0355
	3	0.159248	0.118372				P value summary	*
	4	5.98789	0.823991				Significantly different (P < 0.05)?	Yes
	5	5.15438	1.60678
