# Supplementary material for: 5'-UTR SNP of FGF13 causes translational defect and intellectual disability
Source: eLife. 2021 Jun 29;10:e63021. doi: 10.7554/eLife.63021 (PMC8241442; doi:10.7554/eLife.63021)
Supplement: Figure 5—figure supplement 1—source data 1. [file elife-63021-fig5-figsupp1-data1.xlsx]

## Sheet: Figure 5-figure supplement 1A
Figure 5-figure supplement 1A
Luminescence ratio of Firefly to Renilla, which is opposite to tranditional Renilla/Firefly
	Experiment #	EMCV	WT	Mut	Random
	1	61.9143	1.51429	1.25714	0.001167
	2	50.4419	1.55814	1.34884	0.001433
	3	81.9167	1.66667	1.375	0.0008
	4	48.3182	1.56818	1.40909	0.001467

## Sheet: Figure 5-figure supplement 1D
Figure 5-figure supplement 1D										Cells_name	cell_types	Table TPM	PTBP1	PTBP2
Re-analysis of single-cell data from the human fetal prefrontal cortex (Zhong et al., 2018)										GW08_PFC1_sc1	Neurons	GW08_PFC1_sc1	9.08	104.42
										GW08_PFC1_sc2	GABAergic neurons	GW08_PFC1_sc2	54.13	541.26
PS: sort cell_types and get neurons or stem cells (NPC in the figure) out										GW08_PFC1_sc3	Neurons	GW08_PFC1_sc3	8.87	0
										GW08_PFC1_sc4	Neurons	GW08_PFC1_sc4	0	0
										GW08_PFC1_sc5	Microglia	GW08_PFC1_sc5	205.59	2.19
										GW08_PFC1_sc6	Microglia	GW08_PFC1_sc6	39.24	0
										GW08_PFC1_sc7	Stem cells	GW08_PFC1_sc7	275.07	270.64
										GW08_PFC1_sc8	Neurons	GW08_PFC1_sc8	58.58	65.9
										GW08_PFC1_sc9	Neurons	GW08_PFC1_sc9	0	59.56
										GW08_PFC1_sc11	Stem cells	GW08_PFC1_sc11	268.83	230.43
										GW08_PFC1_sc12	Neurons	GW08_PFC1_sc12	31.4	157
										GW08_PFC1_sc13	Neurons	GW08_PFC1_sc13	13.52	364.91
										GW08_PFC1_sc14	Neurons	GW08_PFC1_sc14	46.99	0
										GW08_PFC1_sc15	Neurons	GW08_PFC1_sc15	0	0
										GW08_PFC1_sc16	GABAergic neurons	GW08_PFC1_sc16	450.05	402.67
										GW08_PFC1_sc17	Neurons	GW08_PFC1_sc17	17.57	316.27
										GW08_PFC1_sc18	Stem cells	GW08_PFC1_sc18	41.55	0
										GW08_PFC1_sc19	GABAergic neurons	GW08_PFC1_sc19	0	315.89
										GW08_PFC1_sc20	Neurons	GW08_PFC1_sc20	0	125.46
										GW08_PFC1_sc21	Neurons	GW08_PFC1_sc21	4.26	0
										GW08_PFC1_sc22	Neurons	GW08_PFC1_sc22	178.98	0
										GW08_PFC1_sc24	Neurons	GW08_PFC1_sc24	0	371.47
										GW08_PFC1_sc25	Neurons	GW08_PFC1_sc25	19.58	137.08
										GW09_PFC1_sc1	Stem cells	GW09_PFC1_sc1	366.94	2.82
										GW09_PFC1_sc2	Stem cells	GW09_PFC1_sc2	559.31	6.5
										GW09_PFC1_sc3	Stem cells	GW09_PFC1_sc3	0	0
										GW09_PFC1_sc4	Neurons	GW09_PFC1_sc4	0	84.82
										GW09_PFC1_sc5	Stem cells	GW09_PFC1_sc5	336.01	180.01
										GW09_PFC1_sc6	Neurons	GW09_PFC1_sc6	0	83.46
										GW09_PFC1_sc7	Neurons	GW09_PFC1_sc7	0	0
										GW09_PFC1_sc8	Neurons	GW09_PFC1_sc8	73.39	397.55
										GW09_PFC1_sc9	Neurons	GW09_PFC1_sc9	2.23	2.23
										GW09_PFC1_sc10	Neurons	GW09_PFC1_sc10	128.68	131.16
										GW09_PFC1_sc11	Stem cells	GW09_PFC1_sc11	0	0
										GW09_PFC1_sc12	Neurons	GW09_PFC1_sc12	0	84.06
										GW09_PFC1_sc13	Neurons	GW09_PFC1_sc13	0	128.54
										GW09_PFC1_sc14	Neurons	GW09_PFC1_sc14	82.7	68.11
										GW09_PFC1_sc15	Neurons	GW09_PFC1_sc15	0	142.36
										GW09_PFC1_sc16	Neurons	GW09_PFC1_sc16	37.83	0
										GW09_PFC1_sc17	Stem cells	GW09_PFC1_sc17	272.43	2.93
										GW09_PFC1_sc18	Neurons	GW09_PFC1_sc18	99.65	270.16
										GW09_PFC1_sc19	Stem cells	GW09_PFC1_sc19	208.57	235.48
										GW09_PFC1_sc20	Stem cells	GW09_PFC1_sc20	4.25	0
										GW09_PFC1_sc21	Neurons	GW09_PFC1_sc21	0	0
										GW09_PFC1_sc22	Stem cells	GW09_PFC1_sc22	107.69	84.14
										GW09_PFC1_sc23	Stem cells	GW09_PFC1_sc23	583.48	121.02
										GW09_PFC1_sc24	Stem cells	GW09_PFC1_sc24	758.21	142.16
										GW09_PFC1_sc25	Stem cells	GW09_PFC1_sc25	251.23	23.93
										GW09_PFC1_sc26	Stem cells	GW09_PFC1_sc26	485.56	105.3
										GW09_PFC1_sc27	Stem cells	GW09_PFC1_sc27	253.85	42.31
										GW09_PFC1_sc28	Neurons	GW09_PFC1_sc28	4.74	137.4
										GW09_PFC1_sc29	Neurons	GW09_PFC1_sc29	89.01	98.69
										GW09_PFC1_sc30	Neurons	GW09_PFC1_sc30	0	0
										GW09_PFC1_sc31	Neurons	GW09_PFC1_sc31	0	75.2
										GW09_PFC1_sc32	GABAergic neurons	GW09_PFC1_sc32	0	1467.3
										GW09_PFC1_sc33	Neurons	GW09_PFC1_sc33	270.56	138.84
										GW09_PFC1_sc34	Stem cells	GW09_PFC1_sc34	92.73	3.09
										GW09_PFC1_sc35	Stem cells	GW09_PFC1_sc35	265.58	3.16
										GW09_PFC1_sc36	Stem cells	GW09_PFC1_sc36	135.76	90.51
										GW09_PFC1_sc37	Stem cells	GW09_PFC1_sc37	47.54	80.82
										GW09_PFC1_sc38	Neurons	GW09_PFC1_sc38	0	115.9
										GW09_PFC1_sc39	Stem cells	GW09_PFC1_sc39	44.06	180.86
										GW09_PFC1_sc40	Stem cells	GW09_PFC1_sc40	2.17	4.34
										GW09_PFC1_sc41	Stem cells	GW09_PFC1_sc41	330.01	0
										GW09_PFC1_sc42	Stem cells	GW09_PFC1_sc42	5.55	83.31
										GW09_PFC1_sc43	Neurons	GW09_PFC1_sc43	0	754.67
										GW09_PFC1_sc44	Stem cells	GW09_PFC1_sc44	1189.46	0
										GW09_PFC1_sc45	Stem cells	GW09_PFC1_sc45	34.47	88.1
										GW09_PFC1_sc46	Neurons	GW09_PFC1_sc46	2.16	0
										GW09_PFC1_sc47	Stem cells	GW09_PFC1_sc47	6.17	24.7
										GW09_PFC1_sc48	Stem cells	GW09_PFC1_sc48	11.97	0
										GW09_PFC1_sc49	Stem cells	GW09_PFC1_sc49	142.64	9.84
										GW09_PFC1_sc50	Stem cells	GW09_PFC1_sc50	0	0
										GW09_PFC1_sc51	Stem cells	GW09_PFC1_sc51	64.16	21.39
										GW09_PFC1_sc52	GABAergic neurons	GW09_PFC1_sc52	0	586.69
										GW09_PFC1_sc53	Stem cells	GW09_PFC1_sc53	172.29	38.9
										GW09_PFC1_sc54	Neurons	GW09_PFC1_sc54	22.41	0
										GW09_PFC1_sc55	Stem cells	GW09_PFC1_sc55	882.56	0
										GW09_PFC1_sc56	Neurons	GW09_PFC1_sc56	1.89	51.06
										GW09_PFC1_sc57	Neurons	GW09_PFC1_sc57	0	9.32
										GW09_PFC1_sc58	Neurons	GW09_PFC1_sc58	0	0
										GW09_PFC1_sc59	Neurons	GW09_PFC1_sc59	0	18.15
										GW09_PFC1_sc60	GABAergic neurons	GW09_PFC1_sc60	0	0
										GW09_PFC1_sc61	Neurons	GW09_PFC1_sc61	0	250.77
										GW09_PFC1_sc62	Stem cells	GW09_PFC1_sc62	310.05	6.74
										GW09_PFC1_sc63	Stem cells	GW09_PFC1_sc63	7.46	201.34
										GW09_PFC1_sc64	Stem cells	GW09_PFC1_sc64	1362.21	0
										GW09_PFC1_sc65	Stem cells	GW09_PFC1_sc65	0	9.4
										GW09_PFC1_sc66	Stem cells	GW09_PFC1_sc66	0	194.53
										GW09_PFC1_sc67	Stem cells	GW09_PFC1_sc67	341.91	0
										GW09_PFC1_sc68	Neurons	GW09_PFC1_sc68	9.81	0
										GW09_PFC1_sc69	Neurons	GW09_PFC1_sc69	0	2.02
										GW09_PFC1_sc70	Neurons	GW09_PFC1_sc70	0	0
										GW09_PFC1_sc71	Stem cells	GW09_PFC1_sc71	0	0
										GW09_PFC1_sc72	Stem cells	GW09_PFC1_sc72	0	53.59
										GW09_PFC1_sc73	Neurons	GW09_PFC1_sc73	74.83	0
										GW09_PFC1_sc74	Stem cells	GW09_PFC1_sc74	71.41	71.41
										GW09_PFC1_sc75	Stem cells	GW09_PFC1_sc75	0	5.65
										GW09_PFC1_sc76	Neurons	GW09_PFC1_sc76	0	1.87
										GW09_PFC1_sc77	Stem cells	GW09_PFC1_sc77	8.25	0
										GW09_PFC1_sc78	Neurons	GW09_PFC1_sc78	0	7.22
										GW09_PFC1_sc79	Stem cells	GW09_PFC1_sc79	598.15	14.13
										GW09_PFC1_sc80	Stem cells	GW09_PFC1_sc80	122.89	0
										GW09_PFC1_sc81	Stem cells	GW09_PFC1_sc81	273.69	2.16
										GW09_PFC1_sc82	Stem cells	GW09_PFC1_sc82	0	35.38
										GW09_PFC1_sc83	Stem cells	GW09_PFC1_sc83	35.45	88.62
										GW09_PFC1_sc84	Neurons	GW09_PFC1_sc84	81.63	120.51
										GW09_PFC1_sc85	Stem cells	GW09_PFC1_sc85	3.47	218.62
										GW09_PFC1_sc86	Neurons	GW09_PFC1_sc86	87.98	41.4
										GW09_PFC1_sc87	Stem cells	GW09_PFC1_sc87	1100.32	14.48
										GW09_PFC1_sc88	Stem cells	GW09_PFC1_sc88	131.17	4.23
										GW10_PFC1_sc1	Neurons	GW10_PFC1_sc1	12.95	12.95
										GW10_PFC1_sc2	GABAergic neurons	GW10_PFC1_sc2	0	145.07
										GW10_PFC1_sc3	Neurons	GW10_PFC1_sc3	12.5	156.29
										GW10_PFC1_sc4	Stem cells	GW10_PFC1_sc4	252.61	116.06
										GW10_PFC1_sc5	Neurons	GW10_PFC1_sc5	0	9.15
										GW10_PFC1_sc6	Neurons	GW10_PFC1_sc6	14.43	0
										GW10_PFC1_sc7	Neurons	GW10_PFC1_sc7	41.62	48.55
										GW10_PFC1_sc8	Neurons	GW10_PFC1_sc8	224.64	86.4
										GW10_PFC1_sc9	Neurons	GW10_PFC1_sc9	0	699.4
										GW10_PFC1_sc11	Stem cells	GW10_PFC1_sc11	226.09	135.66
										GW10_PFC1_sc12	Neurons	GW10_PFC1_sc12	0	285.39
										GW10_PFC1_sc13	Neurons	GW10_PFC1_sc13	5.71	0
										GW10_PFC1_sc14	Stem cells	GW10_PFC1_sc14	125.98	7.41
										GW10_PFC1_sc15	Neurons	GW10_PFC1_sc15	0	181.24
										GW10_PFC1_sc16	Neurons	GW10_PFC1_sc16	5.6	145.61
										GW10_PFC1_sc17	Neurons	GW10_PFC1_sc17	70.75	325.46
										GW10_PFC1_sc18	Neurons	GW10_PFC1_sc18	14.08	56.32
										GW10_PFC1_sc19	Stem cells	GW10_PFC1_sc19	432.13	11.68
										GW10_PFC1_sc20	Neurons	GW10_PFC1_sc20	21.77	10.88
										GW10_PFC1_sc21	Neurons	GW10_PFC1_sc21	0	42.69
										GW10_PFC1_sc22	Neurons	GW10_PFC1_sc22	34.71	11.57
										GW10_PFC1_sc24	Stem cells	GW10_PFC1_sc24	31.8	54.93
										GW10_PFC1_sc25	Neurons	GW10_PFC1_sc25	0	172.26
										GW10_PFC1_sc26	Neurons	GW10_PFC1_sc26	0	0
										GW10_PFC1_sc27	Neurons	GW10_PFC1_sc27	0	26.99
										GW10_PFC1_sc28	Stem cells	GW10_PFC1_sc28	623.86	0
										GW10_PFC1_sc29	Stem cells	GW10_PFC1_sc29	0	8
										GW10_PFC1_sc30	Stem cells	GW10_PFC1_sc30	178.82	0
										GW10_PFC1_sc31	Stem cells	GW10_PFC1_sc31	150.5	0
										GW10_PFC1_sc32	Stem cells	GW10_PFC1_sc32	202.25	10.11
										GW10_PFC1_sc33	Neurons	GW10_PFC1_sc33	0	218.98
										GW10_PFC1_sc34	Neurons	GW10_PFC1_sc34	2.93	0
										GW10_PFC1_sc35	Neurons	GW10_PFC1_sc35	0	0
										GW10_PFC1_sc36	Neurons	GW10_PFC1_sc36	0	57.09
										GW10_PFC1_sc37	GABAergic neurons	GW10_PFC1_sc37	0	443.89
										GW10_PFC1_sc38	Neurons	GW10_PFC1_sc38	0	0
										GW10_PFC1_sc39	Stem cells	GW10_PFC1_sc39	436.15	186.92
										GW10_PFC1_sc40	Neurons	GW10_PFC1_sc40	0	88.99
										GW10_PFC1_sc41	Neurons	GW10_PFC1_sc41	20.5	51.25
										GW10_PFC1_sc42	Stem cells	GW10_PFC1_sc42	386.01	77.2
										GW10_PFC1_sc43	Neurons	GW10_PFC1_sc43	0	437.89
										GW10_PFC1_sc44	Neurons	GW10_PFC1_sc44	564.75	0
										GW10_PFC1_sc45	Neurons	GW10_PFC1_sc45	0	112.43
										GW10_PFC1_sc46	Stem cells	GW10_PFC1_sc46	140.38	77.21
										GW10_PFC1_sc47	Neurons	GW10_PFC1_sc47	0	0
										GW10_PFC1_sc49	Stem cells	GW10_PFC1_sc49	121.64	111.91
										GW10_PFC1_sc50	Neurons	GW10_PFC1_sc50	0	143.98
										GW10_PFC2_sc1	Stem cells	GW10_PFC2_sc1	0	392.69
										GW10_PFC2_sc2	Neurons	GW10_PFC2_sc2	53.46	104.69
										GW10_PFC2_sc3	Stem cells	GW10_PFC2_sc3	379.25	135.45
										GW10_PFC2_sc4	Neurons	GW10_PFC2_sc4	58.33	87.49
										GW10_PFC2_sc5	Stem cells	GW10_PFC2_sc5	126.96	253.93
										GW10_PFC2_sc6	Neurons	GW10_PFC2_sc6	0	5.54
										GW10_PFC2_sc8	Stem cells	GW10_PFC2_sc8	56.49	225.97
										GW10_PFC2_sc9	Neurons	GW10_PFC2_sc9	206.12	107.67
										GW10_PFC2_sc10	Neurons	GW10_PFC2_sc10	0	307.78
										GW10_PFC2_sc11	Stem cells	GW10_PFC2_sc11	0	231.17
										GW10_PFC2_sc12	Neurons	GW10_PFC2_sc12	4.89	107.57
										GW10_PFC2_sc13	Stem cells	GW10_PFC2_sc13	137.4	0
										GW10_PFC2_sc14	Neurons	GW10_PFC2_sc14	0	285.45
										GW10_PFC2_sc15	Neurons	GW10_PFC2_sc15	6.83	81.94
										GW10_PFC2_sc17	Neurons	GW10_PFC2_sc17	0	0
										GW10_PFC2_sc19	Stem cells	GW10_PFC2_sc19	66.08	9.44
										GW10_PFC2_sc20	Neurons	GW10_PFC2_sc20	356.69	439.92
										GW10_PFC2_sc21	Neurons	GW10_PFC2_sc21	0	83.1
										GW10_PFC2_sc22	Neurons	GW10_PFC2_sc22	0	487.15
										GW10_PFC2_sc23	Neurons	GW10_PFC2_sc23	186.67	154.49
										GW10_PFC2_sc24	Neurons	GW10_PFC2_sc24	0	127.12
										GW10_PFC2_sc25	Neurons	GW10_PFC2_sc25	582.93	0
										GW10_PFC2_sc26	GABAergic neurons	GW10_PFC2_sc26	0	0
										GW10_PFC2_sc27	Neurons	GW10_PFC2_sc27	0	349.55
										GW10_PFC2_sc29	Neurons	GW10_PFC2_sc29	426.84	158.54
										GW10_PFC2_sc30	Stem cells	GW10_PFC2_sc30	50.77	152.32
										GW10_PFC2_sc31	Stem cells	GW10_PFC2_sc31	267.86	101.57
										GW10_PFC2_sc32	Stem cells	GW10_PFC2_sc32	329.31	141.13
										GW10_PFC2_sc33	Stem cells	GW10_PFC2_sc33	156.21	51.53
										GW10_PFC2_sc34	Stem cells	GW10_PFC2_sc34	255.46	212.56
										GW10_PFC2_sc35	Stem cells	GW10_PFC2_sc35	117.45	114.27
										GW10_PFC2_sc36	Stem cells	GW10_PFC2_sc36	12.02	0
										GW10_PFC2_sc37	Stem cells	GW10_PFC2_sc37	318.58	0
										GW10_PFC2_sc38	Stem cells	GW10_PFC2_sc38	63.41	5.51
										GW10_PFC2_sc39	Stem cells	GW10_PFC2_sc39	220.48	51.44
										GW10_PFC2_sc40	Stem cells	GW10_PFC2_sc40	57.26	151.86
										GW10_PFC2_sc41	Neurons	GW10_PFC2_sc41	0	7.73
										GW10_PFC2_sc42	Stem cells	GW10_PFC2_sc42	0	25.89
										GW10_PFC2_sc43	Stem cells	GW10_PFC2_sc43	0	0
										GW10_PFC2_sc44	Stem cells	GW10_PFC2_sc44	0	0
										GW10_PFC2_sc45	Stem cells	GW10_PFC2_sc45	48.55	14.94
										GW10_PFC2_sc46	Stem cells	GW10_PFC2_sc46	281.17	7.21
										GW10_PFC2_sc47	Stem cells	GW10_PFC2_sc47	142.64	81.51
										GW10_PFC2_sc48	Stem cells	GW10_PFC2_sc48	291.3	151.47
										GW10_PFC2_sc49	Neurons	GW10_PFC2_sc49	0	4.8
										GW10_PFC2_sc50	Stem cells	GW10_PFC2_sc50	871.91	705.83
										GW10_PFC2_sc51	Stem cells	GW10_PFC2_sc51	3.26	162.79
										GW10_PFC2_sc52	Neurons	GW10_PFC2_sc52	0	0
										GW10_PFC2_sc53	Neurons	GW10_PFC2_sc53	122.85	0
										GW10_PFC2_sc54	Stem cells	GW10_PFC2_sc54	20.52	73.3
										GW10_PFC2_sc56	Neurons	GW10_PFC2_sc56	331.14	14.61
										GW10_PFC2_sc57	Neurons	GW10_PFC2_sc57	96.29	240.72
										GW10_PFC2_sc58	Stem cells	GW10_PFC2_sc58	222.27	92.89
										GW10_PFC2_sc59	Stem cells	GW10_PFC2_sc59	180.62	5.31
										GW10_PFC2_sc60	Stem cells	GW10_PFC2_sc60	9.57	0
										GW10_PFC2_sc61	Neurons	GW10_PFC2_sc61	24.9	0
										GW10_PFC2_sc62	Stem cells	GW10_PFC2_sc62	24.11	93.01
										GW10_PFC2_sc63	Stem cells	GW10_PFC2_sc63	0	152.02
										GW10_PFC2_sc64	Neurons	GW10_PFC2_sc64	0	3.21
										GW10_PFC2_sc65	Stem cells	GW10_PFC2_sc65	49.76	103.34
										GW10_PFC2_sc66	Stem cells	GW10_PFC2_sc66	57.92	382.29
										GW10_PFC2_sc67	Neurons	GW10_PFC2_sc67	0	139.83
										GW10_PFC2_sc68	Neurons	GW10_PFC2_sc68	75.14	0
										GW10_PFC2_sc69	Stem cells	GW10_PFC2_sc69	120.95	74.71
										GW10_PFC2_sc70	Stem cells	GW10_PFC2_sc70	4.37	2.18
										GW10_PFC2_sc71	Neurons	GW10_PFC2_sc71	2.89	0
										GW10_PFC2_sc72	Neurons	GW10_PFC2_sc72	556.64	31.36
										GW10_PFC2_sc73	GABAergic neurons	GW10_PFC2_sc73	544.63	43.57
										GW10_PFC2_sc74	Neurons	GW10_PFC2_sc74	22.94	109.69
										GW10_PFC2_sc75	Neurons	GW10_PFC2_sc75	85.42	0
										GW10_PFC2_sc76	Stem cells	GW10_PFC2_sc76	0	0
										GW10_PFC2_sc77	Neurons	GW10_PFC2_sc77	7.53	233.55
										GW10_PFC2_sc78	Stem cells	GW10_PFC2_sc78	187.58	18.76
										GW10_PFC2_sc79	Stem cells	GW10_PFC2_sc79	607.42	352.03
										GW10_PFC2_sc80	Neurons	GW10_PFC2_sc80	213.07	348.36
										GW10_PFC2_sc81	Neurons	GW10_PFC2_sc81	0	0
										GW10_PFC2_sc82	Neurons	GW10_PFC2_sc82	5.44	146.76
										GW10_PFC2_sc83	Neurons	GW10_PFC2_sc83	0	14.7
										GW10_PFC2_sc84	Neurons	GW10_PFC2_sc84	0	0
										GW10_PFC2_sc85	Neurons	GW10_PFC2_sc85	0	0
										GW10_PFC2_sc86	Neurons	GW10_PFC2_sc86	3.81	0
										GW10_PFC2_sc87	Neurons	GW10_PFC2_sc87	193.57	0
										GW10_PFC2_sc88	GABAergic neurons	GW10_PFC2_sc88	0	0
										GW10_PFC2_sc89	Neurons	GW10_PFC2_sc89	47.74	13.02
										GW10_PFC2_sc91	GABAergic neurons	GW10_PFC2_sc91	25.37	12.68
										GW10_PFC2_sc92	Stem cells	GW10_PFC2_sc92	186.25	805.88
										GW10_PFC2_sc93	Neurons	GW10_PFC2_sc93	856.87	206.02
										GW10_PFC2_sc94	Neurons	GW10_PFC2_sc94	803.43	152.83
										GW10_PFC2_sc95	Stem cells	GW10_PFC2_sc95	0	0
										GW10_PFC2_sc96	Neurons	GW10_PFC2_sc96	12.6	6.3
										GW10_PFC3_sc1	Stem cells	GW10_PFC3_sc1	192.34	12.82
										GW10_PFC3_sc2	GABAergic neurons	GW10_PFC3_sc2	0	0
										GW10_PFC3_sc3	Neurons	GW10_PFC3_sc3	6.91	307.71
										GW10_PFC3_sc4	Stem cells	GW10_PFC3_sc4	0	0
										GW10_PFC3_sc5	Neurons	GW10_PFC3_sc5	67.2	158.12
										GW10_PFC3_sc6	Neurons	GW10_PFC3_sc6	289.48	385.09
										GW10_PFC3_sc7	Neurons	GW10_PFC3_sc7	3.66	168.21
										GW10_PFC3_sc8	Neurons	GW10_PFC3_sc8	1.27	125.38
										GW10_PFC3_sc9	Stem cells	GW10_PFC3_sc9	123.74	223.69
										GW10_PFC3_sc10	Neurons	GW10_PFC3_sc10	0	15.06
										GW10_PFC3_sc11	Neurons	GW10_PFC3_sc11	16.77	16.77
										GW10_PFC3_sc12	Stem cells	GW10_PFC3_sc12	159.06	226.27
										GW10_PFC3_sc13	Stem cells	GW10_PFC3_sc13	0	4.86
										GW10_PFC3_sc14	Neurons	GW10_PFC3_sc14	122.58	122.58
										GW10_PFC3_sc15	Stem cells	GW10_PFC3_sc15	5.09	5.09
										GW10_PFC3_sc16	Neurons	GW10_PFC3_sc16	0	290.19
										GW10_PFC3_sc17	Stem cells	GW10_PFC3_sc17	91.8	30.6
										GW10_PFC3_sc18	Stem cells	GW10_PFC3_sc18	10.52	0
										GW10_PFC3_sc19	Stem cells	GW10_PFC3_sc19	8.77	0
										GW10_PFC3_sc20	Stem cells	GW10_PFC3_sc20	113.73	9.48
										GW10_PFC3_sc21	Stem cells	GW10_PFC3_sc21	201	440.55
										GW10_PFC3_sc22	Neurons	GW10_PFC3_sc22	7.65	0
										GW10_PFC3_sc23	Stem cells	GW10_PFC3_sc23	13.68	13.68
										GW10_PFC3_sc24	Neurons	GW10_PFC3_sc24	2.71	0
										GW10_PFC3_sc25	Neurons	GW10_PFC3_sc25	280.41	42.89
										GW10_PFC3_sc26	Stem cells	GW10_PFC3_sc26	73.22	98.56
										GW10_PFC3_sc27	Neurons	GW10_PFC3_sc27	81.57	63.72
										GW10_PFC3_sc28	Neurons	GW10_PFC3_sc28	5.53	5.53
										GW10_PFC3_sc29	Neurons	GW10_PFC3_sc29	84.04	143.17
										GW10_PFC3_sc30	Stem cells	GW10_PFC3_sc30	3.29	121.59
										GW10_PFC3_sc32	Neurons	GW10_PFC3_sc32	2.48	96.54
										GW10_PFC3_sc33	Neurons	GW10_PFC3_sc33	7.33	7.33
										GW10_PFC3_sc34	Stem cells	GW10_PFC3_sc34	40.25	241.49
										GW10_PFC3_sc35	Stem cells	GW10_PFC3_sc35	57.86	56.87
										GW10_PFC3_sc36	Stem cells	GW10_PFC3_sc36	266.5	67.68
										GW10_PFC3_sc37	Stem cells	GW10_PFC3_sc37	13.98	2.8
										GW10_PFC3_sc38	Neurons	GW10_PFC3_sc38	1.26	1.26
										GW10_PFC3_sc39	Stem cells	GW10_PFC3_sc39	215.63	18.92
										GW10_PFC3_sc40	Stem cells	GW10_PFC3_sc40	319.92	0
										GW10_PFC3_sc41	Stem cells	GW10_PFC3_sc41	390.05	107.6
										GW10_PFC3_sc42	Stem cells	GW10_PFC3_sc42	32.9	281.97
										GW10_PFC3_sc43	Stem cells	GW10_PFC3_sc43	7.94	95.27
										GW10_PFC3_sc44	Stem cells	GW10_PFC3_sc44	484.66	6.41
										GW10_PFC3_sc45	Stem cells	GW10_PFC3_sc45	165.32	379.78
										GW10_PFC3_sc46	Stem cells	GW10_PFC3_sc46	0	0
										GW10_PFC3_sc47	Stem cells	GW10_PFC3_sc47	3.06	186.78
										GW10_PFC3_sc48	Stem cells	GW10_PFC3_sc48	11.87	71.22
										GW10_PFC2_sc16	Microglia	GW10_PFC2_sc16	115.84	93.57
										GW10_PFC2_sc42	Microglia	GW10_PFC2_sc42	0	25.89
										GW12_PFC1_sc1	Neurons	GW12_PFC1_sc1	4.9	112.74
										GW12_PFC1_sc2	GABAergic neurons	GW12_PFC1_sc2	37.98	265.84
										GW12_PFC1_sc3	Neurons	GW12_PFC1_sc3	3.08	206.44
										GW12_PFC1_sc4	Neurons	GW12_PFC1_sc4	28.26	59.34
										GW12_PFC1_sc5	Neurons	GW12_PFC1_sc5	0	46.33
										GW12_PFC1_sc6	Stem cells	GW12_PFC1_sc6	0	24.5
										GW12_PFC1_sc7	Neurons	GW12_PFC1_sc7	0	0
										GW12_PFC1_sc8	Neurons	GW12_PFC1_sc8	0	950.57
										GW12_PFC1_sc9	Stem cells	GW12_PFC1_sc9	4.54	31.81
										GW12_PFC1_sc10	Stem cells	GW12_PFC1_sc10	14.97	348.15
										GW12_PFC1_sc11	Neurons	GW12_PFC1_sc11	72	115.2
										GW12_PFC1_sc12	Neurons	GW12_PFC1_sc12	0	166.08
										GW12_PFC1_sc13	Neurons	GW12_PFC1_sc13	180.83	93.15
										GW12_PFC1_sc14	Stem cells	GW12_PFC1_sc14	0	195.4
										GW12_PFC1_sc15	Neurons	GW12_PFC1_sc15	0	57.64
										GW12_PFC1_sc16	GABAergic neurons	GW12_PFC1_sc16	0	36.71
										GW12_PFC1_sc17	Neurons	GW12_PFC1_sc17	28.36	194.99
										GW12_PFC1_sc18	Stem cells	GW12_PFC1_sc18	297.15	69.92
										GW12_PFC1_sc19	Neurons	GW12_PFC1_sc19	97.84	24.46
										GW12_PFC1_sc20	Stem cells	GW12_PFC1_sc20	0	14.49
										GW12_PFC1_sc21	Neurons	GW12_PFC1_sc21	0	65.14
										GW12_PFC1_sc22	Neurons	GW12_PFC1_sc22	5.05	515.54
										GW12_PFC1_sc24	Neurons	GW12_PFC1_sc24	0	4.18
										GW12_PFC1_sc25	Neurons	GW12_PFC1_sc25	177.77	294.73
										GW12_PFC1_sc26	Neurons	GW12_PFC1_sc26	0	1011.35
										GW12_PFC1_sc27	Stem cells	GW12_PFC1_sc27	0	327.39
										GW12_PFC1_sc28	Stem cells	GW12_PFC1_sc28	30.8	67.76
										GW12_PFC1_sc29	Neurons	GW12_PFC1_sc29	0	270.97
										GW12_PFC1_sc30	Neurons	GW12_PFC1_sc30	0	0
										GW12_PFC1_sc31	Neurons	GW12_PFC1_sc31	21.36	0
										GW12_PFC1_sc32	Neurons	GW12_PFC1_sc32	0	147.8
										GW12_PFC1_sc33	Neurons	GW12_PFC1_sc33	0	253.6
										GW12_PFC1_sc35	Stem cells	GW12_PFC1_sc35	90.16	32.79
										GW12_PFC1_sc36	Neurons	GW12_PFC1_sc36	3.28	127.76
										GW12_PFC1_sc37	Neurons	GW12_PFC1_sc37	0	0
										GW12_PFC1_sc38	Neurons	GW12_PFC1_sc38	0	311.27
										GW12_PFC1_sc39	Neurons	GW12_PFC1_sc39	0	102
										GW12_PFC1_sc40	Stem cells	GW12_PFC1_sc40	39.11	72.2
										GW12_PFC1_sc41	Neurons	GW12_PFC1_sc41	91.34	105.18
										GW12_PFC1_sc42	OPC	GW12_PFC1_sc42	232.55	119.55
										GW12_PFC1_sc43	Stem cells	GW12_PFC1_sc43	177.81	3.07
										GW12_PFC1_sc44	GABAergic neurons	GW12_PFC1_sc44	483.95	0
										GW12_PFC1_sc45	Neurons	GW12_PFC1_sc45	0	106.74
										GW12_PFC1_sc46	Neurons	GW12_PFC1_sc46	0	154.94
										GW12_PFC1_sc47	Neurons	GW12_PFC1_sc47	8.68	112.86
										GW12_PFC1_sc48	Neurons	GW12_PFC1_sc48	0	285.61
										GW12_PFC1_sc49	Neurons	GW12_PFC1_sc49	6.27	0
										GW12_PFC1_sc50	Neurons	GW12_PFC1_sc50	42.48	169.93
										GW12_PFC1_sc51	Neurons	GW12_PFC1_sc51	4.32	4.32
										GW12_PFC1_sc52	Neurons	GW12_PFC1_sc52	4.86	4.86
										GW12_PFC1_sc53	Neurons	GW12_PFC1_sc53	0	0
										GW12_PFC1_sc54	Neurons	GW12_PFC1_sc54	0	5.43
										GW12_PFC1_sc56	Neurons	GW12_PFC1_sc56	0	45.78
										GW12_PFC1_sc57	Neurons	GW12_PFC1_sc57	5.98	5.98
										GW12_PFC1_sc58	Neurons	GW12_PFC1_sc58	0	9.28
										GW12_PFC1_sc59	Neurons	GW12_PFC1_sc59	0	0
										GW12_PFC1_sc60	Stem cells	GW12_PFC1_sc60	0	11.87
										GW12_PFC1_sc61	GABAergic neurons	GW12_PFC1_sc61	0	9.91
										GW12_PFC1_sc62	Neurons	GW12_PFC1_sc62	0	0
										GW12_PFC1_sc63	Neurons	GW12_PFC1_sc63	7.94	484.54
										GW12_PFC1_sc64	Neurons	GW12_PFC1_sc64	0	397.68
										GW12_PFC1_sc65	Neurons	GW12_PFC1_sc65	0	501.44
										GW12_PFC1_sc67	Neurons	GW12_PFC1_sc67	0	0
										GW12_PFC1_sc68	Neurons	GW12_PFC1_sc68	0	0
										GW12_PFC1_sc69	Neurons	GW12_PFC1_sc69	0	0
										GW12_PFC1_sc70	Neurons	GW12_PFC1_sc70	0	0
										GW12_PFC1_sc71	Neurons	GW12_PFC1_sc71	0	21.61
										GW12_PFC1_sc72	Neurons	GW12_PFC1_sc72	0	11.23
										GW12_PFC1_sc73	GABAergic neurons	GW12_PFC1_sc73	0	733.59
										GW12_PFC1_sc74	Neurons	GW12_PFC1_sc74	0	0
										GW12_PFC1_sc75	GABAergic neurons	GW12_PFC1_sc75	0	191.71
										GW12_PFC1_sc76	Neurons	GW12_PFC1_sc76	0	0
										GW12_PFC1_sc77	Neurons	GW12_PFC1_sc77	0	129.85
										GW12_PFC1_sc78	Neurons	GW12_PFC1_sc78	0	8.52
										GW12_PFC1_sc79	Neurons	GW12_PFC1_sc79	0	0
										GW12_PFC1_sc81	Neurons	GW12_PFC1_sc81	143.78	0
										GW12_PFC1_sc82	Neurons	GW12_PFC1_sc82	3.96	395.55
										GW12_PFC1_sc83	OPC	GW12_PFC1_sc83	94.36	5.9
										GW12_PFC1_sc84	Neurons	GW12_PFC1_sc84	0	0
										GW12_PFC1_sc85	Neurons	GW12_PFC1_sc85	0	0
										GW12_PFC1_sc87	Neurons	GW12_PFC1_sc87	0	19.43
										GW12_PFC1_sc88	Neurons	GW12_PFC1_sc88	16.11	0
										GW12_PFC1_sc89	Neurons	GW12_PFC1_sc89	0	0
										GW12_PFC1_sc90	GABAergic neurons	GW12_PFC1_sc90	0	0
										GW12_PFC1_sc55	Microglia	GW12_PFC1_sc55	89.67	199.72
										GW13_PFC1_sc1	Neurons	GW13_PFC1_sc1	14.53	261.62
										GW13_PFC1_sc2	Stem cells	GW13_PFC1_sc2	16.8	403.24
										GW13_PFC1_sc3	Neurons	GW13_PFC1_sc3	5.3	243.94
										GW13_PFC1_sc4	Neurons	GW13_PFC1_sc4	238.37	780.12
										GW13_PFC1_sc5	Neurons	GW13_PFC1_sc5	4.87	257.87
										GW13_PFC1_sc6	Neurons	GW13_PFC1_sc6	13.76	185.8
										GW13_PFC1_sc7	Neurons	GW13_PFC1_sc7	45.74	118.93
										GW13_PFC1_sc8	Stem cells	GW13_PFC1_sc8	125.67	0
										GW13_PFC1_sc9	Neurons	GW13_PFC1_sc9	3.85	0
										GW13_PFC1_sc10	Neurons	GW13_PFC1_sc10	0	0
										GW13_PFC1_sc11	Stem cells	GW13_PFC1_sc11	160.14	124.55
										GW13_PFC1_sc13	Stem cells	GW13_PFC1_sc13	101.61	0
										GW13_PFC1_sc14	Neurons	GW13_PFC1_sc14	30.71	0
										GW13_PFC1_sc15	Neurons	GW13_PFC1_sc15	7.26	0
										GW13_PFC1_sc16	Neurons	GW13_PFC1_sc16	4.93	222.07
										GW13_PFC1_sc17	Stem cells	GW13_PFC1_sc17	266.94	94.21
										GW13_PFC1_sc18	Stem cells	GW13_PFC1_sc18	55.09	133.79
										GW13_PFC1_sc19	Neurons	GW13_PFC1_sc19	4.55	4.55
										GW13_PFC1_sc20	Neurons	GW13_PFC1_sc20	0	0
										GW13_PFC1_sc21	Neurons	GW13_PFC1_sc21	0	712.27
										GW13_PFC1_sc22	Neurons	GW13_PFC1_sc22	13.05	19.57
										GW13_PFC1_sc24	Stem cells	GW13_PFC1_sc24	134.27	7.46
										GW13_PFC1_sc25	Neurons	GW13_PFC1_sc25	5.43	5.43
										GW13_PFC1_sc12	Microglia	GW13_PFC1_sc12	21.01	0
										GW16_PFC1_B2_sc2	Neurons	GW16_PFC1_B2_sc2	4.06	117.69
										GW16_PFC1_B2_sc4	Neurons	GW16_PFC1_B2_sc4	240.28	50.94
										GW16_PFC1_B2_sc5	Neurons	GW16_PFC1_B2_sc5	46.52	89.16
										GW16_PFC1_B2_sc6	Stem cells	GW16_PFC1_B2_sc6	64.86	74.84
										GW16_PFC1_B2_sc7	Stem cells	GW16_PFC1_B2_sc7	87.98	79.05
										GW16_PFC1_B2_sc8	Neurons	GW16_PFC1_B2_sc8	207.51	45.11
										GW16_PFC1_B2_sc9	Neurons	GW16_PFC1_B2_sc9	0	0
										GW16_PFC1_B2_sc10	Neurons	GW16_PFC1_B2_sc10	320.38	0
										GW16_PFC1_B2_sc11	Neurons	GW16_PFC1_B2_sc11	0	0
										GW16_PFC1_B2_sc12	Stem cells	GW16_PFC1_B2_sc12	16.21	16.21
										GW16_PFC1_B2_sc13	Neurons	GW16_PFC1_B2_sc13	0	226.55
										GW16_PFC1_B2_sc14	GABAergic neurons	GW16_PFC1_B2_sc14	0	0
										GW16_PFC1_B2_sc15	Neurons	GW16_PFC1_B2_sc15	14.08	0
										GW16_PFC1_B2_sc16	Neurons	GW16_PFC1_B2_sc16	19.84	277.74
										GW16_PFC1_B2_sc17	Neurons	GW16_PFC1_B2_sc17	0	10.42
										GW16_PFC1_B2_sc18	Neurons	GW16_PFC1_B2_sc18	6.59	6.59
										GW16_PFC1_B2_sc19	Neurons	GW16_PFC1_B2_sc19	0	0
										GW16_PFC1_B2_sc20	Neurons	GW16_PFC1_B2_sc20	0	0
										GW16_PFC1_B2_sc21	Neurons	GW16_PFC1_B2_sc21	0	13.69
										GW16_PFC1_B2_sc22	Neurons	GW16_PFC1_B2_sc22	0	15.38
										GW16_PFC1_B2_sc23	Neurons	GW16_PFC1_B2_sc23	0	0
										GW16_PFC1_B2_sc24	Neurons	GW16_PFC1_B2_sc24	0	0
										GW16_PFC1_B1_sc1	Neurons	GW16_PFC1_B1_sc1	13.67	287.01
										GW16_PFC1_B1_sc2	Neurons	GW16_PFC1_B1_sc2	0	45.87
										GW16_PFC1_B1_sc3	Neurons	GW16_PFC1_B1_sc3	0	737.44
										GW16_PFC1_B1_sc4	Neurons	GW16_PFC1_B1_sc4	0	80.69
										GW16_PFC1_B1_sc5	Neurons	GW16_PFC1_B1_sc5	8.96	0
										GW16_PFC1_B1_sc6	Neurons	GW16_PFC1_B1_sc6	581.59	116.32
										GW16_PFC1_B1_sc7	Neurons	GW16_PFC1_B1_sc7	269.03	31.04
										GW16_PFC1_B1_sc8	Neurons	GW16_PFC1_B1_sc8	0	724.13
										GW16_PFC1_B1_sc9	Neurons	GW16_PFC1_B1_sc9	30.71	485.21
										GW16_PFC1_B1_sc10	Neurons	GW16_PFC1_B1_sc10	0	4.2
										GW16_PFC1_B1_sc11	Neurons	GW16_PFC1_B1_sc11	0	122.27
										GW16_PFC1_B1_sc12	Neurons	GW16_PFC1_B1_sc12	35.09	4.39
										GW16_PFC1_B1_sc13	Neurons	GW16_PFC1_B1_sc13	8.98	26.93
										GW16_PFC1_B1_sc14	Stem cells	GW16_PFC1_B1_sc14	0	6.6
										GW16_PFC1_B1_sc15	Neurons	GW16_PFC1_B1_sc15	0	0
										GW16_PFC1_B1_sc16	Neurons	GW16_PFC1_B1_sc16	0	3.17
										GW16_PFC1_B1_sc17	Neurons	GW16_PFC1_B1_sc17	0	147.87
										GW16_PFC1_B1_sc18	Neurons	GW16_PFC1_B1_sc18	249.61	7.56
										GW16_PFC1_B1_sc20	Neurons	GW16_PFC1_B1_sc20	0	6.57
										GW16_PFC1_B1_sc21	Neurons	GW16_PFC1_B1_sc21	6	0
										GW16_PFC1_B1_sc22	Neurons	GW16_PFC1_B1_sc22	0	3.84
										GW16_PFC1_B1_sc24	Neurons	GW16_PFC1_B1_sc24	4.44	0
										GW16_PFC1_B4_sc1	Neurons	GW16_PFC1_B4_sc1	10.68	496.6
										GW16_PFC1_B4_sc2	Neurons	GW16_PFC1_B4_sc2	12.74	237.89
										GW16_PFC1_B4_sc3	Neurons	GW16_PFC1_B4_sc3	476.63	289.84
										GW16_PFC1_B4_sc4	Neurons	GW16_PFC1_B4_sc4	25.23	109.31
										GW16_PFC1_B4_sc5	Neurons	GW16_PFC1_B4_sc5	0	0
										GW16_PFC1_B4_sc6	Neurons	GW16_PFC1_B4_sc6	60.76	0
										GW16_PFC1_B4_sc7	Stem cells	GW16_PFC1_B4_sc7	0	0
										GW16_PFC1_B4_sc8	Neurons	GW16_PFC1_B4_sc8	132.35	0
										GW16_PFC1_B4_sc9	GABAergic neurons	GW16_PFC1_B4_sc9	7.1	7.1
										GW16_PFC1_B4_sc10	Neurons	GW16_PFC1_B4_sc10	46.75	31.17
										GW16_PFC1_B4_sc11	Neurons	GW16_PFC1_B4_sc11	0	0
										GW16_PFC1_B4_sc12	Stem cells	GW16_PFC1_B4_sc12	0	518.82
										GW16_PFC1_B4_sc14	GABAergic neurons	GW16_PFC1_B4_sc14	0	0
										GW16_PFC1_B4_sc15	Neurons	GW16_PFC1_B4_sc15	372.28	77.4
										GW16_PFC1_B4_sc16	Neurons	GW16_PFC1_B4_sc16	8.37	221.89
										GW16_PFC1_B4_sc17	Stem cells	GW16_PFC1_B4_sc17	18.06	0
										GW16_PFC1_B4_sc18	Stem cells	GW16_PFC1_B4_sc18	67.74	2.95
										GW16_PFC1_B4_sc19	Neurons	GW16_PFC1_B4_sc19	0	385.17
										GW16_PFC1_B4_sc20	Stem cells	GW16_PFC1_B4_sc20	0	14.88
										GW16_PFC1_B4_sc21	Stem cells	GW16_PFC1_B4_sc21	14.41	7.2
										GW16_PFC1_B4_sc22	Neurons	GW16_PFC1_B4_sc22	5.17	0
										GW16_PFC1_B4_sc23	Stem cells	GW16_PFC1_B4_sc23	195.13	0
										GW16_PFC1_B4_sc24	Stem cells	GW16_PFC1_B4_sc24	2.76	2.76
										GW16_PFC1_B3_sc1	Neurons	GW16_PFC1_B3_sc1	0	89.15
										GW16_PFC1_B3_sc2	Neurons	GW16_PFC1_B3_sc2	166.76	100.06
										GW16_PFC1_B3_sc3	Neurons	GW16_PFC1_B3_sc3	6.94	6.94
										GW16_PFC1_B3_sc4	Stem cells	GW16_PFC1_B3_sc4	3.48	6.95
										GW16_PFC1_B3_sc5	Stem cells	GW16_PFC1_B3_sc5	95.77	21.28
										GW16_PFC1_B3_sc6	Neurons	GW16_PFC1_B3_sc6	6.42	57.79
										GW16_PFC1_B3_sc7	Neurons	GW16_PFC1_B3_sc7	0	27.72
										GW16_PFC1_B3_sc8	Stem cells	GW16_PFC1_B3_sc8	64.04	38.42
										GW16_PFC1_B3_sc9	Stem cells	GW16_PFC1_B3_sc9	11.51	518.03
										GW16_PFC1_B3_sc10	Neurons	GW16_PFC1_B3_sc10	5.23	392.22
										GW16_PFC1_B3_sc11	Neurons	GW16_PFC1_B3_sc11	0	91.74
										GW16_PFC1_B3_sc12	Neurons	GW16_PFC1_B3_sc12	29.97	458.17
										GW16_PFC1_B3_sc13	Neurons	GW16_PFC1_B3_sc13	0	413.56
										GW16_PFC1_B3_sc14	Neurons	GW16_PFC1_B3_sc14	172.9	172.9
										GW16_PFC1_B3_sc15	Neurons	GW16_PFC1_B3_sc15	0	97.58
										GW16_PFC1_B3_sc16	Neurons	GW16_PFC1_B3_sc16	0	0
										GW16_PFC1_A1_sc1	Neurons	GW16_PFC1_A1_sc1	2.35	72.84
										GW16_PFC1_A1_sc2	Neurons	GW16_PFC1_A1_sc2	245.38	93.38
										GW16_PFC1_A1_sc3	Neurons	GW16_PFC1_A1_sc3	125.04	12.5
										GW16_PFC1_A1_sc4	Stem cells	GW16_PFC1_A1_sc4	9.11	18.23
										GW16_PFC1_A1_sc5	Neurons	GW16_PFC1_A1_sc5	6.68	500.75
										GW16_PFC1_A1_sc6	Stem cells	GW16_PFC1_A1_sc6	0	43.09
										GW16_PFC1_A1_sc7	GABAergic neurons	GW16_PFC1_A1_sc7	0	113.51
										GW16_PFC1_A1_sc8	Neurons	GW16_PFC1_A1_sc8	0	60.14
										GW16_PFC1_A1_sc9	Neurons	GW16_PFC1_A1_sc9	84.85	21.72
										GW16_PFC1_A1_sc10	Stem cells	GW16_PFC1_A1_sc10	200.95	6.18
										GW16_PFC1_A1_sc11	GABAergic neurons	GW16_PFC1_A1_sc11	0	52.18
										GW16_PFC1_A1_sc12	Stem cells	GW16_PFC1_A1_sc12	56.41	18.8
										GW16_PFC1_A1_sc13	Neurons	GW16_PFC1_A1_sc13	34.64	17.32
										GW16_PFC1_A1_sc14	Neurons	GW16_PFC1_A1_sc14	0	20.59
										GW16_PFC1_A1_sc15	Neurons	GW16_PFC1_A1_sc15	0	24.92
										GW16_PFC1_A1_sc16	Neurons	GW16_PFC1_A1_sc16	5.19	62.22
										GW16_PFC1_A1_sc17	GABAergic neurons	GW16_PFC1_A1_sc17	349.55	19.42
										GW16_PFC1_A1_sc18	Neurons	GW16_PFC1_A1_sc18	6.88	57.32
										GW16_PFC1_A1_sc19	Stem cells	GW16_PFC1_A1_sc19	150.92	66.03
										GW16_PFC1_A1_sc20	Neurons	GW16_PFC1_A1_sc20	6.36	0
										GW16_PFC1_A1_sc21	Neurons	GW16_PFC1_A1_sc21	44.14	16.05
										GW16_PFC1_A1_sc22	Neurons	GW16_PFC1_A1_sc22	129.56	136.03
										GW16_PFC1_A1_sc23	Stem cells	GW16_PFC1_A1_sc23	212.88	25.05
										GW16_PFC1_A1_sc24	Neurons	GW16_PFC1_A1_sc24	6.62	278.13
										GW16_PFC1_E1_sc1	Neurons	GW16_PFC1_E1_sc1	4.39	17.57
										GW16_PFC1_E1_sc2	Neurons	GW16_PFC1_E1_sc2	5.25	21.01
										GW16_PFC1_E1_sc3	Neurons	GW16_PFC1_E1_sc3	4.33	47.62
										GW16_PFC1_E1_sc4	Neurons	GW16_PFC1_E1_sc4	200.25	8.34
										GW16_PFC1_E1_sc5	GABAergic neurons	GW16_PFC1_E1_sc5	0	558.35
										GW16_PFC1_E1_sc6	GABAergic neurons	GW16_PFC1_E1_sc6	0	324.99
										GW16_PFC1_E1_sc7	Neurons	GW16_PFC1_E1_sc7	0	140.55
										GW16_PFC1_E1_sc8	Neurons	GW16_PFC1_E1_sc8	2.79	78.01
										GW16_PFC1_E1_sc9	Neurons	GW16_PFC1_E1_sc9	0	7.61
										GW16_PFC1_E1_sc10	Neurons	GW16_PFC1_E1_sc10	2.91	69.82
										GW16_PFC1_E1_sc11	Neurons	GW16_PFC1_E1_sc11	4.23	980.24
										GW16_PFC1_E1_sc12	Neurons	GW16_PFC1_E1_sc12	0	87.92
										GW16_PFC1_E1_sc13	Neurons	GW16_PFC1_E1_sc13	103.05	115.62
										GW16_PFC1_E1_sc14	Neurons	GW16_PFC1_E1_sc14	51.01	119.77
										GW16_PFC1_E1_sc15	Neurons	GW16_PFC1_E1_sc15	791.9	7.13
										GW16_PFC1_E1_sc16	Neurons	GW16_PFC1_E1_sc16	5.31	10.63
										GW16_PFC1_E1_sc17	Neurons	GW16_PFC1_E1_sc17	0	11.28
										GW16_PFC1_E1_sc18	GABAergic neurons	GW16_PFC1_E1_sc18	0	6.94
										GW16_PFC1_E1_sc19	Neurons	GW16_PFC1_E1_sc19	0	0
										GW16_PFC1_E1_sc20	Neurons	GW16_PFC1_E1_sc20	325.15	228.48
										GW16_PFC1_E1_sc21	GABAergic neurons	GW16_PFC1_E1_sc21	5.29	264.39
										GW16_PFC1_E1_sc22	Neurons	GW16_PFC1_E1_sc22	0	72.56
										GW16_PFC1_E1_sc23	Neurons	GW16_PFC1_E1_sc23	10.15	20.29
										GW16_PFC1_E1_sc24	Neurons	GW16_PFC1_E1_sc24	0	11.23
										GW16_PFC1_A3_sc1	Stem cells	GW16_PFC1_A3_sc1	127.83	43.46
										GW16_PFC1_A3_sc2	Neurons	GW16_PFC1_A3_sc2	18.99	12.66
										GW16_PFC1_A3_sc3	Neurons	GW16_PFC1_A3_sc3	38.21	54.58
										GW16_PFC1_A3_sc4	Neurons	GW16_PFC1_A3_sc4	594.81	12.52
										GW16_PFC1_A3_sc5	Neurons	GW16_PFC1_A3_sc5	5.6	11.2
										GW16_PFC1_A3_sc6	Neurons	GW16_PFC1_A3_sc6	0	215.74
										GW16_PFC1_A3_sc7	Neurons	GW16_PFC1_A3_sc7	0	148.19
										GW16_PFC1_A3_sc8	Stem cells	GW16_PFC1_A3_sc8	24.02	7.2
										GW16_PFC1_A3_sc9	Neurons	GW16_PFC1_A3_sc9	188.74	0
										GW16_PFC1_A3_sc10	Stem cells	GW16_PFC1_A3_sc10	7.12	21.36
										GW16_PFC1_A3_sc11	Neurons	GW16_PFC1_A3_sc11	35.99	0
										GW16_PFC1_A3_sc12	Neurons	GW16_PFC1_A3_sc12	0	210.14
										GW16_PFC1_A3_sc13	Neurons	GW16_PFC1_A3_sc13	0	7.49
										GW16_PFC1_A3_sc14	Neurons	GW16_PFC1_A3_sc14	0	17.92
										GW16_PFC1_A3_sc15	Neurons	GW16_PFC1_A3_sc15	6.82	20.45
										GW16_PFC1_A3_sc16	Stem cells	GW16_PFC1_A3_sc16	26.74	184.51
										GW16_PFC1_A3_sc17	Neurons	GW16_PFC1_A3_sc17	0	0
										GW16_PFC1_A3_sc18	Neurons	GW16_PFC1_A3_sc18	4.83	314.09
										GW16_PFC1_A3_sc19	Neurons	GW16_PFC1_A3_sc19	7.08	14.15
										GW16_PFC1_A3_sc20	Neurons	GW16_PFC1_A3_sc20	120.89	9.67
										GW16_PFC1_A3_sc21	Stem cells	GW16_PFC1_A3_sc21	8.38	326.89
										GW16_PFC1_A3_sc22	Neurons	GW16_PFC1_A3_sc22	0	7.21
										GW16_PFC1_A3_sc23	GABAergic neurons	GW16_PFC1_A3_sc23	38.65	0
										GW16_PFC1_A3_sc24	Stem cells	GW16_PFC1_A3_sc24	141.45	3.82
										GW16_PFC1_A2_sc1	Neurons	GW16_PFC1_A2_sc1	159.38	50.33
										GW16_PFC1_A2_sc2	Neurons	GW16_PFC1_A2_sc2	0	82.3
										GW16_PFC1_A2_sc3	Neurons	GW16_PFC1_A2_sc3	0	43.73
										GW16_PFC1_A2_sc4	GABAergic neurons	GW16_PFC1_A2_sc4	0	466.42
										GW16_PFC1_A2_sc5	Neurons	GW16_PFC1_A2_sc5	7.41	22.24
										GW16_PFC1_A2_sc6	Neurons	GW16_PFC1_A2_sc6	0	164.48
										GW16_PFC1_A2_sc7	GABAergic neurons	GW16_PFC1_A2_sc7	0	29.08
										GW16_PFC1_A2_sc8	GABAergic neurons	GW16_PFC1_A2_sc8	0	127.61
										GW16_PFC1_A2_sc9	Neurons	GW16_PFC1_A2_sc9	0	242.34
										GW16_PFC1_A2_sc10	Neurons	GW16_PFC1_A2_sc10	8.34	58.38
										GW16_PFC1_A2_sc12	GABAergic neurons	GW16_PFC1_A2_sc12	0	61.13
										GW16_PFC1_A2_sc13	GABAergic neurons	GW16_PFC1_A2_sc13	0	36.91
										GW16_PFC1_A2_sc14	Neurons	GW16_PFC1_A2_sc14	0	42.21
										GW16_PFC1_A2_sc15	Neurons	GW16_PFC1_A2_sc15	5.54	146.77
										GW16_PFC1_A2_sc16	Neurons	GW16_PFC1_A2_sc16	0	608.02
										GW16_PFC1_E4_sc1	Neurons	GW16_PFC1_E4_sc1	0	498.66
										GW16_PFC1_E4_sc2	Neurons	GW16_PFC1_E4_sc2	24.09	126.49
										GW16_PFC1_E4_sc3	Neurons	GW16_PFC1_E4_sc3	46.06	56.89
										GW16_PFC1_E4_sc4	GABAergic neurons	GW16_PFC1_E4_sc4	124.23	372.7
										GW16_PFC1_E4_sc5	Neurons	GW16_PFC1_E4_sc5	282.34	73.65
										GW16_PFC1_E4_sc6	Neurons	GW16_PFC1_E4_sc6	48.11	248.58
										GW16_PFC1_E4_sc7	Neurons	GW16_PFC1_E4_sc7	3.72	78.02
										GW16_PFC1_E4_sc8	Neurons	GW16_PFC1_E4_sc8	80.8	265.49
										GW16_PFC1_E4_sc9	Neurons	GW16_PFC1_E4_sc9	11.42	3.81
										GW16_PFC1_E4_sc10	Neurons	GW16_PFC1_E4_sc10	41.41	127.41
										GW16_PFC1_E4_sc11	OPC	GW16_PFC1_E4_sc11	49.46	12.36
										GW16_PFC1_E4_sc13	Neurons	GW16_PFC1_E4_sc13	28.72	533.33
										GW16_PFC1_E4_sc14	Neurons	GW16_PFC1_E4_sc14	183.28	140.52
										GW16_PFC1_E4_sc15	GABAergic neurons	GW16_PFC1_E4_sc15	0	55.88
										GW16_PFC1_E4_sc16	Neurons	GW16_PFC1_E4_sc16	19.56	143.46
										GW16_PFC1_E4_sc17	Neurons	GW16_PFC1_E4_sc17	272.89	49.12
										GW16_PFC1_E4_sc18	Neurons	GW16_PFC1_E4_sc18	260.74	39.11
										GW16_PFC1_E4_sc19	Neurons	GW16_PFC1_E4_sc19	674.64	31.53
										GW16_PFC1_E4_sc20	Neurons	GW16_PFC1_E4_sc20	121.49	99.4
										GW16_PFC1_E4_sc21	Neurons	GW16_PFC1_E4_sc21	0	605.39
										GW16_PFC1_E4_sc22	Neurons	GW16_PFC1_E4_sc22	25.23	12.61
										GW16_PFC1_E4_sc23	GABAergic neurons	GW16_PFC1_E4_sc23	0	1183.36
										GW16_PFC1_E4_sc24	Neurons	GW16_PFC1_E4_sc24	0	828.07
										GW16_PFC1_E3_sc1	Neurons	GW16_PFC1_E3_sc1	3.26	120.61
										GW16_PFC1_E3_sc2	Neurons	GW16_PFC1_E3_sc2	0	15.57
										GW16_PFC1_E3_sc3	Neurons	GW16_PFC1_E3_sc3	395.25	267.37
										GW16_PFC1_E3_sc4	Neurons	GW16_PFC1_E3_sc4	109.61	29.41
										GW16_PFC1_E3_sc5	Neurons	GW16_PFC1_E3_sc5	33.59	263.12
										GW16_PFC1_E3_sc6	GABAergic neurons	GW16_PFC1_E3_sc6	0	68.62
										GW16_PFC1_E3_sc7	Neurons	GW16_PFC1_E3_sc7	5.95	219.98
										GW16_PFC1_E3_sc8	Neurons	GW16_PFC1_E3_sc8	50.8	63.06
										GW16_PFC1_E3_sc9	GABAergic neurons	GW16_PFC1_E3_sc9	0	46.97
										GW16_PFC1_E3_sc10	Neurons	GW16_PFC1_E3_sc10	143.88	152.34
										GW16_PFC1_E3_sc11	Neurons	GW16_PFC1_E3_sc11	62.04	132.6
										GW16_PFC1_E3_sc12	Neurons	GW16_PFC1_E3_sc12	125.5	86.68
										GW16_PFC1_E3_sc13	GABAergic neurons	GW16_PFC1_E3_sc13	5.31	204.49
										GW16_PFC1_E3_sc14	Stem cells	GW16_PFC1_E3_sc14	68.37	430.35
										GW16_PFC1_E3_sc15	Neurons	GW16_PFC1_E3_sc15	6.31	167.14
										GW16_PFC1_E3_sc16	Neurons	GW16_PFC1_E3_sc16	149.99	24.19
										GW16_PFC1_E3_sc17	GABAergic neurons	GW16_PFC1_E3_sc17	52.04	236.16
										GW16_PFC1_E3_sc18	Neurons	GW16_PFC1_E3_sc18	0	225.6
										GW16_PFC1_E3_sc19	Neurons	GW16_PFC1_E3_sc19	49.31	345.2
										GW16_PFC1_E3_sc20	Neurons	GW16_PFC1_E3_sc20	0	8.05
										GW16_PFC1_E3_sc21	Stem cells	GW16_PFC1_E3_sc21	0	9.19
										GW16_PFC1_E3_sc22	Neurons	GW16_PFC1_E3_sc22	0	110.19
										GW16_PFC1_E3_sc23	OPC	GW16_PFC1_E3_sc23	301.01	11.69
										GW16_PFC1_E3_sc24	Stem cells	GW16_PFC1_E3_sc24	2.84	124.9
										GW16_PFC1_E2_sc1	Neurons	GW16_PFC1_E2_sc1	16.07	107.15
										GW16_PFC1_E2_sc2	Neurons	GW16_PFC1_E2_sc2	31.13	102.74
										GW16_PFC1_E2_sc3	Neurons	GW16_PFC1_E2_sc3	109.89	71.76
										GW16_PFC1_E2_sc4	Neurons	GW16_PFC1_E2_sc4	113.29	417.13
										GW16_PFC1_E2_sc5	Neurons	GW16_PFC1_E2_sc5	0	199.86
										GW16_PFC1_E2_sc6	Neurons	GW16_PFC1_E2_sc6	112.45	77.85
										GW16_PFC1_E2_sc7	Neurons	GW16_PFC1_E2_sc7	36.59	53.8
										GW16_PFC1_E2_sc8	Neurons	GW16_PFC1_E2_sc8	95.36	10.31
										GW16_PFC1_E2_sc9	GABAergic neurons	GW16_PFC1_E2_sc9	0	37.17
										GW16_PFC1_E2_sc10	GABAergic neurons	GW16_PFC1_E2_sc10	0	189.31
										GW16_PFC1_E2_sc11	Neurons	GW16_PFC1_E2_sc11	8.34	183.44
										GW16_PFC1_E2_sc12	Neurons	GW16_PFC1_E2_sc12	32.18	109.12
										GW16_PFC1_E2_sc13	Neurons	GW16_PFC1_E2_sc13	5.51	156.99
										GW16_PFC1_E2_sc14	Neurons	GW16_PFC1_E2_sc14	0	366.77
										GW16_PFC1_E2_sc15	Stem cells	GW16_PFC1_E2_sc15	51.91	186.27
										GW16_PFC1_E2_sc16	Neurons	GW16_PFC1_E2_sc16	1.67	185.57
										GW16_PFC1_E2_sc17	Neurons	GW16_PFC1_E2_sc17	5.77	17.32
										GW16_PFC1_E2_sc18	Neurons	GW16_PFC1_E2_sc18	5.63	16.89
										GW16_PFC1_E2_sc19	Neurons	GW16_PFC1_E2_sc19	9.05	18.09
										GW16_PFC1_E2_sc20	Neurons	GW16_PFC1_E2_sc20	0	60.51
										GW16_PFC1_E2_sc21	Neurons	GW16_PFC1_E2_sc21	140.64	342.42
										GW16_PFC1_E2_sc22	Neurons	GW16_PFC1_E2_sc22	11.54	0
										GW16_PFC1_E2_sc23	Stem cells	GW16_PFC1_E2_sc23	0	293.52
										GW16_PFC1_E2_sc24	Neurons	GW16_PFC1_E2_sc24	5.09	297.77
										GW16_PFC1_L4_sc1	OPC	GW16_PFC1_L4_sc1	83.79	316.54
										GW16_PFC1_L4_sc2	Neurons	GW16_PFC1_L4_sc2	46.29	462.86
										GW16_PFC1_L4_sc3	Neurons	GW16_PFC1_L4_sc3	10.03	666.74
										GW16_PFC1_L4_sc4	Stem cells	GW16_PFC1_L4_sc4	74.74	7.47
										GW16_PFC1_L4_sc5	Neurons	GW16_PFC1_L4_sc5	66.81	11.13
										GW16_PFC1_L4_sc6	Neurons	GW16_PFC1_L4_sc6	6.26	175.23
										GW16_PFC1_L4_sc7	Neurons	GW16_PFC1_L4_sc7	243.44	35.28
										GW16_PFC1_L4_sc8	Neurons	GW16_PFC1_L4_sc8	0	51.39
										GW16_PFC1_L4_sc9	Neurons	GW16_PFC1_L4_sc9	118.77	325.77
										GW16_PFC1_L4_sc10	Neurons	GW16_PFC1_L4_sc10	117.7	83.63
										GW16_PFC1_L4_sc11	Neurons	GW16_PFC1_L4_sc11	44.67	558.38
										GW16_PFC1_L4_sc12	Stem cells	GW16_PFC1_L4_sc12	78.82	11.49
										GW16_PFC1_L4_sc13	Neurons	GW16_PFC1_L4_sc13	3.11	195.64
										GW16_PFC1_L4_sc14	Stem cells	GW16_PFC1_L4_sc14	79.71	140.66
										GW16_PFC1_L4_sc15	Neurons	GW16_PFC1_L4_sc15	47.34	129.22
										GW16_PFC1_L4_sc16	Neurons	GW16_PFC1_L4_sc16	64.82	140.92
										GW16_PFC1_D3_sc1	Neurons	GW16_PFC1_D3_sc1	81.23	178.7
										GW16_PFC1_D3_sc2	Neurons	GW16_PFC1_D3_sc2	22.66	141.63
										GW16_PFC1_D3_sc3	Neurons	GW16_PFC1_D3_sc3	815.88	36.26
										GW16_PFC1_D3_sc4	Stem cells	GW16_PFC1_D3_sc4	192.03	6
										GW16_PFC1_D3_sc5	Neurons	GW16_PFC1_D3_sc5	0	188.98
										GW16_PFC1_D3_sc6	Neurons	GW16_PFC1_D3_sc6	0	384.49
										GW16_PFC1_D3_sc7	Neurons	GW16_PFC1_D3_sc7	1.62	138.94
										GW16_PFC1_D3_sc8	Stem cells	GW16_PFC1_D3_sc8	185.17	57.87
										GW16_PFC1_D3_sc9	Neurons	GW16_PFC1_D3_sc9	2.49	236.66
										GW16_PFC1_D3_sc10	Neurons	GW16_PFC1_D3_sc10	0	368.11
										GW16_PFC1_D3_sc11	Neurons	GW16_PFC1_D3_sc11	0	21.9
										GW16_PFC1_D3_sc12	Neurons	GW16_PFC1_D3_sc12	19.48	584.34
										GW16_PFC1_D3_sc13	Neurons	GW16_PFC1_D3_sc13	7.42	111.29
										GW16_PFC1_D3_sc14	Stem cells	GW16_PFC1_D3_sc14	301.05	437.23
										GW16_PFC1_D3_sc15	Neurons	GW16_PFC1_D3_sc15	8.62	43.12
										GW16_PFC1_D3_sc16	Stem cells	GW16_PFC1_D3_sc16	79.94	126.96
										GW16_PFC1_D3_sc17	Neurons	GW16_PFC1_D3_sc17	9.22	295.08
										GW16_PFC1_D3_sc18	Neurons	GW16_PFC1_D3_sc18	7.75	7.75
										GW16_PFC1_D3_sc19	Neurons	GW16_PFC1_D3_sc19	87.34	77.63
										GW16_PFC1_D3_sc20	Neurons	GW16_PFC1_D3_sc20	0	10.47
										GW16_PFC1_D3_sc21	Neurons	GW16_PFC1_D3_sc21	0	18.2
										GW16_PFC1_D3_sc22	OPC	GW16_PFC1_D3_sc22	147.2	9.6
										GW16_PFC1_D3_sc23	Neurons	GW16_PFC1_D3_sc23	231.81	11.31
										GW16_PFC1_D3_sc24	Neurons	GW16_PFC1_D3_sc24	55.99	9.33
										GW16_PFC1_D4_sc2	OPC	GW16_PFC1_D4_sc2	31.69	31.69
										GW16_PFC1_D4_sc3	Neurons	GW16_PFC1_D4_sc3	17.2	137.57
										GW16_PFC1_D4_sc4	Neurons	GW16_PFC1_D4_sc4	15.59	15.59
										GW16_PFC1_D4_sc5	Neurons	GW16_PFC1_D4_sc5	349.73	63.59
										GW16_PFC1_D4_sc6	Neurons	GW16_PFC1_D4_sc6	13.04	534.76
										GW16_PFC1_D4_sc7	Neurons	GW16_PFC1_D4_sc7	273.92	9.78
										GW16_PFC1_D4_sc8	Neurons	GW16_PFC1_D4_sc8	0	15.35
										GW16_PFC1_D4_sc9	Neurons	GW16_PFC1_D4_sc9	0	213.62
										GW16_PFC1_D4_sc10	Neurons	GW16_PFC1_D4_sc10	0	148.13
										GW16_PFC1_D4_sc11	Stem cells	GW16_PFC1_D4_sc11	36.3	0
										GW16_PFC1_D4_sc12	Neurons	GW16_PFC1_D4_sc12	0	0
										GW16_PFC1_D4_sc13	Neurons	GW16_PFC1_D4_sc13	294.03	147.02
										GW16_PFC1_D4_sc14	GABAergic neurons	GW16_PFC1_D4_sc14	0	712.72
										GW16_PFC1_D4_sc15	Stem cells	GW16_PFC1_D4_sc15	246.62	306.69
										GW16_PFC1_D4_sc16	Neurons	GW16_PFC1_D4_sc16	0	0
										GW16_PFC1_D4_sc18	Neurons	GW16_PFC1_D4_sc18	83.7	560.12
										GW16_PFC1_D4_sc19	OPC	GW16_PFC1_D4_sc19	5.97	5.97
										GW16_PFC1_D4_sc20	Neurons	GW16_PFC1_D4_sc20	20.5	0
										GW16_PFC1_D4_sc21	Neurons	GW16_PFC1_D4_sc21	10.23	0
										GW16_PFC1_D4_sc22	Neurons	GW16_PFC1_D4_sc22	6.27	501.79
										GW16_PFC1_D4_sc23	Stem cells	GW16_PFC1_D4_sc23	55.98	55.98
										GW16_PFC1_D4_sc24	Stem cells	GW16_PFC1_D4_sc24	94.45	63.82
										GW16_PFC1_VL2_sc1	GABAergic neurons	GW16_PFC1_VL2_sc1	0	36.36
										GW16_PFC1_VL2_sc2	OPC	GW16_PFC1_VL2_sc2	0	82.4
										GW16_PFC1_VL2_sc3	Neurons	GW16_PFC1_VL2_sc3	24.02	120.12
										GW16_PFC1_VL2_sc4	GABAergic neurons	GW16_PFC1_VL2_sc4	0	852.23
										GW16_PFC1_VL2_sc5	Neurons	GW16_PFC1_VL2_sc5	0	10.65
										GW16_PFC1_VL2_sc6	Stem cells	GW16_PFC1_VL2_sc6	0	15.01
										GW16_PFC1_VL2_sc7	Neurons	GW16_PFC1_VL2_sc7	4.84	411.53
										GW16_PFC1_VL2_sc8	Neurons	GW16_PFC1_VL2_sc8	0	160.17
										GW16_PFC1_VL2_sc9	Stem cells	GW16_PFC1_VL2_sc9	228.88	21.46
										GW16_PFC1_VL2_sc10	GABAergic neurons	GW16_PFC1_VL2_sc10	0	0
										GW16_PFC1_VL2_sc12	GABAergic neurons	GW16_PFC1_VL2_sc12	0	134.41
										GW16_PFC1_VL2_sc13	Stem cells	GW16_PFC1_VL2_sc13	0	0
										GW16_PFC1_VL2_sc14	Neurons	GW16_PFC1_VL2_sc14	0	859.52
										GW16_PFC1_VL2_sc15	GABAergic neurons	GW16_PFC1_VL2_sc15	0	0
										GW16_PFC1_VL2_sc16	Neurons	GW16_PFC1_VL2_sc16	6.78	115.3
										GW16_PFC1_VL2_sc17	Neurons	GW16_PFC1_VL2_sc17	0	4.01
										GW16_PFC1_VL2_sc18	Neurons	GW16_PFC1_VL2_sc18	33.4	25.05
										GW16_PFC1_VL2_sc19	GABAergic neurons	GW16_PFC1_VL2_sc19	6.68	6.68
										GW16_PFC1_VL2_sc20	Neurons	GW16_PFC1_VL2_sc20	27.83	44.52
										GW16_PFC1_VL2_sc21	Neurons	GW16_PFC1_VL2_sc21	0	19.76
										GW16_PFC1_VL2_sc22	Neurons	GW16_PFC1_VL2_sc22	5.94	0
										GW16_PFC1_VL2_sc23	Neurons	GW16_PFC1_VL2_sc23	0	73.1
										GW16_PFC1_VL2_sc24	GABAergic neurons	GW16_PFC1_VL2_sc24	0	148.37
										GW16_PFC1_VL3_sc1	Neurons	GW16_PFC1_VL3_sc1	77.27	31.46
										GW16_PFC1_VL3_sc2	Neurons	GW16_PFC1_VL3_sc2	78.76	15.75
										GW16_PFC1_VL3_sc3	Neurons	GW16_PFC1_VL3_sc3	0	6.88
										GW16_PFC1_VL3_sc4	Neurons	GW16_PFC1_VL3_sc4	44.5	98.24
										GW16_PFC1_VL3_sc5	Neurons	GW16_PFC1_VL3_sc5	1.68	157.82
										GW16_PFC1_VL3_sc6	Neurons	GW16_PFC1_VL3_sc6	11.63	146.53
										GW16_PFC1_VL3_sc7	Neurons	GW16_PFC1_VL3_sc7	1.96	31.42
										GW16_PFC1_VL3_sc8	Neurons	GW16_PFC1_VL3_sc8	3.61	125.1
										GW16_PFC1_VL3_sc9	Neurons	GW16_PFC1_VL3_sc9	0	211.03
										GW16_PFC1_VL3_sc10	Neurons	GW16_PFC1_VL3_sc10	338.93	352.91
										GW16_PFC1_VL3_sc11	Neurons	GW16_PFC1_VL3_sc11	38.69	33.16
										GW16_PFC1_VL3_sc12	Stem cells	GW16_PFC1_VL3_sc12	109.54	18.26
										GW16_PFC1_VL3_sc13	Neurons	GW16_PFC1_VL3_sc13	20.18	112.99
										GW16_PFC1_VL3_sc14	Neurons	GW16_PFC1_VL3_sc14	0	7.7
										GW16_PFC1_VL3_sc15	Neurons	GW16_PFC1_VL3_sc15	14.28	154.21
										GW16_PFC1_VL3_sc16	Neurons	GW16_PFC1_VL3_sc16	126.84	25.94
										GW16_PFC1_F3_sc1	Neurons	GW16_PFC1_F3_sc1	3	482.39
										GW16_PFC1_F3_sc2	Neurons	GW16_PFC1_F3_sc2	160.13	178.75
										GW16_PFC1_F3_sc3	Neurons	GW16_PFC1_F3_sc3	125.84	282.62
										GW16_PFC1_F3_sc5	Neurons	GW16_PFC1_F3_sc5	15.8	89.52
										GW16_PFC1_F3_sc6	Neurons	GW16_PFC1_F3_sc6	0	189.75
										GW16_PFC1_F3_sc7	Neurons	GW16_PFC1_F3_sc7	0	77.23
										GW16_PFC1_F3_sc8	OPC	GW16_PFC1_F3_sc8	5.39	91.56
										GW16_PFC1_F3_sc9	Neurons	GW16_PFC1_F3_sc9	0	53.01
										GW16_PFC1_F3_sc10	Neurons	GW16_PFC1_F3_sc10	0	71.76
										GW16_PFC1_F3_sc11	Neurons	GW16_PFC1_F3_sc11	7.33	417.81
										GW16_PFC1_F3_sc12	Neurons	GW16_PFC1_F3_sc12	0	59.29
										GW16_PFC1_F3_sc13	Neurons	GW16_PFC1_F3_sc13	0	29.26
										GW16_PFC1_F3_sc14	Stem cells	GW16_PFC1_F3_sc14	15.78	78.91
										GW16_PFC1_F3_sc15	Neurons	GW16_PFC1_F3_sc15	11.98	23.95
										GW16_PFC1_F3_sc16	Stem cells	GW16_PFC1_F3_sc16	376.22	0
										GW16_PFC1_F3_sc17	Neurons	GW16_PFC1_F3_sc17	52.41	4.76
										GW16_PFC1_F3_sc18	Neurons	GW16_PFC1_F3_sc18	74.17	15.62
										GW16_PFC1_F3_sc19	Neurons	GW16_PFC1_F3_sc19	9.49	336.86
										GW16_PFC1_F3_sc20	Neurons	GW16_PFC1_F3_sc20	4.54	249.71
										GW16_PFC1_F3_sc21	Neurons	GW16_PFC1_F3_sc21	143.33	28.67
										GW16_PFC1_F3_sc22	Neurons	GW16_PFC1_F3_sc22	217.83	34.85
										GW16_PFC1_F3_sc23	Stem cells	GW16_PFC1_F3_sc23	11.28	304.44
										GW16_PFC1_F3_sc24	Neurons	GW16_PFC1_F3_sc24	0	173.67
										GW16_PFC1_F4_sc1	Neurons	GW16_PFC1_F4_sc1	233.12	258.09
										GW16_PFC1_F4_sc2	Stem cells	GW16_PFC1_F4_sc2	416.61	160.24
										GW16_PFC1_F4_sc3	Neurons	GW16_PFC1_F4_sc3	5.89	123.65
										GW16_PFC1_F4_sc4	Neurons	GW16_PFC1_F4_sc4	42.06	7.01
										GW16_PFC1_F4_sc5	Neurons	GW16_PFC1_F4_sc5	72.19	877.42
										GW16_PFC1_F4_sc6	Neurons	GW16_PFC1_F4_sc6	0	231.26
										GW16_PFC1_F4_sc7	Neurons	GW16_PFC1_F4_sc7	6.06	442.64
										GW16_PFC1_F4_sc8	Stem cells	GW16_PFC1_F4_sc8	10.36	176.15
										GW16_PFC1_F4_sc9	Neurons	GW16_PFC1_F4_sc9	0	14.68
										GW16_PFC1_F4_sc10	Neurons	GW16_PFC1_F4_sc10	0	11.2
										GW16_PFC1_F4_sc11	Stem cells	GW16_PFC1_F4_sc11	59.21	0
										GW16_PFC1_F4_sc12	Stem cells	GW16_PFC1_F4_sc12	4.39	219.5
										GW16_PFC1_F4_sc13	Neurons	GW16_PFC1_F4_sc13	17.19	17.19
										GW16_PFC1_F4_sc14	Neurons	GW16_PFC1_F4_sc14	265.85	192.32
										GW16_PFC1_F4_sc15	Neurons	GW16_PFC1_F4_sc15	0	166.75
										GW16_PFC1_F4_sc16	Neurons	GW16_PFC1_F4_sc16	103.94	141.73
										GW16_PFC1_F4_sc17	Stem cells	GW16_PFC1_F4_sc17	158.5	219.02
										GW16_PFC1_F4_sc18	Neurons	GW16_PFC1_F4_sc18	0	0
										GW16_PFC1_F4_sc19	Neurons	GW16_PFC1_F4_sc19	178.05	44.51
										GW16_PFC1_F4_sc20	Neurons	GW16_PFC1_F4_sc20	0	0
										GW16_PFC1_F4_sc21	Neurons	GW16_PFC1_F4_sc21	0	0
										GW16_PFC1_F4_sc22	Neurons	GW16_PFC1_F4_sc22	0	265.39
										GW16_PFC1_F4_sc23	GABAergic neurons	GW16_PFC1_F4_sc23	8.91	8.91
										GW16_PFC1_F4_sc24	Neurons	GW16_PFC1_F4_sc24	81.61	90.68
										GW16_PFC1_F1_sc1	Neurons	GW16_PFC1_F1_sc1	2.64	235.19
										GW16_PFC1_F1_sc2	Neurons	GW16_PFC1_F1_sc2	0	359.49
										GW16_PFC1_F1_sc3	Neurons	GW16_PFC1_F1_sc3	0	158.9
										GW16_PFC1_F1_sc4	Neurons	GW16_PFC1_F1_sc4	4.53	9.05
										GW16_PFC1_F1_sc5	Neurons	GW16_PFC1_F1_sc5	2.62	26.2
										GW16_PFC1_F1_sc6	Neurons	GW16_PFC1_F1_sc6	0	272.95
										GW16_PFC1_F1_sc7	Neurons	GW16_PFC1_F1_sc7	0	6.79
										GW16_PFC1_F1_sc8	Neurons	GW16_PFC1_F1_sc8	245.94	103.55
										GW16_PFC1_F1_sc9	Neurons	GW16_PFC1_F1_sc9	2.97	154.4
										GW16_PFC1_F1_sc10	Neurons	GW16_PFC1_F1_sc10	0	0
										GW16_PFC1_F1_sc11	Neurons	GW16_PFC1_F1_sc11	0	558.21
										GW16_PFC1_F1_sc12	Neurons	GW16_PFC1_F1_sc12	4.04	105
										GW16_PFC1_F1_sc13	GABAergic neurons	GW16_PFC1_F1_sc13	0	0
										GW16_PFC1_F1_sc14	GABAergic neurons	GW16_PFC1_F1_sc14	0	607.92
										GW16_PFC1_F1_sc15	Neurons	GW16_PFC1_F1_sc15	5.31	164.53
										GW16_PFC1_F1_sc16	Stem cells	GW16_PFC1_F1_sc16	2.31	6.93
										GW16_PFC1_F1_sc17	GABAergic neurons	GW16_PFC1_F1_sc17	28.62	7.16
										GW16_PFC1_F1_sc18	Neurons	GW16_PFC1_F1_sc18	3.14	226.21
										GW16_PFC1_F1_sc19	GABAergic neurons	GW16_PFC1_F1_sc19	211.99	0
										GW16_PFC1_F1_sc20	Neurons	GW16_PFC1_F1_sc20	15.49	30.98
										GW16_PFC1_F1_sc21	Neurons	GW16_PFC1_F1_sc21	16.95	542.46
										GW16_PFC1_F1_sc22	Neurons	GW16_PFC1_F1_sc22	0	14.44
										GW16_PFC1_F1_sc23	Neurons	GW16_PFC1_F1_sc23	16.03	0
										GW16_PFC1_F1_sc24	Neurons	GW16_PFC1_F1_sc24	0	143.86
										GW16_PFC1_A4_sc1	Neurons	GW16_PFC1_A4_sc1	0	180.37
										GW16_PFC1_A4_sc2	Stem cells	GW16_PFC1_A4_sc2	352.72	0
										GW16_PFC1_A4_sc3	Neurons	GW16_PFC1_A4_sc3	5.92	11.83
										GW16_PFC1_A4_sc4	Neurons	GW16_PFC1_A4_sc4	4.02	748.27
										GW16_PFC1_A4_sc5	Neurons	GW16_PFC1_A4_sc5	0	15.97
										GW16_PFC1_A4_sc6	Stem cells	GW16_PFC1_A4_sc6	242.39	10.1
										GW16_PFC1_A4_sc7	Neurons	GW16_PFC1_A4_sc7	0	33.27
										GW16_PFC1_A4_sc8	Stem cells	GW16_PFC1_A4_sc8	40.75	21.45
										GW16_PFC1_A4_sc9	Stem cells	GW16_PFC1_A4_sc9	190.99	12.73
										GW16_PFC1_A4_sc10	Stem cells	GW16_PFC1_A4_sc10	0	188.62
										GW16_PFC1_A4_sc11	GABAergic neurons	GW16_PFC1_A4_sc11	0	0
										GW16_PFC1_A4_sc12	Neurons	GW16_PFC1_A4_sc12	0	0
										GW16_PFC1_A4_sc13	Neurons	GW16_PFC1_A4_sc13	0	3.7
										GW16_PFC1_A4_sc15	Neurons	GW16_PFC1_A4_sc15	0	0
										GW16_PFC1_A4_sc16	Neurons	GW16_PFC1_A4_sc16	17.65	8.83
										GW16_PFC1_C4_sc1	Neurons	GW16_PFC1_C4_sc1	5.23	177.95
										GW16_PFC1_C4_sc2	GABAergic neurons	GW16_PFC1_C4_sc2	0	36.25
										GW16_PFC1_C4_sc3	Neurons	GW16_PFC1_C4_sc3	0	48.74
										GW16_PFC1_C4_sc4	Neurons	GW16_PFC1_C4_sc4	0	159.25
										GW16_PFC1_C4_sc5	Neurons	GW16_PFC1_C4_sc5	0	578.77
										GW16_PFC1_C4_sc6	GABAergic neurons	GW16_PFC1_C4_sc6	124.32	20.72
										GW16_PFC1_C4_sc7	Neurons	GW16_PFC1_C4_sc7	202.4	0
										GW16_PFC1_C4_sc8	Neurons	GW16_PFC1_C4_sc8	0	154.77
										GW16_PFC1_C4_sc9	GABAergic neurons	GW16_PFC1_C4_sc9	14.23	9.49
										GW16_PFC1_C4_sc10	Neurons	GW16_PFC1_C4_sc10	91.74	21.59
										GW16_PFC1_C4_sc11	Neurons	GW16_PFC1_C4_sc11	0	14.13
										GW16_PFC1_C4_sc12	Neurons	GW16_PFC1_C4_sc12	14.07	126.65
										GW16_PFC1_C4_sc13	Stem cells	GW16_PFC1_C4_sc13	446.83	5.52
										GW16_PFC1_C4_sc14	Neurons	GW16_PFC1_C4_sc14	0	12.15
										GW16_PFC1_C4_sc15	GABAergic neurons	GW16_PFC1_C4_sc15	24.06	336.85
										GW16_PFC1_C4_sc16	GABAergic neurons	GW16_PFC1_C4_sc16	0	0
										GW16_PFC1_C4_sc17	Neurons	GW16_PFC1_C4_sc17	0	483.77
										GW16_PFC1_C4_sc18	Neurons	GW16_PFC1_C4_sc18	29.82	0
										GW16_PFC1_C4_sc19	GABAergic neurons	GW16_PFC1_C4_sc19	59.72	179.17
										GW16_PFC1_C4_sc21	OPC	GW16_PFC1_C4_sc21	0	27.89
										GW16_PFC1_C4_sc22	GABAergic neurons	GW16_PFC1_C4_sc22	70.04	0
										GW16_PFC1_C4_sc23	Neurons	GW16_PFC1_C4_sc23	0	300.31
										GW16_PFC1_C4_sc24	Neurons	GW16_PFC1_C4_sc24	12.98	298.55
										GW16_PFC1_DL1_sc1	GABAergic neurons	GW16_PFC1_DL1_sc1	7.91	221.36
										GW16_PFC1_DL1_sc2	Stem cells	GW16_PFC1_DL1_sc2	286.31	29.62
										GW16_PFC1_DL1_sc3	Stem cells	GW16_PFC1_DL1_sc3	87.49	199.97
										GW16_PFC1_DL1_sc4	Neurons	GW16_PFC1_DL1_sc4	9.01	162.2
										GW16_PFC1_DL1_sc5	GABAergic neurons	GW16_PFC1_DL1_sc5	0	742.11
										GW16_PFC1_DL1_sc6	Neurons	GW16_PFC1_DL1_sc6	342.5	119.87
										GW16_PFC1_DL1_sc7	Stem cells	GW16_PFC1_DL1_sc7	73.71	11.34
										GW16_PFC1_DL1_sc8	Neurons	GW16_PFC1_DL1_sc8	0	12.9
										GW16_PFC1_DL1_sc9	Stem cells	GW16_PFC1_DL1_sc9	229.86	126.97
										GW16_PFC1_DL1_sc10	GABAergic neurons	GW16_PFC1_DL1_sc10	0	85.89
										GW16_PFC1_DL1_sc11	Neurons	GW16_PFC1_DL1_sc11	8.92	17.84
										GW16_PFC1_DL1_sc12	Neurons	GW16_PFC1_DL1_sc12	214.2	187.42
										GW16_PFC1_DL1_sc13	Neurons	GW16_PFC1_DL1_sc13	6.31	50.49
										GW16_PFC1_DL1_sc14	Neurons	GW16_PFC1_DL1_sc14	9.56	172.06
										GW16_PFC1_DL1_sc15	GABAergic neurons	GW16_PFC1_DL1_sc15	0	0
										GW16_PFC1_DL1_sc16	Neurons	GW16_PFC1_DL1_sc16	0	166.12
										GW16_PFC1_DL1_sc17	Stem cells	GW16_PFC1_DL1_sc17	101.91	8.49
										GW16_PFC1_DL1_sc18	Stem cells	GW16_PFC1_DL1_sc18	16.86	172.79
										GW16_PFC1_DL1_sc19	Stem cells	GW16_PFC1_DL1_sc19	145.55	38.62
										GW16_PFC1_DL1_sc20	Stem cells	GW16_PFC1_DL1_sc20	114.89	83.96
										GW16_PFC1_DL1_sc21	Neurons	GW16_PFC1_DL1_sc21	15.73	31.45
										GW16_PFC1_DL1_sc22	Stem cells	GW16_PFC1_DL1_sc22	251.27	74.36
										GW16_PFC1_DL1_sc23	Neurons	GW16_PFC1_DL1_sc23	0	8.13
										GW16_PFC1_DL1_sc24	Neurons	GW16_PFC1_DL1_sc24	0	76.72
										GW16_PFC1_C1_sc1	Neurons	GW16_PFC1_C1_sc1	0	234.06
										GW16_PFC1_C1_sc2	Neurons	GW16_PFC1_C1_sc2	36.29	0
										GW16_PFC1_C1_sc3	Neurons	GW16_PFC1_C1_sc3	121.38	16.34
										GW16_PFC1_C1_sc4	Neurons	GW16_PFC1_C1_sc4	149.22	83.56
										GW16_PFC1_C1_sc5	Neurons	GW16_PFC1_C1_sc5	18.03	86.14
										GW16_PFC1_C1_sc6	Neurons	GW16_PFC1_C1_sc6	68.01	221.53
										GW16_PFC1_C1_sc7	GABAergic neurons	GW16_PFC1_C1_sc7	562.23	6.32
										GW16_PFC1_C1_sc8	Stem cells	GW16_PFC1_C1_sc8	0	5.95
										GW16_PFC1_C1_sc9	Neurons	GW16_PFC1_C1_sc9	6.41	339.63
										GW16_PFC1_C1_sc10	Neurons	GW16_PFC1_C1_sc10	0	95.76
										GW16_PFC1_C1_sc11	Neurons	GW16_PFC1_C1_sc11	0	0
										GW16_PFC1_C1_sc13	Neurons	GW16_PFC1_C1_sc13	0	20.22
										GW16_PFC1_C1_sc14	Neurons	GW16_PFC1_C1_sc14	42.69	103.67
										GW16_PFC1_C1_sc15	Neurons	GW16_PFC1_C1_sc15	13.91	134.42
										GW16_PFC1_C1_sc16	Neurons	GW16_PFC1_C1_sc16	124.1	291.56
										GW16_PFC1_C1_sc17	Neurons	GW16_PFC1_C1_sc17	12.74	161.35
										GW16_PFC1_C1_sc18	GABAergic neurons	GW16_PFC1_C1_sc18	78.18	119.58
										GW16_PFC1_C1_sc19	Stem cells	GW16_PFC1_C1_sc19	103.46	22.49
										GW16_PFC1_C1_sc20	Neurons	GW16_PFC1_C1_sc20	11.89	31.72
										GW16_PFC1_C1_sc21	Stem cells	GW16_PFC1_C1_sc21	550.17	197.23
										GW16_PFC1_C1_sc22	GABAergic neurons	GW16_PFC1_C1_sc22	94.77	29.16
										GW16_PFC1_C1_sc23	Stem cells	GW16_PFC1_C1_sc23	11.02	11.02
										GW16_PFC1_C1_sc24	Neurons	GW16_PFC1_C1_sc24	0	295.68
										GW16_PFC1_C3_sc1	Neurons	GW16_PFC1_C3_sc1	10.59	31.77
										GW16_PFC1_C3_sc2	Stem cells	GW16_PFC1_C3_sc2	125.35	20.89
										GW16_PFC1_C3_sc3	Neurons	GW16_PFC1_C3_sc3	0	246.54
										GW16_PFC1_C3_sc4	Stem cells	GW16_PFC1_C3_sc4	143.22	115.68
										GW16_PFC1_C3_sc5	Neurons	GW16_PFC1_C3_sc5	8.09	105.23
										GW16_PFC1_C3_sc6	Neurons	GW16_PFC1_C3_sc6	149.14	272.33
										GW16_PFC1_C3_sc7	Neurons	GW16_PFC1_C3_sc7	12.51	375.35
										GW16_PFC1_C3_sc8	Neurons	GW16_PFC1_C3_sc8	6.48	116.55
										GW16_PFC1_C3_sc9	Neurons	GW16_PFC1_C3_sc9	0	243.86
										GW16_PFC1_C3_sc10	Stem cells	GW16_PFC1_C3_sc10	379.8	212.33
										GW16_PFC1_C3_sc11	Neurons	GW16_PFC1_C3_sc11	234.82	21.35
										GW16_PFC1_C3_sc12	Neurons	GW16_PFC1_C3_sc12	0	6.25
										GW16_PFC1_C3_sc13	GABAergic neurons	GW16_PFC1_C3_sc13	0	86.25
										GW16_PFC1_C3_sc14	Neurons	GW16_PFC1_C3_sc14	8.78	184.48
										GW16_PFC1_C3_sc15	Neurons	GW16_PFC1_C3_sc15	0	0
										GW16_PFC1_C3_sc16	Neurons	GW16_PFC1_C3_sc16	713.61	23.4
										GW16_PFC1_L1_sc1	Neurons	GW16_PFC1_L1_sc1	140.63	349.19
										GW16_PFC1_L1_sc2	Neurons	GW16_PFC1_L1_sc2	7.16	7.16
										GW16_PFC1_L1_sc3	Stem cells	GW16_PFC1_L1_sc3	9.69	29.08
										GW16_PFC1_L1_sc4	Neurons	GW16_PFC1_L1_sc4	0	9.99
										GW16_PFC1_L1_sc5	Stem cells	GW16_PFC1_L1_sc5	203.35	140.24
										GW16_PFC1_L1_sc6	Neurons	GW16_PFC1_L1_sc6	0	13.05
										GW16_PFC1_L1_sc7	Stem cells	GW16_PFC1_L1_sc7	223.52	11.46
										GW16_PFC1_L1_sc8	Stem cells	GW16_PFC1_L1_sc8	99.98	69.21
										GW16_PFC1_L1_sc9	Stem cells	GW16_PFC1_L1_sc9	167.21	15.2
										GW16_PFC1_L1_sc10	Stem cells	GW16_PFC1_L1_sc10	78.66	80.91
										GW16_PFC1_L1_sc11	Neurons	GW16_PFC1_L1_sc11	0	88
										GW16_PFC1_L1_sc12	Neurons	GW16_PFC1_L1_sc12	0	0
										GW16_PFC1_L1_sc13	Neurons	GW16_PFC1_L1_sc13	0	30.75
										GW16_PFC1_L1_sc14	Neurons	GW16_PFC1_L1_sc14	0	36.13
										GW16_PFC1_L1_sc15	Neurons	GW16_PFC1_L1_sc15	46.88	77.22
										GW16_PFC1_L1_sc16	Neurons	GW16_PFC1_L1_sc16	10.93	32.79
										GW16_PFC1_L1_sc17	Neurons	GW16_PFC1_L1_sc17	7.16	35.78
										GW16_PFC1_L1_sc18	Stem cells	GW16_PFC1_L1_sc18	0	116.18
										GW16_PFC1_L1_sc19	OPC	GW16_PFC1_L1_sc19	13.5	33.74
										GW16_PFC1_L1_sc20	Neurons	GW16_PFC1_L1_sc20	0	59.8
										GW16_PFC1_L1_sc21	Stem cells	GW16_PFC1_L1_sc21	85.66	125.19
										GW16_PFC1_L1_sc22	Stem cells	GW16_PFC1_L1_sc22	0	126.38
										GW16_PFC1_L1_sc23	Neurons	GW16_PFC1_L1_sc23	0	95.74
										GW16_PFC1_L1_sc24	Neurons	GW16_PFC1_L1_sc24	0	70.55
										GW16_PFC1_DL2_sc1	GABAergic neurons	GW16_PFC1_DL2_sc1	310.24	261.76
										GW16_PFC1_DL2_sc2	GABAergic neurons	GW16_PFC1_DL2_sc2	25.27	147.73
										GW16_PFC1_DL2_sc3	Neurons	GW16_PFC1_DL2_sc3	0	64.1
										GW16_PFC1_DL2_sc5	Neurons	GW16_PFC1_DL2_sc5	0	0
										GW16_PFC1_DL2_sc6	GABAergic neurons	GW16_PFC1_DL2_sc6	135.52	487.86
										GW16_PFC1_DL2_sc7	Stem cells	GW16_PFC1_DL2_sc7	186.76	216.88
										GW16_PFC1_DL2_sc8	Neurons	GW16_PFC1_DL2_sc8	0	313.12
										GW16_PFC1_DL2_sc9	Neurons	GW16_PFC1_DL2_sc9	10.38	0
										GW16_PFC1_DL2_sc10	Stem cells	GW16_PFC1_DL2_sc10	0	116.55
										GW16_PFC1_DL2_sc11	Neurons	GW16_PFC1_DL2_sc11	0	330.75
										GW16_PFC1_DL2_sc12	Neurons	GW16_PFC1_DL2_sc12	14.82	14.82
										GW16_PFC1_DL2_sc13	Neurons	GW16_PFC1_DL2_sc13	17.5	848.93
										GW16_PFC1_DL2_sc15	Neurons	GW16_PFC1_DL2_sc15	15.14	0
										GW16_PFC1_DL2_sc16	Neurons	GW16_PFC1_DL2_sc16	0	18.61
										GW16_PFC1_DL2_sc17	Stem cells	GW16_PFC1_DL2_sc17	221.61	9.43
										GW16_PFC1_DL2_sc18	Neurons	GW16_PFC1_DL2_sc18	0	0
										GW16_PFC1_DL2_sc19	Neurons	GW16_PFC1_DL2_sc19	0	567.02
										GW16_PFC1_DL2_sc20	Neurons	GW16_PFC1_DL2_sc20	0	0
										GW16_PFC1_DL2_sc21	Stem cells	GW16_PFC1_DL2_sc21	106.52	57.7
										GW16_PFC1_DL2_sc22	Neurons	GW16_PFC1_DL2_sc22	4.69	703.53
										GW16_PFC1_DL2_sc23	GABAergic neurons	GW16_PFC1_DL2_sc23	0	134.89
										GW16_PFC1_DL2_sc24	GABAergic neurons	GW16_PFC1_DL2_sc24	0	16.41
										GW16_PFC1_L3_sc1	Neurons	GW16_PFC1_L3_sc1	12.75	38.26
										GW16_PFC1_L3_sc2	Neurons	GW16_PFC1_L3_sc2	42	200.67
										GW16_PFC1_L3_sc3	Stem cells	GW16_PFC1_L3_sc3	76.77	44.2
										GW16_PFC1_L3_sc4	Neurons	GW16_PFC1_L3_sc4	49.29	443.58
										GW16_PFC1_L3_sc5	Stem cells	GW16_PFC1_L3_sc5	5.19	623.38
										GW16_PFC1_L3_sc6	Stem cells	GW16_PFC1_L3_sc6	27.08	139.9
										GW16_PFC1_L3_sc7	Stem cells	GW16_PFC1_L3_sc7	63.02	127.28
										GW16_PFC1_L3_sc8	Neurons	GW16_PFC1_L3_sc8	2.78	255.67
										GW16_PFC1_L3_sc9	Stem cells	GW16_PFC1_L3_sc9	179.24	181.88
										GW16_PFC1_L3_sc10	Stem cells	GW16_PFC1_L3_sc10	0	181.1
										GW16_PFC1_L3_sc11	Neurons	GW16_PFC1_L3_sc11	0	48.21
										GW16_PFC1_L3_sc12	Stem cells	GW16_PFC1_L3_sc12	0	0
										GW16_PFC1_L3_sc13	Neurons	GW16_PFC1_L3_sc13	18.39	82.75
										GW16_PFC1_L3_sc14	Neurons	GW16_PFC1_L3_sc14	246.84	425.12
										GW16_PFC1_L3_sc15	Stem cells	GW16_PFC1_L3_sc15	5.04	0
										GW16_PFC1_L3_sc16	Neurons	GW16_PFC1_L3_sc16	0	435.42
										GW16_PFC1_L3_sc17	Neurons	GW16_PFC1_L3_sc17	77.81	57.98
										GW16_PFC1_L3_sc18	Neurons	GW16_PFC1_L3_sc18	109.4	12.72
										GW16_PFC1_L3_sc19	Stem cells	GW16_PFC1_L3_sc19	12.47	24.94
										GW16_PFC1_L3_sc20	Neurons	GW16_PFC1_L3_sc20	121.48	170.59
										GW16_PFC1_L3_sc21	Neurons	GW16_PFC1_L3_sc21	0	230.58
										GW16_PFC1_L3_sc22	Neurons	GW16_PFC1_L3_sc22	3.62	231.65
										GW16_PFC1_L3_sc23	Stem cells	GW16_PFC1_L3_sc23	47.18	44.04
										GW16_PFC1_L3_sc24	Neurons	GW16_PFC1_L3_sc24	0	0
										GW16_PFC1_L2_sc1	Neurons	GW16_PFC1_L2_sc1	3.38	125.1
										GW16_PFC1_L2_sc3	Neurons	GW16_PFC1_L2_sc3	341.63	8.99
										GW16_PFC1_L2_sc4	Stem cells	GW16_PFC1_L2_sc4	179.33	9.69
										GW16_PFC1_L2_sc5	Neurons	GW16_PFC1_L2_sc5	0	68.86
										GW16_PFC1_L2_sc6	Neurons	GW16_PFC1_L2_sc6	3.89	175.08
										GW16_PFC1_L2_sc7	Neurons	GW16_PFC1_L2_sc7	9.18	312
										GW16_PFC1_L2_sc8	Neurons	GW16_PFC1_L2_sc8	0	64.55
										GW16_PFC1_L2_sc9	GABAergic neurons	GW16_PFC1_L2_sc9	2.01	49.61
										GW16_PFC1_L2_sc10	Neurons	GW16_PFC1_L2_sc10	14.08	309.71
										GW16_PFC1_L2_sc11	Neurons	GW16_PFC1_L2_sc11	153.75	276.74
										GW16_PFC1_L2_sc12	Neurons	GW16_PFC1_L2_sc12	67.8	365.34
										GW16_PFC1_L2_sc13	Neurons	GW16_PFC1_L2_sc13	2.55	206.9
										GW16_PFC1_L2_sc14	GABAergic neurons	GW16_PFC1_L2_sc14	0	0
										GW16_PFC1_L2_sc15	Neurons	GW16_PFC1_L2_sc15	0	0
										GW16_PFC1_L2_sc16	GABAergic neurons	GW16_PFC1_L2_sc16	0	24.42
										GW16_PFC1_D1_sc1	GABAergic neurons	GW16_PFC1_D1_sc1	739.33	76.48
										GW16_PFC1_D1_sc2	Neurons	GW16_PFC1_D1_sc2	70.73	160.32
										GW16_PFC1_D1_sc4	GABAergic neurons	GW16_PFC1_D1_sc4	0	597.95
										GW16_PFC1_D1_sc6	Neurons	GW16_PFC1_D1_sc6	63.75	63.75
										GW16_PFC1_D1_sc7	GABAergic neurons	GW16_PFC1_D1_sc7	102.59	461.67
										GW16_PFC1_D1_sc8	Neurons	GW16_PFC1_D1_sc8	0	11.58
										GW16_PFC1_D1_sc9	Neurons	GW16_PFC1_D1_sc9	6.94	6.94
										GW16_PFC1_D1_sc10	GABAergic neurons	GW16_PFC1_D1_sc10	0	11.43
										GW16_PFC1_D1_sc11	Neurons	GW16_PFC1_D1_sc11	0	91
										GW16_PFC1_D1_sc12	Neurons	GW16_PFC1_D1_sc12	0	1027.59
										GW16_PFC1_D1_sc13	Neurons	GW16_PFC1_D1_sc13	0	179.04
										GW16_PFC1_D1_sc14	Neurons	GW16_PFC1_D1_sc14	0	596.92
										GW16_PFC1_D1_sc15	GABAergic neurons	GW16_PFC1_D1_sc15	0	28.03
										GW16_PFC1_D1_sc16	Neurons	GW16_PFC1_D1_sc16	18.15	490.15
										GW16_PFC1_D1_sc17	Neurons	GW16_PFC1_D1_sc17	0	39.14
										GW16_PFC1_D1_sc18	Neurons	GW16_PFC1_D1_sc18	11.87	35.61
										GW16_PFC1_D1_sc19	Neurons	GW16_PFC1_D1_sc19	340.1	8.1
										GW16_PFC1_D1_sc20	Neurons	GW16_PFC1_D1_sc20	0	24.57
										GW16_PFC1_D1_sc21	GABAergic neurons	GW16_PFC1_D1_sc21	0	406.67
										GW16_PFC1_D1_sc22	Neurons	GW16_PFC1_D1_sc22	50.43	25.22
										GW16_PFC1_D1_sc23	Neurons	GW16_PFC1_D1_sc23	218.58	145.72
										GW16_PFC1_D1_sc24	Neurons	GW16_PFC1_D1_sc24	0	263.86
										GW16_PFC1_DL3_sc1	Neurons	GW16_PFC1_DL3_sc1	0	18.76
										GW16_PFC1_DL3_sc2	Neurons	GW16_PFC1_DL3_sc2	0	152.66
										GW16_PFC1_DL3_sc3	Neurons	GW16_PFC1_DL3_sc3	6.9	13.79
										GW16_PFC1_DL3_sc4	Neurons	GW16_PFC1_DL3_sc4	80.73	56.81
										GW16_PFC1_DL3_sc5	Neurons	GW16_PFC1_DL3_sc5	242.77	8.28
										GW16_PFC1_DL3_sc6	Neurons	GW16_PFC1_DL3_sc6	0	12.4
										GW16_PFC1_DL3_sc7	Stem cells	GW16_PFC1_DL3_sc7	31.89	326.84
										GW16_PFC1_DL3_sc8	Neurons	GW16_PFC1_DL3_sc8	3.43	84.63
										GW16_PFC1_DL3_sc9	Neurons	GW16_PFC1_DL3_sc9	0	194.73
										GW16_PFC1_DL3_sc10	Stem cells	GW16_PFC1_DL3_sc10	26.2	17.47
										GW16_PFC1_DL3_sc11	Neurons	GW16_PFC1_DL3_sc11	56.85	209.89
										GW16_PFC1_DL3_sc12	Stem cells	GW16_PFC1_DL3_sc12	251.89	4.8
										GW16_PFC1_DL3_sc13	Neurons	GW16_PFC1_DL3_sc13	28.98	20.28
										GW16_PFC1_DL3_sc14	Neurons	GW16_PFC1_DL3_sc14	30.14	137.55
										GW16_PFC1_DL3_sc15	Neurons	GW16_PFC1_DL3_sc15	0	412.74
										GW16_PFC1_DL3_sc16	Neurons	GW16_PFC1_DL3_sc16	1.72	270.61
										GW16_PFC1_DL3_sc17	Neurons	GW16_PFC1_DL3_sc17	42.97	14.32
										GW16_PFC1_DL3_sc18	Neurons	GW16_PFC1_DL3_sc18	19.76	81.36
										GW16_PFC1_DL3_sc19	Neurons	GW16_PFC1_DL3_sc19	52.68	77.94
										GW16_PFC1_DL3_sc20	Neurons	GW16_PFC1_DL3_sc20	0	118.99
										GW16_PFC1_DL3_sc21	Neurons	GW16_PFC1_DL3_sc21	5.71	188.49
										GW16_PFC1_DL3_sc22	Neurons	GW16_PFC1_DL3_sc22	6.19	66.02
										GW16_PFC1_DL3_sc23	Neurons	GW16_PFC1_DL3_sc23	41.78	320.33
										GW16_PFC1_DL3_sc24	Neurons	GW16_PFC1_DL3_sc24	3.87	205.08
										GW16_PFC1_DL4_sc1	Neurons	GW16_PFC1_DL4_sc1	0	26.09
										GW16_PFC1_DL4_sc2	GABAergic neurons	GW16_PFC1_DL4_sc2	0	537
										GW16_PFC1_DL4_sc3	Neurons	GW16_PFC1_DL4_sc3	0	37.99
										GW16_PFC1_DL4_sc4	Stem cells	GW16_PFC1_DL4_sc4	0	50.06
										GW16_PFC1_DL4_sc5	Neurons	GW16_PFC1_DL4_sc5	0	242.2
										GW16_PFC1_DL4_sc6	Neurons	GW16_PFC1_DL4_sc6	121.33	0
										GW16_PFC1_DL4_sc7	Neurons	GW16_PFC1_DL4_sc7	0	10.81
										GW16_PFC1_DL4_sc8	Neurons	GW16_PFC1_DL4_sc8	0	98.9
										GW16_PFC1_DL4_sc9	Neurons	GW16_PFC1_DL4_sc9	0	264.2
										GW16_PFC1_DL4_sc10	Neurons	GW16_PFC1_DL4_sc10	0	0
										GW16_PFC1_DL4_sc11	Neurons	GW16_PFC1_DL4_sc11	0	0
										GW16_PFC1_DL4_sc12	Neurons	GW16_PFC1_DL4_sc12	0	0
										GW16_PFC1_DL4_sc13	Neurons	GW16_PFC1_DL4_sc13	0	14.08
										GW16_PFC1_DL4_sc14	Neurons	GW16_PFC1_DL4_sc14	0	0
										GW16_PFC1_DL4_sc15	Neurons	GW16_PFC1_DL4_sc15	8.68	520.61
										GW16_PFC1_DL4_sc16	Stem cells	GW16_PFC1_DL4_sc16	0	62.81
										GW16_PFC1_DL4_sc17	Neurons	GW16_PFC1_DL4_sc17	0	108.97
										GW16_PFC1_DL4_sc18	OPC	GW16_PFC1_DL4_sc18	123.05	231.33
										GW16_PFC1_DL4_sc19	Neurons	GW16_PFC1_DL4_sc19	0	147.29
										GW16_PFC1_DL4_sc20	Neurons	GW16_PFC1_DL4_sc20	406.17	272.9
										GW16_PFC1_DL4_sc21	Neurons	GW16_PFC1_DL4_sc21	0	0
										GW16_PFC1_DL4_sc22	Neurons	GW16_PFC1_DL4_sc22	199.24	75.39
										GW16_PFC1_DL4_sc23	Neurons	GW16_PFC1_DL4_sc23	0	37.28
										GW16_PFC1_DL4_sc24	Neurons	GW16_PFC1_DL4_sc24	0	258.22
										GW16_PFC1_VL4_sc1	Neurons	GW16_PFC1_VL4_sc1	0	13.53
										GW16_PFC1_VL4_sc4	Neurons	GW16_PFC1_VL4_sc4	317.9	19.46
										GW16_PFC1_VL4_sc5	Neurons	GW16_PFC1_VL4_sc5	266.73	55.83
										GW16_PFC1_VL4_sc6	Neurons	GW16_PFC1_VL4_sc6	0	379.63
										GW16_PFC1_VL4_sc7	Neurons	GW16_PFC1_VL4_sc7	17.96	17.96
										GW16_PFC1_VL4_sc8	Neurons	GW16_PFC1_VL4_sc8	54.3	190.05
										GW16_PFC1_VL4_sc9	Neurons	GW16_PFC1_VL4_sc9	186.57	10.36
										GW16_PFC1_VL4_sc10	GABAergic neurons	GW16_PFC1_VL4_sc10	0	16.17
										GW16_PFC1_VL4_sc11	Neurons	GW16_PFC1_VL4_sc11	0	164.45
										GW16_PFC1_VL4_sc12	Stem cells	GW16_PFC1_VL4_sc12	270.86	177.35
										GW16_PFC1_VL4_sc13	Neurons	GW16_PFC1_VL4_sc13	81.74	284.32
										GW16_PFC1_VL4_sc14	Neurons	GW16_PFC1_VL4_sc14	0	52.85
										GW16_PFC1_VL4_sc15	Stem cells	GW16_PFC1_VL4_sc15	369.23	117.29
										GW16_PFC1_VL4_sc16	Stem cells	GW16_PFC1_VL4_sc16	174.31	75.38
										GW16_PFC1_F2_sc1	Neurons	GW16_PFC1_F2_sc1	0	0
										GW16_PFC1_F2_sc2	GABAergic neurons	GW16_PFC1_F2_sc2	0	706.34
										GW16_PFC1_F2_sc3	GABAergic neurons	GW16_PFC1_F2_sc3	1181.45	11.93
										GW16_PFC1_F2_sc4	Stem cells	GW16_PFC1_F2_sc4	156.03	156.03
										GW16_PFC1_F2_sc5	Neurons	GW16_PFC1_F2_sc5	87.67	185.09
										GW16_PFC1_F2_sc6	GABAergic neurons	GW16_PFC1_F2_sc6	0	783.39
										GW16_PFC1_F2_sc7	Neurons	GW16_PFC1_F2_sc7	75.15	0
										GW16_PFC1_F2_sc8	Neurons	GW16_PFC1_F2_sc8	0	229.71
										GW16_PFC1_F2_sc9	GABAergic neurons	GW16_PFC1_F2_sc9	0	6.29
										GW16_PFC1_F2_sc10	Stem cells	GW16_PFC1_F2_sc10	150.92	60.65
										GW16_PFC1_F2_sc11	Neurons	GW16_PFC1_F2_sc11	6.69	20.08
										GW16_PFC1_F2_sc12	Neurons	GW16_PFC1_F2_sc12	0	9.54
										GW16_PFC1_F2_sc13	Neurons	GW16_PFC1_F2_sc13	0	116.5
										GW16_PFC1_F2_sc15	Neurons	GW16_PFC1_F2_sc15	0	262.28
										GW16_PFC1_F2_sc16	Stem cells	GW16_PFC1_F2_sc16	0	19
										GW16_PFC1_F2_sc17	Stem cells	GW16_PFC1_F2_sc17	189.79	56.6
										GW16_PFC1_F2_sc18	Neurons	GW16_PFC1_F2_sc18	0	8.17
										GW16_PFC1_F2_sc19	Neurons	GW16_PFC1_F2_sc19	2.93	2.93
										GW16_PFC1_F2_sc22	Neurons	GW16_PFC1_F2_sc22	0	40.93
										GW16_PFC1_F2_sc23	Neurons	GW16_PFC1_F2_sc23	0	309.99
										GW16_PFC1_D2_sc1	Neurons	GW16_PFC1_D2_sc1	8.69	17.37
										GW16_PFC1_D2_sc2	Neurons	GW16_PFC1_D2_sc2	0	18.41
										GW16_PFC1_D2_sc3	OPC	GW16_PFC1_D2_sc3	0	324.49
										GW16_PFC1_D2_sc4	Stem cells	GW16_PFC1_D2_sc4	328.45	34.57
										GW16_PFC1_D2_sc5	Neurons	GW16_PFC1_D2_sc5	5.55	41.63
										GW16_PFC1_D2_sc6	Neurons	GW16_PFC1_D2_sc6	5.98	11.96
										GW16_PFC1_D2_sc7	Neurons	GW16_PFC1_D2_sc7	49.6	418.87
										GW16_PFC1_D2_sc8	GABAergic neurons	GW16_PFC1_D2_sc8	0	7.22
										GW16_PFC1_D2_sc9	GABAergic neurons	GW16_PFC1_D2_sc9	0	30.52
										GW16_PFC1_D2_sc10	Neurons	GW16_PFC1_D2_sc10	221.4	101.99
										GW16_PFC1_D2_sc11	Neurons	GW16_PFC1_D2_sc11	0	458.5
										GW16_PFC1_D2_sc12	Neurons	GW16_PFC1_D2_sc12	0	9.59
										GW16_PFC1_D2_sc13	Neurons	GW16_PFC1_D2_sc13	38.34	146.96
										GW16_PFC1_D2_sc14	Neurons	GW16_PFC1_D2_sc14	40.73	37.03
										GW16_PFC1_D2_sc15	Neurons	GW16_PFC1_D2_sc15	1119.31	0
										GW16_PFC1_D2_sc16	GABAergic neurons	GW16_PFC1_D2_sc16	116.57	475.23
										GW16_PFC1_D2_sc17	Neurons	GW16_PFC1_D2_sc17	7.69	38.46
										GW16_PFC1_D2_sc18	OPC	GW16_PFC1_D2_sc18	11.59	0
										GW16_PFC1_D2_sc19	Stem cells	GW16_PFC1_D2_sc19	4.71	65.98
										GW16_PFC1_D2_sc20	Stem cells	GW16_PFC1_D2_sc20	75.39	32.31
										GW16_PFC1_D2_sc21	Neurons	GW16_PFC1_D2_sc21	0	16.01
										GW16_PFC1_D2_sc23	Neurons	GW16_PFC1_D2_sc23	0	0
										GW16_PFC1_D2_sc24	GABAergic neurons	GW16_PFC1_D2_sc24	9.21	377.6
										GW16_PFC1_VL1_sc1	Neurons	GW16_PFC1_VL1_sc1	44.92	8.17
										GW16_PFC1_VL1_sc2	GABAergic neurons	GW16_PFC1_VL1_sc2	0	0
										GW16_PFC1_VL1_sc4	Stem cells	GW16_PFC1_VL1_sc4	328.46	35.19
										GW16_PFC1_VL1_sc5	GABAergic neurons	GW16_PFC1_VL1_sc5	3.76	7.53
										GW16_PFC1_VL1_sc6	Neurons	GW16_PFC1_VL1_sc6	0	0
										GW16_PFC1_VL1_sc7	Neurons	GW16_PFC1_VL1_sc7	0	5.88
										GW16_PFC1_VL1_sc8	Neurons	GW16_PFC1_VL1_sc8	11.04	309.03
										GW16_PFC1_VL1_sc9	Neurons	GW16_PFC1_VL1_sc9	0	62.81
										GW16_PFC1_VL1_sc10	Neurons	GW16_PFC1_VL1_sc10	0	21.78
										GW16_PFC1_VL1_sc11	OPC	GW16_PFC1_VL1_sc11	0	0
										GW16_PFC1_VL1_sc12	Neurons	GW16_PFC1_VL1_sc12	0	40.05
										GW16_PFC1_VL1_sc13	GABAergic neurons	GW16_PFC1_VL1_sc13	0	0
										GW16_PFC1_VL1_sc14	Neurons	GW16_PFC1_VL1_sc14	23.68	15.79
										GW16_PFC1_VL1_sc15	Stem cells	GW16_PFC1_VL1_sc15	7.8	35.1
										GW16_PFC1_VL1_sc16	Neurons	GW16_PFC1_VL1_sc16	10.42	15.63
										GW16_PFC1_VL1_sc17	Neurons	GW16_PFC1_VL1_sc17	14.5	58.02
										GW16_PFC1_VL1_sc18	Neurons	GW16_PFC1_VL1_sc18	135.04	216.57
										GW16_PFC1_VL1_sc19	Neurons	GW16_PFC1_VL1_sc19	6.3	88.25
										GW16_PFC1_VL1_sc20	Neurons	GW16_PFC1_VL1_sc20	0	196.28
										GW16_PFC1_VL1_sc21	Neurons	GW16_PFC1_VL1_sc21	0	174.76
										GW16_PFC1_VL1_sc22	Stem cells	GW16_PFC1_VL1_sc22	5.56	83.39
										GW16_PFC1_VL1_sc23	Neurons	GW16_PFC1_VL1_sc23	24.04	48.08
										GW16_PFC1_VL1_sc24	Neurons	GW16_PFC1_VL1_sc24	0	6.22
										GW16_PFC1_C2_sc1	Neurons	GW16_PFC1_C2_sc1	6.38	28.69
										GW16_PFC1_C2_sc2	Neurons	GW16_PFC1_C2_sc2	0	183.52
										GW16_PFC1_C2_sc3	Neurons	GW16_PFC1_C2_sc3	165.7	218.03
										GW16_PFC1_C2_sc4	GABAergic neurons	GW16_PFC1_C2_sc4	1.64	211.73
										GW16_PFC1_C2_sc5	Neurons	GW16_PFC1_C2_sc5	5.1	203.93
										GW16_PFC1_C2_sc6	Neurons	GW16_PFC1_C2_sc6	20	15
										GW16_PFC1_C2_sc7	Stem cells	GW16_PFC1_C2_sc7	106.63	62.2
										GW16_PFC1_C2_sc8	Neurons	GW16_PFC1_C2_sc8	11.09	125.11
										GW16_PFC1_C2_sc9	Neurons	GW16_PFC1_C2_sc9	58.95	135.36
										GW16_PFC1_C2_sc10	Neurons	GW16_PFC1_C2_sc10	4.49	174.02
										GW16_PFC1_C2_sc11	Neurons	GW16_PFC1_C2_sc11	0	64.74
										GW16_PFC1_C2_sc12	Stem cells	GW16_PFC1_C2_sc12	333.85	112.06
										GW16_PFC1_C2_sc13	GABAergic neurons	GW16_PFC1_C2_sc13	2.53	408.04
										GW16_PFC1_C2_sc14	Neurons	GW16_PFC1_C2_sc14	113.34	3.43
										GW16_PFC1_C2_sc15	Neurons	GW16_PFC1_C2_sc15	66.5	204.76
										GW16_PFC1_C2_sc16	Neurons	GW16_PFC1_C2_sc16	3.67	14.7
										GW16_PFC1_B1_sc19	Microglia	GW16_PFC1_B1_sc19	0	0
										GW16_PFC1_D4_sc1	Microglia	GW16_PFC1_D4_sc1	32.22	56.04
										GW16_PFC1_D4_sc17	Microglia	GW16_PFC1_D4_sc17	4.59	13.78
										GW16_PFC1_F3_sc4	Microglia	GW16_PFC1_F3_sc4	5.47	24.6
										GW16_PFC1_C1_sc12	Microglia	GW16_PFC1_C1_sc12	130.2	25.04
										GW16_PFC1_DL2_sc14	Microglia	GW16_PFC1_DL2_sc14	8.55	8.55
										GW16_PFC1_L2_sc2	Microglia	GW16_PFC1_L2_sc2	168.99	0
										GW16_PFC1_VL4_sc2	Microglia	GW16_PFC1_VL4_sc2	0	26.8
										GW16_PFC1_F2_sc20	Microglia	GW16_PFC1_F2_sc20	150.16	283
										GW16_PFC1_F2_sc24	Microglia	GW16_PFC1_F2_sc24	141.57	18.47
										GW16_PFC1_VL1_sc3	Microglia	GW16_PFC1_VL1_sc3	328.82	0
										GW19_PFC1_sc1	Neurons	GW19_PFC1_sc1	103.98	0
										GW19_PFC1_sc2	GABAergic neurons	GW19_PFC1_sc2	0	30.31
										GW19_PFC1_sc3	Stem cells	GW19_PFC1_sc3	239.09	402.11
										GW19_PFC1_sc4	OPC	GW19_PFC1_sc4	9.9	0
										GW19_PFC1_sc5	GABAergic neurons	GW19_PFC1_sc5	0	53.28
										GW19_PFC1_sc6	Neurons	GW19_PFC1_sc6	0	213.66
										GW19_PFC1_sc7	Neurons	GW19_PFC1_sc7	24.86	8.29
										GW19_PFC1_sc8	GABAergic neurons	GW19_PFC1_sc8	776.73	35.31
										GW19_PFC1_sc9	Neurons	GW19_PFC1_sc9	0	478.45
										GW19_PFC1_sc10	GABAergic neurons	GW19_PFC1_sc10	0	17.4
										GW19_PFC1_sc11	GABAergic neurons	GW19_PFC1_sc11	0	466.65
										GW19_PFC1_sc12	Neurons	GW19_PFC1_sc12	6.44	154.54
										GW19_PFC1_sc13	Neurons	GW19_PFC1_sc13	12.06	12.06
										GW19_PFC1_sc14	Neurons	GW19_PFC1_sc14	117.18	690.93
										GW19_PFC1_sc15	Astrocytes	GW19_PFC1_sc15	116.78	84.34
										GW19_PFC1_sc16	GABAergic neurons	GW19_PFC1_sc16	0	11
										GW19_PFC1_sc17	GABAergic neurons	GW19_PFC1_sc17	0	0
										GW19_PFC1_sc18	Neurons	GW19_PFC1_sc18	0	155.38
										GW19_PFC1_sc19	Neurons	GW19_PFC1_sc19	0	142.25
										GW19_PFC1_sc20	Neurons	GW19_PFC1_sc20	2.28	6.84
										GW19_PFC1_sc21	Neurons	GW19_PFC1_sc21	0	4.98
										GW19_PFC1_sc22	OPC	GW19_PFC1_sc22	6	17.99
										GW19_PFC1_sc23	OPC	GW19_PFC1_sc23	0	315.51
										GW19_PFC1_sc24	Neurons	GW19_PFC1_sc24	0	83.87
										GW19_PFC1_sc25	Neurons	GW19_PFC1_sc25	3.08	280.28
										GW19_PFC1_sc26	Astrocytes	GW19_PFC1_sc26	68.46	3.6
										GW19_PFC1_sc27	Neurons	GW19_PFC1_sc27	0	10.67
										GW19_PFC1_sc28	Neurons	GW19_PFC1_sc28	0	256.02
										GW19_PFC1_sc29	Neurons	GW19_PFC1_sc29	221.71	192.15
										GW19_PFC1_sc30	GABAergic neurons	GW19_PFC1_sc30	0	241.14
										GW19_PFC1_sc31	Neurons	GW19_PFC1_sc31	8.26	4.13
										GW19_PFC1_sc32	GABAergic neurons	GW19_PFC1_sc32	0	0
										GW19_PFC1_sc33	Neurons	GW19_PFC1_sc33	0	36.55
										GW19_PFC1_sc34	Neurons	GW19_PFC1_sc34	0	0
										GW19_PFC1_sc35	Neurons	GW19_PFC1_sc35	32.95	428.36
										GW19_PFC1_sc36	Neurons	GW19_PFC1_sc36	0	537.03
										GW19_PFC1_sc37	GABAergic neurons	GW19_PFC1_sc37	376.49	32.27
										GW19_PFC1_sc38	Neurons	GW19_PFC1_sc38	0	17.72
										GW19_PFC1_sc39	Astrocytes	GW19_PFC1_sc39	81.36	0
										GW19_PFC1_sc40	GABAergic neurons	GW19_PFC1_sc40	147.43	0
										GW19_PFC1_sc41	Neurons	GW19_PFC1_sc41	3.71	3.71
										GW19_PFC1_sc42	Neurons	GW19_PFC1_sc42	0	363.25
										GW19_PFC1_sc43	Neurons	GW19_PFC1_sc43	0	507.56
										GW19_PFC1_sc44	Neurons	GW19_PFC1_sc44	0	5.69
										GW19_PFC1_sc45	Neurons	GW19_PFC1_sc45	0	0
										GW19_PFC1_sc46	Neurons	GW19_PFC1_sc46	0	333.22
										GW19_PFC1_sc47	Stem cells	GW19_PFC1_sc47	99.72	0
										GW19_PFC1_sc49	Stem cells	GW19_PFC1_sc49	3.31	0
										GW19_PFC1_sc50	Neurons	GW19_PFC1_sc50	14.25	289.85
										GW19_PFC1_sc51	GABAergic neurons	GW19_PFC1_sc51	0	0
										GW19_PFC1_sc52	Neurons	GW19_PFC1_sc52	32.44	60.82
										GW19_PFC1_sc53	Neurons	GW19_PFC1_sc53	7.31	0
										GW19_PFC1_sc54	GABAergic neurons	GW19_PFC1_sc54	9.99	0
										GW19_PFC1_sc55	GABAergic neurons	GW19_PFC1_sc55	0	8.37
										GW19_PFC1_sc56	Stem cells	GW19_PFC1_sc56	96.63	3.15
										GW19_PFC1_sc57	Neurons	GW19_PFC1_sc57	0	51.38
										GW19_PFC1_sc58	Neurons	GW19_PFC1_sc58	0	17.28
										GW19_PFC1_sc59	Neurons	GW19_PFC1_sc59	0	13.98
										GW19_PFC1_sc60	GABAergic neurons	GW19_PFC1_sc60	0	21.66
										GW19_PFC1_sc61	Neurons	GW19_PFC1_sc61	0	0
										GW19_PFC1_sc62	Neurons	GW19_PFC1_sc62	0	325.29
										GW19_PFC1_sc63	Neurons	GW19_PFC1_sc63	0	62.46
										GW19_PFC1_sc64	Neurons	GW19_PFC1_sc64	0	0
										GW19_PFC1_sc65	GABAergic neurons	GW19_PFC1_sc65	0	49.79
										GW19_PFC1_sc66	Astrocytes	GW19_PFC1_sc66	25.51	10.2
										GW19_PFC1_sc67	Stem cells	GW19_PFC1_sc67	266.06	14.25
										GW19_PFC1_sc68	Neurons	GW19_PFC1_sc68	364.88	0
										GW19_PFC1_sc69	Neurons	GW19_PFC1_sc69	130.52	0
										GW19_PFC1_sc70	Neurons	GW19_PFC1_sc70	0	12.05
										GW19_PFC1_sc71	Neurons	GW19_PFC1_sc71	13.64	422.77
										GW19_PFC1_sc72	GABAergic neurons	GW19_PFC1_sc72	0	325.46
										GW19_PFC1_sc73	Neurons	GW19_PFC1_sc73	0	0
										GW19_PFC1_sc74	Neurons	GW19_PFC1_sc74	0	135.57
										GW19_PFC1_sc75	Neurons	GW19_PFC1_sc75	2.64	309.21
										GW19_PFC1_sc76	Neurons	GW19_PFC1_sc76	0	208.87
										GW19_PFC1_sc77	Neurons	GW19_PFC1_sc77	0	50.23
										GW19_PFC1_sc78	Neurons	GW19_PFC1_sc78	0	0
										GW19_PFC1_sc79	Neurons	GW19_PFC1_sc79	0	0
										GW19_PFC1_sc80	GABAergic neurons	GW19_PFC1_sc80	12.67	12.67
										GW19_PFC1_sc81	Neurons	GW19_PFC1_sc81	0	483.79
										GW19_PFC1_sc82	Neurons	GW19_PFC1_sc82	0	0
										GW19_PFC1_sc83	Neurons	GW19_PFC1_sc83	0	8.53
										GW19_PFC1_sc84	Neurons	GW19_PFC1_sc84	4.84	62.88
										GW19_PFC1_sc85	Neurons	GW19_PFC1_sc85	0	281.23
										GW19_PFC1_sc86	GABAergic neurons	GW19_PFC1_sc86	0	0
										GW19_PFC1_sc87	Neurons	GW19_PFC1_sc87	0	0
										GW19_PFC1_sc88	Neurons	GW19_PFC1_sc88	4.34	451.42
										GW19_PFC1_sc89	Neurons	GW19_PFC1_sc89	0	0
										GW19_PFC1_sc90	Neurons	GW19_PFC1_sc90	143.12	107.34
										GW19_PFC1_sc91	GABAergic neurons	GW19_PFC1_sc91	0	287.69
										GW19_PFC1_sc92	Neurons	GW19_PFC1_sc92	0	7.63
										GW19_PFC1_sc93	Neurons	GW19_PFC1_sc93	0	156.62
										GW19_PFC1_sc94	Neurons	GW19_PFC1_sc94	0	0
										GW19_PFC1_sc95	Neurons	GW19_PFC1_sc95	4.51	139.94
										GW19_PFC1_sc96	Neurons	GW19_PFC1_sc96	0	46.36
										GW19_PFC1_sc97	Neurons	GW19_PFC1_sc97	0	73.66
										GW19_PFC1_sc98	Neurons	GW19_PFC1_sc98	0	42.13
										GW19_PFC1_sc99	Astrocytes	GW19_PFC1_sc99	0	133.82
										GW19_PFC1_sc100	Neurons	GW19_PFC1_sc100	0	87.11
										GW19_PFC1_sc101	Neurons	GW19_PFC1_sc101	0	330.05
										GW19_PFC1_sc102	Neurons	GW19_PFC1_sc102	0	364.91
										GW19_PFC1_sc103	Neurons	GW19_PFC1_sc103	0	374.76
										GW19_PFC1_sc104	Neurons	GW19_PFC1_sc104	0	11.59
										GW19_PFC1_sc105	Astrocytes	GW19_PFC1_sc105	0	56.16
										GW19_PFC1_sc106	Neurons	GW19_PFC1_sc106	10.96	569.67
										GW19_PFC1_sc107	Neurons	GW19_PFC1_sc107	2.83	2.83
										GW19_PFC1_sc108	GABAergic neurons	GW19_PFC1_sc108	0	264.71
										GW19_PFC1_sc109	Neurons	GW19_PFC1_sc109	0	0
										GW19_PFC1_sc110	Neurons	GW19_PFC1_sc110	0	187.71
										GW19_PFC1_sc111	Neurons	GW19_PFC1_sc111	39.51	4.94
										GW19_PFC1_sc112	GABAergic neurons	GW19_PFC1_sc112	0	1044.78
										GW19_PFC1_sc113	Neurons	GW19_PFC1_sc113	0	0
										GW19_PFC1_sc114	Neurons	GW19_PFC1_sc114	303.7	151.85
										GW19_PFC1_sc115	Neurons	GW19_PFC1_sc115	0	650.64
										GW19_PFC1_sc116	Neurons	GW19_PFC1_sc116	214.08	0
										GW19_PFC1_sc117	Neurons	GW19_PFC1_sc117	0	263.02
										GW19_PFC1_sc118	Neurons	GW19_PFC1_sc118	0	0
										GW19_PFC1_sc119	Neurons	GW19_PFC1_sc119	0	12.97
										GW19_PFC1_sc120	OPC	GW19_PFC1_sc120	62.85	100.56
										GW19_PFC1_sc48	Microglia	GW19_PFC1_sc48	231.03	7.83
										GW23_PFC1_sc1	Neurons	GW23_PFC1_sc1	7.15	71.55
										GW23_PFC1_sc2	Astrocytes	GW23_PFC1_sc2	155.12	53.65
										GW23_PFC1_sc3	Neurons	GW23_PFC1_sc3	19.94	269.2
										GW23_PFC1_sc4	Neurons	GW23_PFC1_sc4	5.63	5.63
										GW23_PFC1_sc5	GABAergic neurons	GW23_PFC1_sc5	0	152.71
										GW23_PFC1_sc6	Neurons	GW23_PFC1_sc6	0	270.94
										GW23_PFC1_sc7	Neurons	GW23_PFC1_sc7	0	46.8
										GW23_PFC1_sc8	GABAergic neurons	GW23_PFC1_sc8	24.35	113.62
										GW23_PFC1_sc9	Neurons	GW23_PFC1_sc9	0	0
										GW23_PFC1_sc10	GABAergic neurons	GW23_PFC1_sc10	0	0
										GW23_PFC1_sc11	Neurons	GW23_PFC1_sc11	588.59	463.02
										GW23_PFC1_sc12	GABAergic neurons	GW23_PFC1_sc12	0	0
										GW23_PFC1_sc13	Neurons	GW23_PFC1_sc13	0	0
										GW23_PFC1_sc14	GABAergic neurons	GW23_PFC1_sc14	0	0
										GW23_PFC1_sc15	GABAergic neurons	GW23_PFC1_sc15	0	569.19
										GW23_PFC1_sc16	GABAergic neurons	GW23_PFC1_sc16	0	0
										GW23_PFC1_sc17	GABAergic neurons	GW23_PFC1_sc17	0	165.44
										GW23_PFC1_sc18	GABAergic neurons	GW23_PFC1_sc18	0	349.21
										GW23_PFC1_sc19	OPC	GW23_PFC1_sc19	0	0
										GW23_PFC1_sc20	OPC	GW23_PFC1_sc20	10.7	3.57
										GW23_PFC1_sc21	Neurons	GW23_PFC1_sc21	3.03	242.44
										GW23_PFC1_sc22	GABAergic neurons	GW23_PFC1_sc22	0	0
										GW23_PFC1_sc23	Neurons	GW23_PFC1_sc23	5.92	5.92
										GW23_PFC1_sc24	OPC	GW23_PFC1_sc24	23.5	91.05
										GW23_PFC1_sc25	GABAergic neurons	GW23_PFC1_sc25	0	287.59
										GW23_PFC1_sc26	GABAergic neurons	GW23_PFC1_sc26	10	500.05
										GW23_PFC1_sc27	Neurons	GW23_PFC1_sc27	0	313.97
										GW23_PFC1_sc28	Neurons	GW23_PFC1_sc28	0	1883.02
										GW23_PFC1_sc29	OPC	GW23_PFC1_sc29	0	0
										GW23_PFC1_sc30	Neurons	GW23_PFC1_sc30	229.35	38.22
										GW23_PFC1_sc31	GABAergic neurons	GW23_PFC1_sc31	15.58	0
										GW23_PFC1_sc32	GABAergic neurons	GW23_PFC1_sc32	0	283.36
										GW23_PFC1_sc33	GABAergic neurons	GW23_PFC1_sc33	0	441.02
										GW23_PFC1_sc34	GABAergic neurons	GW23_PFC1_sc34	0	7.3
										GW23_PFC1_sc35	OPC	GW23_PFC1_sc35	631.51	5.4
										GW23_PFC1_sc36	GABAergic neurons	GW23_PFC1_sc36	0	0
										GW23_PFC1_sc37	OPC	GW23_PFC1_sc37	342.28	0
										GW23_PFC1_sc38	Neurons	GW23_PFC1_sc38	0	395.16
										GW23_PFC1_sc39	GABAergic neurons	GW23_PFC1_sc39	0	0
										GW23_PFC1_sc40	Neurons	GW23_PFC1_sc40	0	0
										GW23_PFC1_sc41	Neurons	GW23_PFC1_sc41	5.45	0
										GW23_PFC1_sc42	Neurons	GW23_PFC1_sc42	0	0
										GW23_PFC1_sc43	Astrocytes	GW23_PFC1_sc43	0	0
										GW23_PFC1_sc44	GABAergic neurons	GW23_PFC1_sc44	0	0
										GW23_PFC1_sc45	Neurons	GW23_PFC1_sc45	5.79	0
										GW23_PFC1_sc46	Neurons	GW23_PFC1_sc46	0	517.42
										GW23_PFC1_sc47	Neurons	GW23_PFC1_sc47	78.71	594.73
										GW23_PFC1_sc48	Neurons	GW23_PFC1_sc48	6.26	394.41
										GW23_PFC1_sc49	Neurons	GW23_PFC1_sc49	1.55	4.66
										GW23_PFC1_sc50	GABAergic neurons	GW23_PFC1_sc50	0	686.45
										GW23_PFC1_sc51	GABAergic neurons	GW23_PFC1_sc51	0	263.02
										GW23_PFC1_sc52	GABAergic neurons	GW23_PFC1_sc52	0	0
										GW23_PFC1_sc53	GABAergic neurons	GW23_PFC1_sc53	0	0
										GW23_PFC1_sc54	Neurons	GW23_PFC1_sc54	86.41	0
										GW23_PFC1_sc55	OPC	GW23_PFC1_sc55	0	2.78
										GW23_PFC1_sc56	Neurons	GW23_PFC1_sc56	4.44	1052.36
										GW23_PFC1_sc57	GABAergic neurons	GW23_PFC1_sc57	6.86	0
										GW23_PFC1_sc58	Neurons	GW23_PFC1_sc58	6.87	446.4
										GW23_PFC1_sc59	Neurons	GW23_PFC1_sc59	0	0
										GW23_PFC1_sc60	Stem cells	GW23_PFC1_sc60	0	283.98
										GW23_PFC1_sc61	Neurons	GW23_PFC1_sc61	0	194.59
										GW23_PFC1_sc62	Neurons	GW23_PFC1_sc62	3.14	313.59
										GW23_PFC1_sc63	Neurons	GW23_PFC1_sc63	193.51	472.4
										GW23_PFC1_sc64	GABAergic neurons	GW23_PFC1_sc64	18.1	0
										GW23_PFC1_sc65	Astrocytes	GW23_PFC1_sc65	77.62	0
										GW23_PFC1_sc66	OPC	GW23_PFC1_sc66	3.44	0
										GW23_PFC1_sc67	GABAergic neurons	GW23_PFC1_sc67	0	355.31
										GW23_PFC1_sc68	Neurons	GW23_PFC1_sc68	2.7	142.95
										GW23_PFC1_sc69	GABAergic neurons	GW23_PFC1_sc69	0	200.15
										GW23_PFC1_sc70	GABAergic neurons	GW23_PFC1_sc70	0	590.36
										GW23_PFC1_sc72	Neurons	GW23_PFC1_sc72	0	14.09
										GW23_PFC1_sc73	Neurons	GW23_PFC1_sc73	7.35	0
										GW23_PFC1_sc74	Neurons	GW23_PFC1_sc74	0	161.58
										GW23_PFC1_sc75	Neurons	GW23_PFC1_sc75	0	0
										GW23_PFC1_sc77	GABAergic neurons	GW23_PFC1_sc77	0	0
										GW23_PFC1_sc78	GABAergic neurons	GW23_PFC1_sc78	15.23	45.68
										GW23_PFC1_sc79	GABAergic neurons	GW23_PFC1_sc79	3.13	0
										GW23_PFC1_sc80	Neurons	GW23_PFC1_sc80	0	201.82
										GW23_PFC1_sc81	GABAergic neurons	GW23_PFC1_sc81	0	9.83
										GW23_PFC1_sc82	OPC	GW23_PFC1_sc82	482.82	0
										GW23_PFC1_sc83	GABAergic neurons	GW23_PFC1_sc83	0	20.87
										GW23_PFC1_sc84	Neurons	GW23_PFC1_sc84	0	299.45
										GW23_PFC1_sc85	Neurons	GW23_PFC1_sc85	0	0
										GW23_PFC1_sc86	GABAergic neurons	GW23_PFC1_sc86	0	4.11
										GW23_PFC1_sc87	Neurons	GW23_PFC1_sc87	0	317.51
										GW23_PFC1_sc88	GABAergic neurons	GW23_PFC1_sc88	109.85	9.42
										GW23_PFC1_sc89	GABAergic neurons	GW23_PFC1_sc89	0	505.14
										GW23_PFC1_sc90	Neurons	GW23_PFC1_sc90	0	14.3
										GW23_PFC1_sc91	Neurons	GW23_PFC1_sc91	648.97	324.49
										GW23_PFC1_sc92	Neurons	GW23_PFC1_sc92	0	73.31
										GW23_PFC1_sc94	GABAergic neurons	GW23_PFC1_sc94	0	1004.17
										GW23_PFC1_sc95	GABAergic neurons	GW23_PFC1_sc95	0	0
										GW23_PFC1_sc96	Neurons	GW23_PFC1_sc96	0	0
										GW23_PFC1_sc105	Neurons	GW23_PFC1_sc105	0	0
										GW23_PFC1_sc106	GABAergic neurons	GW23_PFC1_sc106	0	22.9
										GW23_PFC1_sc107	Neurons	GW23_PFC1_sc107	0	159.99
										GW23_PFC1_sc108	Neurons	GW23_PFC1_sc108	3.89	93.43
										GW23_PFC1_sc109	GABAergic neurons	GW23_PFC1_sc109	0	0
										GW23_PFC1_sc110	GABAergic neurons	GW23_PFC1_sc110	0	0
										GW23_PFC1_sc111	GABAergic neurons	GW23_PFC1_sc111	0	0
										GW23_PFC1_sc112	Neurons	GW23_PFC1_sc112	0	154.9
										GW23_PFC1_sc113	GABAergic neurons	GW23_PFC1_sc113	0	0
										GW23_PFC1_sc114	GABAergic neurons	GW23_PFC1_sc114	0	212.93
										GW23_PFC1_sc115	GABAergic neurons	GW23_PFC1_sc115	0	71.01
										GW23_PFC1_sc116	GABAergic neurons	GW23_PFC1_sc116	0	3.45
										GW23_PFC1_sc117	OPC	GW23_PFC1_sc117	0	0
										GW23_PFC1_sc119	Neurons	GW23_PFC1_sc119	0	179.96
										GW23_PFC1_sc120	Neurons	GW23_PFC1_sc120	0	0
										GW23_PFC1_sc121	GABAergic neurons	GW23_PFC1_sc121	0	50.82
										GW23_PFC1_sc122	Neurons	GW23_PFC1_sc122	0	0
										GW23_PFC1_sc123	OPC	GW23_PFC1_sc123	0	0
										GW23_PFC1_sc124	Neurons	GW23_PFC1_sc124	148.81	9.92
										GW23_PFC1_sc125	GABAergic neurons	GW23_PFC1_sc125	0	205.22
										GW23_PFC1_sc126	GABAergic neurons	GW23_PFC1_sc126	0	10.23
										GW23_PFC1_sc127	GABAergic neurons	GW23_PFC1_sc127	16.78	13.42
										GW23_PFC1_sc128	Neurons	GW23_PFC1_sc128	0	34.07
										GW23_PFC1_sc129	GABAergic neurons	GW23_PFC1_sc129	0	431.34
										GW23_PFC1_sc130	Neurons	GW23_PFC1_sc130	574.02	7.36
										GW23_PFC1_sc131	OPC	GW23_PFC1_sc131	0	0
										GW23_PFC1_sc132	GABAergic neurons	GW23_PFC1_sc132	0	372.64
										GW23_PFC1_sc133	GABAergic neurons	GW23_PFC1_sc133	0	143.77
										GW23_PFC1_sc134	Neurons	GW23_PFC1_sc134	0	0
										GW23_PFC1_sc135	Neurons	GW23_PFC1_sc135	0	217.71
										GW23_PFC1_sc136	GABAergic neurons	GW23_PFC1_sc136	0	1416.93
										GW23_PFC1_sc137	Neurons	GW23_PFC1_sc137	16.76	48.42
										GW23_PFC1_sc138	Neurons	GW23_PFC1_sc138	92.11	337.75
										GW23_PFC1_sc139	OPC	GW23_PFC1_sc139	94.7	0
										GW23_PFC1_sc140	OPC	GW23_PFC1_sc140	0	0
										GW23_PFC1_sc141	Neurons	GW23_PFC1_sc141	0	75.86
										GW23_PFC1_sc142	Neurons	GW23_PFC1_sc142	0	153.23
										GW23_PFC1_sc143	Neurons	GW23_PFC1_sc143	3.76	365.04
										GW23_PFC2_RMF3_F10_sc51	GABAergic neurons	GW23_PFC2_RMF3_F10_sc51	107.93	71.95
										GW23_PFC2_RMF3_F10_sc52	Neurons	GW23_PFC2_RMF3_F10_sc52	0	176.93
										GW23_PFC2_RMF3_F10_sc53	GABAergic neurons	GW23_PFC2_RMF3_F10_sc53	0	1168.96
										GW23_PFC2_RMF3_F10_sc54	GABAergic neurons	GW23_PFC2_RMF3_F10_sc54	0	29.63
										GW23_PFC2_RMF3_F10_sc55	GABAergic neurons	GW23_PFC2_RMF3_F10_sc55	0	141.3
										GW23_PFC2_RMF3_F10_sc58	GABAergic neurons	GW23_PFC2_RMF3_F10_sc58	0	504.64
										GW23_PFC2_RMF3_F10_sc59	GABAergic neurons	GW23_PFC2_RMF3_F10_sc59	0	114.74
										GW23_PFC2_RMF3_F10_sc60	GABAergic neurons	GW23_PFC2_RMF3_F10_sc60	43.01	0
										GW23_PFC2_RMF3_F10_sc61	GABAergic neurons	GW23_PFC2_RMF3_F10_sc61	0	0
										GW23_PFC2_RMF3_F10_sc62	GABAergic neurons	GW23_PFC2_RMF3_F10_sc62	0	0
										GW23_PFC2_RMF3_F10_sc63	GABAergic neurons	GW23_PFC2_RMF3_F10_sc63	0	472.16
										GW23_PFC2_RMF3_F10_sc64	GABAergic neurons	GW23_PFC2_RMF3_F10_sc64	76.92	53.85
										GW23_PFC2_RMF3_F10_sc65	GABAergic neurons	GW23_PFC2_RMF3_F10_sc65	25.49	0
										GW23_PFC2_RMF3_F10_sc66	GABAergic neurons	GW23_PFC2_RMF3_F10_sc66	0	29.44
										GW23_PFC2_RMF3_F10_sc75	GABAergic neurons	GW23_PFC2_RMF3_F10_sc75	0	0
										GW23_PFC2_RMF3_F10_sc76	GABAergic neurons	GW23_PFC2_RMF3_F10_sc76	0	227.42
										GW23_PFC2_RMF3_F10_sc77	GABAergic neurons	GW23_PFC2_RMF3_F10_sc77	0	203.48
										GW23_PFC2_RMF3_F10_sc78	GABAergic neurons	GW23_PFC2_RMF3_F10_sc78	0	20.48
										GW23_PFC2_RMF3_F10_sc79	GABAergic neurons	GW23_PFC2_RMF3_F10_sc79	374.15	632.65
										GW23_PFC2_RMF3_F10_sc80	Neurons	GW23_PFC2_RMF3_F10_sc80	0	11.12
										GW23_PFC2_RMF3_F10_sc82	Stem cells	GW23_PFC2_RMF3_F10_sc82	142.46	0
										GW23_PFC2_PAO3_F15_sc27	GABAergic neurons	GW23_PFC2_PAO3_F15_sc27	0	0
										GW23_PFC2_PAO3_F15_sc28	GABAergic neurons	GW23_PFC2_PAO3_F15_sc28	0	337.22
										GW23_PFC2_PAO3_F15_sc29	OPC	GW23_PFC2_PAO3_F15_sc29	204.34	2.11
										GW23_PFC2_PAO3_F15_sc30	GABAergic neurons	GW23_PFC2_PAO3_F15_sc30	0	92.84
										GW23_PFC2_PAO3_F15_sc31	GABAergic neurons	GW23_PFC2_PAO3_F15_sc31	0	0
										GW23_PFC2_PAO3_F15_sc32	OPC	GW23_PFC2_PAO3_F15_sc32	5.95	130.92
										GW23_PFC2_PAO3_F15_sc33	Neurons	GW23_PFC2_PAO3_F15_sc33	0	168.54
										GW23_PFC2_PAO3_F15_sc36	GABAergic neurons	GW23_PFC2_PAO3_F15_sc36	6.76	74.41
										GW23_PFC2_PAO3_F15_sc37	GABAergic neurons	GW23_PFC2_PAO3_F15_sc37	0	0
										GW23_PFC2_PAO3_F15_sc38	GABAergic neurons	GW23_PFC2_PAO3_F15_sc38	0	643.27
										GW23_PFC2_PAO3_F15_sc39	GABAergic neurons	GW23_PFC2_PAO3_F15_sc39	0	0
										GW23_PFC2_PAO3_F15_sc40	GABAergic neurons	GW23_PFC2_PAO3_F15_sc40	0	176.81
										GW23_PFC2_PAO3_F15_sc41	GABAergic neurons	GW23_PFC2_PAO3_F15_sc41	80.64	203.1
										GW23_PFC2_PAO3_F15_sc42	GABAergic neurons	GW23_PFC2_PAO3_F15_sc42	0	9.89
										GW23_PFC2_PAO3_F15_sc43	GABAergic neurons	GW23_PFC2_PAO3_F15_sc43	0	149.79
										GW23_PFC2_PAO3_F15_sc44	Neurons	GW23_PFC2_PAO3_F15_sc44	0	250.7
										GW23_PFC2_PAO3_F15_sc45	OPC	GW23_PFC2_PAO3_F15_sc45	0	286.2
										GW23_PFC2_PAO3_F15_sc46	GABAergic neurons	GW23_PFC2_PAO3_F15_sc46	0	0
										GW23_PFC2_PAO3_F15_sc47	Neurons	GW23_PFC2_PAO3_F15_sc47	0	155.51
										GW23_PFC2_PAO3_F15_sc48	GABAergic neurons	GW23_PFC2_PAO3_F15_sc48	621.38	162.41
										GW23_PFC2_RMF2_F16_sc26	GABAergic neurons	GW23_PFC2_RMF2_F16_sc26	9.74	642.86
										GW23_PFC2_RMF2_F16_sc28	Astrocytes	GW23_PFC2_RMF2_F16_sc28	107.02	0
										GW23_PFC2_RMF2_F16_sc29	GABAergic neurons	GW23_PFC2_RMF2_F16_sc29	0	540.45
										GW23_PFC2_RMF2_F16_sc30	GABAergic neurons	GW23_PFC2_RMF2_F16_sc30	0	0
										GW23_PFC2_RMF2_F16_sc31	GABAergic neurons	GW23_PFC2_RMF2_F16_sc31	12.7	0
										GW23_PFC2_RMF2_F16_sc32	GABAergic neurons	GW23_PFC2_RMF2_F16_sc32	0	0
										GW23_PFC2_RMF2_F16_sc33	Neurons	GW23_PFC2_RMF2_F16_sc33	0	7.96
										GW23_PFC2_RMF2_F16_sc36	GABAergic neurons	GW23_PFC2_RMF2_F16_sc36	0	326.97
										GW23_PFC2_RMF2_F16_sc37	GABAergic neurons	GW23_PFC2_RMF2_F16_sc37	8.72	69.74
										GW23_PFC2_RMF2_F16_sc38	GABAergic neurons	GW23_PFC2_RMF2_F16_sc38	10.27	5.13
										GW23_PFC2_RMF2_F16_sc39	GABAergic neurons	GW23_PFC2_RMF2_F16_sc39	0	35.61
										GW23_PFC2_RMF2_F16_sc40	GABAergic neurons	GW23_PFC2_RMF2_F16_sc40	4.3	55.92
										GW23_PFC2_PAT4_F18_sc51	OPC	GW23_PFC2_PAT4_F18_sc51	198.7	238.45
										GW23_PFC2_PAT4_F18_sc52	Astrocytes	GW23_PFC2_PAT4_F18_sc52	0	0
										GW23_PFC2_PAT4_F18_sc53	GABAergic neurons	GW23_PFC2_PAT4_F18_sc53	13.88	17.34
										GW23_PFC2_PAT4_F18_sc54	GABAergic neurons	GW23_PFC2_PAT4_F18_sc54	98.32	294.95
										GW23_PFC2_PAT4_F18_sc55	GABAergic neurons	GW23_PFC2_PAT4_F18_sc55	0	317.53
										GW23_PFC2_PAT4_F18_sc56	GABAergic neurons	GW23_PFC2_PAT4_F18_sc56	0	87.5
										GW23_PFC2_PAT4_F18_sc57	OPC	GW23_PFC2_PAT4_F18_sc57	0	172.26
										GW23_PFC2_PAT4_F18_sc58	GABAergic neurons	GW23_PFC2_PAT4_F18_sc58	0	547.87
										GW23_PFC2_PAT4_F18_sc59	GABAergic neurons	GW23_PFC2_PAT4_F18_sc59	393.57	0
										GW23_PFC2_PAT4_F18_sc60	Neurons	GW23_PFC2_PAT4_F18_sc60	0	257.67
										GW23_PFC2_PAT4_F18_sc61	Neurons	GW23_PFC2_PAT4_F18_sc61	0	0
										GW23_PFC2_PAT4_F18_sc62	GABAergic neurons	GW23_PFC2_PAT4_F18_sc62	0	0
										GW23_PFC2_PAT4_F18_sc63	GABAergic neurons	GW23_PFC2_PAT4_F18_sc63	0	0
										GW23_PFC2_PAT4_F18_sc64	OPC	GW23_PFC2_PAT4_F18_sc64	91.19	66.32
										GW23_PFC2_PAT4_F18_sc65	GABAergic neurons	GW23_PFC2_PAT4_F18_sc65	0	208.27
										GW23_PFC2_PAT4_F18_sc66	GABAergic neurons	GW23_PFC2_PAT4_F18_sc66	74.18	0
										GW23_PFC2_PAT4_F18_sc67	GABAergic neurons	GW23_PFC2_PAT4_F18_sc67	0	1383.07
										GW23_PFC2_PAT4_F18_sc68	GABAergic neurons	GW23_PFC2_PAT4_F18_sc68	141.69	168.26
										GW23_PFC2_PAT4_F18_sc69	GABAergic neurons	GW23_PFC2_PAT4_F18_sc69	0	104.57
										GW23_PFC2_PAT4_F18_sc70	GABAergic neurons	GW23_PFC2_PAT4_F18_sc70	0	168.52
										GW23_PFC2_PAT4_F18_sc71	GABAergic neurons	GW23_PFC2_PAT4_F18_sc71	0	12.8
										GW23_PFC2_PAT4_F18_sc72	GABAergic neurons	GW23_PFC2_PAT4_F18_sc72	0	146.17
										GW23_PFC2_PAT4_F18_sc73	OPC	GW23_PFC2_PAT4_F18_sc73	36.98	65.73
										GW23_PFC2_PAT4_F18_sc74	GABAergic neurons	GW23_PFC2_PAT4_F18_sc74	4.53	289.6
										GW23_PFC2_SF1_F23_sc26	GABAergic neurons	GW23_PFC2_SF1_F23_sc26	93.57	13.37
										GW23_PFC2_SF1_F23_sc27	GABAergic neurons	GW23_PFC2_SF1_F23_sc27	99.44	0
										GW23_PFC2_SF1_F23_sc28	GABAergic neurons	GW23_PFC2_SF1_F23_sc28	0	208.88
										GW23_PFC2_SF1_F23_sc29	GABAergic neurons	GW23_PFC2_SF1_F23_sc29	0	181.95
										GW23_PFC2_SF1_F23_sc30	OPC	GW23_PFC2_SF1_F23_sc30	49.88	193.66
										GW23_PFC2_SF1_F23_sc31	Neurons	GW23_PFC2_SF1_F23_sc31	0	310.65
										GW23_PFC2_SF1_F23_sc32	GABAergic neurons	GW23_PFC2_SF1_F23_sc32	2.14	62.19
										GW23_PFC2_SF1_F23_sc35	GABAergic neurons	GW23_PFC2_SF1_F23_sc35	61.74	294.02
										GW23_PFC2_SF1_F23_sc36	Neurons	GW23_PFC2_SF1_F23_sc36	0	306.05
										GW23_PFC2_SF1_F23_sc37	GABAergic neurons	GW23_PFC2_SF1_F23_sc37	0	0
										GW23_PFC2_SF1_F23_sc38	GABAergic neurons	GW23_PFC2_SF1_F23_sc38	0	623.01
										GW23_PFC2_SF1_F23_sc39	Neurons	GW23_PFC2_SF1_F23_sc39	19.05	100.01
										GW23_PFC2_SF1_F23_sc40	GABAergic neurons	GW23_PFC2_SF1_F23_sc40	0	138.99
										GW23_PFC2_SF1_F23_sc41	Astrocytes	GW23_PFC2_SF1_F23_sc41	243.98	142.55
										GW23_PFC2_SF1_F23_sc42	Neurons	GW23_PFC2_SF1_F23_sc42	0	825.97
										GW23_PFC2_SF1_F23_sc43	Neurons	GW23_PFC2_SF1_F23_sc43	0	98.65
										GW23_PFC2_SF1_F23_sc44	GABAergic neurons	GW23_PFC2_SF1_F23_sc44	0	0
										GW23_PFC2_SF1_F23_sc45	Astrocytes	GW23_PFC2_SF1_F23_sc45	0	3.2
										GW23_PFC2_SF1_F23_sc46	OPC	GW23_PFC2_SF1_F23_sc46	136.08	183.19
										GW23_PFC2_SF1_F23_sc47	GABAergic neurons	GW23_PFC2_SF1_F23_sc47	0	16.32
										GW23_PFC2_SF1_F23_sc48	GABAergic neurons	GW23_PFC2_SF1_F23_sc48	0	0
										GW23_PFC2_SF1_F23_sc49	GABAergic neurons	GW23_PFC2_SF1_F23_sc49	0	673.1
										GW23_PFC2_SF1_F23_sc50	GABAergic neurons	GW23_PFC2_SF1_F23_sc50	2.72	0
										GW23_PFC2_PAO1_F24_sc2	GABAergic neurons	GW23_PFC2_PAO1_F24_sc2	4.44	192.45
										GW23_PFC2_PAO1_F24_sc3	GABAergic neurons	GW23_PFC2_PAO1_F24_sc3	0	60.04
										GW23_PFC2_PAO1_F24_sc4	GABAergic neurons	GW23_PFC2_PAO1_F24_sc4	0	339.75
										GW23_PFC2_PAO1_F24_sc6	GABAergic neurons	GW23_PFC2_PAO1_F24_sc6	0	39.48
										GW23_PFC2_PAO1_F24_sc7	GABAergic neurons	GW23_PFC2_PAO1_F24_sc7	0	20.24
										GW23_PFC2_PAO1_F24_sc8	OPC	GW23_PFC2_PAO1_F24_sc8	2.44	124.25
										GW23_PFC2_PAO1_F24_sc9	GABAergic neurons	GW23_PFC2_PAO1_F24_sc9	0	380.65
										GW23_PFC2_PAO1_F24_sc10	GABAergic neurons	GW23_PFC2_PAO1_F24_sc10	0	195.98
										GW23_PFC2_PAO1_F24_sc11	GABAergic neurons	GW23_PFC2_PAO1_F24_sc11	0	90.81
										GW23_PFC2_PAO1_F24_sc12	Neurons	GW23_PFC2_PAO1_F24_sc12	0	127.64
										GW23_PFC2_PAO1_F24_sc13	GABAergic neurons	GW23_PFC2_PAO1_F24_sc13	0	154.62
										GW23_PFC2_PAO1_F24_sc14	GABAergic neurons	GW23_PFC2_PAO1_F24_sc14	187.27	0
										GW23_PFC2_PAO1_F24_sc15	GABAergic neurons	GW23_PFC2_PAO1_F24_sc15	71.23	112.47
										GW23_PFC2_PAO1_F24_sc16	GABAergic neurons	GW23_PFC2_PAO1_F24_sc16	0	21.9
										GW23_PFC2_PAO1_F24_sc17	GABAergic neurons	GW23_PFC2_PAO1_F24_sc17	0	1328.83
										GW23_PFC2_PAO1_F24_sc18	GABAergic neurons	GW23_PFC2_PAO1_F24_sc18	0	0
										GW23_PFC2_PAO1_F24_sc19	GABAergic neurons	GW23_PFC2_PAO1_F24_sc19	145.22	132.02
										GW23_PFC2_PAO1_F24_sc20	GABAergic neurons	GW23_PFC2_PAO1_F24_sc20	0	876.35
										GW23_PFC2_PAO1_F24_sc21	Neurons	GW23_PFC2_PAO1_F24_sc21	7.57	234.64
										GW23_PFC2_PAO1_F24_sc22	GABAergic neurons	GW23_PFC2_PAO1_F24_sc22	0	187.69
										GW23_PFC2_PAO1_F24_sc24	GABAergic neurons	GW23_PFC2_PAO1_F24_sc24	0	0
										GW23_PFC2_PAO1_F24_sc25	Neurons	GW23_PFC2_PAO1_F24_sc25	49.71	356.24
										GW23_PFC2_RMF1_F24_sc26	Neurons	GW23_PFC2_RMF1_F24_sc26	0	124.13
										GW23_PFC2_RMF1_F24_sc28	Neurons	GW23_PFC2_RMF1_F24_sc28	0	64.04
										GW23_PFC2_RMF1_F24_sc29	GABAergic neurons	GW23_PFC2_RMF1_F24_sc29	0	137.07
										GW23_PFC2_RMF1_F24_sc30	GABAergic neurons	GW23_PFC2_RMF1_F24_sc30	0	0
										GW23_PFC2_RMF1_F24_sc31	Neurons	GW23_PFC2_RMF1_F24_sc31	0	103.35
										GW23_PFC2_RMF1_F24_sc32	GABAergic neurons	GW23_PFC2_RMF1_F24_sc32	0	290.07
										GW23_PFC2_RMF1_F24_sc33	GABAergic neurons	GW23_PFC2_RMF1_F24_sc33	0	434.33
										GW23_PFC2_RMF1_F24_sc35	Neurons	GW23_PFC2_RMF1_F24_sc35	0	279.86
										GW23_PFC2_RMF1_F24_sc36	GABAergic neurons	GW23_PFC2_RMF1_F24_sc36	0	99.96
										GW23_PFC2_RMF1_F24_sc37	GABAergic neurons	GW23_PFC2_RMF1_F24_sc37	87.06	217.66
										GW23_PFC2_RMF1_F24_sc38	Neurons	GW23_PFC2_RMF1_F24_sc38	0	167.08
										GW23_PFC2_RMF1_F24_sc39	Neurons	GW23_PFC2_RMF1_F24_sc39	63.58	201.34
										GW23_PFC2_RMF1_F24_sc40	Neurons	GW23_PFC2_RMF1_F24_sc40	4.96	0
										GW23_PFC2_RMF1_F24_sc41	GABAergic neurons	GW23_PFC2_RMF1_F24_sc41	0	10.29
										GW23_PFC2_RMF1_F24_sc42	GABAergic neurons	GW23_PFC2_RMF1_F24_sc42	322.3	289.41
										GW23_PFC2_RMF1_F24_sc43	Neurons	GW23_PFC2_RMF1_F24_sc43	0	132.65
										GW23_PFC2_RMF1_F24_sc44	Neurons	GW23_PFC2_RMF1_F24_sc44	0	151.06
										GW23_PFC2_RMF1_F24_sc45	Neurons	GW23_PFC2_RMF1_F24_sc45	0	820.11
										GW23_PFC2_RMF1_F24_sc46	GABAergic neurons	GW23_PFC2_RMF1_F24_sc46	0	0
										GW23_PFC2_RMF1_F24_sc47	GABAergic neurons	GW23_PFC2_RMF1_F24_sc47	0	543.35
										GW23_PFC2_RMF1_F24_sc48	GABAergic neurons	GW23_PFC2_RMF1_F24_sc48	0	6.83
										GW23_PFC2_RMF1_F24_sc49	GABAergic neurons	GW23_PFC2_RMF1_F24_sc49	0	36.02
										GW23_PFC2_RMF1_F24_sc50	GABAergic neurons	GW23_PFC2_RMF1_F24_sc50	108.31	309.46
										GW23_PFC2_SF2_F25_sc26	GABAergic neurons	GW23_PFC2_SF2_F25_sc26	0	510.6
										GW23_PFC2_SF2_F25_sc27	Neurons	GW23_PFC2_SF2_F25_sc27	0	178.51
										GW23_PFC2_SF2_F25_sc28	GABAergic neurons	GW23_PFC2_SF2_F25_sc28	0	730.64
										GW23_PFC2_SF2_F25_sc29	Neurons	GW23_PFC2_SF2_F25_sc29	0	458.61
										GW23_PFC2_SF2_F25_sc30	GABAergic neurons	GW23_PFC2_SF2_F25_sc30	0	0
										GW23_PFC2_SF2_F25_sc33	GABAergic neurons	GW23_PFC2_SF2_F25_sc33	0	97.61
										GW23_PFC2_SF2_F25_sc35	Neurons	GW23_PFC2_SF2_F25_sc35	0	202.89
										GW23_PFC2_SF2_F25_sc36	GABAergic neurons	GW23_PFC2_SF2_F25_sc36	0	395
										GW23_PFC2_SF2_F25_sc37	GABAergic neurons	GW23_PFC2_SF2_F25_sc37	204.7	0
										GW23_PFC2_SF2_F25_sc39	GABAergic neurons	GW23_PFC2_SF2_F25_sc39	0	0
										GW23_PFC2_SF2_F25_sc40	GABAergic neurons	GW23_PFC2_SF2_F25_sc40	14.81	37.02
										GW23_PFC2_SF2_F25_sc41	Neurons	GW23_PFC2_SF2_F25_sc41	12.65	56.93
										GW23_PFC2_SF2_F25_sc42	GABAergic neurons	GW23_PFC2_SF2_F25_sc42	0	0
										GW23_PFC2_SF2_F25_sc43	GABAergic neurons	GW23_PFC2_SF2_F25_sc43	0	733.68
										GW23_PFC2_SF2_F25_sc44	GABAergic neurons	GW23_PFC2_SF2_F25_sc44	0	426.06
										GW23_PFC2_SF2_F25_sc45	GABAergic neurons	GW23_PFC2_SF2_F25_sc45	0	539.91
										GW23_PFC2_SF2_F25_sc46	GABAergic neurons	GW23_PFC2_SF2_F25_sc46	0	371.88
										GW23_PFC2_SF2_F25_sc47	OPC	GW23_PFC2_SF2_F25_sc47	22.78	19.52
										GW23_PFC2_SF2_F25_sc48	GABAergic neurons	GW23_PFC2_SF2_F25_sc48	0	127.43
										GW23_PFC2_SF2_F25_sc49	GABAergic neurons	GW23_PFC2_SF2_F25_sc49	0	180.02
										GW23_PFC2_SF2_F25_sc50	GABAergic neurons	GW23_PFC2_SF2_F25_sc50	0	418.27
										GW23_PFC2_RMF3_F10_sc81	Microglia	GW23_PFC2_RMF3_F10_sc81	0	4.54
										GW23_PFC2_PAO3_F15_sc35	Microglia	GW23_PFC2_PAO3_F15_sc35	28.01	5.6
										GW23_PFC2_PAO3_F15_sc49	Microglia	GW23_PFC2_PAO3_F15_sc49	320.17	12.08
										GW23_PFC2_PAO3_F15_sc50	Microglia	GW23_PFC2_PAO3_F15_sc50	468.09	0
										GW23_PFC2_RMF2_F16_sc27	Microglia	GW23_PFC2_RMF2_F16_sc27	0	36.53
										GW23_PFC2_RMF2_F16_sc41	Microglia	GW23_PFC2_RMF2_F16_sc41	0	8.16
										GW23_PFC2_SF1_F23_sc33	Microglia	GW23_PFC2_SF1_F23_sc33	192.67	131.02
										GW23_PFC2_PAO1_F24_sc5	Microglia	GW23_PFC2_PAO1_F24_sc5	0	47.53
										GW23_PFC2_SF2_F25_sc31	Microglia	GW23_PFC2_SF2_F25_sc31	442.33	0
										GW23_PFC2_SF2_F25_sc38	Microglia	GW23_PFC2_SF2_F25_sc38	0	7.89
										GW26_PFC1_M4_sc1	GABAergic neurons	GW26_PFC1_M4_sc1	13.57	94.98
										GW26_PFC1_M4_sc2	OPC	GW26_PFC1_M4_sc2	125.65	40.75
										GW26_PFC1_M4_sc3	GABAergic neurons	GW26_PFC1_M4_sc3	19.28	0
										GW26_PFC1_M4_sc4	GABAergic neurons	GW26_PFC1_M4_sc4	3.3	197.99
										GW26_PFC1_M4_sc6	GABAergic neurons	GW26_PFC1_M4_sc6	0	0
										GW26_PFC1_M4_sc7	GABAergic neurons	GW26_PFC1_M4_sc7	19.29	4.82
										GW26_PFC1_M4_sc8	GABAergic neurons	GW26_PFC1_M4_sc8	177.94	11.48
										GW26_PFC1_M4_sc9	Astrocytes	GW26_PFC1_M4_sc9	2.17	17.36
										GW26_PFC1_M4_sc11	GABAergic neurons	GW26_PFC1_M4_sc11	304.69	1343.42
										GW26_PFC1_M4_sc12	GABAergic neurons	GW26_PFC1_M4_sc12	0	20.11
										GW26_PFC1_O4_sc2	OPC	GW26_PFC1_O4_sc2	101.9	8.49
										GW26_PFC1_O4_sc3	Astrocytes	GW26_PFC1_O4_sc3	20.9	0
										GW26_PFC1_O4_sc4	Neurons	GW26_PFC1_O4_sc4	0	0
										GW26_PFC1_O4_sc5	Astrocytes	GW26_PFC1_O4_sc5	0	98.98
										GW26_PFC1_O4_sc6	GABAergic neurons	GW26_PFC1_O4_sc6	0	190.03
										GW26_PFC1_O4_sc7	GABAergic neurons	GW26_PFC1_O4_sc7	0	0
										GW26_PFC1_O4_sc8	Neurons	GW26_PFC1_O4_sc8	0	0
										GW26_PFC1_O4_sc10	Neurons	GW26_PFC1_O4_sc10	0	21.6
										GW26_PFC1_O4_sc11	GABAergic neurons	GW26_PFC1_O4_sc11	24.13	0
										GW26_PFC1_O4_sc12	GABAergic neurons	GW26_PFC1_O4_sc12	26.57	491.61
										GW26_PFC1_H4_sc1	GABAergic neurons	GW26_PFC1_H4_sc1	5.49	71.38
										GW26_PFC1_H4_sc3	OPC	GW26_PFC1_H4_sc3	0	61.14
										GW26_PFC1_H4_sc4	Neurons	GW26_PFC1_H4_sc4	0	98.62
										GW26_PFC1_H4_sc6	GABAergic neurons	GW26_PFC1_H4_sc6	0	0
										GW26_PFC1_H4_sc7	OPC	GW26_PFC1_H4_sc7	133.18	181.61
										GW26_PFC1_H4_sc8	Astrocytes	GW26_PFC1_H4_sc8	0	0
										GW26_PFC1_H4_sc9	GABAergic neurons	GW26_PFC1_H4_sc9	0	0
										GW26_PFC1_H4_sc10	OPC	GW26_PFC1_H4_sc10	0	190.29
										GW26_PFC1_R4_sc1	GABAergic neurons	GW26_PFC1_R4_sc1	10.29	258.96
										GW26_PFC1_R4_sc2	GABAergic neurons	GW26_PFC1_R4_sc2	0	0
										GW26_PFC1_R4_sc3	GABAergic neurons	GW26_PFC1_R4_sc3	18.13	924.68
										GW26_PFC1_R4_sc4	GABAergic neurons	GW26_PFC1_R4_sc4	4.96	36.38
										GW26_PFC1_R4_sc5	GABAergic neurons	GW26_PFC1_R4_sc5	0	23.24
										GW26_PFC1_R4_sc6	GABAergic neurons	GW26_PFC1_R4_sc6	0	87.68
										GW26_PFC1_R4_sc7	GABAergic neurons	GW26_PFC1_R4_sc7	148.43	155.18
										GW26_PFC1_R4_sc8	GABAergic neurons	GW26_PFC1_R4_sc8	328.35	0
										GW26_PFC1_Q4_sc1	Neurons	GW26_PFC1_Q4_sc1	0	0
										GW26_PFC1_Q4_sc2	GABAergic neurons	GW26_PFC1_Q4_sc2	288.43	166.99
										GW26_PFC1_Q4_sc3	GABAergic neurons	GW26_PFC1_Q4_sc3	0	0
										GW26_PFC1_Q4_sc4	GABAergic neurons	GW26_PFC1_Q4_sc4	5.23	47.1
										GW26_PFC1_Q4_sc6	Neurons	GW26_PFC1_Q4_sc6	0	0
										GW26_PFC1_Q4_sc7	GABAergic neurons	GW26_PFC1_Q4_sc7	0	0
										GW26_PFC1_Q4_sc8	GABAergic neurons	GW26_PFC1_Q4_sc8	0	0
										GW26_PFC1_J4_sc1	GABAergic neurons	GW26_PFC1_J4_sc1	10.87	97.87
										GW26_PFC1_J4_sc2	Neurons	GW26_PFC1_J4_sc2	0	0
										GW26_PFC1_J4_sc6	GABAergic neurons	GW26_PFC1_J4_sc6	0	176.96
										GW26_PFC1_J4_sc7	GABAergic neurons	GW26_PFC1_J4_sc7	0	35.43
										GW26_PFC1_J4_sc8	GABAergic neurons	GW26_PFC1_J4_sc8	0	609.14
										GW26_PFC1_I4_sc1	GABAergic neurons	GW26_PFC1_I4_sc1	0	0
										GW26_PFC1_I4_sc3	Neurons	GW26_PFC1_I4_sc3	0	135.72
										GW26_PFC1_I4_sc4	Neurons	GW26_PFC1_I4_sc4	0	996.72
										GW26_PFC1_I4_sc5	Neurons	GW26_PFC1_I4_sc5	0	0
										GW26_PFC1_I4_sc6	GABAergic neurons	GW26_PFC1_I4_sc6	0	0
										GW26_PFC1_Q3_sc1	GABAergic neurons	GW26_PFC1_Q3_sc1	10.55	103.36
										GW26_PFC1_Q3_sc2	GABAergic neurons	GW26_PFC1_Q3_sc2	15.88	0
										GW26_PFC1_Q3_sc3	GABAergic neurons	GW26_PFC1_Q3_sc3	0	0
										GW26_PFC1_Q3_sc4	GABAergic neurons	GW26_PFC1_Q3_sc4	549.07	716.17
										GW26_PFC1_Q3_sc5	GABAergic neurons	GW26_PFC1_Q3_sc5	10.59	10.59
										GW26_PFC1_Q3_sc6	GABAergic neurons	GW26_PFC1_Q3_sc6	0	0
										GW26_PFC1_Q3_sc7	Neurons	GW26_PFC1_Q3_sc7	147.94	7.79
										GW26_PFC1_Q3_sc8	GABAergic neurons	GW26_PFC1_Q3_sc8	0	0
										GW26_PFC1_Q3_sc9	GABAergic neurons	GW26_PFC1_Q3_sc9	25.17	232.84
										GW26_PFC1_Q3_sc10	GABAergic neurons	GW26_PFC1_Q3_sc10	0	491.26
										GW26_PFC1_Q3_sc11	GABAergic neurons	GW26_PFC1_Q3_sc11	373.61	335.61
										GW26_PFC1_Q3_sc12	Neurons	GW26_PFC1_Q3_sc12	15.97	63.9
										GW26_PFC1_Q3_sc13	GABAergic neurons	GW26_PFC1_Q3_sc13	97.11	222.78
										GW26_PFC1_Q3_sc14	GABAergic neurons	GW26_PFC1_Q3_sc14	14.3	193.1
										GW26_PFC1_Q3_sc15	Neurons	GW26_PFC1_Q3_sc15	13.21	26.42
										GW26_PFC1_Q3_sc16	Neurons	GW26_PFC1_Q3_sc16	0	27.72
										GW26_PFC1_Q3_sc17	Neurons	GW26_PFC1_Q3_sc17	123.23	227.5
										GW26_PFC1_Q3_sc18	Neurons	GW26_PFC1_Q3_sc18	3.37	1.68
										GW26_PFC1_Q3_sc19	GABAergic neurons	GW26_PFC1_Q3_sc19	46.9	169.17
										GW26_PFC1_Q3_sc20	GABAergic neurons	GW26_PFC1_Q3_sc20	6.26	430.13
										GW26_PFC1_Q3_sc21	Neurons	GW26_PFC1_Q3_sc21	30.34	102.41
										GW26_PFC1_Q3_sc22	GABAergic neurons	GW26_PFC1_Q3_sc22	388.33	78.54
										GW26_PFC1_Q3_sc23	Astrocytes	GW26_PFC1_Q3_sc23	0	8
										GW26_PFC1_Q3_sc24	GABAergic neurons	GW26_PFC1_Q3_sc24	3.4	91.87
										GW26_PFC1_N4_sc1	OPC	GW26_PFC1_N4_sc1	0	11.11
										GW26_PFC1_N4_sc2	Neurons	GW26_PFC1_N4_sc2	38.58	77.15
										GW26_PFC1_N4_sc3	GABAergic neurons	GW26_PFC1_N4_sc3	0	24.8
										GW26_PFC1_N4_sc4	OPC	GW26_PFC1_N4_sc4	190.92	0
										GW26_PFC1_N4_sc5	Astrocytes	GW26_PFC1_N4_sc5	77.03	171.72
										GW26_PFC1_N4_sc6	Astrocytes	GW26_PFC1_N4_sc6	153.2	69.47
										GW26_PFC1_N4_sc7	GABAergic neurons	GW26_PFC1_N4_sc7	159.59	24.76
										GW26_PFC1_N4_sc8	OPC	GW26_PFC1_N4_sc8	190.69	28.89
										GW26_PFC1_N4_sc9	OPC	GW26_PFC1_N4_sc9	203.68	4.74
										GW26_PFC1_N4_sc10	GABAergic neurons	GW26_PFC1_N4_sc10	61.99	8.86
										GW26_PFC1_N4_sc12	OPC	GW26_PFC1_N4_sc12	0	3.2
										GW26_PFC1_N4_sc13	OPC	GW26_PFC1_N4_sc13	174.5	2.53
										GW26_PFC1_N4_sc14	OPC	GW26_PFC1_N4_sc14	103.16	298.01
										GW26_PFC1_N4_sc15	GABAergic neurons	GW26_PFC1_N4_sc15	16.68	294.61
										GW26_PFC1_N4_sc16	OPC	GW26_PFC1_N4_sc16	112.66	81.93
										GW26_PFC1_G3_sc1	GABAergic neurons	GW26_PFC1_G3_sc1	9.09	309.09
										GW26_PFC1_G3_sc2	GABAergic neurons	GW26_PFC1_G3_sc2	0	4.57
										GW26_PFC1_G3_sc3	Astrocytes	GW26_PFC1_G3_sc3	8.42	10.53
										GW26_PFC1_G3_sc4	OPC	GW26_PFC1_G3_sc4	8.8	616.19
										GW26_PFC1_G3_sc5	OPC	GW26_PFC1_G3_sc5	311.28	2.83
										GW26_PFC1_G3_sc6	OPC	GW26_PFC1_G3_sc6	0	0
										GW26_PFC1_G3_sc7	Neurons	GW26_PFC1_G3_sc7	0	1236.76
										GW26_PFC1_G3_sc8	GABAergic neurons	GW26_PFC1_G3_sc8	0	127.2
										GW26_PFC1_G3_sc9	Astrocytes	GW26_PFC1_G3_sc9	273.28	2.15
										GW26_PFC1_G3_sc10	Astrocytes	GW26_PFC1_G3_sc10	91.07	81.83
										GW26_PFC1_G3_sc11	OPC	GW26_PFC1_G3_sc11	201.3	0
										GW26_PFC1_G3_sc12	GABAergic neurons	GW26_PFC1_G3_sc12	0	0
										GW26_PFC1_G3_sc13	OPC	GW26_PFC1_G3_sc13	160.87	5.03
										GW26_PFC1_G3_sc14	OPC	GW26_PFC1_G3_sc14	0	10.27
										GW26_PFC1_G3_sc15	Astrocytes	GW26_PFC1_G3_sc15	61.96	4.77
										GW26_PFC1_G3_sc16	GABAergic neurons	GW26_PFC1_G3_sc16	3.56	110.32
										GW26_PFC1_J2_sc1	GABAergic neurons	GW26_PFC1_J2_sc1	9.54	143.05
										GW26_PFC1_J2_sc2	Neurons	GW26_PFC1_J2_sc2	31.77	73.32
										GW26_PFC1_J2_sc3	GABAergic neurons	GW26_PFC1_J2_sc3	0	3.21
										GW26_PFC1_J2_sc4	GABAergic neurons	GW26_PFC1_J2_sc4	0	0
										GW26_PFC1_J2_sc5	GABAergic neurons	GW26_PFC1_J2_sc5	0	312.1
										GW26_PFC1_J2_sc6	GABAergic neurons	GW26_PFC1_J2_sc6	2.7	224.04
										GW26_PFC1_J2_sc7	GABAergic neurons	GW26_PFC1_J2_sc7	136.25	529.14
										GW26_PFC1_J2_sc8	GABAergic neurons	GW26_PFC1_J2_sc8	0	15.73
										GW26_PFC1_J2_sc9	GABAergic neurons	GW26_PFC1_J2_sc9	0	10.05
										GW26_PFC1_J2_sc10	GABAergic neurons	GW26_PFC1_J2_sc10	0	131.24
										GW26_PFC1_J2_sc11	GABAergic neurons	GW26_PFC1_J2_sc11	0	0
										GW26_PFC1_J2_sc13	GABAergic neurons	GW26_PFC1_J2_sc13	5.27	134.38
										GW26_PFC1_J2_sc15	GABAergic neurons	GW26_PFC1_J2_sc15	164.15	228.2
										GW26_PFC1_J2_sc16	Neurons	GW26_PFC1_J2_sc16	0	207.78
										GW26_PFC1_L1_sc2	GABAergic neurons	GW26_PFC1_L1_sc2	0	0
										GW26_PFC1_L1_sc3	GABAergic neurons	GW26_PFC1_L1_sc3	0	0
										GW26_PFC1_L1_sc4	GABAergic neurons	GW26_PFC1_L1_sc4	107.4	210.82
										GW26_PFC1_L1_sc5	GABAergic neurons	GW26_PFC1_L1_sc5	422.81	17.62
										GW26_PFC1_L1_sc6	GABAergic neurons	GW26_PFC1_L1_sc6	0	8.55
										GW26_PFC1_L1_sc8	GABAergic neurons	GW26_PFC1_L1_sc8	128.21	144.98
										GW26_PFC1_L1_sc9	GABAergic neurons	GW26_PFC1_L1_sc9	0	267.22
										GW26_PFC1_L1_sc11	GABAergic neurons	GW26_PFC1_L1_sc11	2.24	210.09
										GW26_PFC1_L1_sc12	GABAergic neurons	GW26_PFC1_L1_sc12	225.2	619.3
										GW26_PFC1_L1_sc13	GABAergic neurons	GW26_PFC1_L1_sc13	1.3	222.04
										GW26_PFC1_L1_sc14	GABAergic neurons	GW26_PFC1_L1_sc14	255.88	23.62
										GW26_PFC1_L1_sc16	GABAergic neurons	GW26_PFC1_L1_sc16	0	211.96
										GW26_PFC1_H2_sc1	GABAergic neurons	GW26_PFC1_H2_sc1	93.69	117.57
										GW26_PFC1_H2_sc2	GABAergic neurons	GW26_PFC1_H2_sc2	5.72	22.88
										GW26_PFC1_H2_sc3	Astrocytes	GW26_PFC1_H2_sc3	0	36.48
										GW26_PFC1_H2_sc4	GABAergic neurons	GW26_PFC1_H2_sc4	0	21.45
										GW26_PFC1_H2_sc5	Astrocytes	GW26_PFC1_H2_sc5	129.72	124.48
										GW26_PFC1_H2_sc6	GABAergic neurons	GW26_PFC1_H2_sc6	0	419.18
										GW26_PFC1_H2_sc7	GABAergic neurons	GW26_PFC1_H2_sc7	43.15	43.15
										GW26_PFC1_H2_sc8	GABAergic neurons	GW26_PFC1_H2_sc8	0	0
										GW26_PFC1_H2_sc11	GABAergic neurons	GW26_PFC1_H2_sc11	14.07	112.55
										GW26_PFC1_H2_sc12	GABAergic neurons	GW26_PFC1_H2_sc12	9.22	13.83
										GW26_PFC1_H2_sc13	GABAergic neurons	GW26_PFC1_H2_sc13	0	19.99
										GW26_PFC1_H2_sc14	GABAergic neurons	GW26_PFC1_H2_sc14	0	57.34
										GW26_PFC1_H2_sc15	GABAergic neurons	GW26_PFC1_H2_sc15	5.9	41.32
										GW26_PFC1_H2_sc16	GABAergic neurons	GW26_PFC1_H2_sc16	0	0
										GW26_PFC1_K4_sc2	Stem cells	GW26_PFC1_K4_sc2	204.41	0
										GW26_PFC1_K4_sc3	Neurons	GW26_PFC1_K4_sc3	0	0
										GW26_PFC1_K4_sc4	GABAergic neurons	GW26_PFC1_K4_sc4	0	15.32
										GW26_PFC1_K4_sc5	GABAergic neurons	GW26_PFC1_K4_sc5	0	741.43
										GW26_PFC1_K4_sc6	Neurons	GW26_PFC1_K4_sc6	0	299.45
										GW26_PFC1_K4_sc7	Neurons	GW26_PFC1_K4_sc7	0	1296.32
										GW26_PFC1_K4_sc8	Neurons	GW26_PFC1_K4_sc8	0	0
										GW26_PFC1_I3_sc1	GABAergic neurons	GW26_PFC1_I3_sc1	3.09	81.4
										GW26_PFC1_I3_sc2	GABAergic neurons	GW26_PFC1_I3_sc2	145.26	193.67
										GW26_PFC1_I3_sc3	Neurons	GW26_PFC1_I3_sc3	431.18	193.67
										GW26_PFC1_I3_sc4	GABAergic neurons	GW26_PFC1_I3_sc4	17.66	21.2
										GW26_PFC1_I3_sc5	GABAergic neurons	GW26_PFC1_I3_sc5	81.79	200.59
										GW26_PFC1_I3_sc7	GABAergic neurons	GW26_PFC1_I3_sc7	0	20.75
										GW26_PFC1_I3_sc8	GABAergic neurons	GW26_PFC1_I3_sc8	193.65	25.82
										GW26_PFC1_K4_sc9	Neurons	GW26_PFC1_K4_sc9	240.1	320.13
										GW26_PFC1_K4_sc11	Neurons	GW26_PFC1_K4_sc11	138.17	449.05
										GW26_PFC1_K4_sc12	GABAergic neurons	GW26_PFC1_K4_sc12	2.94	8.81
										GW26_PFC1_K4_sc13	Neurons	GW26_PFC1_K4_sc13	44.33	4.03
										GW26_PFC1_K4_sc14	GABAergic neurons	GW26_PFC1_K4_sc14	69.37	450.91
										GW26_PFC1_K4_sc15	GABAergic neurons	GW26_PFC1_K4_sc15	0	7.87
										GW26_PFC1_K4_sc16	Neurons	GW26_PFC1_K4_sc16	0	0
										GW26_PFC1_H1_sc1	GABAergic neurons	GW26_PFC1_H1_sc1	0	0
										GW26_PFC1_H1_sc2	GABAergic neurons	GW26_PFC1_H1_sc2	0	206.15
										GW26_PFC1_H1_sc3	GABAergic neurons	GW26_PFC1_H1_sc3	0	767.46
										GW26_PFC1_H1_sc4	GABAergic neurons	GW26_PFC1_H1_sc4	0	36.98
										GW26_PFC1_H1_sc5	GABAergic neurons	GW26_PFC1_H1_sc5	0	171.62
										GW26_PFC1_H1_sc8	GABAergic neurons	GW26_PFC1_H1_sc8	0	663.48
										GW26_PFC1_H1_sc9	GABAergic neurons	GW26_PFC1_H1_sc9	0	174.26
										GW26_PFC1_H1_sc11	GABAergic neurons	GW26_PFC1_H1_sc11	0	34.49
										GW26_PFC1_H1_sc12	GABAergic neurons	GW26_PFC1_H1_sc12	12.61	25.22
										GW26_PFC1_H1_sc13	GABAergic neurons	GW26_PFC1_H1_sc13	0	34.03
										GW26_PFC1_H1_sc15	GABAergic neurons	GW26_PFC1_H1_sc15	0	933.74
										GW26_PFC1_H1_sc16	GABAergic neurons	GW26_PFC1_H1_sc16	0	0
										GW26_PFC1_H3_sc2	GABAergic neurons	GW26_PFC1_H3_sc2	6.56	32.8
										GW26_PFC1_H3_sc3	GABAergic neurons	GW26_PFC1_H3_sc3	44.38	7.4
										GW26_PFC1_H3_sc4	GABAergic neurons	GW26_PFC1_H3_sc4	307.72	17.1
										GW26_PFC1_H3_sc5	GABAergic neurons	GW26_PFC1_H3_sc5	10.94	317.34
										GW26_PFC1_H3_sc6	GABAergic neurons	GW26_PFC1_H3_sc6	7.62	472.4
										GW26_PFC1_H3_sc7	GABAergic neurons	GW26_PFC1_H3_sc7	2.37	2.37
										GW26_PFC1_H3_sc8	Astrocytes	GW26_PFC1_H3_sc8	3.78	226.56
										GW26_PFC1_H3_sc9	Astrocytes	GW26_PFC1_H3_sc9	145.88	167.4
										GW26_PFC1_H3_sc10	GABAergic neurons	GW26_PFC1_H3_sc10	8.13	8.13
										GW26_PFC1_H3_sc11	GABAergic neurons	GW26_PFC1_H3_sc11	0	0
										GW26_PFC1_H3_sc12	Neurons	GW26_PFC1_H3_sc12	0	297.77
										GW26_PFC1_H3_sc13	GABAergic neurons	GW26_PFC1_H3_sc13	176.21	53.17
										GW26_PFC1_H3_sc14	GABAergic neurons	GW26_PFC1_H3_sc14	0	0
										GW26_PFC1_H3_sc15	GABAergic neurons	GW26_PFC1_H3_sc15	239.62	290.39
										GW26_PFC1_H3_sc16	GABAergic neurons	GW26_PFC1_H3_sc16	3.81	38.11
										GW26_PFC1_G2_sc1	GABAergic neurons	GW26_PFC1_G2_sc1	0	637.82
										GW26_PFC1_G2_sc2	Neurons	GW26_PFC1_G2_sc2	0	0
										GW26_PFC1_G2_sc3	Astrocytes	GW26_PFC1_G2_sc3	192	2.26
										GW26_PFC1_G2_sc4	Astrocytes	GW26_PFC1_G2_sc4	156.3	101.39
										GW26_PFC1_G2_sc5	GABAergic neurons	GW26_PFC1_G2_sc5	0	0
										GW26_PFC1_G2_sc6	GABAergic neurons	GW26_PFC1_G2_sc6	0	106.7
										GW26_PFC1_G2_sc7	GABAergic neurons	GW26_PFC1_G2_sc7	0	423.02
										GW26_PFC1_G2_sc8	Neurons	GW26_PFC1_G2_sc8	0	257.85
										GW26_PFC1_G2_sc9	Astrocytes	GW26_PFC1_G2_sc9	167.45	4.53
										GW26_PFC1_G2_sc10	Astrocytes	GW26_PFC1_G2_sc10	2.19	4.39
										GW26_PFC1_G2_sc11	OPC	GW26_PFC1_G2_sc11	4.28	346.78
										GW26_PFC1_G2_sc12	OPC	GW26_PFC1_G2_sc12	0	0
										GW26_PFC1_G2_sc13	Neurons	GW26_PFC1_G2_sc13	0	0
										GW26_PFC1_G2_sc14	Astrocytes	GW26_PFC1_G2_sc14	0	252.12
										GW26_PFC1_G2_sc15	OPC	GW26_PFC1_G2_sc15	5.16	46.48
										GW26_PFC1_G2_sc16	GABAergic neurons	GW26_PFC1_G2_sc16	0	8.8
										GW26_PFC1_N2_sc1	OPC	GW26_PFC1_N2_sc1	0	9.83
										GW26_PFC1_N2_sc2	GABAergic neurons	GW26_PFC1_N2_sc2	3.6	107.88
										GW26_PFC1_N2_sc3	GABAergic neurons	GW26_PFC1_N2_sc3	0	7.03
										GW26_PFC1_N2_sc4	GABAergic neurons	GW26_PFC1_N2_sc4	200.96	523.55
										GW26_PFC1_N2_sc5	GABAergic neurons	GW26_PFC1_N2_sc5	0	16.91
										GW26_PFC1_N2_sc6	GABAergic neurons	GW26_PFC1_N2_sc6	0	15.91
										GW26_PFC1_N2_sc7	GABAergic neurons	GW26_PFC1_N2_sc7	3.81	70.44
										GW26_PFC1_N2_sc9	OPC	GW26_PFC1_N2_sc9	51.3	29.93
										GW26_PFC1_N2_sc11	GABAergic neurons	GW26_PFC1_N2_sc11	0	21.88
										GW26_PFC1_N2_sc12	GABAergic neurons	GW26_PFC1_N2_sc12	0	0
										GW26_PFC1_N2_sc14	OPC	GW26_PFC1_N2_sc14	405.04	11.25
										GW26_PFC1_N2_sc15	Astrocytes	GW26_PFC1_N2_sc15	11.16	0
										GW26_PFC1_N2_sc16	GABAergic neurons	GW26_PFC1_N2_sc16	0	10.58
										GW26_PFC1_N3_sc1	GABAergic neurons	GW26_PFC1_N3_sc1	0	1103.49
										GW26_PFC1_N3_sc2	Astrocytes	GW26_PFC1_N3_sc2	37.17	198.26
										GW26_PFC1_N3_sc3	OPC	GW26_PFC1_N3_sc3	112.53	123.25
										GW26_PFC1_N3_sc4	Neurons	GW26_PFC1_N3_sc4	0	574.8
										GW26_PFC1_N3_sc6	GABAergic neurons	GW26_PFC1_N3_sc6	0	32.07
										GW26_PFC1_N3_sc8	GABAergic neurons	GW26_PFC1_N3_sc8	0	357.88
										GW26_PFC1_N3_sc10	GABAergic neurons	GW26_PFC1_N3_sc10	0	0
										GW26_PFC1_N3_sc13	GABAergic neurons	GW26_PFC1_N3_sc13	0	0
										GW26_PFC1_N3_sc14	Astrocytes	GW26_PFC1_N3_sc14	0	0
										GW26_PFC1_N3_sc15	GABAergic neurons	GW26_PFC1_N3_sc15	0	9.28
										GW26_PFC1_N3_sc16	GABAergic neurons	GW26_PFC1_N3_sc16	0	8.27
										GW26_PFC1_G4_sc1	Astrocytes	GW26_PFC1_G4_sc1	3.52	96.72
										GW26_PFC1_G4_sc2	GABAergic neurons	GW26_PFC1_G4_sc2	0	19.04
										GW26_PFC1_G4_sc3	GABAergic neurons	GW26_PFC1_G4_sc3	0	0
										GW26_PFC1_G4_sc4	GABAergic neurons	GW26_PFC1_G4_sc4	4.51	4.51
										GW26_PFC1_G4_sc5	Neurons	GW26_PFC1_G4_sc5	0	181.77
										GW26_PFC1_G4_sc6	GABAergic neurons	GW26_PFC1_G4_sc6	0	52.79
										GW26_PFC1_G4_sc8	GABAergic neurons	GW26_PFC1_G4_sc8	16.73	0
										GW26_PFC1_I1_sc1	GABAergic neurons	GW26_PFC1_I1_sc1	5.16	0
										GW26_PFC1_I1_sc2	GABAergic neurons	GW26_PFC1_I1_sc2	0	21.84
										GW26_PFC1_I1_sc3	GABAergic neurons	GW26_PFC1_I1_sc3	0	0
										GW26_PFC1_I1_sc4	GABAergic neurons	GW26_PFC1_I1_sc4	0	0
										GW26_PFC1_I1_sc6	GABAergic neurons	GW26_PFC1_I1_sc6	0	253.74
										GW26_PFC1_I1_sc7	GABAergic neurons	GW26_PFC1_I1_sc7	376.37	182.11
										GW26_PFC1_I1_sc8	GABAergic neurons	GW26_PFC1_I1_sc8	0	15.52
										GW26_PFC1_I1_sc9	GABAergic neurons	GW26_PFC1_I1_sc9	0	18.99
										GW26_PFC1_I1_sc10	Neurons	GW26_PFC1_I1_sc10	176.44	0
										GW26_PFC1_I1_sc11	GABAergic neurons	GW26_PFC1_I1_sc11	0	703.19
										GW26_PFC1_I1_sc12	GABAergic neurons	GW26_PFC1_I1_sc12	0	36.75
										GW26_PFC1_I1_sc13	GABAergic neurons	GW26_PFC1_I1_sc13	8.02	585.24
										GW26_PFC1_I1_sc14	GABAergic neurons	GW26_PFC1_I1_sc14	5.48	16.45
										GW26_PFC1_I1_sc15	GABAergic neurons	GW26_PFC1_I1_sc15	55.27	128.97
										GW26_PFC1_I1_sc16	GABAergic neurons	GW26_PFC1_I1_sc16	0	72.95
										GW26_PFC1_M1_sc1	Neurons	GW26_PFC1_M1_sc1	0	117.26
										GW26_PFC1_M1_sc2	Neurons	GW26_PFC1_M1_sc2	36.55	36.55
										GW26_PFC1_M1_sc3	OPC	GW26_PFC1_M1_sc3	7.8	167.75
										GW26_PFC1_M1_sc4	GABAergic neurons	GW26_PFC1_M1_sc4	0	17.15
										GW26_PFC1_M1_sc5	GABAergic neurons	GW26_PFC1_M1_sc5	0	0
										GW26_PFC1_M1_sc6	GABAergic neurons	GW26_PFC1_M1_sc6	0	0
										GW26_PFC1_M1_sc7	Neurons	GW26_PFC1_M1_sc7	6.8	401.33
										GW26_PFC1_M1_sc8	OPC	GW26_PFC1_M1_sc8	0	0
										GW26_PFC1_M1_sc9	GABAergic neurons	GW26_PFC1_M1_sc9	0	119.2
										GW26_PFC1_M1_sc11	Neurons	GW26_PFC1_M1_sc11	0	7.05
										GW26_PFC1_M1_sc12	Neurons	GW26_PFC1_M1_sc12	0	39.98
										GW26_PFC1_M1_sc13	Neurons	GW26_PFC1_M1_sc13	7.69	7.69
										GW26_PFC1_M1_sc15	Neurons	GW26_PFC1_M1_sc15	0	262.4
										GW26_PFC1_M1_sc16	Neurons	GW26_PFC1_M1_sc16	4.93	285.78
										GW26_PFC1_M2_sc1	GABAergic neurons	GW26_PFC1_M2_sc1	3.21	12.83
										GW26_PFC1_M2_sc2	OPC	GW26_PFC1_M2_sc2	525.26	0
										GW26_PFC1_M2_sc3	GABAergic neurons	GW26_PFC1_M2_sc3	3.9	191.33
										GW26_PFC1_M2_sc4	GABAergic neurons	GW26_PFC1_M2_sc4	24.38	12.19
										GW26_PFC1_M2_sc5	GABAergic neurons	GW26_PFC1_M2_sc5	0	0
										GW26_PFC1_M2_sc6	GABAergic neurons	GW26_PFC1_M2_sc6	50.69	160.51
										GW26_PFC1_M2_sc8	GABAergic neurons	GW26_PFC1_M2_sc8	25.01	8.34
										GW26_PFC1_M2_sc9	GABAergic neurons	GW26_PFC1_M2_sc9	25.32	37.99
										GW26_PFC1_M2_sc10	GABAergic neurons	GW26_PFC1_M2_sc10	0	18.75
										GW26_PFC1_M2_sc11	OPC	GW26_PFC1_M2_sc11	652.08	84.07
										GW26_PFC1_M2_sc12	GABAergic neurons	GW26_PFC1_M2_sc12	0	37.15
										GW26_PFC1_M2_sc13	GABAergic neurons	GW26_PFC1_M2_sc13	15.57	20.76
										GW26_PFC1_M2_sc14	GABAergic neurons	GW26_PFC1_M2_sc14	0	205.18
										GW26_PFC1_M2_sc16	Neurons	GW26_PFC1_M2_sc16	186.2	20.19
										GW26_PFC1_Q2_sc1	Neurons	GW26_PFC1_Q2_sc1	0	0
										GW26_PFC1_Q2_sc2	Neurons	GW26_PFC1_Q2_sc2	5.05	25.26
										GW26_PFC1_Q2_sc3	Neurons	GW26_PFC1_Q2_sc3	0	11
										GW26_PFC1_Q2_sc5	GABAergic neurons	GW26_PFC1_Q2_sc5	0	5.87
										GW26_PFC1_Q2_sc6	GABAergic neurons	GW26_PFC1_Q2_sc6	0	1208.29
										GW26_PFC1_Q2_sc7	GABAergic neurons	GW26_PFC1_Q2_sc7	8.27	314.23
										GW26_PFC1_Q2_sc8	Neurons	GW26_PFC1_Q2_sc8	0	225.3
										GW26_PFC1_Q2_sc9	Neurons	GW26_PFC1_Q2_sc9	0	1127.21
										GW26_PFC1_Q2_sc10	GABAergic neurons	GW26_PFC1_Q2_sc10	0	0
										GW26_PFC1_Q2_sc11	OPC	GW26_PFC1_Q2_sc11	25.53	38.3
										GW26_PFC1_Q2_sc12	Neurons	GW26_PFC1_Q2_sc12	0	145.6
										GW26_PFC1_Q2_sc13	GABAergic neurons	GW26_PFC1_Q2_sc13	0	12.67
										GW26_PFC1_Q2_sc14	Neurons	GW26_PFC1_Q2_sc14	522.51	29.03
										GW26_PFC1_Q2_sc15	GABAergic neurons	GW26_PFC1_Q2_sc15	0	28.35
										GW26_PFC1_Q2_sc16	OPC	GW26_PFC1_Q2_sc16	0	27.37
										GW26_PFC1_I2_sc1	Astrocytes	GW26_PFC1_I2_sc1	7	14
										GW26_PFC1_I2_sc2	Astrocytes	GW26_PFC1_I2_sc2	2.56	46
										GW26_PFC1_I2_sc3	Astrocytes	GW26_PFC1_I2_sc3	26.13	104.51
										GW26_PFC1_I2_sc4	GABAergic neurons	GW26_PFC1_I2_sc4	25.35	69.72
										GW26_PFC1_I2_sc5	GABAergic neurons	GW26_PFC1_I2_sc5	0	50.34
										GW26_PFC1_I2_sc6	Neurons	GW26_PFC1_I2_sc6	68.73	5.89
										GW26_PFC1_I2_sc7	GABAergic neurons	GW26_PFC1_I2_sc7	0	213.72
										GW26_PFC1_I2_sc8	GABAergic neurons	GW26_PFC1_I2_sc8	0	0
										GW26_PFC1_I2_sc10	GABAergic neurons	GW26_PFC1_I2_sc10	50.77	50.77
										GW26_PFC1_I2_sc12	GABAergic neurons	GW26_PFC1_I2_sc12	0	160.79
										GW26_PFC1_I2_sc13	GABAergic neurons	GW26_PFC1_I2_sc13	24.21	0
										GW26_PFC1_I2_sc14	Astrocytes	GW26_PFC1_I2_sc14	225.46	17.89
										GW26_PFC1_I2_sc15	GABAergic neurons	GW26_PFC1_I2_sc15	0	0
										GW26_PFC1_I2_sc16	GABAergic neurons	GW26_PFC1_I2_sc16	0	0
										GW26_PFC1_I2_sc17	Astrocytes	GW26_PFC1_I2_sc17	2.18	351.58
										GW26_PFC1_I2_sc18	GABAergic neurons	GW26_PFC1_I2_sc18	0	81.43
										GW26_PFC1_I2_sc19	Astrocytes	GW26_PFC1_I2_sc19	20.89	0
										GW26_PFC1_I2_sc20	GABAergic neurons	GW26_PFC1_I2_sc20	113.38	1040.78
										GW26_PFC1_I2_sc21	Astrocytes	GW26_PFC1_I2_sc21	2.81	8.43
										GW26_PFC1_I2_sc24	GABAergic neurons	GW26_PFC1_I2_sc24	0	36.56
										GW26_PFC1_J3_sc1	Neurons	GW26_PFC1_J3_sc1	0	504.52
										GW26_PFC1_J3_sc2	Neurons	GW26_PFC1_J3_sc2	0	45.5
										GW26_PFC1_J3_sc3	GABAergic neurons	GW26_PFC1_J3_sc3	33.1	105.51
										GW26_PFC1_J3_sc4	GABAergic neurons	GW26_PFC1_J3_sc4	0	100.88
										GW26_PFC1_J3_sc5	Neurons	GW26_PFC1_J3_sc5	8.92	174.02
										GW26_PFC1_J3_sc6	GABAergic neurons	GW26_PFC1_J3_sc6	0	0
										GW26_PFC1_J3_sc7	GABAergic neurons	GW26_PFC1_J3_sc7	0	18.38
										GW26_PFC1_J3_sc8	GABAergic neurons	GW26_PFC1_J3_sc8	0	0
										GW26_PFC1_J3_sc9	GABAergic neurons	GW26_PFC1_J3_sc9	163.96	120.71
										GW26_PFC1_J3_sc10	GABAergic neurons	GW26_PFC1_J3_sc10	0	13.55
										GW26_PFC1_J3_sc11	Neurons	GW26_PFC1_J3_sc11	37.5	34.61
										GW26_PFC1_J3_sc12	GABAergic neurons	GW26_PFC1_J3_sc12	0	28.08
										GW26_PFC1_J3_sc13	OPC	GW26_PFC1_J3_sc13	384.27	0
										GW26_PFC1_J3_sc14	Neurons	GW26_PFC1_J3_sc14	16.85	0
										GW26_PFC1_J3_sc15	GABAergic neurons	GW26_PFC1_J3_sc15	0	17.42
										GW26_PFC1_J3_sc16	GABAergic neurons	GW26_PFC1_J3_sc16	0	12.3
										GW26_PFC1_K3_sc1	GABAergic neurons	GW26_PFC1_K3_sc1	0	22.35
										GW26_PFC1_K3_sc2	GABAergic neurons	GW26_PFC1_K3_sc2	213.16	198.04
										GW26_PFC1_K3_sc3	GABAergic neurons	GW26_PFC1_K3_sc3	2.22	363.7
										GW26_PFC1_K3_sc4	GABAergic neurons	GW26_PFC1_K3_sc4	12.63	165.95
										GW26_PFC1_K3_sc5	GABAergic neurons	GW26_PFC1_K3_sc5	52.92	246.95
										GW26_PFC1_K3_sc6	GABAergic neurons	GW26_PFC1_K3_sc6	176.88	20.25
										GW26_PFC1_K3_sc7	GABAergic neurons	GW26_PFC1_K3_sc7	0	71.78
										GW26_PFC1_K3_sc8	GABAergic neurons	GW26_PFC1_K3_sc8	28.24	106.67
										GW26_PFC1_K3_sc9	OPC	GW26_PFC1_K3_sc9	0	0
										GW26_PFC1_K3_sc10	OPC	GW26_PFC1_K3_sc10	0	0
										GW26_PFC1_K3_sc12	Astrocytes	GW26_PFC1_K3_sc12	123.13	7.24
										GW26_PFC1_K3_sc13	Neurons	GW26_PFC1_K3_sc13	44.22	11.05
										GW26_PFC1_K3_sc14	GABAergic neurons	GW26_PFC1_K3_sc14	0	26.27
										GW26_PFC1_K3_sc15	GABAergic neurons	GW26_PFC1_K3_sc15	0	114.99
										GW26_PFC1_K3_sc16	GABAergic neurons	GW26_PFC1_K3_sc16	0	0
										GW26_PFC1_O3_sc2	GABAergic neurons	GW26_PFC1_O3_sc2	0	0
										GW26_PFC1_O3_sc3	GABAergic neurons	GW26_PFC1_O3_sc3	0	0
										GW26_PFC1_O3_sc5	GABAergic neurons	GW26_PFC1_O3_sc5	0	308.26
										GW26_PFC1_O3_sc7	GABAergic neurons	GW26_PFC1_O3_sc7	7.34	73.43
										GW26_PFC1_O3_sc8	Neurons	GW26_PFC1_O3_sc8	0	0
										GW26_PFC1_O3_sc9	GABAergic neurons	GW26_PFC1_O3_sc9	0	0
										GW26_PFC1_O3_sc10	GABAergic neurons	GW26_PFC1_O3_sc10	0	547.77
										GW26_PFC1_O3_sc11	GABAergic neurons	GW26_PFC1_O3_sc11	0	16.76
										GW26_PFC1_O3_sc12	Neurons	GW26_PFC1_O3_sc12	0	37.64
										GW26_PFC1_O3_sc13	GABAergic neurons	GW26_PFC1_O3_sc13	0	1188.69
										GW26_PFC1_O3_sc14	GABAergic neurons	GW26_PFC1_O3_sc14	0	0
										GW26_PFC1_O3_sc15	GABAergic neurons	GW26_PFC1_O3_sc15	0	62.26
										GW26_PFC1_O3_sc16	GABAergic neurons	GW26_PFC1_O3_sc16	0	1010.24
										GW26_PFC1_P4_sc1	Astrocytes	GW26_PFC1_P4_sc1	0	0
										GW26_PFC1_P4_sc2	GABAergic neurons	GW26_PFC1_P4_sc2	0	12.69
										GW26_PFC1_P4_sc3	GABAergic neurons	GW26_PFC1_P4_sc3	0	0
										GW26_PFC1_P4_sc4	GABAergic neurons	GW26_PFC1_P4_sc4	3.02	105.63
										GW26_PFC1_P4_sc5	Neurons	GW26_PFC1_P4_sc5	0	6.58
										GW26_PFC1_P4_sc7	GABAergic neurons	GW26_PFC1_P4_sc7	0	20.33
										GW26_PFC1_P4_sc8	GABAergic neurons	GW26_PFC1_P4_sc8	3.55	386.66
										GW26_PFC1_J1_sc1	Neurons	GW26_PFC1_J1_sc1	264.34	933.46
										GW26_PFC1_J1_sc4	OPC	GW26_PFC1_J1_sc4	7.2	14.4
										GW26_PFC1_J1_sc5	Neurons	GW26_PFC1_J1_sc5	0	1086.05
										GW26_PFC1_J1_sc6	Neurons	GW26_PFC1_J1_sc6	0	211.3
										GW26_PFC1_J1_sc7	Neurons	GW26_PFC1_J1_sc7	0	9.5
										GW26_PFC1_J1_sc8	Astrocytes	GW26_PFC1_J1_sc8	0	0
										GW26_PFC1_J1_sc9	OPC	GW26_PFC1_J1_sc9	0	45.83
										GW26_PFC1_J1_sc10	GABAergic neurons	GW26_PFC1_J1_sc10	0	549.58
										GW26_PFC1_J1_sc12	GABAergic neurons	GW26_PFC1_J1_sc12	0	7.03
										GW26_PFC1_J1_sc13	Astrocytes	GW26_PFC1_J1_sc13	180.11	180.11
										GW26_PFC1_J1_sc14	GABAergic neurons	GW26_PFC1_J1_sc14	0	7.7
										GW26_PFC1_J1_sc15	OPC	GW26_PFC1_J1_sc15	115.3	9.61
										GW26_PFC1_J1_sc16	OPC	GW26_PFC1_J1_sc16	0	7.62
										GW26_PFC1_L2_sc1	GABAergic neurons	GW26_PFC1_L2_sc1	106.06	148.49
										GW26_PFC1_L2_sc2	GABAergic neurons	GW26_PFC1_L2_sc2	28.66	14.33
										GW26_PFC1_L2_sc3	Neurons	GW26_PFC1_L2_sc3	746.98	738.5
										GW26_PFC1_L2_sc4	GABAergic neurons	GW26_PFC1_L2_sc4	0	0
										GW26_PFC1_L2_sc5	Neurons	GW26_PFC1_L2_sc5	0	135.64
[truncated: 309 more rows]
