# Supplementary material for: 5'-UTR SNP of FGF13 causes translational defect and intellectual disability
Source: eLife. 2021 Jun 29;10:e63021. doi: 10.7554/eLife.63021 (PMC8241442; doi:10.7554/eLife.63021)
Supplement: Figure 5—source data 1. [file elife-63021-fig5-data1.xlsx]

## Sheet: Figure 5B
Figure 5B
LC-MS/MS results of pull-downed proteins with synthesized RNAs of WT and Mut FGF13 5’-UTR
Shown in heatmap
	Protein name	PSM WT-1	PSM WT-2	PSM WT-3	PSM WT-4	PSM WT-mean	PSM Mut-1	PSM Mut-2	PSM Mut-3	PSM Mut-4	PSM Mut-mean	PSM NC-1	PSM NC-2	PSM NC-3	PSM NC-4	PSM NC-5	PSM NC-mean
	PTBP1	49	54	97	42	60.5	28	42	42	35	36.75	9	6	12	1	15	8.6
	MATR3	66	46	64	81	64.25	52	45	93	77	66.75	2	3	2	1	5	2.6
	IGF2BP1	20	20	10	37	21.75	13	12	9	29	15.75					5	5
	PTBP3	11	8	7	12	9.5	10	7	7	12	9	1				2	1.5
	HNRNPUL1	20	17	13	30	20	19	10	14	28	17.75	1	1	1	1	2	1.2
	RBMX	10	9	1	17	9.25	6	3	7	13	7.25	1		1		2	1.33333
	RBM4B	10	9	4	12	8.75	3	3	3	6	3.75						0
	RBM14	14	12	11	23	15	16	12	18	18	16	1		1		1	0.6
	RAVER1	11	9	17	13	12.5	5	2	1	4	3						0
	IGF2BP3	12	12	3	18	11.25	10	7	6	14	9.25					1	1

## Sheet: Figure 5C
Figure 5C
Pull-downed PTBP1 level in HEK293
	Experiment #	WT	Mut				Statistics summary
	1	1	0.302566				Mut vs WT (One-tailed paired t test)
	2	1	0.792756				P value	0.0399
	3	1	0.355808				P value summary	*
							Significantly different (P < 0.05)?	Yes

## Sheet: Figure 5D
Figure 5D
Pull-downed PTBP1 level (purified)
	Experiment #	WT	Mut				Statistics summary
	1	1	0.656968				Mut vs WT (One-tailed paired t test)
	2	1	0.798385				P value	0.0107
	3	1	0.718227				P value summary	*
							Significantly different (P < 0.05)?	Yes

## Sheet: Figure 5F
Figure 5F
Protein levels (normalized to actin) in mouse cortex, normalized to E12 levels
			PTBP1				PTBP2				FGF13
			Mouse #
		Developmental stages	1	2	3	4	1	2	3	4	1	2	3	4
		E12	0.968036	0.847519	0.965897	1.21855	1.44772	1.04373	1.06817	0.440373	0.805507	0.787828	0.71997	1.68669
		E14	0.832767	1.01116	0.613028	0.968173	1.70007	2.18523	3.11372	3.83398	1.02131	1.22521	1.17281	1.482
		E16	0.278532	0.349394	0.365338		3.84858	4.42453	3.52104		0.666085	0.747248	0.733468
		P0	0.012919	0.015352			1.43866	2.0243			1.82485	2.6548
		P2	0.023518	0.033964			2.22594	2.18678			1.37988	1.77841
		P4	0.005871	0.005725			2.3149	2.07056			1.08483	1.35158
		P6	0.007242	0.007466	0.007489		1.41924	1.46322	1.46761		3.59539	3.7068	3.71792
		P8	0.057691	0.061624	0.048867		1.11373	1.18967	0.943388		4.70915	5.03023	3.98888

## Sheet: Figure 5G
Figure 5G
PTBP1 and PTBP2 mRNA levels (normalized to GAPDH) in different cells
			PTBP1				PTBP2
			Experiment #
		Cell name	1	2	3	4	1	2	3	4
		HEK293	0.0481607	0.0200519	0.0521538	0.0551305	0.00145564	0.00083113	0.00258728	0.0021943
		iPSCs	0.0279976	0.0302481	0.0310096		0.00332249	0.00398995	0.00714665
		NSCs	0.00735696	0.00923783	0.00617845	0.00997913	0.00735696	0.00923783	0.00617845	0.00997913
		Statistics summary
		PTBP2 vs PTBP1 (Two-way ANOVA)
		Source of Variation	P value	P value summary		Significantly different (P < 0.05)?
		Interaction	<0.0001	***		Yes
		Cell line	0.003	**		Yes
		Gene	<0.0001	***		Yes
		Bonferroni's multiple comparisons test
			Mean Diff.	95.00% CI of diff.	Significant?	Summary	Adjusted P Value
		PTBP1
		HEK293 vs. iPSCs	0.01412	-0.0004419 to 0.02869	No	ns	0.059
		HEK293 vs. NSCs	0.03569	0.0222 to 0.04917	Yes	***	<0.0001
		iPSCs vs. NSCs	0.02156	0.006999 to 0.03613	Yes	**	0.0034
		PTBP2
		HEK293 vs. iPSCs	-0.003053	-0.01762 to 0.01151	No	ns	>0.9999
		HEK293 vs. NSCs	-0.006421	-0.0199 to 0.007063	No	ns	0.6637
		iPSCs vs. NSCs	-0.003368	-0.01793 to 0.0112	No	ns	>0.9999

## Sheet: Figure 5H
Figure 5H
Pull-downed PTBP2 level in mouse cortex
	Experiment #	WT	Mut				Statistics summary
	1	1	0.615163				Mut vs WT (One-tailed paired t test)
	2	1	0.855068				P value	0.0027
	3	1	0.983987				P value summary	**
	4	1	0.90322				Significantly different (P < 0.05)?	Yes
	5	1	0.727688
	6	1	0.480849
	7	1	1.12449
	8	1	0.368904
	9	1	0.661737
	10	1	0.541959

## Sheet: Figure 5I
Figure 5I
Pull-downed PTBP2 level (purified)
	Experiment #	WT	Mut				Statistics summary
	1	1	0.022007				Mut vs WT (One-tailed paired t test)
	2	1	0.057697				P value	0.0006
	3	1	0.131141				P value summary	***
							Significantly different (P < 0.05)?	Yes

## Sheet: Figure 5L
Figure 5L
UV-crosslinking RNA immunoprecipitation in WT/Mut iPSCs
		Normalized FGF13 mRNA enrichment (IP/input), relative to IgG
	Experiment #	FGF13WT	FGF13Mut					Statistics summary
	1	10.1811	1.40976					Mut vs WT (One-tailed paired t test)
	2	3.18415	1.24941					P value	0.0204
	3	5.55784	1.34129					P value summary	*
								Significantly different (P < 0.05)?	Yes
		Normalized GAPDH mRNA enrichment (IP/input), relative to IgG						Statistics summary
	Experiment #	FGF13WT	FGF13Mut					Mut vs WT (One-tailed paired t test)
	1	1.5919	1.27697					P value	0.4581
	2	1.11258	1.59683					P value summary	ns
	3	1.17944	1.09047					Significantly different (P < 0.05)?	No
