# Supplementary material for: 5'-UTR SNP of FGF13 causes translational defect and intellectual disability
Source: eLife. 2021 Jun 29;10:e63021. doi: 10.7554/eLife.63021 (PMC8241442; doi:10.7554/eLife.63021)
Supplement: Figure 6—source data 1. [file elife-63021-fig6-data1.xlsx]

## Sheet: Figure 6A
Figure 6A
FGF13 and PTBP1 levels (normalize to actin for protein, to GAPDH for mRNA) after knockdown in HEK293
		FGF13 protein level
	Experiment #	siNC	siPTBP1				Statistics summary
	1	1	0.153948				siPTBP1 vs siNC (Two-tailed paired t test)
	2	1	0.271775				P value	0.0077
	3	1	0.390566				P value summary	**
	4	1	0.621502				Significantly different (P < 0.05)?	Yes
		PTBP1 protein level
	Experiment #	siNC	siPTBP1				Statistics summary
	1	1	0.04396				siPTBP1 vs siNC (Two-tailed paired t test)
	2	1	0.335549				P value	0.0032
	3	1	0.184499				P value summary	**
	4	1	0.435733				Significantly different (P < 0.05)?	Yes
		FGF13 mRNA level
	Experiment #	siNC	siPTBP1				Statistics summary
	1	1	1.49819				siPTBP1 vs siNC (Two-tailed paired t test)
	2	1	0.633203				P value	0.81
	3	1	0.631617				P value summary	ns
							Significantly different (P < 0.05)?	No
		PTBP1 mRNA level
	Experiment #	siNC	siPTBP1				Statistics summary
	1	1	0.355792				Mut vs WT (Two-tailed paired t test)
	2	1	0.146266				P value	0.0066
	3	1	0.20344				P value summary	**
							Significantly different (P < 0.05)?	Yes

## Sheet: Figure 6B
Figure 6B
FGF13 and PTBP2 protein levels (normalize to actin) after knockdown in mouse cortical neurons
		FGF13 protein level
	Experiment #	siNC	siPTBP2				Statistics summary
	1	1	0.709175				siPTBP2 vs siNC (Two-tailed paired t test)
	2	1	0.300786				P value	0.0425
	3	1	0.70254				P value summary	*
	4	1	0.790481				Significantly different (P < 0.05)?	Yes
		PTBP2 protein level
	Experiment #	siNC	siPTBP2				Statistics summary
	1	1	0.448363				siPTBP2 vs siNC (Two-tailed paired t test)
	2	1	0.190281				P value	0.0018
	3	1	0.395407				P value summary	**
	4	1	0.207251				Significantly different (P < 0.05)?	Yes

## Sheet: Figure 6D
Figure 6D
RNA immunoprecipitation in HEK293 cells transfected with MS2-FGF13 and Flag-MCP-PTBP2/Flag-PTBP2
		Normalized FGF13 mRNA enrichment (IP/input), relative to Flag-PTBP2						Statistics summary
	Experiment #	Flag-PTBP2	Flag-MCP-PTBP2					WT vs IgG (Two-tailed paired t test)
	1	1	7.63757					P value	0.0262
	2	1	9.85679					P value summary	*
	3	1	5.96488					Significantly different (P < 0.05)?	Yes
		Normalized GAPDH mRNA enrichment (IP/input), relative to Flag-PTBP2						Statistics summary
	Experiment #	Flag-PTBP2	Flag-MCP-PTBP2					WT vs IgG (Two-tailed paired t test)
	1	1	1.07639					P value	0.3807
	2	1	1.08442					P value summary	ns
	3	1	0.966498					Significantly different (P < 0.05)?	No

## Sheet: Figure 6E
Figure 6E
FGF13 protein levels (normalize to actin) in HEK293 cells transfected with MS2-FGF13 and Flag-MCP-PTBP2/Flag-PTBP2
		FGF13 protein level
	Experiment #	siNC	siPTBP1				Statistics summary
	1	1	2.18868				siPTBP1 vs siNC (Two-tailed paired t test)
	2	1	1.78637				P value	0.0054
	3	1	1.67084				P value summary	**
	4	1	1.73599				Significantly different (P < 0.05)?	Yes

## Sheet: Figure 6G
Figure 6G
Pull-downed PTBP2 fused proteins by synthesized WT/Mut FGF13 RNA
		Flag-wPUF-PTBP2					Statistics summary
	Experiment #	none	WT RNA	Mut RNA			Mut RNA vs WT RNA (Two-tailed paired t test)
	1	0.015711	1	0.642735			P value	0.0099
	2	0.121565	1	0.705804			P value summary	**
	3	0.211221	1	0.582368			Significantly different (P < 0.05)?	Yes
		Flag-mPUF-PTBP2					Statistics summary
	Experiment #	none	WT RNA	Mut RNA			Mut RNA vs WT RNA (Two-tailed paired t test)
	1	0.013588	1	1.0109			P value	0.2386
	2	0.155081	1	0.912719			P value summary	ns
	3	0.142915	1	0.877746			Significantly different (P < 0.05)?	No

## Sheet: Figure 6H
Figure 6H
FGF13 expression in cultured cortical neurons of mutant mice, infected by lenti-virus
		Lentivirus name
	Experiment #	Vector	wPUF	mPUF			Statistics summary
	1	1	1.41389	2.35032			wPUF vs Vector (Two-tailed paired t test)
	2	1	0.73848	1.62609			P value	0.1737
	3	1	0.783037	1.22235			P value summary	ns
	4	1	0.896415	1.64129			Significantly different (P < 0.05)?	No
	5	1	0.927881	1.11027			mPUF vs Vector (Two-tailed paired t test)
	6	1	0.824544	1.36886			P value	0.0357
	7	1	0.793157	1.24412			P value summary	*
	8	1	0.570359	0.819027			Significantly different (P < 0.05)?	Yes
							mPUF vs wPUF (Two-tailed paired t test)
							P value	0.0008
							P value summary	***
							Significantly different (P < 0.05)?	Yes

## Sheet: Figure 6I
Figure 6I
DIV4 cortical neurons from WT and Mut mice (electroporated with different plasmids)
		Ratio of polarized neurons (%)						Statistics summary
	Experiment #	WT+Vector	Mut+Vector	Mut+wPUF-PTBP2	Mut+mPUF-PTBP2			Mut+Vector vs WT+Vector (One-tailed Mann Whitney U test)
	1	80.5556	69.2308	62.1622	78.125			P value	0.05
	2	81.25	67.6471	68.421	80.5556			P value summary	*
	3	82.5	67.6471	67.8571	80			Significantly different (P < 0.05)?	Yes
								Mut+mPUF-PTBP2 vs Mut+Vector (One-tailed Mann Whitney U test)
								P value	0.05
								P value summary	*
								Significantly different (P < 0.05)?	Yes
								Mut+mPUF-PTBP2 vs Mut+wPUF-PTBP2 (One-tailed Mann Whitney U test)
								P value	0.05
								P value summary	*
		Axon branching points						Significantly different (P < 0.05)?	Yes
	Neuron #	WT+Vector	Mut+Vector	Mut+wPUF-PTBP2	Mut+mPUF-PTBP2
	1	2	2	2	2
	2	5	1	2	4
	3	1	5	2	2			Statistics summary
	4	2	5	2	3			Mut+Vector vs WT+Vector (One-tailed Mann Whitney U test)
	5	4	3	3	3			P value	1.6671e-10
	6	3	3	5	2			P value summary	***
	7	2	2	4	2			Significantly different (P < 0.05)?	Yes
	8	2	2	6	2			Mut+mPUF-PTBP2 vs Mut+Vector (One-tailed Mann Whitney U test)
	9	1	3	3	2			P value	1.88386e-08
	10	4	1	3	2			P value summary	***
	11	2	4	3	1			Significantly different (P < 0.05)?	Yes
	12	2	2	4	3			Mut+mPUF-PTBP2 vs Mut+wPUF-PTBP2 (One-tailed Mann Whitney U test)
	13	1	2	3	3			P value	3.65279e-09
	14	2	3	1	2			P value summary	***
	15	2	5	3	1			Significantly different (P < 0.05)?	Yes
	16	1	5	5	1
	17	1	6	3	1
	18	1	5	4	2
	19	2	5	4	3
	20	1	3	5	2
	21	1	4	3	2
	22	1	3	4	2
	23	1	6	4	3
	24	1	5	3	2
	25	2	2	2	2
	26	1	5	4	2
	27	4	4	4	2
	28	2	3	3	1
	29	2	3	5	3
	30	1	4	3	3
	31	1	4	3	2
	32	2	1	4	3
	33	1	3	3	2
	34	3	2	4	2
	35	3	5	4	4
	36	4	3	2	1
	37	4	1	2	2
	38	2	2	4	2
	39	2	2	2	1
	40	2	4	3	2
	41	3	3	4	2
	42	2	2	6	2
	43	2	4	2	2
	44	1	3	2	2
	45	2	5	3	1
	46	1	5	4	2
	47	1	3	2	3
	48	2	6	3	1
	49	1	5	2	3
	50	1	3	1	2
	51	2	2	3	2
	52	3	4	3	3
	53	1	3	3	1
	54	2	3	2	2
	55	2	1	2	1
	56	1	4	2	2
	57	1	2	3	1
	58	1	3	3	1
	59	1	4	3	1
	60	2	2	3	2
	61	3	3	3	1
	62	1	2	3	1
	63	1	3	5	2
	64	2	5	4	3
	65	2	3	3	2
	66	1	3	6	3
	67	2	4	3	1
	68	1	4	1	3
	69	1	2	2	1
	70	1	3	1	3
	71	2	4	5	1
	72	3	4	2	2
	73	1	3	5	3
	74	1	6	1	1
	75	2	1	3	2
	76	1	2	4	4
	77	3	1	3	4
	78	4	3	2	1
	79	1	2		2
	80	3	2		3
	81	2	6		1
	82	4	6		4
	83	3	6		3
	84	2	1		4
	85	3	1		1
	86	1	6		4
	87	1	1		2
	88	3	1		3
	89	4	3		4
	90	4	2		2
	91	2	5		3
	92	3	2		1
	93	4			3
	94	2			1
	95	3			2
	96	2
	97	1
	98	4
	99	1
	100	1
